# Supplementary material for: Characterization of methionine dependence in melanoma cells
Source: bioRxiv preprint, doi:10.1101/2023.04.05.535723, version 1 (2023-04-05)
Supplement: Supplementary Data - Proteomics [file 535723_file10.xlsx]

## Sheet: TMT1_MeWo
							MeWo Ctrl 1	MeWo Ctrl 2	MeWo Ctrl 3	MeWo Ctrl 4	MeWo Ctrl 5	MeWo HCY 6	MeWo HCY 7	MeWo HCY 8	MeWo HCY 9	MeWo HCY 10	pool				MeWo Ctrl 1	MeWo Ctrl 2	MeWo Ctrl 3	MeWo Ctrl 4	MeWo Ctrl 5	MeWo HCY 6	MeWo HCY 7	MeWo HCY 8	MeWo HCY 9	MeWo HCY 10	pool				Limma -ebayes results											Treat with logFC 1.2
id	Peptide IDs	Protein IDs	Protein names	Gene names	Fasta headers	Protein	Reporter intensity corrected 1 TMT1	Reporter intensity corrected 2 TMT1	Reporter intensity corrected 3 TMT1	Reporter intensity corrected 4 TMT1	Reporter intensity corrected 5 TMT1	Reporter intensity corrected 6 TMT1	Reporter intensity corrected 7 TMT1	Reporter intensity corrected 8 TMT1	Reporter intensity corrected 9 TMT1	Reporter intensity corrected 10 TMT1	Reporter intensity corrected 11 TMT1	zeros			Reporter intensity corrected 1 TMT1	Reporter intensity corrected 2 TMT1	Reporter intensity corrected 3 TMT1	Reporter intensity corrected 4 TMT1	Reporter intensity corrected 5 TMT1	Reporter intensity corrected 6 TMT1	Reporter intensity corrected 7 TMT1	Reporter intensity corrected 8 TMT1	Reporter intensity corrected 9 TMT1	Reporter intensity corrected 10 TMT1	Reporter intensity corrected 11 TMT1					logFC	AveExpr	t	P.Value	adj.P.Val	B	Fasta headers				Protein	logFC	AveExpr	t
2616	2099;5109;21978;24628;32928;36907;37627;45236;61222;62791;66528;66805;67291	A8YXX5	MTCH1 mitochondrial carrier 1 (apoptosis)	PIG60	tr|A8YXX5|A8YXX5_HUMAN Cell proliferation-inducing protein 60 OS=Homo sapiens OX=9606 GN=PIG60 PE=2 SV=1	A8YXX5	10745	6083.8	13059	4361.4	9535.9	31932	39336	40257	33746	25785	28477	0			13.3914	12.5708	13.6728	12.0906	13.2192	14.9627	15.2636	15.297	15.0424	14.6542	14.7975	A8YXX5	2.11261		A8YXX5	2.05505	14.0165	13.3258	4.45154e-16	2.77954e-12	25.6367	tr|A8YXX5|A8YXX5_HUMAN Cell proliferation-inducing protein 60 OS=Homo sapiens OX=9606 GN=PIG60 PE=2 SV=1				A8YXX5	2.05505	14.0165	11.6202
3590	3892;8174;10059;43575	D6RFG3;D6REL6;I6L9I8;Q9H201;B4DIQ9;A4QMU9;B4DK18;D6RBR6	Epsin-3	EPN3	tr|D6RFG3|D6RFG3_HUMAN Epsin-3 (Fragment) OS=Homo sapiens OX=9606 GN=EPN3 PE=1 SV=1;tr|D6REL6|D6REL6_HUMAN Epsin-3 (Fragment) OS=Homo sapiens OX=9606 GN=EPN3 PE=1 SV=1;tr|I6L9I8|I6L9I8_HUMAN EPN3 protein OS=Homo sapiens OX=9606 GN=EPN3 PE=1 SV=1;sp|Q9H201|	D6RFG3	57713	49069	52721	43868	41320	47099	242140	97514	76930	234520	146870	0			15.8166	15.5825	15.6861	15.4209	15.3346	15.5234	17.8855	16.5733	16.2313	17.8393	17.1642	D6RFG3	1.18404		D6RFG3	1.24243	16.1893	5.59637	1.89918e-06	0.0003205	4.94535	tr|D6RFG3|D6RFG3_HUMAN Epsin-3 (Fragment) OS=Homo sapiens OX=9606 GN=EPN3 PE=1 SV=1;tr|D6REL6|D6REL6_HUMAN Epsin-3 (Fragment) OS=Homo sapiens OX=9606 GN=EPN3 PE=1 SV=1;tr|I6L9I8|I6L9I8_HUMAN EPN3 protein OS=Homo sapiens OX=9606 GN=EPN3 PE=1 SV=1;sp|Q9H201|				D6RFG3	1.24243	16.1893	4.41157
2659	18342;44492	B1AT47;B2RCN8;Q9Y692	Glucocorticoid modulatory element-binding protein 1	GMEB1	tr|B1AT47|B1AT47_HUMAN Glucocorticoid modulatory element binding protein 1, isoform CRA_a OS=Homo sapiens OX=9606 GN=GMEB1 PE=2 SV=1;tr|B2RCN8|B2RCN8_HUMAN cDNA, FLJ96179, highly similar to Homo sapiens glucocorticoid modulatory element binding protein 1 (	B1AT47	32041	25030	26158	20327	31980	31890	103620	43553	45163	102800	66033	0			14.9676	14.6114	14.675	14.3111	14.9649	14.9608	16.6609	15.4105	15.4628	16.6495	16.0109	B1AT47	1.18765		B1AT47	1.12292	15.2675	6.28184	2.12861e-07	5.77871e-05	7.03123	tr|B1AT47|B1AT47_HUMAN Glucocorticoid modulatory element binding protein 1, isoform CRA_a OS=Homo sapiens OX=9606 GN=GMEB1 PE=2 SV=1;tr|B2RCN8|B2RCN8_HUMAN cDNA, FLJ96179, highly similar to Homo sapiens glucocorticoid modulatory element binding protein 1 (				B1AT47	1.12292	15.2675	4.81038
2129	14831;29373;34123;39620	E5RJ52;A0A384NYL6;P53677;H0YBA0;E7ER80	AP-3 complex subunit mu-2	AP3M2	tr|E5RJ52|E5RJ52_HUMAN AP-3 complex subunit mu-2 (Fragment) OS=Homo sapiens OX=9606 GN=AP3M2 PE=1 SV=1;tr|A0A384NYL6|A0A384NYL6_HUMAN Epididymis secretory sperm binding protein OS=Homo sapiens OX=9606 PE=2 SV=1;sp|P53677|AP3M2_HUMAN AP-3 complex subunit mu	E5RJ52	33525	27236	29546	23174	30804	55245	54437	52551	53875	50223	37091	0			15.0329	14.7332	14.8507	14.5002	14.9108	15.7536	15.7323	15.6814	15.7173	15.6161	15.1788	E5RJ52	0.920866		E5RJ52	0.894554	15.2529	11.875	1.65996e-14	3.59099e-11	22.3735	tr|E5RJ52|E5RJ52_HUMAN AP-3 complex subunit mu-2 (Fragment) OS=Homo sapiens OX=9606 GN=AP3M2 PE=1 SV=1;tr|A0A384NYL6|A0A384NYL6_HUMAN Epididymis secretory sperm binding protein OS=Homo sapiens OX=9606 PE=2 SV=1;sp|P53677|AP3M2_HUMAN AP-3 complex subunit mu				E5RJ52	0.894554	15.2529	8.38325
1363	45963;56856	B7ZME9;A0A0A0MR42;K7ENP4;Q8TEP8;B3KSV4;Q9HCK3;K7ELX0;H0Y966	Centrosomal protein of 192 kDa	CEP192;KIAA1569	tr|B7ZME9|B7ZME9_HUMAN CEP192 protein OS=Homo sapiens OX=9606 GN=CEP192 PE=2 SV=1;tr|A0A0A0MR42|A0A0A0MR42_HUMAN Centrosomal protein of 192 kDa OS=Homo sapiens OX=9606 GN=CEP192 PE=1 SV=1;tr|K7ENP4|K7ENP4_HUMAN Centrosomal protein of 192 kDa (Fragment) OS=	B7ZME9	290240	239550	273780	273310	340090	486920	555040	523290	499600	523560	504550	0			18.1469	17.87	18.0627	18.0602	18.3756	18.8933	19.0822	18.9973	18.9304	18.998	18.9446	B7ZME9	0.945319		B7ZME9	0.877192	18.5416	11.86	1.72533e-14	3.59099e-11	22.3383	tr|B7ZME9|B7ZME9_HUMAN CEP192 protein OS=Homo sapiens OX=9606 GN=CEP192 PE=2 SV=1;tr|A0A0A0MR42|A0A0A0MR42_HUMAN Centrosomal protein of 192 kDa OS=Homo sapiens OX=9606 GN=CEP192 PE=1 SV=1;tr|K7ENP4|K7ENP4_HUMAN Centrosomal protein of 192 kDa (Fragment) OS=				B7ZME9	0.877192	18.5416	8.30368
5919	9504;23163	Q8N3S0;Q8TAA5	GrpE protein homolog;GrpE protein homolog 2, mitochondrial	DKFZp451C205;GRPEL2	tr|Q8N3S0|Q8N3S0_HUMAN GrpE protein homolog (Fragment) OS=Homo sapiens OX=9606 GN=DKFZp451C205 PE=2 SV=1;sp|Q8TAA5|GRPE2_HUMAN GrpE protein homolog 2, mitochondrial OS=Homo sapiens OX=9606 GN=GRPEL2 PE=1 SV=1	Q8N3S0	108590	93977	80049	68719	92969	149480	150920	126420	167210	172420	99318	0			16.7285	16.52	16.2886	16.0684	16.5045	17.1896	17.2034	16.9479	17.3513	17.3956	16.5998	Q8N3S0	0.816156		Q8N3S0	0.795542	16.8198	9.03767	4.2567e-11	4.4298e-08	15.1046	tr|Q8N3S0|Q8N3S0_HUMAN GrpE protein homolog (Fragment) OS=Homo sapiens OX=9606 GN=DKFZp451C205 PE=2 SV=1;sp|Q8TAA5|GRPE2_HUMAN GrpE protein homolog 2, mitochondrial OS=Homo sapiens OX=9606 GN=GRPEL2 PE=1 SV=1				Q8N3S0	0.795542	16.8198	6.0495
741	27185;46528;52540	E9PGW7;Q5T8T7;E7EN96;Q5T8T8;A0A024R8C5;Q15528;Q5T8T6	Mediator of RNA polymerase II transcription subunit 22	MED22;SURF5	tr|E9PGW7|E9PGW7_HUMAN Mediator of RNA polymerase II transcription subunit 22 (Fragment) OS=Homo sapiens OX=9606 GN=MED22 PE=1 SV=1;tr|Q5T8T7|Q5T8T7_HUMAN Mediator complex subunit 22 OS=Homo sapiens OX=9606 GN=MED22 PE=1 SV=1;tr|E7EN96|E7EN96_HUMAN Mediato	E9PGW7	66739	59561	66187	47532	58646	62270	156980	95683	71496	162750	130780	0			16.0262	15.8621	16.0143	15.5366	15.8398	15.9262	17.2602	16.546	16.1256	17.3123	16.9968	E9PGW7	0.774265		E9PGW7	0.778274	16.2449	5.23025	6.08701e-06	0.00074524	3.83637	tr|E9PGW7|E9PGW7_HUMAN Mediator of RNA polymerase II transcription subunit 22 (Fragment) OS=Homo sapiens OX=9606 GN=MED22 PE=1 SV=1;tr|Q5T8T7|Q5T8T7_HUMAN Mediator complex subunit 22 OS=Homo sapiens OX=9606 GN=MED22 PE=1 SV=1;tr|E7EN96|E7EN96_HUMAN Mediato				E9PGW7	0.778274	16.2449	3.46258
2169	7949;14468;22619;24843;29188;41623;52000;54984	A0A3B3ITP4;Q495G5;Q8IVH4;Q495G6;D6RIS5;A0A0G3I9X5;A0A3B3IRG3	Methylmalonic aciduria type A protein, mitochondrial	MMAA	tr|A0A3B3ITP4|A0A3B3ITP4_HUMAN Methylmalonic aciduria type A protein, mitochondrial OS=Homo sapiens OX=9606 GN=MMAA PE=1 SV=1;tr|Q495G5|Q495G5_HUMAN MMAA protein OS=Homo sapiens OX=9606 GN=MMAA PE=1 SV=1;sp|Q8IVH4|MMAA_HUMAN Methylmalonic aciduria type A p	A0A3B3ITP4	267890	309030	116980	108380	305770	319100	370950	349160	325460	322830	380080	0			18.0313	18.2374	16.8359	16.7257	18.2221	18.2837	18.5009	18.4135	18.3121	18.3004	18.5359	A0A3B3ITP4	0.904541		A0A3B3ITP4	0.751638	17.9863	4.47871	6.41557e-05	0.00435422	1.6014	tr|A0A3B3ITP4|A0A3B3ITP4_HUMAN Methylmalonic aciduria type A protein, mitochondrial OS=Homo sapiens OX=9606 GN=MMAA PE=1 SV=1;tr|Q495G5|Q495G5_HUMAN MMAA protein OS=Homo sapiens OX=9606 GN=MMAA PE=1 SV=1;sp|Q8IVH4|MMAA_HUMAN Methylmalonic aciduria type A p				A0A3B3ITP4	0.751638	17.9863	2.91139
2979	17768	B3KVV1;P07204	Thrombomodulin	THBD	tr|B3KVV1|B3KVV1_HUMAN cDNA FLJ41563 fis, clone CTONG1000341, highly similar to THROMBOMODULIN OS=Homo sapiens OX=9606 PE=2 SV=1;sp|P07204|TRBM_HUMAN Thrombomodulin OS=Homo sapiens OX=9606 GN=THBD PE=1 SV=2	B3KVV1	1087200	1021000	895170	840090	978320	1487300	1677900	1587400	1440300	1633400	614730	0			20.0522	19.9615	19.7718	19.6802	19.9	20.5043	20.6782	20.5982	20.4579	20.6395	19.2296	B3KVV1	0.709188		B3KVV1	0.702484	20.2244	9.80582	4.58807e-12	5.72958e-09	17.1895	tr|B3KVV1|B3KVV1_HUMAN cDNA FLJ41563 fis, clone CTONG1000341, highly similar to THROMBOMODULIN OS=Homo sapiens OX=9606 PE=2 SV=1;sp|P07204|TRBM_HUMAN Thrombomodulin OS=Homo sapiens OX=9606 GN=THBD PE=1 SV=2				B3KVV1	0.702484	20.2244	6.13418
2469	424;5036;32104;35811;61154	A8K575;B3KNN8		STARD7	tr|A8K575|A8K575_HUMAN cDNA FLJ76190, highly similar to Homo sapiens START domain containing 7 (STARD7), transcript variant 1, mRNA OS=Homo sapiens OX=9606 PE=2 SV=1;tr|B3KNN8|B3KNN8_HUMAN cDNA FLJ30053 fis, clone ADRGL1000144, highly similar to StAR-relat	A8K575	67841	52787	59253	49267	58829	66234	126500	86011	86642	110290	59779	0			16.0499	15.6879	15.8546	15.5883	15.8442	16.0153	16.9488	16.3922	16.4028	16.7509	15.8674	A8K575	0.70683		A8K575	0.697016	16.1535	6.79876	4.11276e-08	1.71201e-05	8.59743	tr|A8K575|A8K575_HUMAN cDNA FLJ76190, highly similar to Homo sapiens START domain containing 7 (STARD7), transcript variant 1, mRNA OS=Homo sapiens OX=9606 PE=2 SV=1;tr|B3KNN8|B3KNN8_HUMAN cDNA FLJ30053 fis, clone ADRGL1000144, highly similar to StAR-relat				A8K575	0.697016	16.1535	4.2331
6357	2005;2891;11756;25716;42566;49812;64120	Q9BU89	Deoxyhypusine hydroxylase	DOHH	sp|Q9BU89|DOHH_HUMAN Deoxyhypusine hydroxylase OS=Homo sapiens OX=9606 GN=DOHH PE=1 SV=1	Q9BU89	2888800	4474100	1374900	1270800	4155900	3522800	4745000	3866700	3961800	3846100	4196700	0			21.462	22.0932	20.3909	20.2773	21.9867	21.7483	22.178	21.8827	21.9177	21.875	22.0008	Q9BU89	0.864471		Q9BU89	0.678296	21.5812	3.59602	0.000899105	0.0190781	-0.878045	sp|Q9BU89|DOHH_HUMAN Deoxyhypusine hydroxylase OS=Homo sapiens OX=9606 GN=DOHH PE=1 SV=1				Q9BU89	0.678296	21.5812	2.20153
3760	1262;32452	F5GZZ0;S4R3T5;F5H5X2;Q6NS38	Alpha-ketoglutarate-dependent dioxygenase alkB homolog 2	ALKBH2	tr|F5GZZ0|F5GZZ0_HUMAN DNA oxidative demethylase ALKBH2 (Fragment) OS=Homo sapiens OX=9606 GN=ALKBH2 PE=1 SV=1;tr|S4R3T5|S4R3T5_HUMAN DNA oxidative demethylase ALKBH2 (Fragment) OS=Homo sapiens OX=9606 GN=ALKBH2 PE=1 SV=1;tr|F5H5X2|F5H5X2_HUMAN DNA oxidati	F5GZZ0	283340	220530	162840	225860	312590	332000	403770	367080	383720	339820	428230	0			18.1122	17.7506	17.3131	17.7851	18.2539	18.3408	18.6232	18.4857	18.5497	18.3744	18.708	F5GZZ0	0.734524		F5GZZ0	0.63179	18.1589	6.3362	1.7898e-07	5.58776e-05	7.19646	tr|F5GZZ0|F5GZZ0_HUMAN DNA oxidative demethylase ALKBH2 (Fragment) OS=Homo sapiens OX=9606 GN=ALKBH2 PE=1 SV=1;tr|S4R3T5|S4R3T5_HUMAN DNA oxidative demethylase ALKBH2 (Fragment) OS=Homo sapiens OX=9606 GN=ALKBH2 PE=1 SV=1;tr|F5H5X2|F5H5X2_HUMAN DNA oxidati				F5GZZ0	0.63179	18.1589	3.69824
1370	23964;26851	A0A0A0MRC4;A0A0A0MSK4;Q86YR5	G-protein-signaling modulator 1	GPSM1	tr|A0A0A0MRC4|A0A0A0MRC4_HUMAN G-protein-signaling modulator 1 OS=Homo sapiens OX=9606 GN=GPSM1 PE=1 SV=2;tr|A0A0A0MSK4|A0A0A0MSK4_HUMAN G-protein-signaling modulator 1 OS=Homo sapiens OX=9606 GN=GPSM1 PE=1 SV=1;sp|Q86YR5|GPSM1_HUMAN G-protein-signaling mo	A0A0A0MRC4	52663	57214	55166	46729	57062	63901	109170	76256	67796	105010	69334	0			15.6845	15.8041	15.7515	15.512	15.8002	15.9635	16.7362	16.2186	16.0489	16.6802	16.0813	A0A0A0MRC4	0.641457		A0A0A0MRC4	0.619014	16.02	6.2662	2.23753e-07	5.8213e-05	6.98367	tr|A0A0A0MRC4|A0A0A0MRC4_HUMAN G-protein-signaling modulator 1 OS=Homo sapiens OX=9606 GN=GPSM1 PE=1 SV=2;tr|A0A0A0MSK4|A0A0A0MSK4_HUMAN G-protein-signaling modulator 1 OS=Homo sapiens OX=9606 GN=GPSM1 PE=1 SV=1;sp|Q86YR5|GPSM1_HUMAN G-protein-signaling mo				A0A0A0MRC4	0.619014	16.02	3.60353
2027	524;3409;32196;35423;37846;56343	A0A384MDR3;P02792;B1Q3B3;Q6S4P3;B1Q3B4;B1Q387;Q4FCH6	Ferritin light chain;Ferritin	FTL;FTL variant	tr|A0A384MDR3|A0A384MDR3_HUMAN Ferritin OS=Homo sapiens OX=9606 GN=FTL PE=2 SV=1;sp|P02792|FRIL_HUMAN Ferritin light chain OS=Homo sapiens OX=9606 GN=FTL PE=1 SV=2;tr|B1Q3B3|B1Q3B3_HUMAN Ferritin (Fragment) OS=Homo sapiens OX=9606 GN=FTL PE=3 SV=1;tr|Q6S4P	A0A384MDR3	13930000	14310000	11168000	10192000	13644000	18126000	19570000	18232000	19283000	18951000	14742000	0			23.7317	23.7705	23.4129	23.2809	23.7018	24.1116	24.2221	24.12	24.2008	24.1758	23.8134	A0A384MDR3	0.617051		A0A384MDR3	0.5865	23.8728	7.60735	3.24851e-09	2.25374e-06	11.0106	tr|A0A384MDR3|A0A384MDR3_HUMAN Ferritin OS=Homo sapiens OX=9606 GN=FTL PE=2 SV=1;sp|P02792|FRIL_HUMAN Ferritin light chain OS=Homo sapiens OX=9606 GN=FTL PE=1 SV=2;tr|B1Q3B3|B1Q3B3_HUMAN Ferritin (Fragment) OS=Homo sapiens OX=9606 GN=FTL PE=3 SV=1;tr|Q6S4P				A0A384MDR3	0.5865	23.8728	4.19559
4077	41983	L0R599		CIRH1A	tr|L0R599|L0R599_HUMAN Alternative protein CIRH1A OS=Homo sapiens OX=9606 GN=CIRH1A PE=4 SV=1	L0R599	464550	399630	354790	324290	400440	571810	647000	571390	694650	438390	445420	0			18.8255	18.6083	18.4366	18.3069	18.6112	19.1252	19.3034	19.1241	19.4059	18.7419	18.7648	L0R599	0.595775		L0R599	0.582394	18.8489	6.46926	1.17132e-07	4.30218e-05	7.6005	tr|L0R599|L0R599_HUMAN Alternative protein CIRH1A OS=Homo sapiens OX=9606 GN=CIRH1A PE=4 SV=1				L0R599	0.582394	18.8489	3.54746
1736	793;10333;10334;14887;20319;20986;25955;26926;28206;43178;43344;50653;55888;56198;57034;58717;59921;66601	A0A140VJP5;P31153;B4DEX8;B4E1K2;B4DN74;B4DFQ8	S-adenosylmethionine synthase isoform type-2;S-adenosylmethionine synthase	MAT2A	tr|A0A140VJP5|A0A140VJP5_HUMAN S-adenosylmethionine synthase OS=Homo sapiens OX=9606 PE=2 SV=1;sp|P31153|METK2_HUMAN S-adenosylmethionine synthase isoform type-2 OS=Homo sapiens OX=9606 GN=MAT2A PE=1 SV=1;tr|B4DEX8|B4DEX8_HUMAN S-adenosylmethionine synthas	A0A140VJP5	55953000	51459000	48855000	45852000	53054000	70710000	80047000	76370000	76079000	73854000	61401000	0			25.7377	25.6169	25.542	25.4505	25.661	26.0754	26.2543	26.1865	26.181	26.1382	25.8718	A0A140VJP5	0.580305		A0A140VJP5	0.565468	25.8843	8.37785	3.0566e-10	2.38568e-07	13.248	tr|A0A140VJP5|A0A140VJP5_HUMAN S-adenosylmethionine synthase OS=Homo sapiens OX=9606 PE=2 SV=1;sp|P31153|METK2_HUMAN S-adenosylmethionine synthase isoform type-2 OS=Homo sapiens OX=9606 GN=MAT2A PE=1 SV=1;tr|B4DEX8|B4DEX8_HUMAN S-adenosylmethionine synthas				A0A140VJP5	0.565468	25.8843	4.48079
3633	173;28111	E5RIY0;E5RFT4;Q8N4L2;E5RJC2;E5RIP9	Type 2 phosphatidylinositol 4,5-bisphosphate 4-phosphatase	TMEM55A	tr|E5RIY0|E5RIY0_HUMAN Phosphatidylinositol-4,5-bisphosphate 4-phosphatase OS=Homo sapiens OX=9606 GN=PIP4P2 PE=1 SV=1;tr|E5RFT4|E5RFT4_HUMAN Phosphatidylinositol-4,5-bisphosphate 4-phosphatase (Fragment) OS=Homo sapiens OX=9606 GN=PIP4P2 PE=1 SV=8;sp|Q8N4	E5RIY0	123390	103220	68115	55083	76754	80443	144700	117350	121380	147190	88332	0			16.9129	16.6554	16.0557	15.7493	16.2279	16.2957	17.1427	16.8405	16.8892	17.1673	16.4306	E5RIY0	0.523758		E5RIY0	0.54683	16.5937	4.08904	0.000210423	0.00854647	0.481053	tr|E5RIY0|E5RIY0_HUMAN Phosphatidylinositol-4,5-bisphosphate 4-phosphatase OS=Homo sapiens OX=9606 GN=PIP4P2 PE=1 SV=1;tr|E5RFT4|E5RFT4_HUMAN Phosphatidylinositol-4,5-bisphosphate 4-phosphatase (Fragment) OS=Homo sapiens OX=9606 GN=PIP4P2 PE=1 SV=8;sp|Q8N4				E5RIY0	0.54683	16.5937	2.12214
4040	44945	Q8NI83;J9JIC5;Q9HAS0	Protein Njmu-R1	OK/SW-cl.19;C17orf75	tr|Q8NI83|Q8NI83_HUMAN OK/SW-CL.19 OS=Homo sapiens OX=9606 GN=OK/SW-cl.19 PE=2 SV=1;tr|J9JIC5|J9JIC5_HUMAN Protein Njmu-R1 OS=Homo sapiens OX=9606 GN=C17orf75 PE=1 SV=1;sp|Q9HAS0|NJMU_HUMAN Protein Njmu-R1 OS=Homo sapiens OX=9606 GN=C17orf75 PE=1 SV=2	Q8NI83	12600	9012.8	13286	20402	24667	31389	14639	20194	18708	28695	17376	0			13.6211	13.1378	13.6976	14.3164	14.5903	14.938	13.8375	14.3016	14.1914	14.8085	14.0848	Q8NI83	0.722169		Q8NI83	0.542758	14.144	3.35294	0.00179169	0.028539	-1.51742	tr|Q8NI83|Q8NI83_HUMAN OK/SW-CL.19 OS=Homo sapiens OX=9606 GN=OK/SW-cl.19 PE=2 SV=1;tr|J9JIC5|J9JIC5_HUMAN Protein Njmu-R1 OS=Homo sapiens OX=9606 GN=C17orf75 PE=1 SV=1;sp|Q9HAS0|NJMU_HUMAN Protein Njmu-R1 OS=Homo sapiens OX=9606 GN=C17orf75 PE=1 SV=2				Q8NI83	0.542758	14.144	1.72802
6560	54465	Q9HCD6	Protein TANC2	TANC2	sp|Q9HCD6|TANC2_HUMAN Protein TANC2 OS=Homo sapiens OX=9606 GN=TANC2 PE=1 SV=3	Q9HCD6	66776	56796	53789	61161	68329	81885	105060	82255	91218	86413	81144	0			16.027	15.7935	15.715	15.9003	16.0602	16.3213	16.6808	16.3278	16.477	16.399	16.3082	Q9HCD6	0.582224		Q9HCD6	0.541976	16.1702	7.19327	1.18447e-08	6.16318e-06	9.78184	sp|Q9HCD6|TANC2_HUMAN Protein TANC2 OS=Homo sapiens OX=9606 GN=TANC2 PE=1 SV=3				Q9HCD6	0.541976	16.1702	3.7022
4806	18198;24341;49595;52568;65434	P50747;A0A0C4DG27	Biotin--protein ligase;Biotin--[methylmalonyl-CoA-carboxytransferase] ligase;Biotin--[propionyl-CoA-carboxylase [ATP-hydrolyzing]] ligase;Biotin--[methylcrotonoyl-CoA-carboxylase] ligase;Biotin--[acetyl-CoA-carboxylase] ligase	HLCS	sp|P50747|BPL1_HUMAN Biotin--protein ligase OS=Homo sapiens OX=9606 GN=HLCS PE=1 SV=1	P50747	989740	1218100	586660	566010	1114900	1055800	1367200	1243000	1305500	1211000	1572900	0			19.9167	20.2162	19.1622	19.1105	20.0885	20.0099	20.3828	20.2454	20.3162	20.2078	20.585	P50747	0.631026		P50747	0.533606	19.9656	4.21525	0.000143698	0.00712103	0.840104	sp|P50747|BPL1_HUMAN Biotin--protein ligase OS=Homo sapiens OX=9606 GN=HLCS PE=1 SV=1				P50747	0.533606	19.9656	2.1374
1335	540	B8ZZF8;A0A090N8Y5;Q9Y4Y9	U6 snRNA-associated Sm-like protein LSm5	LSM5	tr|B8ZZF8|B8ZZF8_HUMAN U6 snRNA-associated Sm-like protein LSm5 OS=Homo sapiens OX=9606 GN=LSM5 PE=1 SV=1;tr|A0A090N8Y5|A0A090N8Y5_HUMAN U6 snRNA-associated Sm-like protein LSm5 OS=Homo sapiens OX=9606 GN=LSM5 PE=3 SV=1;sp|Q9Y4Y9|LSM5_HUMAN U6 snRNA-associ	B8ZZF8	359860	302210	315940	302940	326430	317730	682290	419600	367280	598110	471550	0			18.4571	18.2052	18.2693	18.2087	18.3164	18.2774	19.38	18.6787	18.4865	19.19	18.847	B8ZZF8	0.517482		B8ZZF8	0.511212	18.5469	4.43058	7.44088e-05	0.00469301	1.46124	tr|B8ZZF8|B8ZZF8_HUMAN U6 snRNA-associated Sm-like protein LSm5 OS=Homo sapiens OX=9606 GN=LSM5 PE=1 SV=1;tr|A0A090N8Y5|A0A090N8Y5_HUMAN U6 snRNA-associated Sm-like protein LSm5 OS=Homo sapiens OX=9606 GN=LSM5 PE=3 SV=1;sp|Q9Y4Y9|LSM5_HUMAN U6 snRNA-associ				B8ZZF8	0.511212	18.5469	2.15091
5983	14891;16782	Q8NEC7;D6RCC4;D6RCC9;D6R9W2	Glutathione S-transferase C-terminal domain-containing protein	GSTCD	sp|Q8NEC7|GSTCD_HUMAN Glutathione S-transferase C-terminal domain-containing protein OS=Homo sapiens OX=9606 GN=GSTCD PE=1 SV=2;tr|D6RCC4|D6RCC4_HUMAN Glutathione S-transferase C-terminal domain-containing protein (Fragment) OS=Homo sapiens OX=9606 GN=GSTC	Q8NEC7	105410	90045	89999	73873	68414	114690	130680	113200	116570	125920	87309	0			16.6856	16.4584	16.4576	16.1728	16.062	16.8074	16.9957	16.7885	16.8308	16.9422	16.4138	Q8NEC7	0.429317		Q8NEC7	0.505636	16.6201	6.14278	3.31768e-07	8.28623e-05	6.60822	sp|Q8NEC7|GSTCD_HUMAN Glutathione S-transferase C-terminal domain-containing protein OS=Homo sapiens OX=9606 GN=GSTCD PE=1 SV=2;tr|D6RCC4|D6RCC4_HUMAN Glutathione S-transferase C-terminal domain-containing protein (Fragment) OS=Homo sapiens OX=9606 GN=GSTC				Q8NEC7	0.505636	16.6201	2.94728
6086	2248;3966;20836;30449;55312;67338	Q92522	Histone H1x	H1FX	sp|Q92522|H1X_HUMAN Histone H1x OS=Homo sapiens OX=9606 GN=H1FX PE=1 SV=1	Q92522	10029000	8467800	8467300	7759700	8966700	11811000	12275000	12380000	13127000	12134000	7937300	0			23.2577	23.0136	23.0135	22.8876	23.0962	23.4936	23.5492	23.5615	23.646	23.5326	22.9202	Q92522	0.513518		Q92522	0.502902	23.3051	7.28215	8.96198e-09	5.08715e-06	10.0469	sp|Q92522|H1X_HUMAN Histone H1x OS=Homo sapiens OX=9606 GN=H1FX PE=1 SV=1				Q92522	0.502902	23.3051	3.47335
2281	7424;26605;26606;28576;35328;41803;43394;46102;63464	A4D0Z3;P84085;C9J1Z8;B4DLJ3	ADP-ribosylation factor 5	ARF5	tr|A4D0Z3|A4D0Z3_HUMAN ADP-ribosylation factor 5 OS=Homo sapiens OX=9606 GN=ARF5 PE=2 SV=1;sp|P84085|ARF5_HUMAN ADP-ribosylation factor 5 OS=Homo sapiens OX=9606 GN=ARF5 PE=1 SV=2;tr|C9J1Z8|C9J1Z8_HUMAN ADP-ribosylation factor 5 (Fragment) OS=Homo sapiens	A4D0Z3	22788000	20989000	20020000	18733000	21392000	28189000	30925000	30959000	29237000	27746000	24446000	0			24.4418	24.3231	24.2549	24.1591	24.3506	24.7486	24.8823	24.8839	24.8013	24.7258	24.5431	A4D0Z3	0.513636		A4D0Z3	0.502468	24.5571	7.44102	5.45253e-09	3.40456e-06	10.519	tr|A4D0Z3|A4D0Z3_HUMAN ADP-ribosylation factor 5 OS=Homo sapiens OX=9606 GN=ARF5 PE=2 SV=1;sp|P84085|ARF5_HUMAN ADP-ribosylation factor 5 OS=Homo sapiens OX=9606 GN=ARF5 PE=1 SV=2;tr|C9J1Z8|C9J1Z8_HUMAN ADP-ribosylation factor 5 (Fragment) OS=Homo sapiens				A4D0Z3	0.502468	24.5571	3.54576
5067	46737	Q7Z3L2;Q08999	Retinoblastoma-like protein 2	DKFZp781K2028;RBL2	tr|Q7Z3L2|Q7Z3L2_HUMAN Uncharacterized protein DKFZp781K2028 OS=Homo sapiens OX=9606 GN=DKFZp781K2028 PE=2 SV=1;sp|Q08999|RBL2_HUMAN Retinoblastoma-like protein 2 OS=Homo sapiens OX=9606 GN=RBL2 PE=1 SV=3	Q7Z3L2	14948	23606	23979	27960	35575	26375	38052	32607	44163	32463	30612	0			13.8677	14.5269	14.5495	14.7711	15.1186	14.6869	15.2157	14.9929	15.4306	14.9865	14.9018	Q7Z3L2	0.633727		Q7Z3L2	0.495766	14.8146	3.9592	0.000310359	0.0110736	0.116024	tr|Q7Z3L2|Q7Z3L2_HUMAN Uncharacterized protein DKFZp781K2028 OS=Homo sapiens OX=9606 GN=DKFZp781K2028 PE=2 SV=1;sp|Q08999|RBL2_HUMAN Retinoblastoma-like protein 2 OS=Homo sapiens OX=9606 GN=RBL2 PE=1 SV=3				Q7Z3L2	0.495766	14.8146	1.8586
1751	7110	I6L972;A0A140VJW0;B7Z7J1;Q86UX6	Serine/threonine-protein kinase 32C	STK32C	tr|I6L972|I6L972_HUMAN STK32C protein (Fragment) OS=Homo sapiens OX=9606 GN=STK32C PE=2 SV=1;tr|A0A140VJW0|A0A140VJW0_HUMAN Serine/threonine kinase 32C, isoform CRA_d OS=Homo sapiens OX=9606 GN=STK32C PE=2 SV=1;tr|B7Z7J1|B7Z7J1_HUMAN cDNA FLJ56265, highly	I6L972	530740	463220	418100	420650	504150	554900	758060	644780	718250	596600	549530	0			19.0176	18.8213	18.6735	18.6823	18.9435	19.0819	19.5319	19.2984	19.4541	19.1864	19.0678	I6L972	0.511879		I6L972	0.482918	19.0691	6.1028	3.76951e-07	8.71735e-05	6.48651	tr|I6L972|I6L972_HUMAN STK32C protein (Fragment) OS=Homo sapiens OX=9606 GN=STK32C PE=2 SV=1;tr|A0A140VJW0|A0A140VJW0_HUMAN Serine/threonine kinase 32C, isoform CRA_d OS=Homo sapiens OX=9606 GN=STK32C PE=2 SV=1;tr|B7Z7J1|B7Z7J1_HUMAN cDNA FLJ56265, highly				I6L972	0.482918	19.0691	2.77874
3285	1110;1111;7618;9254;12171;12593;17411;17412;21609;23376;24218;24299;26570;27659;28284;34276;34693;37365;44423;47882;54098;59964;61819;65056;65647	B4E2Z3;F5GZI0;H0YFX4			tr|B4E2Z3|B4E2Z3_HUMAN cDNA FLJ54090, highly similar to 4F2 cell-surface antigen heavy chain OS=Homo sapiens OX=9606 PE=2 SV=1	B4E2Z3	3804400	3462900	2817700	2518700	3544600	3791500	4667700	4083800	4777500	5094300	2729200	0			21.8592	21.7235	21.4261	21.2643	21.7572	21.8543	22.1543	21.9615	22.1878	22.2804	21.3801	B4E2Z3	0.519391		B4E2Z3	0.48161	21.8469	5.48774	2.68499e-06	0.000408904	4.61553	tr|B4E2Z3|B4E2Z3_HUMAN cDNA FLJ54090, highly similar to 4F2 cell-surface antigen heavy chain OS=Homo sapiens OX=9606 PE=2 SV=1				B4E2Z3	0.48161	21.8469	2.49058
4621	24726;52248	P27449	V-type proton ATPase 16 kDa proteolipid subunit	ATP6V0C	sp|P27449|VATL_HUMAN V-type proton ATPase 16 kDa proteolipid subunit OS=Homo sapiens OX=9606 GN=ATP6V0C PE=1 SV=1	P27449	1746000	2263300	1393800	1245200	2149500	2413600	2689000	2296800	2231100	2344400	1891800	0			20.7356	21.11	20.4106	20.2479	21.0356	21.2028	21.3586	21.1312	21.0893	21.1608	20.8513	P27449	0.562498		P27449	0.480592	20.9482	4.76337	2.65003e-05	0.00239809	2.43881	sp|P27449|VATL_HUMAN V-type proton ATPase 16 kDa proteolipid subunit OS=Homo sapiens OX=9606 GN=ATP6V0C PE=1 SV=1				P27449	0.480592	20.9482	2.15631
1546	19146;41341;61302	P69905;A0A1S5UZ39;A0A1K0GXZ1;A0A0K2BMD8;I1VZV6;D1MGQ2;A0A385HW02;A0A385HVY8;A0A385HW21;A0A385HW63;A0A385HW00;G3V1N2;A0A385HVZ2;A0A2R8Y7C0;V9H1D9;Q9BX83;Q4ZGM8;E9M4D4;U6A216;U3PXP0;U6A493;E1B2D1;Q9NQT3;Q86YQ1;Q6J1Z9;Q86YQ4;Q86YL2;P78461;Q86YQ5;Q7Z7B4;U6A3P2	Hemoglobin subunit alpha	HBA1;HBA2	sp|P69905|HBA_HUMAN Hemoglobin subunit alpha OS=Homo sapiens OX=9606 GN=HBA1 PE=1 SV=2;tr|A0A1S5UZ39|A0A1S5UZ39_HUMAN Hemoglobin subunit alpha OS=Homo sapiens OX=9606 GN=HBA2 PE=2 SV=1;tr|A0A1K0GXZ1|A0A1K0GXZ1_HUMAN Globin C1 OS=Homo sapiens OX=9606 GN=GLN	P69905	2504500	2059100	2038400	2051900	2350500	5585100	4095800	2225400	2460500	2112700	2066800	0			21.2561	20.9736	20.959	20.9685	21.1645	22.4132	21.9657	21.0856	21.2305	21.0107	20.979	P69905	0.501832		P69905	0.476784	21.3027	3.34239	0.00184527	0.0289494	-1.54464	sp|P69905|HBA_HUMAN Hemoglobin subunit alpha OS=Homo sapiens OX=9606 GN=HBA1 PE=1 SV=2;tr|A0A1S5UZ39|A0A1S5UZ39_HUMAN Hemoglobin subunit alpha OS=Homo sapiens OX=9606 GN=HBA2 PE=2 SV=1;tr|A0A1K0GXZ1|A0A1K0GXZ1_HUMAN Globin C1 OS=Homo sapiens OX=9606 GN=GLN				P69905	0.476784	21.3027	1.49844
5509	13538;39333;54650	Q5T4F4;A0A0S2Z5V0;A0A0S2Z627;B7Z6J9	Protrudin	ZFYVE27	sp|Q5T4F4|ZFY27_HUMAN Protrudin OS=Homo sapiens OX=9606 GN=ZFYVE27 PE=1 SV=1;tr|A0A0S2Z5V0|A0A0S2Z5V0_HUMAN Zinc finger FYVE domain containing 27 isoform 4 (Fragment) OS=Homo sapiens OX=9606 GN=ZFYVE27 PE=2 SV=1;tr|A0A0S2Z627|A0A0S2Z627_HUMAN Zinc finger F	Q5T4F4	1035300	1055100	960410	882280	1101500	1333700	1528400	1456700	1382700	1287100	1188000	0			19.9816	20.0089	19.8733	19.7509	20.071	20.347	20.5436	20.4743	20.3991	20.2957	20.1801	Q5T4F4	0.508237		Q5T4F4	0.474766	20.1745	6.75847	4.67289e-08	1.8236e-05	8.47586	sp|Q5T4F4|ZFY27_HUMAN Protrudin OS=Homo sapiens OX=9606 GN=ZFYVE27 PE=1 SV=1;tr|A0A0S2Z5V0|A0A0S2Z5V0_HUMAN Zinc finger FYVE domain containing 27 isoform 4 (Fragment) OS=Homo sapiens OX=9606 GN=ZFYVE27 PE=2 SV=1;tr|A0A0S2Z627|A0A0S2Z627_HUMAN Zinc finger F				Q5T4F4	0.474766	20.1745	3.01408
365	5559;7473;43995;61933	E9PMJ2;J3KP39;A0A024R3L8;Q9BPY3;E9PMW3;G3V179;E9PIM5	Protein FAM118B	FAM118B;FLJ21103	tr|E9PMJ2|E9PMJ2_HUMAN Protein FAM118B (Fragment) OS=Homo sapiens OX=9606 GN=FAM118B PE=1 SV=8;tr|J3KP39|J3KP39_HUMAN Protein FAM118B OS=Homo sapiens OX=9606 GN=FAM118B PE=1 SV=1;tr|A0A024R3L8|A0A024R3L8_HUMAN Uncharacterized protein OS=Homo sapiens OX=960	E9PMJ2	57010	47505	48412	44220	48182	49599	94386	60515	63827	79952	66317	0			15.7989	15.5358	15.5631	15.4324	15.5562	15.598	16.5263	15.885	15.9619	16.2869	16.0171	E9PMJ2	0.469055		E9PMJ2	0.474324	15.8144	4.74486	2.80778e-05	0.00245666	2.38397	tr|E9PMJ2|E9PMJ2_HUMAN Protein FAM118B (Fragment) OS=Homo sapiens OX=9606 GN=FAM118B PE=1 SV=8;tr|J3KP39|J3KP39_HUMAN Protein FAM118B OS=Homo sapiens OX=9606 GN=FAM118B PE=1 SV=1;tr|A0A024R3L8|A0A024R3L8_HUMAN Uncharacterized protein OS=Homo sapiens OX=960				E9PMJ2	0.474324	15.8144	2.11362
3412	13554;15171;17174;60239	B9EK46;Q9P2M7;H0Y4A8;A6PVU7	Cingulin	CGN	tr|B9EK46|B9EK46_HUMAN Cingulin OS=Homo sapiens OX=9606 GN=CGN PE=2 SV=1;sp|Q9P2M7|CING_HUMAN Cingulin OS=Homo sapiens OX=9606 GN=CGN PE=1 SV=2	B9EK46	215940	273220	169450	137210	144710	198020	247740	283100	284360	259560	195880	0			17.7203	18.0597	17.3705	17.066	17.1428	17.5953	17.9185	18.1109	18.1174	17.9857	17.5796	B9EK46	0.391431		B9EK46	0.473694	17.7087	4.17876	0.000160507	0.00746474	0.735888	tr|B9EK46|B9EK46_HUMAN Cingulin OS=Homo sapiens OX=9606 GN=CGN PE=2 SV=1;sp|Q9P2M7|CING_HUMAN Cingulin OS=Homo sapiens OX=9606 GN=CGN PE=1 SV=2				B9EK46	0.473694	17.7087	1.85836
3550	2606	D3DUE0;K7EM88;K7EQ49;Q8TB05	UBA-like domain-containing protein 1	FAM100A;UBALD1	tr|D3DUE0|D3DUE0_HUMAN Family with sequence similarity 100, member A, isoform CRA_a OS=Homo sapiens OX=9606 GN=UBALD1 PE=4 SV=1;tr|K7EM88|K7EM88_HUMAN UBA-like domain-containing protein 1 OS=Homo sapiens OX=9606 GN=UBALD1 PE=1 SV=1;tr|K7EQ49|K7EQ49_HUMAN U	D3DUE0	157380	181080	160600	146910	181510	222620	270370	226990	220870	207550	170210	0			17.2639	17.4663	17.2931	17.1646	17.4697	17.7642	18.0446	17.7923	17.7528	17.6631	17.377	D3DUE0	0.50644		D3DUE0	0.471894	17.5675	6.39098	1.50305e-07	4.9395e-05	7.36287	tr|D3DUE0|D3DUE0_HUMAN Family with sequence similarity 100, member A, isoform CRA_a OS=Homo sapiens OX=9606 GN=UBALD1 PE=4 SV=1;tr|K7EM88|K7EM88_HUMAN UBA-like domain-containing protein 1 OS=Homo sapiens OX=9606 GN=UBALD1 PE=1 SV=1;tr|K7EQ49|K7EQ49_HUMAN U				D3DUE0	0.471894	17.5675	2.82864
1203	5684	A0A087WTX3;B0QYQ2;J3KR25;B4DMM9;Q96RU7	Tribbles homolog 3	TRIB3	tr|A0A087WTX3|A0A087WTX3_HUMAN Tribbles homolog 3 (Fragment) OS=Homo sapiens OX=9606 GN=TRIB3 PE=1 SV=1;tr|B0QYQ2|B0QYQ2_HUMAN Tribbles homolog 3 (Fragment) OS=Homo sapiens OX=9606 GN=TRIB3 PE=1 SV=1;tr|J3KR25|J3KR25_HUMAN Tribbles homolog 3 OS=Homo sapien	A0A087WTX3	502970	481580	479770	421900	505600	637730	739430	665950	628810	641120	608280	0			18.9401	18.8774	18.872	18.6865	18.9476	19.2826	19.4961	19.3451	19.2623	19.2902	19.2144	A0A087WTX3	0.491225		A0A087WTX3	0.4705	19.1	6.85941	3.39413e-08	1.51378e-05	8.78027	tr|A0A087WTX3|A0A087WTX3_HUMAN Tribbles homolog 3 (Fragment) OS=Homo sapiens OX=9606 GN=TRIB3 PE=1 SV=1;tr|B0QYQ2|B0QYQ2_HUMAN Tribbles homolog 3 (Fragment) OS=Homo sapiens OX=9606 GN=TRIB3 PE=1 SV=1;tr|J3KR25|J3KR25_HUMAN Tribbles homolog 3 OS=Homo sapien				A0A087WTX3	0.4705	19.1	3.02464
508	7860;23910;62183	A0A024R5J4;Q8TE77;E9PIT5;A0A087WWG1;C9JUG3;A0A024R5C3	Protein phosphatase Slingshot homolog 3	SSH3	tr|A0A024R5J4|A0A024R5J4_HUMAN Slingshot homolog 3 (Drosophila), isoform CRA_f OS=Homo sapiens OX=9606 GN=SSH3 PE=4 SV=1;sp|Q8TE77|SSH3_HUMAN Protein phosphatase Slingshot homolog 3 OS=Homo sapiens OX=9606 GN=SSH3 PE=1 SV=2;tr|E9PIT5|E9PIT5_HUMAN Protein p	A0A024R5J4	546770	709060	377720	335870	632250	637760	747930	662370	714300	702990	506850	0			19.0606	19.4355	18.527	18.3575	19.2701	19.2827	19.5125	19.3373	19.4462	19.4231	18.9512	A0A024R5J4	0.555201		A0A024R5J4	0.470204	19.1653	4.08454	0.000213293	0.00854647	0.468313	tr|A0A024R5J4|A0A024R5J4_HUMAN Slingshot homolog 3 (Drosophila), isoform CRA_f OS=Homo sapiens OX=9606 GN=SSH3 PE=4 SV=1;sp|Q8TE77|SSH3_HUMAN Protein phosphatase Slingshot homolog 3 OS=Homo sapiens OX=9606 GN=SSH3 PE=1 SV=2;tr|E9PIT5|E9PIT5_HUMAN Protein p				A0A024R5J4	0.470204	19.1653	1.79963
6304	486;547;5361;28721;39279;39288;45492;55625;56394	Q99988;A0A0A0MTT8	Growth/differentiation factor 15	GDF15	sp|Q99988|GDF15_HUMAN Growth/differentiation factor 15 OS=Homo sapiens OX=9606 GN=GDF15 PE=1 SV=3	Q99988	1062300	945410	936370	889910	1079000	1342600	1455900	1348800	1313300	1322500	1415000	0			20.0188	19.8506	19.8367	19.7633	20.0413	20.3566	20.4735	20.3633	20.3248	20.3348	20.4324	Q99988	0.503246		Q99988	0.468462	20.1364	6.88423	3.13784e-08	1.50713e-05	8.85501	sp|Q99988|GDF15_HUMAN Growth/differentiation factor 15 OS=Homo sapiens OX=9606 GN=GDF15 PE=1 SV=3				Q99988	0.468462	20.1364	3.01884
6019	18711;25366;32271;38339	Q8TBP6	Solute carrier family 25 member 40	SLC25A40	sp|Q8TBP6|S2540_HUMAN Solute carrier family 25 member 40 OS=Homo sapiens OX=9606 GN=SLC25A40 PE=1 SV=1	Q8TBP6	388820	327870	310970	313470	415060	342770	670570	441260	454080	560570	550980	0			18.5687	18.3228	18.2464	18.258	18.663	18.3869	19.355	18.7513	18.7926	19.0965	19.0716	Q8TBP6	0.527488		Q8TBP6	0.46469	18.6441	4.44326	7.15602e-05	0.00455941	1.49813	sp|Q8TBP6|S2540_HUMAN Solute carrier family 25 member 40 OS=Homo sapiens OX=9606 GN=SLC25A40 PE=1 SV=1				Q8TBP6	0.46469	18.6441	1.92819
1011	34062;48392;62417;65589	P41247;A0A024RBU8;C9IZF6	Patatin-like phospholipase domain-containing protein 4	PNPLA4	sp|P41247|PLPL4_HUMAN Patatin-like phospholipase domain-containing protein 4 OS=Homo sapiens OX=9606 GN=PNPLA4 PE=2 SV=3;tr|A0A024RBU8|A0A024RBU8_HUMAN Patatin-like phospholipase domain containing 4, isoform CRA_b OS=Homo sapiens OX=9606 GN=PNPLA4 PE=4 SV=	P41247	41939	39960	26271	22185	40102	40535	59615	38233	50929	41590	39825	0			15.356	15.2863	14.6812	14.4373	15.2914	15.3069	15.8634	15.2225	15.6362	15.3439	15.2814	P41247	0.534403		P41247	0.464162	15.2425	3.90411	0.00036555	0.011888	-0.0374502	sp|P41247|PLPL4_HUMAN Patatin-like phospholipase domain-containing protein 4 OS=Homo sapiens OX=9606 GN=PNPLA4 PE=2 SV=3;tr|A0A024RBU8|A0A024RBU8_HUMAN Patatin-like phospholipase domain containing 4, isoform CRA_b OS=Homo sapiens OX=9606 GN=PNPLA4 PE=4 SV=				P41247	0.464162	15.2425	1.6917
4599	51007;56945	P24390;Q96H29;A0A024QZT7;M0R1Y2;P33947	ER lumen protein-retaining receptor 1;ER lumen protein-retaining receptor;ER lumen protein-retaining receptor 2	KDELR1;KDELR2	sp|P24390|ERD21_HUMAN ER lumen protein-retaining receptor 1 OS=Homo sapiens OX=9606 GN=KDELR1 PE=1 SV=1;tr|Q96H29|Q96H29_HUMAN ER lumen protein-retaining receptor OS=Homo sapiens OX=9606 PE=2 SV=1;tr|A0A024QZT7|A0A024QZT7_HUMAN ER lumen protein-retaining r	P24390	799930	971220	510970	448040	625970	797530	940290	901760	893080	915610	629930	0			19.6095	19.8894	18.9629	18.7733	19.2557	19.6052	19.8427	19.7824	19.7684	19.8044	19.2648	P24390	0.451847		P24390	0.462456	19.5294	4.08418	0.000213525	0.00854647	0.467294	sp|P24390|ERD21_HUMAN ER lumen protein-retaining receptor 1 OS=Homo sapiens OX=9606 GN=KDELR1 PE=1 SV=1;tr|Q96H29|Q96H29_HUMAN ER lumen protein-retaining receptor OS=Homo sapiens OX=9606 PE=2 SV=1;tr|A0A024QZT7|A0A024QZT7_HUMAN ER lumen protein-retaining r				P24390	0.462456	19.5294	1.76119
4016	6775;36855;55556	Q96HN9;Q1PBM3;J3KRN4;J3QRB6;Q99759;Q7Z4E6;Q96K88;Q6P084	Mitogen-activated protein kinase kinase kinase 3	MAP3K3	tr|Q96HN9|Q96HN9_HUMAN Uncharacterized protein (Fragment) OS=Homo sapiens OX=9606 PE=2 SV=1;tr|Q1PBM3|Q1PBM3_HUMAN Mitogen-activated protein kinase kinase kinase 3 variant 2 OS=Homo sapiens OX=9606 GN=MAP3K3 PE=2 SV=1;tr|J3KRN4|J3KRN4_HUMAN Mitogen-activat	Q96HN9	1217100	1048700	1054900	864820	1167300	1468000	1479200	1618000	1368800	1396200	1267200	0			20.215	20.0002	20.0087	19.722	20.1547	20.4854	20.4964	20.6258	20.3845	20.4131	20.2732	Q96HN9	0.494553		Q96HN9	0.4609	20.2506	6.0867	3.96832e-07	8.74114e-05	6.43752	tr|Q96HN9|Q96HN9_HUMAN Uncharacterized protein (Fragment) OS=Homo sapiens OX=9606 PE=2 SV=1;tr|Q1PBM3|Q1PBM3_HUMAN Mitogen-activated protein kinase kinase kinase 3 variant 2 OS=Homo sapiens OX=9606 GN=MAP3K3 PE=2 SV=1;tr|J3KRN4|J3KRN4_HUMAN Mitogen-activat				Q96HN9	0.4609	20.2506	2.61304
7062	5789;9769;64636	S4R341		NOLC1	tr|S4R341|S4R341_HUMAN Nucleolar and coiled-body phosphoprotein 1 OS=Homo sapiens OX=9606 GN=NOLC1 PE=1 SV=1	S4R341	20862	16231	14958	13517	19382	21315	27171	22755	19354	25483	13596	0			14.3486	13.9865	13.8686	13.7225	14.2424	14.3796	14.7298	14.4739	14.2403	14.6372	13.7309	S4R341	0.510627		S4R341	0.45845	14.2629	5.05445	1.0617e-05	0.0011236	3.30735	tr|S4R341|S4R341_HUMAN Nucleolar and coiled-body phosphoprotein 1 OS=Homo sapiens OX=9606 GN=NOLC1 PE=1 SV=1				S4R341	0.45845	14.2629	2.15447
6219	35658;47589;53416	Q96HV5;H7BXL1;F8WDE2	Transmembrane protein 41A	TMEM41A	sp|Q96HV5|TM41A_HUMAN Transmembrane protein 41A OS=Homo sapiens OX=9606 GN=TMEM41A PE=1 SV=1;tr|H7BXL1|H7BXL1_HUMAN Transmembrane protein 41A OS=Homo sapiens OX=9606 GN=TMEM41A PE=1 SV=1;tr|F8WDE2|F8WDE2_HUMAN Transmembrane protein 41A OS=Homo sapiens OX=9	Q96HV5	684540	489690	486010	422340	573570	708380	684800	874560	681310	665830	812600	0			19.3848	18.9015	18.8906	18.6881	19.1296	19.4342	19.3853	19.7382	19.3779	19.3448	19.6322	Q96HV5	0.489843		Q96HV5	0.45717	19.2275	5.15641	7.69143e-06	0.000873188	3.61383	sp|Q96HV5|TM41A_HUMAN Transmembrane protein 41A OS=Homo sapiens OX=9606 GN=TMEM41A PE=1 SV=1;tr|H7BXL1|H7BXL1_HUMAN Transmembrane protein 41A OS=Homo sapiens OX=9606 GN=TMEM41A PE=1 SV=1;tr|F8WDE2|F8WDE2_HUMAN Transmembrane protein 41A OS=Homo sapiens OX=9				Q96HV5	0.45717	19.2275	2.18965
4786	7792;11096;13059;13896;17599;19099;21001;22033;22766;30271;31004;31058;31712;34083;36891;46445;51074;57214;62160;65739;66692	Q53HA4;Q5T5C7;P49591;Q0VGA5	Serine--tRNA ligase, cytoplasmic	SARS	tr|Q53HA4|Q53HA4_HUMAN Seryl-tRNA synthetase variant (Fragment) OS=Homo sapiens OX=9606 PE=2 SV=1;tr|Q5T5C7|Q5T5C7_HUMAN Serine--tRNA ligase, cytoplasmic OS=Homo sapiens OX=9606 GN=SARS PE=1 SV=1;sp|P49591|SYSC_HUMAN Serine--tRNA ligase, cytoplasmic OS=Hom	Q53HA4	26254000	23121000	22232000	20010000	23941000	28786000	33869000	32650000	31889000	30918000	25334000	0			24.646	24.4627	24.4061	24.2542	24.513	24.7789	25.0135	24.9606	24.9266	24.8819	24.5946	Q53HA4	0.47001		Q53HA4	0.455868	24.6843	6.41531	1.39093e-07	4.825e-05	7.43674	tr|Q53HA4|Q53HA4_HUMAN Seryl-tRNA synthetase variant (Fragment) OS=Homo sapiens OX=9606 PE=2 SV=1;tr|Q5T5C7|Q5T5C7_HUMAN Serine--tRNA ligase, cytoplasmic OS=Homo sapiens OX=9606 GN=SARS PE=1 SV=1;sp|P49591|SYSC_HUMAN Serine--tRNA ligase, cytoplasmic OS=Hom				Q53HA4	0.455868	24.6843	2.7137
3304	1207;5343;10065;28340;30352;32909;32910;39893;40651;42105;42132;49653;55065;57303;58088;59577;60917;61870;63010;64495;66685	B5MCX3;C9J2Q4;H7C2Y0;C9IY94;B5MD47;C9JQJ4;H7C310;H7C1T1		SEPTIN2	tr|B5MCX3|B5MCX3_HUMAN Septin 2 OS=Homo sapiens OX=9606 GN=SEPTIN2 PE=1 SV=1;tr|C9J2Q4|C9J2Q4_HUMAN Septin 2 (Fragment) OS=Homo sapiens OX=9606 GN=SEPTIN2 PE=1 SV=1;tr|H7C2Y0|H7C2Y0_HUMAN Septin 2 (Fragment) OS=Homo sapiens OX=9606 GN=SEPTIN2 PE=1 SV=1	B5MCX3	1434300	1218500	1225000	1098100	1228400	1323800	2154800	1561800	1523100	1965700	1877500	0			20.4519	20.2167	20.2244	20.0666	20.2283	20.3362	21.0391	20.5748	20.5386	20.9066	20.8404	B5MCX3	0.439188		B5MCX3	0.441494	20.4583	4.92185	1.61235e-05	0.00157304	2.91038	tr|B5MCX3|B5MCX3_HUMAN Septin 2 OS=Homo sapiens OX=9606 GN=SEPTIN2 PE=1 SV=1;tr|C9J2Q4|C9J2Q4_HUMAN Septin 2 (Fragment) OS=Homo sapiens OX=9606 GN=SEPTIN2 PE=1 SV=1;tr|H7C2Y0|H7C2Y0_HUMAN Septin 2 (Fragment) OS=Homo sapiens OX=9606 GN=SEPTIN2 PE=1 SV=1				B5MCX3	0.441494	20.4583	1.9895
5804	60861	Q86VE0	Myb-related transcription factor, partner of profilin	MYPOP	sp|Q86VE0|MYPOP_HUMAN Myb-related transcription factor, partner of profilin OS=Homo sapiens OX=9606 GN=MYPOP PE=1 SV=2	Q86VE0	19644	14156	14716	14936	14652	19712	28639	16422	25030	17800	12499	0			14.2618	13.7891	13.8451	13.8665	13.8388	14.2668	14.8057	14.0033	14.6114	14.1196	13.6095	Q86VE0	0.420721		Q86VE0	0.441086	14.1408	4.39021	8.42343e-05	0.00520751	1.34404	sp|Q86VE0|MYPOP_HUMAN Myb-related transcription factor, partner of profilin OS=Homo sapiens OX=9606 GN=MYPOP PE=1 SV=2				Q86VE0	0.441086	14.1408	1.77218
1502	1972;8954;13879;27368;31592;34281;35048;62361	Q5T321;A0A0D9SF28;F5GXV7;Q8NFP9;B3KVG9;B3KXQ8;Q6N008;B3KRF6;B7Z4S7;B7Z9H4	Neurobeachin	NBEA	tr|Q5T321|Q5T321_HUMAN Neurobeachin OS=Homo sapiens OX=9606 GN=NBEA PE=1 SV=1;tr|A0A0D9SF28|A0A0D9SF28_HUMAN Neurobeachin OS=Homo sapiens OX=9606 GN=NBEA PE=1 SV=1;tr|F5GXV7|F5GXV7_HUMAN Neurobeachin OS=Homo sapiens OX=9606 GN=NBEA PE=1 SV=2;sp|Q8NFP9|NBEA	Q5T321	3907700	4926100	2403600	2221900	4570300	4163100	5703500	4604700	4614400	4276700	6138100	0			21.8979	22.232	21.1968	21.0834	22.1239	21.9892	22.4434	22.1347	22.1377	22.0281	22.5494	Q5T321	0.544114		Q5T321	0.439844	21.9267	3.38743	0.00162668	0.0273038	-1.42812	tr|Q5T321|Q5T321_HUMAN Neurobeachin OS=Homo sapiens OX=9606 GN=NBEA PE=1 SV=1;tr|A0A0D9SF28|A0A0D9SF28_HUMAN Neurobeachin OS=Homo sapiens OX=9606 GN=NBEA PE=1 SV=1;tr|F5GXV7|F5GXV7_HUMAN Neurobeachin OS=Homo sapiens OX=9606 GN=NBEA PE=1 SV=2;sp|Q8NFP9|NBEA				Q5T321	0.439844	21.9267	1.36169
254	3337;5397;7569;12093;14873;18847;18860;20987;20988;21091;25121;28112;38084;44121;48958;54344	A0A024R222;B4DHQ3;Q9Y617;A0A024R280;B4DHX7;A9LS35	Phosphoserine aminotransferase	PSAT1	tr|A0A024R222|A0A024R222_HUMAN Phosphoserine aminotransferase OS=Homo sapiens OX=9606 GN=PSAT1 PE=3 SV=1;tr|B4DHQ3|B4DHQ3_HUMAN Phosphoserine aminotransferase OS=Homo sapiens OX=9606 PE=2 SV=1;sp|Q9Y617|SERC_HUMAN Phosphoserine aminotransferase OS=Homo sap	A0A024R222	21699000	19921000	18521000	17587000	20610000	24439000	28139000	27309000	27796000	25314000	25319000	0			24.3711	24.2478	24.1427	24.068	24.2968	24.5427	24.7461	24.7029	24.7284	24.5934	24.5937	A0A024R222	0.455286		A0A024R222	0.437398	24.444	6.30864	1.95419e-07	5.74799e-05	7.11271	tr|A0A024R222|A0A024R222_HUMAN Phosphoserine aminotransferase OS=Homo sapiens OX=9606 GN=PSAT1 PE=3 SV=1;tr|B4DHQ3|B4DHQ3_HUMAN Phosphoserine aminotransferase OS=Homo sapiens OX=9606 PE=2 SV=1;sp|Q9Y617|SERC_HUMAN Phosphoserine aminotransferase OS=Homo sap				A0A024R222	0.437398	24.444	2.51487
4045	29113	K7EIG9;Q96D70	R3H domain-containing protein 4	R3HDM4	tr|K7EIG9|K7EIG9_HUMAN R3H domain-containing protein 4 OS=Homo sapiens OX=9606 GN=R3HDM4 PE=1 SV=1;sp|Q96D70|R3HD4_HUMAN R3H domain-containing protein 4 OS=Homo sapiens OX=9606 GN=R3HDM4 PE=1 SV=3	K7EIG9	83443	87651	69374	75447	105720	138090	101990	80782	159720	99954	82756	0			16.3485	16.4195	16.0821	16.2032	16.6899	17.0753	16.6381	16.3017	17.2852	16.609	16.3366	K7EIG9	0.518528		K7EIG9	0.433214	16.5652	3.88158	0.000390762	0.0123228	-0.099941	tr|K7EIG9|K7EIG9_HUMAN R3H domain-containing protein 4 OS=Homo sapiens OX=9606 GN=R3HDM4 PE=1 SV=1;sp|Q96D70|R3HD4_HUMAN R3H domain-containing protein 4 OS=Homo sapiens OX=9606 GN=R3HDM4 PE=1 SV=3				K7EIG9	0.433214	16.5652	1.5248
3791	6223;36807	Q96KY9;F8VVI9;J3KTP3;Q9H159	Cadherin-19	CDH19	tr|Q96KY9|Q96KY9_HUMAN CDH19 protein OS=Homo sapiens OX=9606 PE=2 SV=1;tr|F8VVI9|F8VVI9_HUMAN Cadherin-19 (Fragment) OS=Homo sapiens OX=9606 GN=CDH19 PE=1 SV=1;tr|J3KTP3|J3KTP3_HUMAN Cadherin-19 OS=Homo sapiens OX=9606 GN=CDH19 PE=1 SV=1;sp|Q9H159|CAD19_HU	Q96KY9	565340	440880	469380	434160	478440	587800	649460	647730	683730	645070	781150	0			19.1088	18.75	18.8404	18.7279	18.868	19.165	19.3089	19.305	19.3831	19.2991	19.5752	Q96KY9	0.435445		Q96KY9	0.433202	19.0756	6.07957	4.05979e-07	8.74114e-05	6.4158	tr|Q96KY9|Q96KY9_HUMAN CDH19 protein OS=Homo sapiens OX=9606 PE=2 SV=1;tr|F8VVI9|F8VVI9_HUMAN Cadherin-19 (Fragment) OS=Homo sapiens OX=9606 GN=CDH19 PE=1 SV=1;tr|J3KTP3|J3KTP3_HUMAN Cadherin-19 OS=Homo sapiens OX=9606 GN=CDH19 PE=1 SV=1;sp|Q9H159|CAD19_HU				Q96KY9	0.433202	19.0756	2.38814
3331	19306	B7Z3K1;Q5BJH2	Transmembrane protein 128	TMEM128	tr|B7Z3K1|B7Z3K1_HUMAN cDNA FLJ51973 OS=Homo sapiens OX=9606 PE=2 SV=1;sp|Q5BJH2|TM128_HUMAN Transmembrane protein 128 OS=Homo sapiens OX=9606 GN=TMEM128 PE=1 SV=2	B7Z3K1	133280	99541	128090	87819	103130	118410	135080	126400	144510	234590	140320	0			17.0241	16.603	16.9668	16.4222	16.6541	16.8534	17.0435	16.9476	17.1408	17.8398	17.0984	B7Z3K1	0.410986		B7Z3K1	0.430974	16.9495	3.79935	0.000497913	0.0138176	-0.326742	tr|B7Z3K1|B7Z3K1_HUMAN cDNA FLJ51973 OS=Homo sapiens OX=9606 PE=2 SV=1;sp|Q5BJH2|TM128_HUMAN Transmembrane protein 128 OS=Homo sapiens OX=9606 GN=TMEM128 PE=1 SV=2				B7Z3K1	0.430974	16.9495	1.48051
6289	20645;37601;42705;43368;48454;59974;64059	Q99549;B3KS10;A0A0A0MT47	M-phase phosphoprotein 8	MPHOSPH8	sp|Q99549|MPP8_HUMAN M-phase phosphoprotein 8 OS=Homo sapiens OX=9606 GN=MPHOSPH8 PE=1 SV=2;tr|B3KS10|B3KS10_HUMAN cDNA FLJ35237 fis, clone PROST2001676, highly similar to M-PHASE PHOSPHOPROTEIN 8 OS=Homo sapiens OX=9606 PE=2 SV=1	Q99549	56895	69698	40887	45249	61705	75050	86994	66085	71761	63821	74575	0			15.796	16.0888	15.3194	15.4656	15.9131	16.1956	16.4086	16.012	16.1309	15.9617	16.1864	Q99549	0.474326		Q99549	0.425196	15.9292	4.40803	7.97495e-05	0.00497956	1.39573	sp|Q99549|MPP8_HUMAN M-phase phosphoprotein 8 OS=Homo sapiens OX=9606 GN=MPHOSPH8 PE=1 SV=2;tr|B3KS10|B3KS10_HUMAN cDNA FLJ35237 fis, clone PROST2001676, highly similar to M-PHASE PHOSPHOPROTEIN 8 OS=Homo sapiens OX=9606 PE=2 SV=1				Q99549	0.425196	15.9292	1.68114
4472	63814	Q59EY3;P08047	Transcription factor Sp1	SP1	tr|Q59EY3|Q59EY3_HUMAN Sp1 transcription factor variant (Fragment) OS=Homo sapiens OX=9606 PE=2 SV=1;sp|P08047|SP1_HUMAN Transcription factor Sp1 OS=Homo sapiens OX=9606 GN=SP1 PE=1 SV=3	Q59EY3	337220	324350	343430	287310	352080	403060	456310	468470	455890	418200	372990	0			18.3633	18.3072	18.3897	18.1322	18.4255	18.6206	18.7996	18.8376	18.7983	18.6738	18.5088	Q59EY3	0.447902		Q59EY3	0.422416	18.5348	6.1082	3.70505e-07	8.71735e-05	6.50295	tr|Q59EY3|Q59EY3_HUMAN Sp1 transcription factor variant (Fragment) OS=Homo sapiens OX=9606 PE=2 SV=1;sp|P08047|SP1_HUMAN Transcription factor Sp1 OS=Homo sapiens OX=9606 GN=SP1 PE=1 SV=3				Q59EY3	0.422416	18.5348	2.30468
2542	15019;20277;31845;35526;52913	Q9BTT6;A8K883;Q5T0G3	Leucine-rich repeat-containing protein 1	LRRC1	sp|Q9BTT6|LRRC1_HUMAN Leucine-rich repeat-containing protein 1 OS=Homo sapiens OX=9606 GN=LRRC1 PE=1 SV=1;tr|A8K883|A8K883_HUMAN cDNA FLJ77590, highly similar to Homo sapiens leucine rich repeat containing 1, mRNA OS=Homo sapiens OX=9606 PE=2 SV=1;tr|Q5T0G	Q9BTT6	885060	862570	595080	585450	833520	905550	1274000	868030	1088700	867340	946630	0			19.7554	19.7183	19.1827	19.1592	19.6689	19.7884	20.2809	19.7274	20.0542	19.7262	19.8524	Q9BTT6	0.46153		Q9BTT6	0.418538	19.7062	4.17909	0.000160345	0.00746474	0.736842	sp|Q9BTT6|LRRC1_HUMAN Leucine-rich repeat-containing protein 1 OS=Homo sapiens OX=9606 GN=LRRC1 PE=1 SV=1;tr|A8K883|A8K883_HUMAN cDNA FLJ77590, highly similar to Homo sapiens leucine rich repeat containing 1, mRNA OS=Homo sapiens OX=9606 PE=2 SV=1;tr|Q5T0G				Q9BTT6	0.418538	19.7062	1.5527
1259	51879	F8VV00;A0A087X203;G3V202;A0A087WY58;Q5JPB0;Q6ZN64;P51956	Serine/threonine-protein kinase Nek3	NEK3;DKFZp434B079	tr|F8VV00|F8VV00_HUMAN Serine/threonine-protein kinase Nek3 (Fragment) OS=Homo sapiens OX=9606 GN=NEK3 PE=1 SV=1;tr|A0A087X203|A0A087X203_HUMAN Serine/threonine-protein kinase Nek3 OS=Homo sapiens OX=9606 GN=NEK3 PE=1 SV=1;tr|G3V202|G3V202_HUMAN NIMA (Neve	F8VV00	1388300	1246300	1187500	1170000	1365800	1567500	1735300	1789800	1815100	1581900	1267800	0			20.4049	20.2492	20.1795	20.1581	20.3813	20.58	20.7267	20.7714	20.7916	20.5932	20.2739	F8VV00	0.444678		F8VV00	0.417998	20.4836	6.0236	4.85438e-07	0.000101036	6.24541	tr|F8VV00|F8VV00_HUMAN Serine/threonine-protein kinase Nek3 (Fragment) OS=Homo sapiens OX=9606 GN=NEK3 PE=1 SV=1;tr|A0A087X203|A0A087X203_HUMAN Serine/threonine-protein kinase Nek3 OS=Homo sapiens OX=9606 GN=NEK3 PE=1 SV=1;tr|G3V202|G3V202_HUMAN NIMA (Neve				F8VV00	0.417998	20.4836	2.23312
5783	8023;50712	Q86SZ2;G3V4C3;B0AZV9;G3V2H7	Trafficking protein particle complex subunit 6B	TRAPPC6B	sp|Q86SZ2|TPC6B_HUMAN Trafficking protein particle complex subunit 6B OS=Homo sapiens OX=9606 GN=TRAPPC6B PE=1 SV=1;tr|G3V4C3|G3V4C3_HUMAN Trafficking protein particle complex subunit 6B OS=Homo sapiens OX=9606 GN=TRAPPC6B PE=1 SV=1;tr|B0AZV9|B0AZV9_HUMAN	Q86SZ2	441110	534960	384640	306460	397950	495880	564360	578890	556990	521820	421710	0			18.7508	19.0291	18.5531	18.2253	18.6022	18.9196	19.1063	19.1429	19.0873	18.9932	18.6859	Q86SZ2	0.410275		Q86SZ2	0.417746	18.841	4.74202	2.83279e-05	0.00245666	2.37556	sp|Q86SZ2|TPC6B_HUMAN Trafficking protein particle complex subunit 6B OS=Homo sapiens OX=9606 GN=TRAPPC6B PE=1 SV=1;tr|G3V4C3|G3V4C3_HUMAN Trafficking protein particle complex subunit 6B OS=Homo sapiens OX=9606 GN=TRAPPC6B PE=1 SV=1;tr|B0AZV9|B0AZV9_HUMAN				Q86SZ2	0.417746	18.841	1.7562
474	14731;26456;27533;32066;32222;41386;45009;47806;59090	A0A024R525;P02794;Q6NZ44;B3KXC3;Q6NS36;G3V1D1;G3V192;Q8TD27;E9PPQ4;E9PRK8;E9PKY7;E9PQR3;E9PKM5;E9PK45;D3DPG2;A9JQE1	Ferritin;Ferritin heavy chain;Ferritin heavy chain, N-terminally processed	FTH1	tr|A0A024R525|A0A024R525_HUMAN Ferritin OS=Homo sapiens OX=9606 GN=FTH1 PE=3 SV=1;sp|P02794|FRIH_HUMAN Ferritin heavy chain OS=Homo sapiens OX=9606 GN=FTH1 PE=1 SV=2;tr|Q6NZ44|Q6NZ44_HUMAN Ferritin OS=Homo sapiens OX=9606 GN=FTH1 PE=1 SV=1;tr|B3KXC3|B3KXC3	A0A024R525	77303000	67077000	66486000	65161000	68932000	88727000	97661000	93124000	91246000	89385000	71391000	0			26.204	25.9993	25.9866	25.9575	26.0387	26.4029	26.5413	26.4727	26.4433	26.4135	26.0892	A0A024R525	0.417868		A0A024R525	0.417504	26.246	6.29745	2.02524e-07	5.74799e-05	7.07868	tr|A0A024R525|A0A024R525_HUMAN Ferritin OS=Homo sapiens OX=9606 GN=FTH1 PE=3 SV=1;sp|P02794|FRIH_HUMAN Ferritin heavy chain OS=Homo sapiens OX=9606 GN=FTH1 PE=1 SV=2;tr|Q6NZ44|Q6NZ44_HUMAN Ferritin OS=Homo sapiens OX=9606 GN=FTH1 PE=1 SV=1;tr|B3KXC3|B3KXC3				A0A024R525	0.417504	26.246	2.32995
176	38574	A0A024R107;H7C1V4;Q9HCH0	Nck-associated protein 5-like	hCG_1640179;NCKAP5L	tr|A0A024R107|A0A024R107_HUMAN HCG1640179, isoform CRA_a OS=Homo sapiens OX=9606 GN=hCG_1640179 PE=4 SV=1;tr|H7C1V4|H7C1V4_HUMAN Nck-associated protein 5-like (Fragment) OS=Homo sapiens OX=9606 GN=NCKAP5L PE=1 SV=1;sp|Q9HCH0|NCK5L_HUMAN Nck-associated prot	A0A024R107	395810	380450	355200	345270	439710	531870	473010	431580	553100	572440	292550	0			18.5944	18.5373	18.4383	18.3974	18.7462	19.0207	18.8515	18.7193	19.0772	19.1268	18.1583	A0A024R107	0.467226		A0A024R107	0.41636	18.7509	5.44769	3.05019e-06	0.000442916	4.49408	tr|A0A024R107|A0A024R107_HUMAN HCG1640179, isoform CRA_a OS=Homo sapiens OX=9606 GN=hCG_1640179 PE=4 SV=1;tr|H7C1V4|H7C1V4_HUMAN Nck-associated protein 5-like (Fragment) OS=Homo sapiens OX=9606 GN=NCKAP5L PE=1 SV=1;sp|Q9HCH0|NCK5L_HUMAN Nck-associated prot				A0A024R107	0.41636	18.7509	2.00613
5889	28359;39325;59547	Q8IZ21	Phosphatase and actin regulator 4	PHACTR4	sp|Q8IZ21|PHAR4_HUMAN Phosphatase and actin regulator 4 OS=Homo sapiens OX=9606 GN=PHACTR4 PE=1 SV=1	Q8IZ21	1485800	1283300	1275200	1194500	1348900	1596400	1482400	1417600	3492600	1403200	1442300	0			20.5028	20.2914	20.2823	20.188	20.3634	20.6064	20.4995	20.435	21.7359	20.4203	20.4599	Q8IZ21	0.423289		Q8IZ21	0.413844	20.5325	3.1348	0.00326772	0.0386433	-2.07046	sp|Q8IZ21|PHAR4_HUMAN Phosphatase and actin regulator 4 OS=Homo sapiens OX=9606 GN=PHACTR4 PE=1 SV=1				Q8IZ21	0.413844	20.5325	1.14236
2161	54241	A0A3B3IT67;A0A3B3IU67;Q6NT16	MFS-type transporter SLC18B1	SLC18B1	tr|A0A3B3IT67|A0A3B3IT67_HUMAN MFS-type transporter SLC18B1 OS=Homo sapiens OX=9606 GN=SLC18B1 PE=1 SV=1;tr|A0A3B3IU67|A0A3B3IU67_HUMAN MFS-type transporter SLC18B1 OS=Homo sapiens OX=9606 GN=SLC18B1 PE=1 SV=1;sp|Q6NT16|S18B1_HUMAN MFS-type transporter SLC	A0A3B3IT67	610100	692210	427110	360460	677010	628490	787390	703370	694570	758080	767270	0			19.2187	19.4008	18.7042	18.4595	19.3688	19.2615	19.5867	19.4239	19.4058	19.532	19.5494	A0A3B3IT67	0.496167		A0A3B3IT67	0.411566	19.2362	3.76839	0.000545212	0.0144501	-0.411573	tr|A0A3B3IT67|A0A3B3IT67_HUMAN MFS-type transporter SLC18B1 OS=Homo sapiens OX=9606 GN=SLC18B1 PE=1 SV=1;tr|A0A3B3IU67|A0A3B3IU67_HUMAN MFS-type transporter SLC18B1 OS=Homo sapiens OX=9606 GN=SLC18B1 PE=1 SV=1;sp|Q6NT16|S18B1_HUMAN MFS-type transporter SLC				A0A3B3IT67	0.411566	19.2362	1.35999
6883	7219;29089;60437	Q9Y2Z2;H0YBI9;H0YB81	Protein MTO1 homolog, mitochondrial	MTO1	sp|Q9Y2Z2|MTO1_HUMAN Protein MTO1 homolog, mitochondrial OS=Homo sapiens OX=9606 GN=MTO1 PE=1 SV=2	Q9Y2Z2	135450	110590	114190	102470	133850	171220	189260	124350	174310	138040	105740	0			17.0474	16.7549	16.8011	16.6448	17.0303	17.3855	17.53	16.9241	17.4113	17.0747	16.6902	Q9Y2Z2	0.453069		Q9Y2Z2	0.409426	17.0604	4.62991	4.01706e-05	0.00309969	2.04452	sp|Q9Y2Z2|MTO1_HUMAN Protein MTO1 homolog, mitochondrial OS=Homo sapiens OX=9606 GN=MTO1 PE=1 SV=2				Q9Y2Z2	0.409426	17.0604	1.65544
6081	19175;22997;51105	Q8WZ82	Ovarian cancer-associated gene 2 protein	OVCA2	sp|Q8WZ82|OVCA2_HUMAN Esterase OVCA2 OS=Homo sapiens OX=9606 GN=OVCA2 PE=1 SV=1	Q8WZ82	2135600	1988600	1872400	1774300	2159500	2403700	2771100	2574700	2669000	2682700	2025200	0			21.0262	20.9233	20.8365	20.7588	21.0423	21.1968	21.402	21.296	21.3479	21.3553	20.9496	Q8WZ82	0.43339		Q8WZ82	0.402178	21.1185	5.84384	8.62015e-07	0.000173626	5.69807	sp|Q8WZ82|OVCA2_HUMAN Esterase OVCA2 OS=Homo sapiens OX=9606 GN=OVCA2 PE=1 SV=1				Q8WZ82	0.402178	21.1185	2.02182
4872	8042;12328;16869;23377;25657;30255;30894;33766;48492;49169;52170;53282;60304;62589;63136	P57737;B3KSY4;B4DKU9	Coronin-7;Coronin	CORO7;hCG_1787779	sp|P57737|CORO7_HUMAN Coronin-7 OS=Homo sapiens OX=9606 GN=CORO7 PE=1 SV=2;tr|B3KSY4|B3KSY4_HUMAN Coronin OS=Homo sapiens OX=9606 GN=hCG_1787779 PE=2 SV=1;tr|B4DKU9|B4DKU9_HUMAN Coronin OS=Homo sapiens OX=9606 PE=2 SV=1	P57737	249230	211170	186780	176020	205240	253610	279200	270060	281970	263440	171600	0			17.9271	17.6881	17.511	17.4254	17.647	17.9522	18.0909	18.0429	18.1052	18.0071	17.3887	P57737	0.401797		P57737	0.399984	17.8397	5.36717	3.94079e-06	0.000559234	4.25016	sp|P57737|CORO7_HUMAN Coronin-7 OS=Homo sapiens OX=9606 GN=CORO7 PE=1 SV=2;tr|B3KSY4|B3KSY4_HUMAN Coronin OS=Homo sapiens OX=9606 GN=hCG_1787779 PE=2 SV=1;tr|B4DKU9|B4DKU9_HUMAN Coronin OS=Homo sapiens OX=9606 PE=2 SV=1				P57737	0.399984	17.8397	1.83765
5453	13581;55955;62747;66574	Q5HYI8;F8WF50;F8WDC7;C9JXM3;H7C533;F8WAX9	Rab-like protein 3	RABL3	sp|Q5HYI8|RABL3_HUMAN Rab-like protein 3 OS=Homo sapiens OX=9606 GN=RABL3 PE=1 SV=1;tr|F8WF50|F8WF50_HUMAN Rab-like protein 3 OS=Homo sapiens OX=9606 GN=RABL3 PE=1 SV=1;tr|F8WDC7|F8WDC7_HUMAN Rab-like protein 3 OS=Homo sapiens OX=9606 GN=RABL3 PE=1 SV=1;tr	Q5HYI8	2491900	2466500	2115600	1927700	2235000	2765900	3028500	3060500	3026000	2887500	3214500	0			21.2488	21.234	21.0126	20.8785	21.0918	21.3993	21.5302	21.5453	21.529	21.4614	21.6162	Q5HYI8	0.399555		Q5HYI8	0.399884	21.2931	5.6404	1.65037e-06	0.000286248	5.07914	sp|Q5HYI8|RABL3_HUMAN Rab-like protein 3 OS=Homo sapiens OX=9606 GN=RABL3 PE=1 SV=1;tr|F8WF50|F8WF50_HUMAN Rab-like protein 3 OS=Homo sapiens OX=9606 GN=RABL3 PE=1 SV=1;tr|F8WDC7|F8WDC7_HUMAN Rab-like protein 3 OS=Homo sapiens OX=9606 GN=RABL3 PE=1 SV=1;tr				Q5HYI8	0.399884	21.2931	1.93027
5715	20632;24589	Q75MR5;Q9P0U1;B5MD00;A0A087WZY2;A6NIV2	Mitochondrial import receptor subunit TOM7 homolog	TOM7;TOMM7	tr|Q75MR5|Q75MR5_HUMAN TOMM7 protein OS=Homo sapiens OX=9606 GN=TOM7 PE=1 SV=1;sp|Q9P0U1|TOM7_HUMAN Mitochondrial import receptor subunit TOM7 homolog OS=Homo sapiens OX=9606 GN=TOMM7 PE=1 SV=1;tr|B5MD00|B5MD00_HUMAN Mitochondrial import receptor subunit T	Q75MR5	30516	21244	26028	24105	26750	29123	45299	28912	39960	28532	18327	0			14.8973	14.3748	14.6678	14.557	14.7073	14.8299	15.4672	14.8194	15.2863	14.8003	14.1617	Q75MR5	0.416383		Q75MR5	0.399776	14.8407	4.1119	0.000196429	0.00818627	0.545786	tr|Q75MR5|Q75MR5_HUMAN TOMM7 protein OS=Homo sapiens OX=9606 GN=TOM7 PE=1 SV=1;sp|Q9P0U1|TOM7_HUMAN Mitochondrial import receptor subunit TOM7 homolog OS=Homo sapiens OX=9606 GN=TOMM7 PE=1 SV=1;tr|B5MD00|B5MD00_HUMAN Mitochondrial import receptor subunit T				Q75MR5	0.399776	14.8407	1.40646
2106	24574;58364	Q6ZSY0;B7Z3T9;A0A384NL67;Q8N653;B2R8T5	Leucine-zipper-like transcriptional regulator 1	LZTR1	tr|Q6ZSY0|Q6ZSY0_HUMAN cDNA FLJ45137 fis, clone BRAWH3038827, highly similar to Homo sapiens leucine-zipper-like transcriptional regulator, 1 (LZTR1) OS=Homo sapiens OX=9606 PE=2 SV=1;tr|B7Z3T9|B7Z3T9_HUMAN cDNA FLJ53345, highly similar to Leucine-zipper-l	Q6ZSY0	223380	214540	191600	193600	211990	243330	319320	271720	298570	238310	201120	0			17.7691	17.7109	17.5477	17.5627	17.6936	17.8926	18.2846	18.0518	18.1877	17.8625	17.6177	Q6ZSY0	0.408207		Q6ZSY0	0.399004	17.8563	5.31325	4.67733e-06	0.000624678	4.08705	tr|Q6ZSY0|Q6ZSY0_HUMAN cDNA FLJ45137 fis, clone BRAWH3038827, highly similar to Homo sapiens leucine-zipper-like transcriptional regulator, 1 (LZTR1) OS=Homo sapiens OX=9606 PE=2 SV=1;tr|B7Z3T9|B7Z3T9_HUMAN cDNA FLJ53345, highly similar to Leucine-zipper-l				Q6ZSY0	0.399004	17.8563	1.81061
4665	6635;24851	P32929	Cystathionine gamma-lyase	CTH	sp|P32929|CGL_HUMAN Cystathionine gamma-lyase OS=Homo sapiens OX=9606 GN=CTH PE=1 SV=3	P32929	125300	100710	102420	106120	112830	136140	145750	141410	143700	152010	115670	0			16.935	16.6198	16.6441	16.6953	16.7838	17.0547	17.1531	17.1095	17.1327	17.2138	16.8196	P32929	0.40919		P32929	0.39715	16.9342	5.79962	9.92761e-07	0.000187842	5.56348	sp|P32929|CGL_HUMAN Cystathionine gamma-lyase OS=Homo sapiens OX=9606 GN=CTH PE=1 SV=3				P32929	0.39715	16.9342	1.9585
3085	43167;66680	B4DJL3;Q9BUE0	Mediator of RNA polymerase II transcription subunit 18	MED18	tr|B4DJL3|B4DJL3_HUMAN Mediator of RNA polymerase II transcription subunit 18 OS=Homo sapiens OX=9606 GN=MED18 PE=2 SV=1;sp|Q9BUE0|MED18_HUMAN Mediator of RNA polymerase II transcription subunit 18 OS=Homo sapiens OX=9606 GN=MED18 PE=1 SV=1	B4DJL3	961770	1051800	876640	889230	1151600	1391600	1363600	1269800	1178300	1251900	961880	0			19.8753	20.0044	19.7416	19.7622	20.1352	20.4083	20.379	20.2762	20.1683	20.2557	19.8755	B4DJL3	0.451593		B4DJL3	0.39373	20.1006	5.35553	4.08937e-06	0.000567423	4.21493	tr|B4DJL3|B4DJL3_HUMAN Mediator of RNA polymerase II transcription subunit 18 OS=Homo sapiens OX=9606 GN=MED18 PE=2 SV=1;sp|Q9BUE0|MED18_HUMAN Mediator of RNA polymerase II transcription subunit 18 OS=Homo sapiens OX=9606 GN=MED18 PE=1 SV=1				B4DJL3	0.39373	20.1006	1.77773
3817	6557;33626	F8WA39;Q13613;H7BZJ1;H7C406;E9PPP8;Q8NEC6;B7Z3D5	Myotubularin-related protein 1	MTMR1	tr|F8WA39|F8WA39_HUMAN Myotubularin-related protein 1 OS=Homo sapiens OX=9606 GN=MTMR1 PE=1 SV=1;sp|Q13613|MTMR1_HUMAN Myotubularin-related protein 1 OS=Homo sapiens OX=9606 GN=MTMR1 PE=1 SV=4;tr|H7BZJ1|H7BZJ1_HUMAN Myotubularin-related protein 1 (Fragment	F8WA39	25399	30094	25547	24085	36563	36135	40171	39386	36658	32081	29481	0			14.6325	14.8772	14.6409	14.5558	15.1581	15.1411	15.2939	15.2654	15.1618	14.9694	14.8475	F8WA39	0.489732		F8WA39	0.393432	14.9696	4.6842	3.39274e-05	0.00286274	2.20457	tr|F8WA39|F8WA39_HUMAN Myotubularin-related protein 1 OS=Homo sapiens OX=9606 GN=MTMR1 PE=1 SV=1;sp|Q13613|MTMR1_HUMAN Myotubularin-related protein 1 OS=Homo sapiens OX=9606 GN=MTMR1 PE=1 SV=4;tr|H7BZJ1|H7BZJ1_HUMAN Myotubularin-related protein 1 (Fragment				F8WA39	0.393432	14.9696	1.55251
5621	12846;17636;46570;64706	Q6NSJ5;M0R2K8;M0R2D8;M0QZ48	Volume-regulated anion channel subunit LRRC8E	LRRC8E	sp|Q6NSJ5|LRC8E_HUMAN Volume-regulated anion channel subunit LRRC8E OS=Homo sapiens OX=9606 GN=LRRC8E PE=1 SV=2	Q6NSJ5	61430	53417	44299	48540	54315	56132	86393	60526	61550	81481	58276	0			15.9067	15.705	15.435	15.5669	15.7291	15.7765	16.3986	15.8853	15.9095	16.3142	15.8306	Q6NSJ5	0.40343		Q6NSJ5	0.388296	15.8627	4.2379	0.000134141	0.0068654	0.904965	sp|Q6NSJ5|LRC8E_HUMAN Volume-regulated anion channel subunit LRRC8E OS=Homo sapiens OX=9606 GN=LRRC8E PE=1 SV=2				Q6NSJ5	0.388296	15.8627	1.36712
4960	4366;8224;9410;11867;12795;13730;15469;19772;21476;22052;23953;24467;28661;39151;39152;47745;48385;58870	P78332;A8K6Q4;E9PGM9;F8WCA5;B3KSK6;B4DNY1;C9J250;C9JII0;C9JSL1;F8WF63	RNA-binding protein 6	RBM6	sp|P78332|RBM6_HUMAN RNA-binding protein 6 OS=Homo sapiens OX=9606 GN=RBM6 PE=1 SV=5;tr|A8K6Q4|A8K6Q4_HUMAN cDNA FLJ76888, highly similar to Homo sapiens RNA binding motif protein 6 (RBM6), mRNA OS=Homo sapiens OX=9606 PE=2 SV=1;tr|E9PGM9|E9PGM9_HUMAN RNA-	P78332	8206600	7047600	7035400	6366300	7352600	8918800	10272000	9581800	9351300	8874000	8195700	0			22.9684	22.7487	22.7462	22.602	22.8098	23.0884	23.2922	23.1919	23.1567	23.0812	22.9664	P78332	0.39576		P78332	0.38706	22.9685	5.52773	2.36379e-06	0.000378448	4.73688	sp|P78332|RBM6_HUMAN RNA-binding protein 6 OS=Homo sapiens OX=9606 GN=RBM6 PE=1 SV=5;tr|A8K6Q4|A8K6Q4_HUMAN cDNA FLJ76888, highly similar to Homo sapiens RNA binding motif protein 6 (RBM6), mRNA OS=Homo sapiens OX=9606 PE=2 SV=1;tr|E9PGM9|E9PGM9_HUMAN RNA-				P78332	0.38706	22.9685	1.77125
5273	17529;23710;31847;35578;38972;43433;51530;54971;55808	Q71UA6;Q15758;M0QXM4;M0QX44;M0R144	Amino acid transporter;Neutral amino acid transporter B(0)	SLC1A5	tr|Q71UA6|Q71UA6_HUMAN Amino acid transporter OS=Homo sapiens OX=9606 GN=SLC1A5 PE=2 SV=1;sp|Q15758|AAAT_HUMAN Neutral amino acid transporter B(0) OS=Homo sapiens OX=9606 GN=SLC1A5 PE=1 SV=2;tr|M0QXM4|M0QXM4_HUMAN Amino acid transporter OS=Homo sapiens OX=	Q71UA6	1121000	936220	925340	866270	1003000	1276900	1322200	1298800	1214900	1204000	1080400	0			20.0964	19.8365	19.8196	19.7245	19.9359	20.2842	20.3345	20.3087	20.2124	20.1994	20.0431	Q71UA6	0.398623		Q71UA6	0.385292	20.0752	5.53796	2.28795e-06	0.000375946	4.76794	tr|Q71UA6|Q71UA6_HUMAN Amino acid transporter OS=Homo sapiens OX=9606 GN=SLC1A5 PE=2 SV=1;sp|Q15758|AAAT_HUMAN Neutral amino acid transporter B(0) OS=Homo sapiens OX=9606 GN=SLC1A5 PE=1 SV=2;tr|M0QXM4|M0QXM4_HUMAN Amino acid transporter OS=Homo sapiens OX=				Q71UA6	0.385292	20.0752	1.75726
547	50762	H0YK36;J3KPT0;B4DYW8;B4DLA8;A8K4U2;A0A024R5Z6;Q6V1X1	Dipeptidyl peptidase 8	DPP8	tr|H0YK36|H0YK36_HUMAN Dipeptidyl peptidase 8 (Fragment) OS=Homo sapiens OX=9606 GN=DPP8 PE=1 SV=2;tr|J3KPT0|J3KPT0_HUMAN Dipeptidyl peptidase 8 OS=Homo sapiens OX=9606 GN=DPP8 PE=1 SV=1;tr|B4DYW8|B4DYW8_HUMAN cDNA FLJ60979, highly similar to Dipeptidyl pe	H0YK36	865950	871110	763290	807120	970330	1204200	1121900	1029500	1120400	1094800	870160	0			19.7239	19.7325	19.5419	19.6224	19.8881	20.1996	20.0975	19.9735	20.0956	20.0622	19.7309	H0YK36	0.430519		H0YK36	0.38393	19.8937	5.51484	2.46289e-06	0.000384457	4.69776	tr|H0YK36|H0YK36_HUMAN Dipeptidyl peptidase 8 (Fragment) OS=Homo sapiens OX=9606 GN=DPP8 PE=1 SV=2;tr|J3KPT0|J3KPT0_HUMAN Dipeptidyl peptidase 8 OS=Homo sapiens OX=9606 GN=DPP8 PE=1 SV=1;tr|B4DYW8|B4DYW8_HUMAN cDNA FLJ60979, highly similar to Dipeptidyl pe				H0YK36	0.38393	19.8937	1.73657
3470	6105	C9JSR1;Q8NCE2	Myotubularin-related protein 14	MTMR14	tr|C9JSR1|C9JSR1_HUMAN Myotubularin-related protein 14 OS=Homo sapiens OX=9606 GN=MTMR14 PE=1 SV=1;sp|Q8NCE2|MTMRE_HUMAN Myotubularin-related protein 14 OS=Homo sapiens OX=9606 GN=MTMR14 PE=1 SV=2	C9JSR1	43218	34718	39862	31874	38950	39700	69278	45935	53842	40752	30534	0			15.3993	15.0834	15.2827	14.9601	15.2493	15.2768	16.0801	15.4873	15.7164	15.3146	14.8981	C9JSR1	0.393668		C9JSR1	0.380078	15.385	3.87271	0.000401143	0.012402	-0.124501	tr|C9JSR1|C9JSR1_HUMAN Myotubularin-related protein 14 OS=Homo sapiens OX=9606 GN=MTMR14 PE=1 SV=1;sp|Q8NCE2|MTMRE_HUMAN Myotubularin-related protein 14 OS=Homo sapiens OX=9606 GN=MTMR14 PE=1 SV=2				C9JSR1	0.380078	15.385	1.19259
965	36213;49745	F8VRE8;A0A024RBE1;A0A024RBA1;Q96HH6;H0YHY1;H0YIS8;F8VS20	Transmembrane protein 19	TMEM19	tr|F8VRE8|F8VRE8_HUMAN Transmembrane protein 19 (Fragment) OS=Homo sapiens OX=9606 GN=TMEM19 PE=1 SV=1;tr|A0A024RBE1|A0A024RBE1_HUMAN Transmembrane protein 19, isoform CRA_b OS=Homo sapiens OX=9606 GN=TMEM19 PE=4 SV=1;tr|A0A024RBA1|A0A024RBA1_HUMAN Transme	F8VRE8	644880	677220	550350	578180	745060	968230	978270	772370	711060	741350	699060	0			19.2987	19.3693	19.07	19.1412	19.507	19.885	19.8999	19.5589	19.4396	19.4998	19.4151	F8VRE8	0.43687		F8VRE8	0.379424	19.4669	4.49546	6.09245e-05	0.00422681	1.65028	tr|F8VRE8|F8VRE8_HUMAN Transmembrane protein 19 (Fragment) OS=Homo sapiens OX=9606 GN=TMEM19 PE=1 SV=1;tr|A0A024RBE1|A0A024RBE1_HUMAN Transmembrane protein 19, isoform CRA_b OS=Homo sapiens OX=9606 GN=TMEM19 PE=4 SV=1;tr|A0A024RBA1|A0A024RBA1_HUMAN Transme				F8VRE8	0.379424	19.4669	1.379
6453	10557;20756;30157;32742;53376;56464;57838;59310	Q9H1H9;A0A1B0GUA8;Q9H6Z3;H0Y307;H0Y925;H0Y9Z7	Kinesin-like protein KIF13A	KIF13A	sp|Q9H1H9|KI13A_HUMAN Kinesin-like protein KIF13A OS=Homo sapiens OX=9606 GN=KIF13A PE=1 SV=2;tr|A0A1B0GUA8|A0A1B0GUA8_HUMAN Kinesin-like protein KIF13A OS=Homo sapiens OX=9606 GN=KIF13A PE=1 SV=1	Q9H1H9	1038300	811290	874550	838420	863150	1050500	1150800	1123300	1329600	1096000	1066000	0			19.9858	19.6299	19.7382	19.6773	19.7192	20.0026	20.1342	20.0993	20.3426	20.0638	20.0238	Q9H1H9	0.370723		Q9H1H9	0.37843	19.9393	5.17474	7.25787e-06	0.000855059	3.66901	sp|Q9H1H9|KI13A_HUMAN Kinesin-like protein KIF13A OS=Homo sapiens OX=9606 GN=KIF13A PE=1 SV=2;tr|A0A1B0GUA8|A0A1B0GUA8_HUMAN Kinesin-like protein KIF13A OS=Homo sapiens OX=9606 GN=KIF13A PE=1 SV=1				Q9H1H9	0.37843	19.9393	1.57795
2298	3630;8339;34955;48871	A4D1W8;Q96J80;Q9UM22	Mammalian ependymin-related protein 1	UCC1;MERP1;EPDR1	tr|A4D1W8|A4D1W8_HUMAN Ependymin related protein 1 (Zebrafish), isoform CRA_b OS=Homo sapiens OX=9606 GN=UCC1 PE=4 SV=1;tr|Q96J80|Q96J80_HUMAN Mammalian ependymin related protein 1 OS=Homo sapiens OX=9606 GN=MERP1 PE=2 SV=1;sp|Q9UM22|EPDR1_HUMAN Mammalian	A4D1W8	2109000	1940300	1932000	1788500	2481000	2142400	3486500	2843400	2983000	2050800	1723800	0			21.0081	20.8879	20.8817	20.7703	21.2425	21.0308	21.7334	21.4392	21.5083	20.9678	20.7172	A4D1W8	0.448896		A4D1W8	0.377796	21.147	3.85602	0.000421412	0.0125899	-0.170657	tr|A4D1W8|A4D1W8_HUMAN Ependymin related protein 1 (Zebrafish), isoform CRA_b OS=Homo sapiens OX=9606 GN=UCC1 PE=4 SV=1;tr|Q96J80|Q96J80_HUMAN Mammalian ependymin related protein 1 OS=Homo sapiens OX=9606 GN=MERP1 PE=2 SV=1;sp|Q9UM22|EPDR1_HUMAN Mammalian				A4D1W8	0.377796	21.147	1.17133
5299	3703;6753;15978;24028;28820;47602;48439;62743;66875	Q16740;M0R208;A0A2R8YEF5;M0QYV5	ATP-dependent Clp protease proteolytic subunit, mitochondrial;ATP-dependent Clp protease proteolytic subunit	CLPP	sp|Q16740|CLPP_HUMAN ATP-dependent Clp protease proteolytic subunit, mitochondrial OS=Homo sapiens OX=9606 GN=CLPP PE=1 SV=1;tr|M0R208|M0R208_HUMAN ATP-dependent Clp protease proteolytic subunit OS=Homo sapiens OX=9606 GN=CLPP PE=1 SV=1	Q16740	11288000	13613000	7955500	7161000	12984000	12868000	14677000	13090000	12693000	13285000	15386000	0			23.4283	23.6985	22.9235	22.7717	23.6302	23.6173	23.8071	23.642	23.5975	23.6633	23.8751	Q16740	0.459919		Q16740	0.374974	23.4779	3.5108	0.00114751	0.0220463	-1.10477	sp|Q16740|CLPP_HUMAN ATP-dependent Clp protease proteolytic subunit, mitochondrial OS=Homo sapiens OX=9606 GN=CLPP PE=1 SV=1;tr|M0R208|M0R208_HUMAN ATP-dependent Clp protease proteolytic subunit OS=Homo sapiens OX=9606 GN=CLPP PE=1 SV=1				Q16740	0.374974	23.4779	1.04807
5656	18562;35528	Q6PI78	Transmembrane protein 65	TMEM65	sp|Q6PI78|TMM65_HUMAN Transmembrane protein 65 OS=Homo sapiens OX=9606 GN=TMEM65 PE=1 SV=2	Q6PI78	2168700	2436300	1637400	1445800	2539000	2580900	2837000	2523000	2474100	2541500	2354700	0			21.0484	21.2163	20.643	20.4634	21.2758	21.2994	21.4359	21.2667	21.2385	21.2772	21.1671	Q6PI78	0.460793		Q6PI78	0.37418	21.1165	3.85428	0.000423582	0.0125945	-0.175467	sp|Q6PI78|TMM65_HUMAN Transmembrane protein 65 OS=Homo sapiens OX=9606 GN=TMEM65 PE=1 SV=2				Q6PI78	0.37418	21.1165	1.14487
6638	4500;4911;4970;9041;24406;36857;47912;50055;52332;57956;59990;61423;62364	Q9NUL7	Probable ATP-dependent RNA helicase DDX28	DDX28	sp|Q9NUL7|DDX28_HUMAN Probable ATP-dependent RNA helicase DDX28 OS=Homo sapiens OX=9606 GN=DDX28 PE=1 SV=2	Q9NUL7	1532200	1744700	1171100	1074200	1746700	1684400	1999600	1869000	1916800	1772900	2339200	0			20.5472	20.7345	20.1594	20.0348	20.7362	20.6838	20.9313	20.8338	20.8703	20.7577	21.1576	Q9NUL7	0.446379		Q9NUL7	0.372938	20.6289	4.00477	0.000270919	0.0101005	0.243589	sp|Q9NUL7|DDX28_HUMAN Probable ATP-dependent RNA helicase DDX28 OS=Homo sapiens OX=9606 GN=DDX28 PE=1 SV=2				Q9NUL7	0.372938	20.6289	1.18019
4057	18068;21097;32126;32781;43396;50785;57996;57997;57998	Q6IAV3;K7EM18;P41567;K7EQP2	Eukaryotic translation initiation factor 1	SUI1;EIF1	tr|Q6IAV3|Q6IAV3_HUMAN Eukaryotic translation initiation factor 1, isoform CRA_a OS=Homo sapiens OX=9606 GN=SUI1 PE=2 SV=1;tr|K7EM18|K7EM18_HUMAN Eukaryotic translation initiation factor 1 OS=Homo sapiens OX=9606 GN=EIF1 PE=1 SV=1;sp|P41567|EIF1_HUMAN Euka	Q6IAV3	13295000	12607000	12432000	12129000	13228000	16242000	18102000	16090000	16304000	15775000	11986000	0			23.6644	23.5877	23.5676	23.532	23.6571	23.9532	24.1096	23.9397	23.9587	23.9111	23.5148	Q6IAV3	0.386578		Q6IAV3	0.37274	23.7881	5.71043	1.31983e-06	0.000235458	5.2921	tr|Q6IAV3|Q6IAV3_HUMAN Eukaryotic translation initiation factor 1, isoform CRA_a OS=Homo sapiens OX=9606 GN=SUI1 PE=2 SV=1;tr|K7EM18|K7EM18_HUMAN Eukaryotic translation initiation factor 1 OS=Homo sapiens OX=9606 GN=EIF1 PE=1 SV=1;sp|P41567|EIF1_HUMAN Euka				Q6IAV3	0.37274	23.7881	1.68071
6811	11210;42663	Q9UKU7	Isobutyryl-CoA dehydrogenase, mitochondrial	ACAD8	sp|Q9UKU7|ACAD8_HUMAN Isobutyryl-CoA dehydrogenase, mitochondrial OS=Homo sapiens OX=9606 GN=ACAD8 PE=1 SV=1	Q9UKU7	472740	468790	389900	358700	437450	519130	566960	567500	551490	534990	437770	0			18.8507	18.8386	18.5727	18.4524	18.7388	18.9857	19.1129	19.1143	19.073	19.0292	18.7398	Q9UKU7	0.384396		Q9UKU7	0.372366	18.8768	5.14317	8.02078e-06	0.000894317	3.57395	sp|Q9UKU7|ACAD8_HUMAN Isobutyryl-CoA dehydrogenase, mitochondrial OS=Homo sapiens OX=9606 GN=ACAD8 PE=1 SV=1				Q9UKU7	0.372366	18.8768	1.5101
2204	53736	H9KV93;B3KU32;A0A494C0N4;A8KA77;Q7Z4L5	Tetratricopeptide repeat protein 21B	TTC21B	tr|H9KV93|H9KV93_HUMAN Tetratricopeptide repeat protein 21B (Fragment) OS=Homo sapiens OX=9606 GN=TTC21B PE=1 SV=1;tr|B3KU32|B3KU32_HUMAN cDNA FLJ39132 fis, clone NTONG2008365, highly similar to Homo sapiens tetratricopeptide repeat domain 21B (TTC21B), mR	H9KV93	77731	60809	65252	58479	60953	62134	106890	78069	68710	111700	115540	0			16.2462	15.892	15.9937	15.8356	15.8954	15.9231	16.7058	16.2525	16.0682	16.7693	16.818	H9KV93	0.351876		H9KV93	0.371172	16.1582	3.56026	0.000996312	0.0202637	-0.973523	tr|H9KV93|H9KV93_HUMAN Tetratricopeptide repeat protein 21B (Fragment) OS=Homo sapiens OX=9606 GN=TTC21B PE=1 SV=1;tr|B3KU32|B3KU32_HUMAN cDNA FLJ39132 fis, clone NTONG2008365, highly similar to Homo sapiens tetratricopeptide repeat domain 21B (TTC21B), mR				H9KV93	0.371172	16.1582	1.03725
3328	15896;23531	B7Z390;Q59GF2;Q13444	Disintegrin and metalloproteinase domain-containing protein 15	ADAM15	tr|B7Z390|B7Z390_HUMAN cDNA FLJ53336, highly similar to ADAM 15 OS=Homo sapiens OX=9606 PE=2 SV=1;tr|Q59GF2|Q59GF2_HUMAN ADAM15 isoform 6a variant (Fragment) OS=Homo sapiens OX=9606 PE=2 SV=1;sp|Q13444|ADA15_HUMAN Disintegrin and metalloproteinase domain-c	B7Z390	586850	599200	521960	535340	660520	720460	816810	744020	738660	723230	625930	0			19.1626	19.1927	18.9936	19.0301	19.3332	19.4586	19.6396	19.505	19.4946	19.4641	19.2556	B7Z390	0.417616		B7Z390	0.369918	19.3274	5.30496	4.80214e-06	0.000624678	4.06199	tr|B7Z390|B7Z390_HUMAN cDNA FLJ53336, highly similar to ADAM 15 OS=Homo sapiens OX=9606 PE=2 SV=1;tr|Q59GF2|Q59GF2_HUMAN ADAM15 isoform 6a variant (Fragment) OS=Homo sapiens OX=9606 PE=2 SV=1;sp|Q13444|ADA15_HUMAN Disintegrin and metalloproteinase domain-c				B7Z390	0.369918	19.3274	1.53281
3062	5971;8536;18145;22247;23588;26924;27123;28575;35512;36265;38815;43371;45631;53505;57689;60279;62371;62598;63466;64945	B4DI68			tr|B4DI68|B4DI68_HUMAN cDNA FLJ61268, highly similar to Peroxisomal multifunctional enzyme type 2 OS=Homo sapiens OX=9606 PE=2 SV=1	B4DI68	335640	395540	184390	186420	337250	297790	380910	368350	379740	348190	864370	0			18.3566	18.5935	17.4924	17.5082	18.3635	18.1839	18.5391	18.4907	18.5346	18.4095	19.7213	B4DI68	0.443929		B4DI68	0.368768	18.2472	2.91529	0.00586922	0.0470896	-2.60471	tr|B4DI68|B4DI68_HUMAN cDNA FLJ61268, highly similar to Peroxisomal multifunctional enzyme type 2 OS=Homo sapiens OX=9606 PE=2 SV=1				B4DI68	0.368768	18.2472	0.835876
929	2786;10606	A0A024RAT6;Q8WU10	Pyridine nucleotide-disulfide oxidoreductase domain-containing protein 1	FLJ22028;PYROXD1	tr|A0A024RAT6|A0A024RAT6_HUMAN Uncharacterized protein OS=Homo sapiens OX=9606 GN=FLJ22028 PE=4 SV=1;sp|Q8WU10|PYRD1_HUMAN Pyridine nucleotide-disulfide oxidoreductase domain-containing protein 1 OS=Homo sapiens OX=9606 GN=PYROXD1 PE=1 SV=1	A0A024RAT6	49748	51371	41200	38047	55659	54181	67732	60360	64247	56169	52327	0			15.6023	15.6487	15.3304	15.2155	15.7643	15.7255	16.0476	15.8813	15.9713	15.7775	15.6753	A0A024RAT6	0.431416		A0A024RAT6	0.368394	15.6964	4.47443	6.5008e-05	0.00436462	1.58892	tr|A0A024RAT6|A0A024RAT6_HUMAN Uncharacterized protein OS=Homo sapiens OX=9606 GN=FLJ22028 PE=4 SV=1;sp|Q8WU10|PYRD1_HUMAN Pyridine nucleotide-disulfide oxidoreductase domain-containing protein 1 OS=Homo sapiens OX=9606 GN=PYROXD1 PE=1 SV=1				A0A024RAT6	0.368394	15.6964	1.27967
6181	67411	Q96EH3	Mitochondrial assembly of ribosomal large subunit protein 1	MALSU1	sp|Q96EH3|MASU1_HUMAN Mitochondrial assembly of ribosomal large subunit protein 1 OS=Homo sapiens OX=9606 GN=MALSU1 PE=1 SV=1	Q96EH3	237860	266620	175810	175340	233070	243490	277240	284890	298150	282180	306440	0			17.8597	18.0244	17.4237	17.4198	17.8304	17.8935	18.0808	18.12	18.1857	18.1063	18.2252	Q96EH3	0.395342		Q96EH3	0.365644	17.8944	4.2283	0.000138113	0.00691717	0.877461	sp|Q96EH3|MASU1_HUMAN Mitochondrial assembly of ribosomal large subunit protein 1 OS=Homo sapiens OX=9606 GN=MALSU1 PE=1 SV=1				Q96EH3	0.365644	17.8944	1.18658
1888	62366	A0A1W2PR66;A0A1W2PQD6;A0A1W2PQ13;A0A1W2PQ60;A0A1W2PNY6;A0A1W2PPH4;A0A1W2PPG9;A0A1W2PPE6;A0A1W2PQH2;A0A1W2PNF0;A0A1W2PRT7;A0A1W2PSD1;A0A1W2PS45;A0A1W2PRN3;A0A1W2PS77;A0A1W2PQL8;A0A1W2PSA9;Q9Y2D2	UDP-N-acetylglucosamine transporter	SLC35A3	tr|A0A1W2PR66|A0A1W2PR66_HUMAN UDP-N-acetylglucosamine transporter OS=Homo sapiens OX=9606 GN=SLC35A3 PE=1 SV=1;tr|A0A1W2PQD6|A0A1W2PQD6_HUMAN Uncharacterized protein OS=Homo sapiens OX=9606 PE=1 SV=1;tr|A0A1W2PQ13|A0A1W2PQ13_HUMAN Uncharacterized protein	A0A1W2PR66	695260	629950	567000	520480	610680	714470	763130	799620	769560	833590	942670	0			19.4072	19.2649	19.113	18.9895	19.2201	19.4465	19.5416	19.609	19.5537	19.669	19.8464	A0A1W2PR66	0.370303		A0A1W2PR66	0.365018	19.3814	5.07121	1.00696e-05	0.00110307	3.35766	tr|A0A1W2PR66|A0A1W2PR66_HUMAN UDP-N-acetylglucosamine transporter OS=Homo sapiens OX=9606 GN=SLC35A3 PE=1 SV=1;tr|A0A1W2PQD6|A0A1W2PQD6_HUMAN Uncharacterized protein OS=Homo sapiens OX=9606 PE=1 SV=1;tr|A0A1W2PQ13|A0A1W2PQ13_HUMAN Uncharacterized protein				A0A1W2PR66	0.365018	19.3814	1.41686
19	26641;31001;46164	A0A024QYV5;Q9H875;E9PC43;B4DQF4	PRKR-interacting protein 1	PRKRIP1	tr|A0A024QYV5|A0A024QYV5_HUMAN PRKR interacting protein 1 (IL11 inducible), isoform CRA_a OS=Homo sapiens OX=9606 GN=PRKRIP1 PE=4 SV=1;sp|Q9H875|PKRI1_HUMAN PRKR-interacting protein 1 OS=Homo sapiens OX=9606 GN=PRKRIP1 PE=1 SV=1;tr|E9PC43|E9PC43_HUMAN PRKR	A0A024QYV5	1616600	1780900	1228400	1155300	1692000	1738500	2052200	1861100	1917400	1907300	1744900	0			20.6245	20.7642	20.2283	20.1398	20.6903	20.7294	20.9687	20.8277	20.8707	20.8631	20.7347	A0A024QYV5	0.412713		A0A024QYV5	0.362498	20.6707	4.18045	0.000159689	0.00746474	0.7407	tr|A0A024QYV5|A0A024QYV5_HUMAN PRKR interacting protein 1 (IL11 inducible), isoform CRA_a OS=Homo sapiens OX=9606 GN=PRKRIP1 PE=4 SV=1;sp|Q9H875|PKRI1_HUMAN PRKR-interacting protein 1 OS=Homo sapiens OX=9606 GN=PRKRIP1 PE=1 SV=1;tr|E9PC43|E9PC43_HUMAN PRKR				A0A024QYV5	0.362498	20.6707	1.14705
1922	2486;3792;3793;3934;6670;9347;22196;24828;28640;31553;42195;42717;45694;46978;57703;58703;62402;64035	O43175;A0A286YF22;A0A2C9F2M7;V9HW79;B3KSC3;A0A286YFA2;A0A286YFL2;Q9UMY2;Q8N5M8;A0A286YFM8;A0A286YF78;Q9UMY3;A0A286YFB2;A0A286YFC8;A0A286YER3;A0A286YF34;A0A286YFK5;A0A286YFE1;A0A286YFF3;Q96RV7;Q96RV5;Q96RV6;Q96RV9	D-3-phosphoglycerate dehydrogenase	PHGDH;HEL-S-113;PGDH3	sp|O43175|SERA_HUMAN D-3-phosphoglycerate dehydrogenase OS=Homo sapiens OX=9606 GN=PHGDH PE=1 SV=4;tr|A0A286YF22|A0A286YF22_HUMAN D-3-phosphoglycerate dehydrogenase OS=Homo sapiens OX=9606 GN=PHGDH PE=1 SV=1;tr|A0A2C9F2M7|A0A2C9F2M7_HUMAN D-3-phosphoglycer	O43175	59584000	54504000	51594000	47873000	57712000	66039000	72635000	70407000	68666000	69935000	54419000	0			25.8284	25.6999	25.6207	25.5127	25.7824	25.9768	26.1142	26.0692	26.0331	26.0595	25.6976	O43175	0.385136		O43175	0.361746	25.8697	5.31098	4.7112e-06	0.000624678	4.08019	sp|O43175|SERA_HUMAN D-3-phosphoglycerate dehydrogenase OS=Homo sapiens OX=9606 GN=PHGDH PE=1 SV=4;tr|A0A286YF22|A0A286YF22_HUMAN D-3-phosphoglycerate dehydrogenase OS=Homo sapiens OX=9606 GN=PHGDH PE=1 SV=1;tr|A0A2C9F2M7|A0A2C9F2M7_HUMAN D-3-phosphoglycer				O43175	0.361746	25.8697	1.44924
5142	6394;17633;18241;38354;51022;54351	Q13443;B4DDM8;F8WC54;A0AVL1;A0A0J9YY58	Disintegrin and metalloproteinase domain-containing protein 9	ADAM9	sp|Q13443|ADAM9_HUMAN Disintegrin and metalloproteinase domain-containing protein 9 OS=Homo sapiens OX=9606 GN=ADAM9 PE=1 SV=1;tr|B4DDM8|B4DDM8_HUMAN cDNA FLJ59176, highly similar to ADAM 9 OS=Homo sapiens OX=9606 PE=2 SV=1;tr|F8WC54|F8WC54_HUMAN Disintegr	Q13443	14868000	16827000	11739000	10158000	17373000	17095000	18457000	17982000	18694000	16970000	27167000	0			23.8257	24.0043	23.4848	23.2761	24.0503	24.0271	24.1377	24.1	24.1561	24.0165	24.6954	Q13443	0.439741		Q13443	0.359218	23.9079	3.85075	0.000428018	0.0126086	-0.185221	sp|Q13443|ADAM9_HUMAN Disintegrin and metalloproteinase domain-containing protein 9 OS=Homo sapiens OX=9606 GN=ADAM9 PE=1 SV=1;tr|B4DDM8|B4DDM8_HUMAN cDNA FLJ59176, highly similar to ADAM 9 OS=Homo sapiens OX=9606 PE=2 SV=1;tr|F8WC54|F8WC54_HUMAN Disintegr				Q13443	0.359218	23.9079	1.03107
5447	10948;51417;65258	Q5QPC2;Q5CZA1;Q9BTX7;A6PVK2;B2RA57	Alpha-tocopherol transfer protein-like	TTPAL;DKFZp686E0870	tr|Q5QPC2|Q5QPC2_HUMAN Alpha-tocopherol transfer protein-like (Fragment) OS=Homo sapiens OX=9606 GN=TTPAL PE=1 SV=1;tr|Q5CZA1|Q5CZA1_HUMAN Uncharacterized protein DKFZp686E0870 OS=Homo sapiens OX=9606 GN=DKFZp686E0870 PE=2 SV=1;sp|Q9BTX7|TTPAL_HUMAN Alpha-	Q5QPC2	221850	228750	162960	146050	246200	247020	274580	245620	250530	246320	249040	0			17.7592	17.8034	17.3142	17.1561	17.9095	17.9143	18.0669	17.9061	17.9346	17.9102	17.926	Q5QPC2	0.438175		Q5QPC2	0.357926	17.7674	3.85973	0.000416821	0.0125375	-0.160401	tr|Q5QPC2|Q5QPC2_HUMAN Alpha-tocopherol transfer protein-like (Fragment) OS=Homo sapiens OX=9606 GN=TTPAL PE=1 SV=1;tr|Q5CZA1|Q5CZA1_HUMAN Uncharacterized protein DKFZp686E0870 OS=Homo sapiens OX=9606 GN=DKFZp686E0870 PE=2 SV=1;sp|Q9BTX7|TTPAL_HUMAN Alpha-				Q5QPC2	0.357926	17.7674	1.02327
2191	42284;62740	A0A494BYR6;Q86Y91	Kinesin-like protein KIF18B	KIF18B	tr|A0A494BYR6|A0A494BYR6_HUMAN Kinesin-like protein KIF18B OS=Homo sapiens OX=9606 GN=KIF18B PE=4 SV=1;sp|Q86Y91|KI18B_HUMAN Kinesin-like protein KIF18B OS=Homo sapiens OX=9606 GN=KIF18B PE=1 SV=4	A0A494BYR6	195980	191910	183650	169780	181330	226550	250350	240980	225540	238210	166640	0			17.5803	17.5501	17.4866	17.3733	17.4683	17.7895	17.9336	17.8786	17.783	17.8619	17.3464	A0A494BYR6	0.351718		A0A494BYR6	0.357582	17.6705	5.44849	3.04248e-06	0.000442916	4.49649	tr|A0A494BYR6|A0A494BYR6_HUMAN Kinesin-like protein KIF18B OS=Homo sapiens OX=9606 GN=KIF18B PE=4 SV=1;sp|Q86Y91|KI18B_HUMAN Kinesin-like protein KIF18B OS=Homo sapiens OX=9606 GN=KIF18B PE=1 SV=4				A0A494BYR6	0.357582	17.6705	1.44062
395	4849;16040;19316;19404;28103;41700;44009	A0A024R3Z9;Q6NVI2;A0A0A0MS31;A0A024R3Z8;Q14790;E7ETB7;E7EQ06;B6CGU5;B5BU46;C3S3G0;E7EQ01;E7EVN1;K4FGA0;C9JB29;H7BZM4;H7C0E2	Caspase-8;Caspase-8 subunit p18;Caspase-8 subunit p10	hCG_16983;CASP8;Casp8	tr|A0A024R3Z9|A0A024R3Z9_HUMAN HCG16983, isoform CRA_a OS=Homo sapiens OX=9606 GN=hCG_16983 PE=4 SV=1;tr|Q6NVI2|Q6NVI2_HUMAN CASP8 protein OS=Homo sapiens OX=9606 GN=CASP8 PE=2 SV=1;tr|A0A0A0MS31|A0A0A0MS31_HUMAN Caspase-8 OS=Homo sapiens OX=9606 GN=CASP8	A0A024R3Z9	578180	583400	540080	467050	586830	615180	645510	673600	698790	921570	525520	0			19.1412	19.1541	19.0428	18.8332	19.1626	19.2307	19.3001	19.3615	19.4145	19.8137	19.0034	A0A024R3Z9	0.381268		A0A024R3Z9	0.357318	19.2454	4.3272	0.000102171	0.00572256	1.16177	tr|A0A024R3Z9|A0A024R3Z9_HUMAN HCG16983, isoform CRA_a OS=Homo sapiens OX=9606 GN=hCG_16983 PE=4 SV=1;tr|Q6NVI2|Q6NVI2_HUMAN CASP8 protein OS=Homo sapiens OX=9606 GN=CASP8 PE=2 SV=1;tr|A0A0A0MS31|A0A0A0MS31_HUMAN Caspase-8 OS=Homo sapiens OX=9606 GN=CASP8				A0A024R3Z9	0.357318	19.2454	1.14179
2098	59771;62140	B4DVZ4;Q53EW8;A0A384NKQ2;Q16762;B1AH48	Sulfurtransferase;Thiosulfate sulfurtransferase	TST	tr|B4DVZ4|B4DVZ4_HUMAN cDNA FLJ57870, highly similar to Thiosulfate sulfurtransferase OS=Homo sapiens OX=9606 PE=2 SV=1;tr|Q53EW8|Q53EW8_HUMAN Sulfurtransferase (Fragment) OS=Homo sapiens OX=9606 PE=2 SV=1;tr|A0A384NKQ2|A0A384NKQ2_HUMAN Sulfurtransferase O	B4DVZ4	516810	492400	444070	397370	513180	597930	641620	610380	590810	573810	470470	0			18.9793	18.9095	18.7604	18.6001	18.9691	19.1896	19.2914	19.2193	19.1723	19.1302	18.8437	B4DVZ4	0.388251		B4DVZ4	0.356896	19.0221	4.99682	1.27338e-05	0.00130344	3.13457	tr|B4DVZ4|B4DVZ4_HUMAN cDNA FLJ57870, highly similar to Thiosulfate sulfurtransferase OS=Homo sapiens OX=9606 PE=2 SV=1;tr|Q53EW8|Q53EW8_HUMAN Sulfurtransferase (Fragment) OS=Homo sapiens OX=9606 PE=2 SV=1;tr|A0A384NKQ2|A0A384NKQ2_HUMAN Sulfurtransferase O				B4DVZ4	0.356896	19.0221	1.31413
2578	28748	Q6AW82;F6TX30;A8K9U2;Q9NWX5	Ankyrin repeat and SOCS box protein 6	DKFZp686H0429;ASB6	tr|Q6AW82|Q6AW82_HUMAN Uncharacterized protein DKFZp686H0429 (Fragment) OS=Homo sapiens OX=9606 GN=DKFZp686H0429 PE=2 SV=1;tr|F6TX30|F6TX30_HUMAN Ankyrin repeat and SOCS box protein 6 OS=Homo sapiens OX=9606 GN=ASB6 PE=1 SV=1;tr|A8K9U2|A8K9U2_HUMAN cDNA FL	Q6AW82	37246	38935	30334	40696	40537	58739	82626	35810	39592	36184	33852	0			15.1848	15.2488	14.8887	15.3126	15.307	15.842	16.3343	15.1281	15.2729	15.1431	15.047	Q6AW82	0.385371		Q6AW82	0.355722	15.3662	2.75525	0.00887722	0.0559893	-2.97875	tr|Q6AW82|Q6AW82_HUMAN Uncharacterized protein DKFZp686H0429 (Fragment) OS=Homo sapiens OX=9606 GN=DKFZp686H0429 PE=2 SV=1;tr|F6TX30|F6TX30_HUMAN Ankyrin repeat and SOCS box protein 6 OS=Homo sapiens OX=9606 GN=ASB6 PE=1 SV=1;tr|A8K9U2|A8K9U2_HUMAN cDNA FL				Q6AW82	0.355722	15.3662	0.717914
4476	1246;1382;4177;4588;11017;11615;11914;13989;15325;16992;20075;26367;28447;28651;33798;35082;42182;59073;60255;65253	P08243;F8WEJ5;C9J057;C9JT45;C9JM09;C9JLN6	Asparagine synthetase [glutamine-hydrolyzing]	ASNS	sp|P08243|ASNS_HUMAN Asparagine synthetase [glutamine-hydrolyzing] OS=Homo sapiens OX=9606 GN=ASNS PE=1 SV=4	P08243	25666000	23296000	22393000	20718000	23651000	27297000	31098000	30323000	30083000	29053000	26500000	0			24.6134	24.4736	24.4165	24.3044	24.4954	24.7022	24.8903	24.8539	24.8424	24.7922	24.6595	P08243	0.364255		P08243	0.355568	24.6384	5.23192	6.05492e-06	0.00074524	3.8414	sp|P08243|ASNS_HUMAN Asparagine synthetase [glutamine-hydrolyzing] OS=Homo sapiens OX=9606 GN=ASNS PE=1 SV=4				P08243	0.355568	24.6384	1.36156
2060	2383;16616;23028;32243;33267;39055;47835;48890;57733;63304	A0A384MR07;Q13188;A0A087WZ06;E5RFQ9;E5RIM6;Q8NBU1;Q15452;A0A087WVN8;Q9BS84;A0A087WYT4	Serine/threonine-protein kinase 3;Serine/threonine-protein kinase 3 36kDa subunit;Serine/threonine-protein kinase 3 20kDa subunit	STK3	tr|A0A384MR07|A0A384MR07_HUMAN Epididymis secretory sperm binding protein OS=Homo sapiens OX=9606 PE=2 SV=1;sp|Q13188|STK3_HUMAN Serine/threonine-protein kinase 3 OS=Homo sapiens OX=9606 GN=STK3 PE=1 SV=2;tr|A0A087WZ06|A0A087WZ06_HUMAN Serine/threonine-pro	A0A384MR07	1959200	1840700	1671600	1531400	1715800	2106500	2295000	2304000	2197600	2217800	1875200	0			20.9018	20.8118	20.6728	20.5464	20.7105	21.0064	21.1301	21.1357	21.0675	21.0807	20.8386	A0A384MR07	0.35086		A0A384MR07	0.355414	20.9064	5.15871	7.63569e-06	0.000873188	3.62075	tr|A0A384MR07|A0A384MR07_HUMAN Epididymis secretory sperm binding protein OS=Homo sapiens OX=9606 PE=2 SV=1;sp|Q13188|STK3_HUMAN Serine/threonine-protein kinase 3 OS=Homo sapiens OX=9606 GN=STK3 PE=1 SV=2;tr|A0A087WZ06|A0A087WZ06_HUMAN Serine/threonine-pro				A0A384MR07	0.355414	20.9064	1.34086
2559	1860;5761;22091;30862;46863;50275	A8K8Z3;Q9UKI8	Serine/threonine-protein kinase tousled-like 1	TLK1	tr|A8K8Z3|A8K8Z3_HUMAN cDNA FLJ77613, highly similar to Homo sapiens tousled-like kinase 1 (TLK1), mRNA OS=Homo sapiens OX=9606 PE=2 SV=1;sp|Q9UKI8|TLK1_HUMAN Serine/threonine-protein kinase tousled-like 1 OS=Homo sapiens OX=9606 GN=TLK1 PE=1 SV=2	A8K8Z3	809390	859600	528320	451650	726220	793990	832770	812720	819320	934510	706950	0			19.6265	19.7133	19.0111	18.7848	19.4701	19.5988	19.6676	19.6324	19.6441	19.8339	19.4312	A8K8Z3	0.391405		A8K8Z3	0.35418	19.4982	3.38607	0.0016329	0.0273347	-1.43164	tr|A8K8Z3|A8K8Z3_HUMAN cDNA FLJ77613, highly similar to Homo sapiens tousled-like kinase 1 (TLK1), mRNA OS=Homo sapiens OX=9606 PE=2 SV=1;sp|Q9UKI8|TLK1_HUMAN Serine/threonine-protein kinase tousled-like 1 OS=Homo sapiens OX=9606 GN=TLK1 PE=1 SV=2				A8K8Z3	0.35418	19.4982	0.871379
1497	60711;61338	A0A0D9SEI0;Q9P0P8	Uncharacterized protein C6orf203	C6orf203	tr|A0A0D9SEI0|A0A0D9SEI0_HUMAN Uncharacterized protein C6orf203 OS=Homo sapiens OX=9606 GN=C6orf203 PE=1 SV=1;sp|Q9P0P8|CF203_HUMAN Uncharacterized protein C6orf203 OS=Homo sapiens OX=9606 GN=C6orf203 PE=1 SV=1	A0A0D9SEI0	77361	71923	63871	58569	75862	77690	89819	93199	84938	97157	87398	0			16.2393	16.1342	15.9629	15.8378	16.2111	16.2454	16.4547	16.508	16.3741	16.568	16.4153	A0A0D9SEI0	0.38652		A0A0D9SEI0	0.353012	16.2536	4.66145	3.64182e-05	0.00297736	2.13743	tr|A0A0D9SEI0|A0A0D9SEI0_HUMAN Uncharacterized protein C6orf203 OS=Homo sapiens OX=9606 GN=C6orf203 PE=1 SV=1;sp|Q9P0P8|CF203_HUMAN Uncharacterized protein C6orf203 OS=Homo sapiens OX=9606 GN=C6orf203 PE=1 SV=1				A0A0D9SEI0	0.353012	16.2536	1.18813
6012	28341;31548;31675;33310;36553;37591;50131;54185;54186;62176	Q8TB36;B4DIH2	Ganglioside-induced differentiation-associated protein 1	GDAP1	sp|Q8TB36|GDAP1_HUMAN Ganglioside-induced differentiation-associated protein 1 OS=Homo sapiens OX=9606 GN=GDAP1 PE=1 SV=3;tr|B4DIH2|B4DIH2_HUMAN cDNA FLJ60563, highly similar to Ganglioside-induceddifferentiation-associated protein 1 OS=Homo sapiens OX=960	Q8TB36	8484100	7833400	7233700	6808400	8103100	9603300	10107000	9768300	9542100	9945700	9548000	0			23.0163	22.9012	22.7863	22.6989	22.95	23.1951	23.2689	23.2197	23.1859	23.2456	23.1868	Q8TB36	0.372348		Q8TB36	0.352476	23.0468	5.20015	6.69642e-06	0.000804086	3.7456	sp|Q8TB36|GDAP1_HUMAN Ganglioside-induced differentiation-associated protein 1 OS=Homo sapiens OX=9606 GN=GDAP1 PE=1 SV=3;tr|B4DIH2|B4DIH2_HUMAN cDNA FLJ60563, highly similar to Ganglioside-induceddifferentiation-associated protein 1 OS=Homo sapiens OX=960				Q8TB36	0.352476	23.0468	1.31955
817	38242;39841	A0A024R9A0;Q629K1;E5RG44;E5RIT1;E5RGJ1	Triple QxxK/R motif-containing protein	hCG_20714;TRIQK	tr|A0A024R9A0|A0A024R9A0_HUMAN HCG20714, isoform CRA_a OS=Homo sapiens OX=9606 GN=hCG_20714 PE=4 SV=1;sp|Q629K1|TRIQK_HUMAN Triple QxxK/R motif-containing protein OS=Homo sapiens OX=9606 GN=TRIQK PE=3 SV=1;tr|E5RG44|E5RG44_HUMAN Triple QxxK/R motif-contain	A0A024R9A0	241520	232300	223250	203290	269910	298640	353720	285520	294810	261410	217280	0			17.8818	17.8256	17.7683	17.6332	18.0421	18.1881	18.4322	18.1232	18.1694	17.996	17.7292	A0A024R9A0	0.40456		A0A024R9A0	0.35158	18.006	4.59993	4.40915e-05	0.00331696	1.95632	tr|A0A024R9A0|A0A024R9A0_HUMAN HCG20714, isoform CRA_a OS=Homo sapiens OX=9606 GN=hCG_20714 PE=4 SV=1;sp|Q629K1|TRIQK_HUMAN Triple QxxK/R motif-containing protein OS=Homo sapiens OX=9606 GN=TRIQK PE=3 SV=1;tr|E5RG44|E5RG44_HUMAN Triple QxxK/R motif-contain				A0A024R9A0	0.35158	18.006	1.15849
2442	1383;36197	Q6PI47;A8K4A2;A0A024R406	BTB/POZ domain-containing protein KCTD18	KCTD18	sp|Q6PI47|KCD18_HUMAN BTB/POZ domain-containing protein KCTD18 OS=Homo sapiens OX=9606 GN=KCTD18 PE=2 SV=2;tr|A8K4A2|A8K4A2_HUMAN cDNA FLJ76153, highly similar to Homo sapiens potassium channel tetramerisation domain containing 18 (KCTD18), mRNA OS=Homo sa	Q6PI47	358850	332630	306470	299190	338360	414730	431620	412370	397680	425480	339430	0			18.453	18.3436	18.2254	18.1907	18.3682	18.6618	18.7194	18.6536	18.6013	18.6987	18.3728	Q6PI47	0.363786		Q6PI47	0.35078	18.4916	5.26679	5.42085e-06	0.000690771	3.94666	sp|Q6PI47|KCD18_HUMAN BTB/POZ domain-containing protein KCTD18 OS=Homo sapiens OX=9606 GN=KCTD18 PE=2 SV=2;tr|A8K4A2|A8K4A2_HUMAN cDNA FLJ76153, highly similar to Homo sapiens potassium channel tetramerisation domain containing 18 (KCTD18), mRNA OS=Homo sa				Q6PI47	0.35078	18.4916	1.31746
592	78;2376;3500;5812;7687;8546;9468;9628;11341;11342;17712;22571;27056;29563;30816;32263;42242;45486;56796	P23381;A0A024R6K8;G3V3Y5;G3V3H8;G3V277;B4DTK8;G3V227;G3V3P2;G3V456;G3V5U1;G3V423;G3V3X0;G3V5W1;G3V2Y7;G3V3S7;G3V4N8;G3V4C7;G3V2C0;G3V339;G3V313;G3V4S4;G3V3R3;H0YJP3;G3V2F2;G3V4N0;P78534;G3V4Q0;G3V4A3;G3V5H5	Tryptophan--tRNA ligase, cytoplasmic;T1-TrpRS;T2-TrpRS	WARS	sp|P23381|SYWC_HUMAN Tryptophan--tRNA ligase, cytoplasmic OS=Homo sapiens OX=9606 GN=WARS PE=1 SV=2;tr|A0A024R6K8|A0A024R6K8_HUMAN Epididymis secretory sperm binding protein OS=Homo sapiens OX=9606 GN=WARS PE=2 SV=1	P23381	49646000	47621000	41328000	37379000	47890000	53571000	59292000	58059000	56392000	56646000	58399000	0			25.5652	25.5051	25.3006	25.1557	25.5132	25.6749	25.8213	25.791	25.749	25.7555	25.7994	P23381	0.3767		P23381	0.350386	25.5832	4.8412	2.07696e-05	0.00196493	2.66999	sp|P23381|SYWC_HUMAN Tryptophan--tRNA ligase, cytoplasmic OS=Homo sapiens OX=9606 GN=WARS PE=1 SV=2;tr|A0A024R6K8|A0A024R6K8_HUMAN Epididymis secretory sperm binding protein OS=Homo sapiens OX=9606 GN=WARS PE=2 SV=1				P23381	0.350386	25.5832	1.20692
5399	4966;10800;29677;40102;53192	Q8WYJ5;Q53HJ8;Q9BX68	Histidine triad nucleotide-binding protein 2, mitochondrial	HINT2	tr|Q8WYJ5|Q8WYJ5_HUMAN Protein kinase C inhibitor-2 OS=Homo sapiens OX=9606 PE=2 SV=1;tr|Q53HJ8|Q53HJ8_HUMAN PKCI-1-related HIT protein variant (Fragment) OS=Homo sapiens OX=9606 PE=2 SV=1;sp|Q9BX68|HINT2_HUMAN Histidine triad nucleotide-binding protein 2,	Q8WYJ5	4643100	4079400	3873500	3486500	4062600	4704300	5186500	5160700	5320600	5213900	5257400	0			22.1467	21.9599	21.8852	21.7334	21.954	22.1655	22.3063	22.2991	22.3432	22.3139	22.3259	Q8WYJ5	0.354337		Q8WYJ5	0.3498	22.1107	4.95321	1.46087e-05	0.00144788	3.00408	tr|Q8WYJ5|Q8WYJ5_HUMAN Protein kinase C inhibitor-2 OS=Homo sapiens OX=9606 PE=2 SV=1;tr|Q53HJ8|Q53HJ8_HUMAN PKCI-1-related HIT protein variant (Fragment) OS=Homo sapiens OX=9606 PE=2 SV=1;sp|Q9BX68|HINT2_HUMAN Histidine triad nucleotide-binding protein 2,				Q8WYJ5	0.3498	22.1107	1.22861
6393	9657;41192;41193;59877	Q9BXV9	Uncharacterized protein C14orf142	C14orf142	sp|Q9BXV9|GON7_HUMAN EKC/KEOPS complex subunit GON7 OS=Homo sapiens OX=9606 GN=GON7 PE=1 SV=2	Q9BXV9	2258400	2597200	1409500	1236500	2281000	2180000	2409200	2476000	2459400	2449100	3141600	0			21.1069	21.3085	20.4267	20.2378	21.1212	21.0559	21.2001	21.2396	21.2299	21.2238	21.5831	Q9BXV9	0.419865		Q9BXV9	0.349618	21.0151	3.01954	0.00445538	0.0431139	-2.35393	sp|Q9BXV9|GON7_HUMAN EKC/KEOPS complex subunit GON7 OS=Homo sapiens OX=9606 GN=GON7 PE=1 SV=2				Q9BXV9	0.349618	21.0151	0.747795
431	19087;22625;23127;42723;61837;65555;66827	Q53GL1;A0A024R4E1;Q9HAN9;B1AN62;K7EPD7	Nicotinamide-nucleotide adenylyltransferase;Nicotinamide/nicotinic acid mononucleotide adenylyltransferase 1	NMNAT1	tr|Q53GL1|Q53GL1_HUMAN Nicotinamide-nucleotide adenylyltransferase (Fragment) OS=Homo sapiens OX=9606 PE=2 SV=1;tr|A0A024R4E1|A0A024R4E1_HUMAN Nicotinamide-nucleotide adenylyltransferase OS=Homo sapiens OX=9606 GN=NMNAT1 PE=3 SV=1;sp|Q9HAN9|NMNA1_HUMAN Nic	Q53GL1	1575100	1401600	1326000	1262400	1456600	1706100	1994700	1771600	1819500	1644600	1796300	0			20.587	20.4186	20.3387	20.2677	20.4742	20.7023	20.9277	20.7566	20.7951	20.6493	20.7766	Q53GL1	0.3632		Q53GL1	0.348968	20.5917	4.95522	1.45164e-05	0.00144788	3.0101	tr|Q53GL1|Q53GL1_HUMAN Nicotinamide-nucleotide adenylyltransferase (Fragment) OS=Homo sapiens OX=9606 PE=2 SV=1;tr|A0A024R4E1|A0A024R4E1_HUMAN Nicotinamide-nucleotide adenylyltransferase OS=Homo sapiens OX=9606 GN=NMNAT1 PE=3 SV=1;sp|Q9HAN9|NMNA1_HUMAN Nic				Q53GL1	0.348968	20.5917	1.22023
652	42392	K7EN05;K7EPC8;A0A024R7E8;K7EQ44;K7EMV4;P60002	Transcription elongation factor 1 homolog	ELOF1	tr|K7EN05|K7EN05_HUMAN Transcription elongation factor 1 homolog OS=Homo sapiens OX=9606 GN=ELOF1 PE=1 SV=1;tr|K7EPC8|K7EPC8_HUMAN Transcription elongation factor 1 homolog OS=Homo sapiens OX=9606 GN=ELOF1 PE=1 SV=1;tr|A0A024R7E8|A0A024R7E8_HUMAN Transcrip	K7EN05	209970	210830	146570	128340	220610	218220	253790	217430	224310	225970	185070	0			17.6798	17.6857	17.1612	16.9696	17.7511	17.7354	17.9533	17.7302	17.7751	17.7858	17.4977	K7EN05	0.421865		K7EN05	0.346456	17.6227	3.55504	0.0010113	0.0204746	-0.9874	tr|K7EN05|K7EN05_HUMAN Transcription elongation factor 1 homolog OS=Homo sapiens OX=9606 GN=ELOF1 PE=1 SV=1;tr|K7EPC8|K7EPC8_HUMAN Transcription elongation factor 1 homolog OS=Homo sapiens OX=9606 GN=ELOF1 PE=1 SV=1;tr|A0A024R7E8|A0A024R7E8_HUMAN Transcrip				K7EN05	0.346456	17.6227	0.856003
888	111;8654;9307;15417;41056;43545;65628	B7Z7T1;B2RAT5;A0A024RA74;Q8TCY9	Up-regulator of cell proliferation	URG4;URGCP	tr|B7Z7T1|B7Z7T1_HUMAN cDNA FLJ58708, weakly similar to Mus musculus GTPase, very large interferon inducible 1, transcript variant A, mRNA OS=Homo sapiens OX=9606 PE=2 SV=1;tr|B2RAT5|B2RAT5_HUMAN cDNA, FLJ95100, highly similar to Homo sapiens up-regulated	B7Z7T1	592470	553100	561010	540090	644110	643610	886960	690580	640150	837120	719510	0			19.1764	19.0772	19.0977	19.0428	19.2969	19.2958	19.7585	19.3974	19.288	19.6751	19.4567	B7Z7T1	0.384466		B7Z7T1	0.34478	19.3106	4.34877	9.56438e-05	0.00560081	1.22408	tr|B7Z7T1|B7Z7T1_HUMAN cDNA FLJ58708, weakly similar to Mus musculus GTPase, very large interferon inducible 1, transcript variant A, mRNA OS=Homo sapiens OX=9606 PE=2 SV=1;tr|B2RAT5|B2RAT5_HUMAN cDNA, FLJ95100, highly similar to Homo sapiens up-regulated				B7Z7T1	0.34478	19.3106	1.03107
3697	11531;11532;12937;14217;21662;23678;23679;24476;26438;28908;32949;34762;38413;42030;42031;42164;42165;42888;46230;47067;47098;47100;47989;47990;49519;49600;49601;49947;50790;52772;59275;62208;62209;66012	E9PGZ1;Q6PJM5		CALD1	tr|E9PGZ1|E9PGZ1_HUMAN Caldesmon OS=Homo sapiens OX=9606 GN=CALD1 PE=1 SV=1;tr|Q6PJM5|Q6PJM5_HUMAN CALD1 protein (Fragment) OS=Homo sapiens OX=9606 GN=CALD1 PE=2 SV=1	E9PGZ1	1896300	1706200	1767800	1466900	1991600	2116900	2276100	2355700	2185100	2223200	3509500	0			20.8548	20.7023	20.7535	20.4843	20.9255	21.0135	21.1181	21.1677	21.0593	21.0842	21.7428	E9PGZ1	0.389827		E9PGZ1	0.344476	20.9163	4.78	2.51575e-05	0.00231005	2.48813	tr|E9PGZ1|E9PGZ1_HUMAN Caldesmon OS=Homo sapiens OX=9606 GN=CALD1 PE=1 SV=1;tr|Q6PJM5|Q6PJM5_HUMAN CALD1 protein (Fragment) OS=Homo sapiens OX=9606 GN=CALD1 PE=2 SV=1				E9PGZ1	0.344476	20.9163	1.1301
5267	4771;28392;31354;31901;32360;37623;40438;44317;58715	Q15650;H0YL91;H0YKD9;H0YLN7	Activating signal cointegrator 1	TRIP4	sp|Q15650|TRIP4_HUMAN Activating signal cointegrator 1 OS=Homo sapiens OX=9606 GN=TRIP4 PE=1 SV=4;tr|H0YL91|H0YL91_HUMAN Activating signal cointegrator 1 OS=Homo sapiens OX=9606 GN=TRIP4 PE=1 SV=1	Q15650	650440	773300	466420	435130	743010	681420	866880	741680	745860	765060	985330	0			19.3111	19.5607	18.8313	18.7311	19.503	19.3782	19.7255	19.5004	19.5085	19.5452	19.9103	Q15650	0.423047		Q15650	0.344148	19.3595	3.34525	0.00183057	0.0289369	-1.53725	sp|Q15650|TRIP4_HUMAN Activating signal cointegrator 1 OS=Homo sapiens OX=9606 GN=TRIP4 PE=1 SV=4;tr|H0YL91|H0YL91_HUMAN Activating signal cointegrator 1 OS=Homo sapiens OX=9606 GN=TRIP4 PE=1 SV=1				Q15650	0.344148	19.3595	0.788455
5333	2324;60966	Q3KRA9;H0YEM5;B0AZV3;H0YEC4;E9PI76;B4E3P3;B2RAE0	Alpha-ketoglutarate-dependent dioxygenase alkB homolog 6	ALKBH6	sp|Q3KRA9|ALKB6_HUMAN Alpha-ketoglutarate-dependent dioxygenase alkB homolog 6 OS=Homo sapiens OX=9606 GN=ALKBH6 PE=1 SV=2;tr|H0YEM5|H0YEM5_HUMAN Alpha-ketoglutarate-dependent dioxygenase alkB homolog 6 (Fragment) OS=Homo sapiens OX=9606 GN=ALKBH6 PE=1 SV=	Q3KRA9	33550	34390	29708	25016	40438	40145	42659	40332	40160	41151	44121	0			15.034	15.0697	14.8586	14.6106	15.3034	15.2929	15.3806	15.2996	15.2935	15.3286	15.4292	Q3KRA9	0.425835		Q3KRA9	0.343794	15.1472	4.20749	0.000147124	0.00723339	0.817903	sp|Q3KRA9|ALKB6_HUMAN Alpha-ketoglutarate-dependent dioxygenase alkB homolog 6 OS=Homo sapiens OX=9606 GN=ALKBH6 PE=1 SV=2;tr|H0YEM5|H0YEM5_HUMAN Alpha-ketoglutarate-dependent dioxygenase alkB homolog 6 (Fragment) OS=Homo sapiens OX=9606 GN=ALKBH6 PE=1 SV=				Q3KRA9	0.343794	15.1472	0.988368
4419	17337;40054;51624;62610;65271	O95989	Diphosphoinositol polyphosphate phosphohydrolase 1	NUDT3	sp|O95989|NUDT3_HUMAN Diphosphoinositol polyphosphate phosphohydrolase 1 OS=Homo sapiens OX=9606 GN=NUDT3 PE=1 SV=1	O95989	839390	856460	603350	608100	809240	913980	990640	937420	934770	881570	1013200	0			19.679	19.708	19.2026	19.214	19.6262	19.8018	19.918	19.8383	19.8343	19.7497	19.9505	O95989	0.377524		O95989	0.342462	19.6572	4.1806	0.000159616	0.00746474	0.741134	sp|O95989|NUDT3_HUMAN Diphosphoinositol polyphosphate phosphohydrolase 1 OS=Homo sapiens OX=9606 GN=NUDT3 PE=1 SV=1				O95989	0.342462	19.6572	0.969611
5694	2095;34145;54757	Q6ZT12;H7C481;H0Y3K2	E3 ubiquitin-protein ligase UBR3	UBR3	sp|Q6ZT12|UBR3_HUMAN E3 ubiquitin-protein ligase UBR3 OS=Homo sapiens OX=9606 GN=UBR3 PE=2 SV=2	Q6ZT12	82127	65039	76354	62894	66112	88752	129820	64941	99842	74247	57030	0			16.3256	15.989	16.2204	15.9406	16.0126	16.4375	16.9861	15.9868	16.6074	16.18	15.7994	Q6ZT12	0.320666		Q6ZT12	0.341924	16.2686	3.23397	0.00249204	0.0342013	-1.82161	sp|Q6ZT12|UBR3_HUMAN E3 ubiquitin-protein ligase UBR3 OS=Homo sapiens OX=9606 GN=UBR3 PE=2 SV=2				Q6ZT12	0.341924	16.2686	0.746151
7072	33172;45420	X5DQZ7		GPX1	tr|X5DQZ7|X5DQZ7_HUMAN Glutathione peroxidase 1 isoform A OS=Homo sapiens OX=9606 GN=GPX1 PE=2 SV=1	X5DQZ7	366380	347680	355950	313840	371090	350280	570860	429910	378140	526220	472980	0			18.483	18.4074	18.4413	18.2597	18.5014	18.4182	19.1228	18.7137	18.5286	19.0053	18.8514	X5DQZ7	0.359854		X5DQZ7	0.33914	18.5881	3.79097	0.000510303	0.0140007	-0.349725	tr|X5DQZ7|X5DQZ7_HUMAN Glutathione peroxidase 1 isoform A OS=Homo sapiens OX=9606 GN=GPX1 PE=2 SV=1				X5DQZ7	0.33914	18.5881	0.850722
4232	1935;6438;10107;45822;53460;65553	O43752	Syntaxin-6	STX6	sp|O43752|STX6_HUMAN Syntaxin-6 OS=Homo sapiens OX=9606 GN=STX6 PE=1 SV=1	O43752	1912100	1567000	1587400	1489200	1694300	1911800	2370600	2168000	2090500	1880300	2111300	0			20.8667	20.5796	20.5982	20.5061	20.6923	20.8665	21.1768	21.0479	20.9954	20.8425	21.0097	O43752	0.34818		O43752	0.33726	20.8172	4.57165	4.81326e-05	0.00349465	1.87329	sp|O43752|STX6_HUMAN Syntaxin-6 OS=Homo sapiens OX=9606 GN=STX6 PE=1 SV=1				O43752	0.33726	20.8172	1.00615
2790	11121;25285;33255;39276;50752	K7ESE9;B7ZKU7;B2RBN7;Q9H6U6;B4E3M9;Q70WD9	Breast carcinoma-amplified sequence 3	BCAS3	tr|K7ESE9|K7ESE9_HUMAN Breast carcinoma-amplified sequence 3 OS=Homo sapiens OX=9606 GN=BCAS3 PE=1 SV=1;tr|B7ZKU7|B7ZKU7_HUMAN Breast carcinoma amplified sequence 3 OS=Homo sapiens OX=9606 GN=BCAS3 PE=2 SV=1;tr|B2RBN7|B2RBN7_HUMAN cDNA, FLJ95607, highly si	K7ESE9	2032300	1878500	1759400	1670000	1876100	2300700	2382300	2370400	2209300	2354400	2148400	0			20.9547	20.8411	20.7466	20.6714	20.8393	21.1336	21.1839	21.1767	21.0752	21.1669	21.0348	K7ESE9	0.343795		K7ESE9	0.336628	20.979	5.05719	1.05255e-05	0.0011236	3.31557	tr|K7ESE9|K7ESE9_HUMAN Breast carcinoma-amplified sequence 3 OS=Homo sapiens OX=9606 GN=BCAS3 PE=1 SV=1;tr|B7ZKU7|B7ZKU7_HUMAN Breast carcinoma amplified sequence 3 OS=Homo sapiens OX=9606 GN=BCAS3 PE=2 SV=1;tr|B2RBN7|B2RBN7_HUMAN cDNA, FLJ95607, highly si				K7ESE9	0.336628	20.979	1.1056
504	24727;33248	H0YD65;Q6FHS1;A0A024R5G9;Q9UBX1	Cathepsin F	CTSF	tr|H0YD65|H0YD65_HUMAN Cathepsin F (Fragment) OS=Homo sapiens OX=9606 GN=CTSF PE=1 SV=8;tr|Q6FHS1|Q6FHS1_HUMAN CTSF protein (Fragment) OS=Homo sapiens OX=9606 GN=CTSF PE=2 SV=1;tr|A0A024R5G9|A0A024R5G9_HUMAN Cathepsin F, isoform CRA_a OS=Homo sapiens OX=96	H0YD65	983340	849160	846230	780820	872520	1052400	1130600	1083600	1086100	1103100	864420	0			19.9073	19.6957	19.6907	19.5746	19.7348	20.0053	20.1087	20.0474	20.0507	20.0731	19.7214	H0YD65	0.339951		H0YD65	0.336402	19.8888	4.99799	1.26869e-05	0.00130344	3.13808	tr|H0YD65|H0YD65_HUMAN Cathepsin F (Fragment) OS=Homo sapiens OX=9606 GN=CTSF PE=1 SV=8;tr|Q6FHS1|Q6FHS1_HUMAN CTSF protein (Fragment) OS=Homo sapiens OX=9606 GN=CTSF PE=2 SV=1;tr|A0A024R5G9|A0A024R5G9_HUMAN Cathepsin F, isoform CRA_a OS=Homo sapiens OX=96				H0YD65	0.336402	19.8888	1.09004
5221	5985;32358	Q15013	MAD2L1-binding protein	MAD2L1BP	sp|Q15013|MD2BP_HUMAN MAD2L1-binding protein OS=Homo sapiens OX=9606 GN=MAD2L1BP PE=1 SV=1	Q15013	875310	924970	716640	662880	924230	1030000	1169200	986520	1019300	941760	1034000	0			19.7394	19.8191	19.4509	19.3384	19.8179	19.9742	20.1571	19.912	19.9592	19.845	19.9798	Q15013	0.382546		Q15013	0.336356	19.8013	4.17496	0.000162367	0.00746474	0.725041	sp|Q15013|MD2BP_HUMAN MAD2L1-binding protein OS=Homo sapiens OX=9606 GN=MAD2L1BP PE=1 SV=1				Q15013	0.336356	19.8013	0.91009
439	13306	B7Z1X4;A0A0A0MSI6;A0A024R4J6;B7ZAN2;A0A024R4F9;B7Z1P2;Q9H4M3	F-box only protein 44	FBXO44	tr|B7Z1X4|B7Z1X4_HUMAN cDNA FLJ59830, highly similar to F-box only protein 44 OS=Homo sapiens OX=9606 PE=2 SV=1;tr|A0A0A0MSI6|A0A0A0MSI6_HUMAN F-box only protein 44 (Fragment) OS=Homo sapiens OX=9606 GN=FBXO44 PE=1 SV=1;tr|A0A024R4J6|A0A024R4J6_HUMAN F-box	B7Z1X4	85973	73472	75437	62919	82743	79310	112820	87093	88779	114930	114230	0			16.3916	16.1649	16.203	15.9412	16.3363	16.2752	16.7837	16.4103	16.4379	16.8104	16.8016	B7Z1X4	0.368321		B7Z1X4	0.336086	16.3755	3.87894	0.000393823	0.0123569	-0.107249	tr|B7Z1X4|B7Z1X4_HUMAN cDNA FLJ59830, highly similar to F-box only protein 44 OS=Homo sapiens OX=9606 PE=2 SV=1;tr|A0A0A0MSI6|A0A0A0MSI6_HUMAN F-box only protein 44 (Fragment) OS=Homo sapiens OX=9606 GN=FBXO44 PE=1 SV=1;tr|A0A024R4J6|A0A024R4J6_HUMAN F-box				B7Z1X4	0.336086	16.3755	0.843126
1521	3654;24721;25029;41869;49607;55652;57465;62809;67147	A0A1U9X777;A0A0G2JJD3;O95870;A8K0A4;B3KNX9;A0A0G2JI89	Abhydrolase domain-containing protein 16A	ABHD16A;BAT5	tr|A0A1U9X777|A0A1U9X777_HUMAN ABHD16A OS=Homo sapiens OX=9606 PE=4 SV=1;tr|A0A0G2JJD3|A0A0G2JJD3_HUMAN HLA-B associated transcript 5, isoform CRA_b OS=Homo sapiens OX=9606 GN=ABHD16A PE=1 SV=1;sp|O95870|ABHGA_HUMAN Phosphatidylserine lipase ABHD16A OS=Hom	A0A1U9X777	1287800	1198800	1024500	1004800	1138600	1303300	1304500	1430800	1295500	1830000	1240600	0			20.2965	20.1932	19.9665	19.9385	20.1188	20.3137	20.3151	20.4484	20.3051	20.8034	20.2426	A0A1U9X777	0.338486		A0A1U9X777	0.33445	20.2699	4.0897	0.000210005	0.00854647	0.482924	tr|A0A1U9X777|A0A1U9X777_HUMAN ABHD16A OS=Homo sapiens OX=9606 PE=4 SV=1;tr|A0A0G2JJD3|A0A0G2JJD3_HUMAN HLA-B associated transcript 5, isoform CRA_b OS=Homo sapiens OX=9606 GN=ABHD16A PE=1 SV=1;sp|O95870|ABHGA_HUMAN Phosphatidylserine lipase ABHD16A OS=Hom				A0A1U9X777	0.33445	20.2699	0.87328
4028	2329;51200	J3QLA9;J3QLB2;Q8N1S5;J3QRN3;J3KRX2;J3QS49	Zinc transporter ZIP11	SLC39A11	tr|J3QLA9|J3QLA9_HUMAN Zinc transporter ZIP11 (Fragment) OS=Homo sapiens OX=9606 GN=SLC39A11 PE=1 SV=1;tr|J3QLB2|J3QLB2_HUMAN Zinc transporter ZIP11 (Fragment) OS=Homo sapiens OX=9606 GN=SLC39A11 PE=1 SV=8;sp|Q8N1S5|S39AB_HUMAN Zinc transporter ZIP11 OS=Ho	J3QLA9	3974400	3807100	3166700	3207100	3714000	4509800	4345100	4578000	4458300	4544400	3179500	0			21.9223	21.8603	21.5946	21.6128	21.8245	22.1046	22.051	22.1263	22.0881	22.1157	21.6004	J3QLA9	0.34963		J3QLA9	0.33422	21.93	4.80779	2.30621e-05	0.00214925	2.57063	tr|J3QLA9|J3QLA9_HUMAN Zinc transporter ZIP11 (Fragment) OS=Homo sapiens OX=9606 GN=SLC39A11 PE=1 SV=1;tr|J3QLB2|J3QLB2_HUMAN Zinc transporter ZIP11 (Fragment) OS=Homo sapiens OX=9606 GN=SLC39A11 PE=1 SV=8;sp|Q8N1S5|S39AB_HUMAN Zinc transporter ZIP11 OS=Ho				J3QLA9	0.33422	21.93	1.02401
1973	558;4407;13776;15732;17581;29666;31962;35750;35933;38655;44357;44396;50197;51852;53281;53463;57245;57535;63601	A0A2R8Y852;A0A2R8YDI1;A0A097ZMP4;A0A097ZMP6;A0A2R8Y8D0;B4DMN0;O14529;Q9BZV4		CUX1-RETc;CUX1-RETa	tr|A0A2R8Y852|A0A2R8Y852_HUMAN Homeobox protein cut-like OS=Homo sapiens OX=9606 GN=CUX1 PE=1 SV=1;tr|A0A2R8YDI1|A0A2R8YDI1_HUMAN Homeobox protein cut-like OS=Homo sapiens OX=9606 GN=CUX1 PE=1 SV=1;tr|A0A097ZMP4|A0A097ZMP4_HUMAN CUX1-RET fusion protein var	A0A2R8Y852	118540	131600	101850	101890	144760	153640	155710	149490	153780	135400	156880	0			16.855	17.0058	16.6361	16.6366	17.1433	17.2292	17.2485	17.1897	17.2305	17.0469	17.2593	A0A2R8Y852	0.405564		A0A2R8Y852	0.333582	17.0222	4.22744	0.000138476	0.00691717	0.874986	tr|A0A2R8Y852|A0A2R8Y852_HUMAN Homeobox protein cut-like OS=Homo sapiens OX=9606 GN=CUX1 PE=1 SV=1;tr|A0A2R8YDI1|A0A2R8YDI1_HUMAN Homeobox protein cut-like OS=Homo sapiens OX=9606 GN=CUX1 PE=1 SV=1;tr|A0A097ZMP4|A0A097ZMP4_HUMAN CUX1-RET fusion protein var				A0A2R8Y852	0.333582	17.0222	0.89404
6163	2611;9477;19801;26455;30409;30883;37186;37716;37717;44482;47760;48197;49699;50304;64081	Q96CS3;B4E2M8;D6RBG6	FAS-associated factor 2	FAF2	sp|Q96CS3|FAF2_HUMAN FAS-associated factor 2 OS=Homo sapiens OX=9606 GN=FAF2 PE=1 SV=2;tr|B4E2M8|B4E2M8_HUMAN cDNA FLJ61076, highly similar to UBX domain-containing protein 8 OS=Homo sapiens OX=9606 PE=2 SV=1	Q96CS3	19371000	17747000	17108000	16079000	19213000	21531000	24242000	23133000	22619000	21041000	20602000	0			24.2074	24.0811	24.0282	23.9387	24.1956	24.3599	24.531	24.4635	24.431	24.3267	24.2963	Q96CS3	0.358592		Q96CS3	0.332242	24.2563	4.8557	1.98463e-05	0.00190647	2.71315	sp|Q96CS3|FAF2_HUMAN FAS-associated factor 2 OS=Homo sapiens OX=9606 GN=FAF2 PE=1 SV=2;tr|B4E2M8|B4E2M8_HUMAN cDNA FLJ61076, highly similar to UBX domain-containing protein 8 OS=Homo sapiens OX=9606 PE=2 SV=1				Q96CS3	0.332242	24.2563	1.01147
4466	25110;40350;49926;56627;56628;61372;67246	P07305	Histone H1.0;Histone H1.0, N-terminally processed	H1F0	sp|P07305|H10_HUMAN Histone H1.0 OS=Homo sapiens OX=9606 GN=H1F0 PE=1 SV=3	P07305	2194500	2273200	1951000	1941300	2363300	2837600	3163800	2466900	2593200	2456900	3396900	0			21.0655	21.1163	20.8958	20.8886	21.1724	21.4362	21.5932	21.2343	21.3063	21.2284	21.6958	P07305	0.36816		P07305	0.331992	21.1937	4.45467	6.90915e-05	0.0044475	1.53132	sp|P07305|H10_HUMAN Histone H1.0 OS=Homo sapiens OX=9606 GN=H1F0 PE=1 SV=3				P07305	0.331992	21.1937	0.925272
2221	55582;61285	A0JLT6;B4E125;Q8N2H2;Q9BZL6	Protein kinase C;Serine/threonine-protein kinase D2	PRKD2	tr|A0JLT6|A0JLT6_HUMAN PRKD2 protein (Fragment) OS=Homo sapiens OX=9606 GN=PRKD2 PE=2 SV=1;tr|B4E125|B4E125_HUMAN cDNA FLJ61522, highly similar to Serine/threonine-protein kinase D2 OS=Homo sapiens OX=9606 PE=2 SV=1;tr|Q8N2H2|Q8N2H2_HUMAN cDNA FLJ90785 fis	A0JLT6	137220	130860	93405	109230	135500	116090	194060	178110	183890	105980	72608	0			17.0661	16.9977	16.5112	16.737	17.0479	16.8249	17.5661	17.4424	17.4885	16.6934	16.1478	A0JLT6	0.375063		A0JLT6	0.331078	17.0375	2.882	0.00640291	0.0494372	-2.68364	tr|A0JLT6|A0JLT6_HUMAN PRKD2 protein (Fragment) OS=Homo sapiens OX=9606 GN=PRKD2 PE=2 SV=1;tr|B4E125|B4E125_HUMAN cDNA FLJ61522, highly similar to Serine/threonine-protein kinase D2 OS=Homo sapiens OX=9606 PE=2 SV=1;tr|Q8N2H2|Q8N2H2_HUMAN cDNA FLJ90785 fis				A0JLT6	0.331078	17.0375	0.592312
3075	10888;23277;24168;28939;30016;44631;51963;59685	B4DJ39;O94842;O15405;B4DYA1;H6UKR8;B4DQV8;G8YXX4;Q96NM4;O94900	TOX high mobility group box family member 4	TOX4	tr|B4DJ39|B4DJ39_HUMAN cDNA FLJ54357, highly similar to Epidermal Langerhans cell protein LCP1 OS=Homo sapiens OX=9606 PE=2 SV=1;sp|O94842|TOX4_HUMAN TOX high mobility group box family member 4 OS=Homo sapiens OX=9606 GN=TOX4 PE=1 SV=1	B4DJ39	5220500	4829200	4389300	4152000	5062300	7486000	6828600	5296300	5092900	5303200	5089300	0			22.3158	22.2034	22.0656	21.9854	22.2714	22.8358	22.7032	22.3365	22.2801	22.3384	22.279	B4DJ39	0.356282		B4DJ39	0.330512	22.3335	3.86856	0.000406097	0.0124298	-0.135995	tr|B4DJ39|B4DJ39_HUMAN cDNA FLJ54357, highly similar to Epidermal Langerhans cell protein LCP1 OS=Homo sapiens OX=9606 PE=2 SV=1;sp|O94842|TOX4_HUMAN TOX high mobility group box family member 4 OS=Homo sapiens OX=9606 GN=TOX4 PE=1 SV=1				B4DJ39	0.330512	22.3335	0.789808
5896	7855;25070;36543;64879	Q8N108	Mesoderm induction early response protein 1	MIER1	sp|Q8N108|MIER1_HUMAN Mesoderm induction early response protein 1 OS=Homo sapiens OX=9606 GN=MIER1 PE=1 SV=2	Q8N108	577740	684200	407220	382210	740670	620590	735080	689140	646190	704180	736780	0			19.1401	19.3841	18.6354	18.544	19.4985	19.2433	19.4875	19.3944	19.3016	19.4256	19.4909	Q8N108	0.444593		Q8N108	0.330078	19.2054	3.01746	0.00448016	0.0431139	-2.35899	sp|Q8N108|MIER1_HUMAN Mesoderm induction early response protein 1 OS=Homo sapiens OX=9606 GN=MIER1 PE=1 SV=2				Q8N108	0.330078	19.2054	0.612889
1170	4527;11085;15313;43149;53124;61776;66013	B2RBW4;A0A024RE06;P49917;A8K8Q4;A0A0C4DGV9	DNA ligase;DNA ligase 4	LIG4	tr|B2RBW4|B2RBW4_HUMAN DNA ligase OS=Homo sapiens OX=9606 PE=2 SV=1;tr|A0A024RE06|A0A024RE06_HUMAN DNA ligase OS=Homo sapiens OX=9606 GN=LIG4 PE=3 SV=1;sp|P49917|DNLI4_HUMAN DNA ligase 4 OS=Homo sapiens OX=9606 GN=LIG4 PE=1 SV=2;tr|A8K8Q4|A8K8Q4_HUMAN DNA	B2RBW4	1662800	1544900	1502900	1349200	1625300	1878100	2576100	1748700	1726700	1815200	1507900	0			20.6652	20.5591	20.5193	20.3637	20.6323	20.8408	21.2968	20.7379	20.7196	20.7917	20.5241	B2RBW4	0.350536		B2RBW4	0.329444	20.7126	3.99389	0.000279866	0.0102192	0.213081	tr|B2RBW4|B2RBW4_HUMAN DNA ligase OS=Homo sapiens OX=9606 PE=2 SV=1;tr|A0A024RE06|A0A024RE06_HUMAN DNA ligase OS=Homo sapiens OX=9606 GN=LIG4 PE=3 SV=1;sp|P49917|DNLI4_HUMAN DNA ligase 4 OS=Homo sapiens OX=9606 GN=LIG4 PE=1 SV=2;tr|A8K8Q4|A8K8Q4_HUMAN DNA				B2RBW4	0.329444	20.7126	0.805091
6396	25650;33222	Q9BY12;H3BS25	S phase cyclin A-associated protein in the endoplasmic reticulum	SCAPER	sp|Q9BY12|SCAPE_HUMAN S phase cyclin A-associated protein in the endoplasmic reticulum OS=Homo sapiens OX=9606 GN=SCAPER PE=1 SV=2;tr|H3BS25|H3BS25_HUMAN S phase cyclin A-associated protein in the endoplasmic reticulum (Fragment) OS=Homo sapiens OX=9606 GN	Q9BY12	161600	145980	128060	128970	133750	164860	176070	198240	175990	160810	171490	0			17.3021	17.1554	16.9665	16.9767	17.0292	17.3309	17.4258	17.5969	17.4251	17.295	17.3878	Q9BY12	0.314583		Q9BY12	0.328778	17.2503	4.52802	5.50937e-05	0.00395408	1.74545	sp|Q9BY12|SCAPE_HUMAN S phase cyclin A-associated protein in the endoplasmic reticulum OS=Homo sapiens OX=9606 GN=SCAPER PE=1 SV=2;tr|H3BS25|H3BS25_HUMAN S phase cyclin A-associated protein in the endoplasmic reticulum (Fragment) OS=Homo sapiens OX=9606 GN				Q9BY12	0.328778	17.2503	0.905438
5199	5177;55478;57346	Q14674	Separin	ESPL1	sp|Q14674|ESPL1_HUMAN Separin OS=Homo sapiens OX=9606 GN=ESPL1 PE=1 SV=3	Q14674	1524500	1519200	1199200	1203800	1532300	1621600	1929200	1701000	1828600	1632500	1745900	0			20.5399	20.5349	20.1936	20.1992	20.5473	20.629	20.8796	20.6979	20.8023	20.6386	20.7355	Q14674	0.362596		Q14674	0.326522	20.5662	4.27819	0.00011866	0.00644273	1.0206	sp|Q14674|ESPL1_HUMAN Separin OS=Homo sapiens OX=9606 GN=ESPL1 PE=1 SV=3				Q14674	0.326522	20.5662	0.831833
4549	1607;16355;20930;22160;23803	Q5U079;Q53HP8;P17275;Q6FHK0;P05412	Transcription factor jun-B	JUNB	tr|Q5U079|Q5U079_HUMAN Jun B proto-oncogene OS=Homo sapiens OX=9606 GN=JUNB PE=2 SV=1;tr|Q53HP8|Q53HP8_HUMAN Jun B proto-oncogene variant (Fragment) OS=Homo sapiens OX=9606 PE=2 SV=1;sp|P17275|JUNB_HUMAN Transcription factor jun-B OS=Homo sapiens OX=9606 G	Q5U079	2768100	2935900	2149100	1977300	3034900	3114000	3436300	3109600	3078600	3171400	3175200	0			21.4005	21.4854	21.0353	20.9151	21.5332	21.5703	21.7124	21.5683	21.5538	21.5967	21.5984	Q5U079	0.39126		Q5U079	0.326428	21.4371	3.82747	0.0004584	0.0130696	-0.249401	tr|Q5U079|Q5U079_HUMAN Jun B proto-oncogene OS=Homo sapiens OX=9606 GN=JUNB PE=2 SV=1;tr|Q53HP8|Q53HP8_HUMAN Jun B proto-oncogene variant (Fragment) OS=Homo sapiens OX=9606 PE=2 SV=1;sp|P17275|JUNB_HUMAN Transcription factor jun-B OS=Homo sapiens OX=9606 G				Q5U079	0.326428	21.4371	0.74331
1912	22837;64583	D3DVG2;A0A1W2PRF9;Q96TC9;A0A494C146;P50336;A0A1W2PNH4;A0A494C0L4;F5H1I5;A0A494C0M9;A0A494C134;F5GZT7;A0A1W2PPA5;B4DQQ7;A0A494C0D4;B4DY76	Protoporphyrinogen oxidase	PPOX	tr|D3DVG2|D3DVG2_HUMAN Protoporphyrinogen oxidase OS=Homo sapiens OX=9606 GN=PPOX PE=4 SV=1;tr|A0A1W2PRF9|A0A1W2PRF9_HUMAN Protoporphyrinogen oxidase OS=Homo sapiens OX=9606 GN=PPOX PE=1 SV=1;tr|Q96TC9|Q96TC9_HUMAN Protoporphyrinogen oxidase (Fragment) OS=	D3DVG2	1653700	1762400	1391200	1436700	1985500	2099300	2392400	1947000	1948100	1876600	1755300	0			20.6573	20.7491	20.4079	20.4543	20.9211	21.0015	21.19	20.8928	20.8936	20.8397	20.7433	D3DVG2	0.39638		D3DVG2	0.325596	20.8007	4.03095	0.000250505	0.00959761	0.317168	tr|D3DVG2|D3DVG2_HUMAN Protoporphyrinogen oxidase OS=Homo sapiens OX=9606 GN=PPOX PE=4 SV=1;tr|A0A1W2PRF9|A0A1W2PRF9_HUMAN Protoporphyrinogen oxidase OS=Homo sapiens OX=9606 GN=PPOX PE=1 SV=1;tr|Q96TC9|Q96TC9_HUMAN Protoporphyrinogen oxidase (Fragment) OS=				D3DVG2	0.325596	20.8007	0.774527
3553	11866;41596;63648	H3BM75;D3DUL8;Q6P9B6;B4DTA9;A8K5C2;H3BUB0	TLD domain-containing protein 1	TLDC1;KIAA1609	tr|H3BM75|H3BM75_HUMAN MTOR-associated protein MEAK7 OS=Homo sapiens OX=9606 GN=MEAK7 PE=1 SV=1;tr|D3DUL8|D3DUL8_HUMAN KIAA1609 protein, isoform CRA_a OS=Homo sapiens OX=9606 GN=KIAA1609 PE=4 SV=1;sp|Q6P9B6|MEAK7_HUMAN MTOR-associated protein MEAK7 OS=Homo	H3BM75	285040	211950	232340	199570	199110	230090	312930	290930	337510	242030	440780	0			18.1208	17.6934	17.8259	17.6065	17.6032	17.8118	18.2555	18.1503	18.3646	17.8848	18.7497	H3BM75	0.281758		H3BM75	0.323446	17.9317	3.58982	0.000915278	0.0191587	-0.894632	tr|H3BM75|H3BM75_HUMAN MTOR-associated protein MEAK7 OS=Homo sapiens OX=9606 GN=MEAK7 PE=1 SV=1;tr|D3DUL8|D3DUL8_HUMAN KIAA1609 protein, isoform CRA_a OS=Homo sapiens OX=9606 GN=KIAA1609 PE=4 SV=1;sp|Q6P9B6|MEAK7_HUMAN MTOR-associated protein MEAK7 OS=Homo				H3BM75	0.323446	17.9317	0.670488
3950	28032;40544	H7C1I7;Q5VZL5	Zinc finger MYM-type protein 4	ZMYM4	tr|H7C1I7|H7C1I7_HUMAN Zinc finger MYM-type protein 4 (Fragment) OS=Homo sapiens OX=9606 GN=ZMYM4 PE=1 SV=1;sp|Q5VZL5|ZMYM4_HUMAN Zinc finger MYM-type protein 4 OS=Homo sapiens OX=9606 GN=ZMYM4 PE=1 SV=1	H7C1I7	335160	347080	237720	223750	333370	366070	410100	332830	364490	347360	320700	0			18.3545	18.4049	17.8589	17.7715	18.3468	18.4818	18.6456	18.3444	18.4755	18.4061	18.2909	H7C1I7	0.373223		H7C1I7	0.32336	18.309	3.56211	0.000991019	0.0202637	-0.968572	tr|H7C1I7|H7C1I7_HUMAN Zinc finger MYM-type protein 4 (Fragment) OS=Homo sapiens OX=9606 GN=ZMYM4 PE=1 SV=1;sp|Q5VZL5|ZMYM4_HUMAN Zinc finger MYM-type protein 4 OS=Homo sapiens OX=9606 GN=ZMYM4 PE=1 SV=1				H7C1I7	0.32336	18.309	0.664543
3385	4064;38133	B7ZKW3;B7ZKW4;Q8NB37;H0YER3;E9PQD8;H0YE25;H0YF25;B7Z1J9;E9PLI5	Parkinson disease 7 domain-containing protein 1	PDDC1	tr|B7ZKW3|B7ZKW3_HUMAN PDDC1 protein OS=Homo sapiens OX=9606 GN=PDDC1 PE=2 SV=1;tr|B7ZKW4|B7ZKW4_HUMAN PDDC1 protein OS=Homo sapiens OX=9606 GN=PDDC1 PE=2 SV=1;sp|Q8NB37|GALD1_HUMAN Glutamine amidotransferase-like class 1 domain-containing protein 1 OS=Hom	B7ZKW3	163280	145350	133950	140530	156560	183640	267900	161630	167310	160940	109520	0			17.317	17.1492	17.0313	17.1005	17.2564	17.4865	18.0313	17.3023	17.3522	17.2962	16.7408	B7ZKW3	0.344199		B7ZKW3	0.322828	17.3323	3.52556	0.00110023	0.0215355	-1.06571	tr|B7ZKW3|B7ZKW3_HUMAN PDDC1 protein OS=Homo sapiens OX=9606 GN=PDDC1 PE=2 SV=1;tr|B7ZKW4|B7ZKW4_HUMAN PDDC1 protein OS=Homo sapiens OX=9606 GN=PDDC1 PE=2 SV=1;sp|Q8NB37|GALD1_HUMAN Glutamine amidotransferase-like class 1 domain-containing protein 1 OS=Hom				B7ZKW3	0.322828	17.3323	0.652997
3974	10408	I3L1Q3;Q8TE02	Elongator complex protein 5	ELP5	tr|I3L1Q3|I3L1Q3_HUMAN Elongator complex protein 5 (Fragment) OS=Homo sapiens OX=9606 GN=ELP5 PE=1 SV=1;sp|Q8TE02|ELP5_HUMAN Elongator complex protein 5 OS=Homo sapiens OX=9606 GN=ELP5 PE=1 SV=2	I3L1Q3	249600	226810	209040	197990	235350	259750	308060	283410	255790	290790	295170	0			17.9293	17.7911	17.6734	17.5951	17.8444	17.9868	18.2328	18.1125	17.9646	18.1496	18.1712	I3L1Q3	0.342055		I3L1Q3	0.322608	17.928	4.50354	5.94227e-05	0.00416894	1.67389	tr|I3L1Q3|I3L1Q3_HUMAN Elongator complex protein 5 (Fragment) OS=Homo sapiens OX=9606 GN=ELP5 PE=1 SV=1;sp|Q8TE02|ELP5_HUMAN Elongator complex protein 5 OS=Homo sapiens OX=9606 GN=ELP5 PE=1 SV=2				I3L1Q3	0.322608	17.928	0.831635
1274	49774;58763	B7Z3Y3;B7Z3E1;B2R704;B7ZB64;A0A087WZ40;Q14244	Ensconsin	MAP7	tr|B7Z3Y3|B7Z3Y3_HUMAN cDNA FLJ50557, highly similar to Homo sapiens microtubule-associated protein 7 (MAP7), mRNA OS=Homo sapiens OX=9606 PE=2 SV=1;tr|B7Z3E1|B7Z3E1_HUMAN cDNA FLJ50537, highly similar to Homo sapiens microtubule-associated protein 7 (MAP7	B7Z3Y3	754930	702900	649620	606190	752060	817570	918040	897320	855270	834460	886940	0			19.526	19.423	19.3092	19.2094	19.5205	19.641	19.8082	19.7753	19.706	19.6705	19.7585	B7Z3Y3	0.35329		B7Z3Y3	0.322572	19.5589	4.62959	4.02105e-05	0.00309969	2.04358	tr|B7Z3Y3|B7Z3Y3_HUMAN cDNA FLJ50557, highly similar to Homo sapiens microtubule-associated protein 7 (MAP7), mRNA OS=Homo sapiens OX=9606 PE=2 SV=1;tr|B7Z3E1|B7Z3E1_HUMAN cDNA FLJ50537, highly similar to Homo sapiens microtubule-associated protein 7 (MAP7				B7Z3Y3	0.322572	19.5589	0.854491
5046	5178;5248;10495;10496;12802;16336;21976;50587;53750;53908;53948	Q7Z5U1;Q05D20;Q6P0P7;Q6PJV4		THRAP3	tr|Q7Z5U1|Q7Z5U1_HUMAN THRAP3 protein (Fragment) OS=Homo sapiens OX=9606 GN=THRAP3 PE=2 SV=1;tr|Q05D20|Q05D20_HUMAN THRAP3 protein (Fragment) OS=Homo sapiens OX=9606 GN=THRAP3 PE=2 SV=1;tr|Q6P0P7|Q6P0P7_HUMAN THRAP3 protein (Fragment) OS=Homo sapiens OX=96	Q7Z5U1	1532500	1091600	1172100	1150800	1084400	1447100	1735500	1423400	1496300	1398100	1282900	0			20.5475	20.058	20.1607	20.1342	20.0485	20.4647	20.7269	20.4409	20.513	20.415	20.291	Q7Z5U1	0.287034		Q7Z5U1	0.322356	20.3509	4.07327	0.00022064	0.00871947	0.436473	tr|Q7Z5U1|Q7Z5U1_HUMAN THRAP3 protein (Fragment) OS=Homo sapiens OX=9606 GN=THRAP3 PE=2 SV=1;tr|Q05D20|Q05D20_HUMAN THRAP3 protein (Fragment) OS=Homo sapiens OX=9606 GN=THRAP3 PE=2 SV=1;tr|Q6P0P7|Q6P0P7_HUMAN THRAP3 protein (Fragment) OS=Homo sapiens OX=96				Q7Z5U1	0.322356	20.3509	0.749584
193	1299;29465;33264;34199;34574;35322	Q96GA5;Q9BRL4;A0A087WZU2;A0A140VK97;A0A024R183;B7Z8T0;Q00536;Q59FJ5;H0YAZ9;E5RGN0;B7Z461;Q6ZMU4;H0YC36;H0YBX5;H0YC60;E5RJM2	Cyclin-dependent kinase 16	PCTK1;CDK16	tr|Q96GA5|Q96GA5_HUMAN PCTK1 protein (Fragment) OS=Homo sapiens OX=9606 GN=PCTK1 PE=2 SV=2;tr|Q9BRL4|Q9BRL4_HUMAN PCTK1 protein OS=Homo sapiens OX=9606 GN=PCTK1 PE=1 SV=1;tr|A0A087WZU2|A0A087WZU2_HUMAN Cyclin-dependent kinase 16 OS=Homo sapiens OX=9606 GN=	Q96GA5	1071700	1047700	845000	807640	1010900	1181700	1264100	1175300	1181300	1141500	1343200	0			20.0315	19.9988	19.6886	19.6233	19.9472	20.1724	20.2697	20.1646	20.1719	20.1225	20.3572	Q96GA5	0.34468		Q96GA5	0.322348	20.0191	4.36519	9.09525e-05	0.00540864	1.27157	tr|Q96GA5|Q96GA5_HUMAN PCTK1 protein (Fragment) OS=Homo sapiens OX=9606 GN=PCTK1 PE=2 SV=2;tr|Q9BRL4|Q9BRL4_HUMAN PCTK1 protein OS=Homo sapiens OX=9606 GN=PCTK1 PE=1 SV=1;tr|A0A087WZU2|A0A087WZU2_HUMAN Cyclin-dependent kinase 16 OS=Homo sapiens OX=9606 GN=				Q96GA5	0.322348	20.0191	0.803217
2127	997;3027;13651;17478;17522;37725;50186;54018;54745;57982;66462	B7ZLW1;A0A384NY94;Q5T5Y3;Q6WG78	Calmodulin-regulated spectrin-associated protein 1	CAMSAP1	tr|B7ZLW1|B7ZLW1_HUMAN CAMSAP1 protein OS=Homo sapiens OX=9606 GN=CAMSAP1 PE=2 SV=1;tr|A0A384NY94|A0A384NY94_HUMAN Epididymis secretory sperm binding protein OS=Homo sapiens OX=9606 PE=2 SV=1;sp|Q5T5Y3|CAMP1_HUMAN Calmodulin-regulated spectrin-associated p	B7ZLW1	8522000	9495500	6263200	5841500	9295600	9010200	10514000	9647900	9598300	9579900	11876000	0			23.0228	23.1788	22.5785	22.4779	23.1481	23.1031	23.3258	23.2018	23.1944	23.1916	23.5015	B7ZLW1	0.388843		B7ZLW1	0.322116	23.0423	3.47316	0.0012771	0.0236623	-1.20405	tr|B7ZLW1|B7ZLW1_HUMAN CAMSAP1 protein OS=Homo sapiens OX=9606 GN=CAMSAP1 PE=2 SV=1;tr|A0A384NY94|A0A384NY94_HUMAN Epididymis secretory sperm binding protein OS=Homo sapiens OX=9606 PE=2 SV=1;sp|Q5T5Y3|CAMP1_HUMAN Calmodulin-regulated spectrin-associated p				B7ZLW1	0.322116	23.0423	0.637038
3416	36576	E6ZCI6;E6ZCI7;C0MHM2;Q86VZ5	Phosphatidylcholine:ceramide cholinephosphotransferase 1	SGMS1	tr|E6ZCI6|E6ZCI6_HUMAN Phosphatidylcholine:ceramide cholinephosphotransferase 1 OS=Homo sapiens OX=9606 GN=SGMS1 PE=1 SV=1;tr|E6ZCI7|E6ZCI7_HUMAN Sphingomyelin synthase 1 (Fragment) OS=Homo sapiens OX=9606 GN=SGMS1 PE=2 SV=1;tr|C0MHM2|C0MHM2_HUMAN Phosphat	E6ZCI6	47230	35950	36970	31215	39137	39234	55264	53294	49861	40637	36698	0			15.5274	15.1337	15.1741	14.9299	15.2562	15.2598	15.754	15.7017	15.6056	15.3105	15.1634	E6ZCI6	0.335053		E6ZCI6	0.32206	15.3653	3.61509	0.000851064	0.0185806	-0.826936	tr|E6ZCI6|E6ZCI6_HUMAN Phosphatidylcholine:ceramide cholinephosphotransferase 1 OS=Homo sapiens OX=9606 GN=SGMS1 PE=1 SV=1;tr|E6ZCI7|E6ZCI7_HUMAN Sphingomyelin synthase 1 (Fragment) OS=Homo sapiens OX=9606 GN=SGMS1 PE=2 SV=1;tr|C0MHM2|C0MHM2_HUMAN Phosphat				E6ZCI6	0.32206	15.3653	0.662556
5492	1620;6870;51556	Q5T0B9	Zinc finger protein 362	ZNF362	sp|Q5T0B9|ZN362_HUMAN Zinc finger protein 362 OS=Homo sapiens OX=9606 GN=ZNF362 PE=1 SV=1	Q5T0B9	188980	140730	155890	177290	204130	174680	271930	222130	222110	194920	208330	0			17.5279	17.1026	17.2502	17.4357	17.6391	17.4143	18.0529	17.7611	17.7609	17.5725	17.6685	Q5T0B9	0.383254		Q5T0B9	0.321246	17.5517	3.56099	0.000994203	0.0202637	-0.971554	sp|Q5T0B9|ZN362_HUMAN Zinc finger protein 362 OS=Homo sapiens OX=9606 GN=ZNF362 PE=1 SV=1				Q5T0B9	0.321246	17.5517	0.645272
4165	2956;4181;8050;8064;10746;11945;20447;23980;24732;25643;35213;38738;50230;51719;53943;54206;61580;66128;67662	O15031;Q3LIB1;Q2TBE4;A6QRG9;A0A087WU36;Q16293;E2PU09;A0PK02;A6QRH1;H0Y6J7	Plexin-B2	PLXNB2;Nbla00445	sp|O15031|PLXB2_HUMAN Plexin-B2 OS=Homo sapiens OX=9606 GN=PLXNB2 PE=1 SV=3;tr|Q3LIB1|Q3LIB1_HUMAN Uncharacterized protein Nbla00445 (Fragment) OS=Homo sapiens OX=9606 GN=Nbla00445 PE=2 SV=1	O15031	5488200	5318900	4662300	4618200	5327400	6168000	6862900	6298200	6317100	6036700	5955200	0			22.3879	22.3427	22.1526	22.1389	22.345	22.5564	22.7104	22.5865	22.5908	22.5253	22.5057	O15031	0.338359		O15031	0.320464	22.4337	4.6985	3.24486e-05	0.00277547	2.24681	sp|O15031|PLXB2_HUMAN Plexin-B2 OS=Homo sapiens OX=9606 GN=PLXNB2 PE=1 SV=3;tr|Q3LIB1|Q3LIB1_HUMAN Uncharacterized protein Nbla00445 (Fragment) OS=Homo sapiens OX=9606 GN=Nbla00445 PE=2 SV=1				O15031	0.320464	22.4337	0.842007
6905	18498;57502	Q9Y3E2	BolA-like protein 1	BOLA1	sp|Q9Y3E2|BOLA1_HUMAN BolA-like protein 1 OS=Homo sapiens OX=9606 GN=BOLA1 PE=1 SV=1	Q9Y3E2	341100	288050	279310	259600	325320	370460	398020	349990	343460	396980	304800	0			18.3798	18.136	18.0915	17.9859	18.3115	18.499	18.6025	18.4169	18.3898	18.5987	18.2175	Q9Y3E2	0.353066		Q9Y3E2	0.320428	18.3412	4.37819	8.74013e-05	0.00524744	1.30918	sp|Q9Y3E2|BOLA1_HUMAN BolA-like protein 1 OS=Homo sapiens OX=9606 GN=BOLA1 PE=1 SV=1				Q9Y3E2	0.320428	18.3412	0.7842
4145	9063;24334;34991;40653;43267;59971	O14657;H0Y7C8	Torsin-1B	TOR1B	sp|O14657|TOR1B_HUMAN Torsin-1B OS=Homo sapiens OX=9606 GN=TOR1B PE=1 SV=2	O14657	9541800	8900700	7963000	7339300	8577200	10126000	10170000	11123000	10559000	10677000	9977700	0			23.1858	23.0855	22.9249	22.8072	23.0321	23.2716	23.2778	23.407	23.332	23.348	23.2503	O14657	0.326425		O14657	0.32018	23.1672	4.58256	4.65313e-05	0.00345883	1.90532	sp|O14657|TOR1B_HUMAN Torsin-1B OS=Homo sapiens OX=9606 GN=TOR1B PE=1 SV=2				O14657	0.32018	23.1672	0.817894
4219	18852;21426;62616;66114	O43598;H0Y8X4	2-deoxynucleoside 5-phosphate N-hydrolase 1	DNPH1	sp|O43598|DNPH1_HUMAN 2-deoxynucleoside 5-phosphate N-hydrolase 1 OS=Homo sapiens OX=9606 GN=DNPH1 PE=1 SV=1;tr|H0Y8X4|H0Y8X4_HUMAN 2-deoxynucleoside 5-phosphate N-hydrolase 1 (Fragment) OS=Homo sapiens OX=9606 GN=DNPH1 PE=1 SV=1	O43598	1485100	1433200	1371000	1230400	1487300	1769800	1917800	1712200	1685300	1653400	1549700	0			20.5021	20.4508	20.3868	20.2307	20.5043	20.7552	20.871	20.7074	20.6846	20.657	20.5636	O43598	0.342426		O43598	0.320096	20.575	4.67027	3.54317e-05	0.00294981	2.16345	sp|O43598|DNPH1_HUMAN 2-deoxynucleoside 5-phosphate N-hydrolase 1 OS=Homo sapiens OX=9606 GN=DNPH1 PE=1 SV=1;tr|H0Y8X4|H0Y8X4_HUMAN 2-deoxynucleoside 5-phosphate N-hydrolase 1 (Fragment) OS=Homo sapiens OX=9606 GN=DNPH1 PE=1 SV=1				O43598	0.320096	20.575	0.832541
3424	22853;27221;58689	C9IZG4;O60888	Protein CutA	CUTA	tr|C9IZG4|C9IZG4_HUMAN Protein CutA OS=Homo sapiens OX=9606 GN=CUTA PE=1 SV=1;sp|O60888|CUTA_HUMAN Protein CutA OS=Homo sapiens OX=9606 GN=CUTA PE=1 SV=2	C9IZG4	2417600	2472100	2347900	2218000	2805400	3014900	3569600	2990600	2690600	3049400	2748100	0			21.2051	21.2373	21.1629	21.0808	21.4198	21.5237	21.7673	21.512	21.3595	21.5401	21.39	C9IZG4	0.368965		C9IZG4	0.31932	21.3809	4.34466	9.68574e-05	0.00560081	1.21218	tr|C9IZG4|C9IZG4_HUMAN Protein CutA OS=Homo sapiens OX=9606 GN=CUTA PE=1 SV=1;sp|O60888|CUTA_HUMAN Protein CutA OS=Homo sapiens OX=9606 GN=CUTA PE=1 SV=2				C9IZG4	0.31932	21.3809	0.76582
1451	2729;3770;6691;18094;29518;57973	B7Z639;A0A0B4J253;Q8N394;F8VSH2	Transmembrane and TPR repeat-containing protein 2	TMTC2	tr|B7Z639|B7Z639_HUMAN cDNA FLJ54938, weakly similar to Mus musculus transmembrane and tetratricopeptide repeat containing 1 (Tmtc1), mRNA OS=Homo sapiens OX=9606 PE=2 SV=1;tr|A0A0B4J253|A0A0B4J253_HUMAN Protein O-mannosyl-transferase TMTC2 OS=Homo sapiens	B7Z639	584350	618590	436880	408600	623600	603380	736730	632380	654250	661390	776830	0			19.1565	19.2386	18.7369	18.6403	19.2503	19.2027	19.4908	19.2704	19.3195	19.3351	19.5672	B7Z639	0.380633		B7Z639	0.319196	19.1641	3.59857	0.000892533	0.0190781	-0.871218	tr|B7Z639|B7Z639_HUMAN cDNA FLJ54938, weakly similar to Mus musculus transmembrane and tetratricopeptide repeat containing 1 (Tmtc1), mRNA OS=Homo sapiens OX=9606 PE=2 SV=1;tr|A0A0B4J253|A0A0B4J253_HUMAN Protein O-mannosyl-transferase TMTC2 OS=Homo sapiens				B7Z639	0.319196	19.1641	0.633158
2166	2961;20085;23116;29699;37920;41462;42959;42960;43347;43348;44294;47814;47893;51057;52746;54765;58268;61214;66327	A0A3B3ITJ4			tr|A0A3B3ITJ4|A0A3B3ITJ4_HUMAN Heterogeneous nuclear ribonucleoprotein L (Fragment) OS=Homo sapiens OX=9606 GN=HNRNPL PE=1 SV=1	A0A3B3ITJ4	2866000	2465400	2335800	2295500	2373600	2704600	6012300	2541200	2791400	2356700	2861900	0			21.4506	21.2334	21.1555	21.1304	21.1787	21.367	22.5195	21.2771	21.4126	21.1683	21.4485	A0A3B3ITJ4	0.306423		A0A3B3ITJ4	0.319186	21.3893	2.44555	0.0190941	0.076713	-3.66152	tr|A0A3B3ITJ4|A0A3B3ITJ4_HUMAN Heterogeneous nuclear ribonucleoprotein L (Fragment) OS=Homo sapiens OX=9606 GN=HNRNPL PE=1 SV=1				A0A3B3ITJ4	0.319186	21.3893	0.430224
3578	23899;27697;30981;45854;49130;60979	D6RDV0;D6RA37;D6RIY7;Q13454;A0A0A0MTC2	Tumor suppressor candidate 3	TUSC3	tr|D6RDV0|D6RDV0_HUMAN Tumor suppressor candidate 3 OS=Homo sapiens OX=9606 GN=TUSC3 PE=1 SV=1;tr|D6RA37|D6RA37_HUMAN Tumor suppressor candidate 3 OS=Homo sapiens OX=9606 GN=TUSC3 PE=1 SV=1;tr|D6RIY7|D6RIY7_HUMAN Tumor suppressor candidate 3 OS=Homo sapien	D6RDV0	4880100	5297700	3757000	3582300	5537900	5300500	6143100	5494200	5288600	6149500	5689300	0			22.2185	22.3369	21.8411	21.7725	22.4009	22.3377	22.5505	22.3895	22.3345	22.552	22.4398	D6RDV0	0.390585		D6RDV0	0.318854	22.2734	3.60742	0.000870079	0.0187337	-0.847505	tr|D6RDV0|D6RDV0_HUMAN Tumor suppressor candidate 3 OS=Homo sapiens OX=9606 GN=TUSC3 PE=1 SV=1;tr|D6RA37|D6RA37_HUMAN Tumor suppressor candidate 3 OS=Homo sapiens OX=9606 GN=TUSC3 PE=1 SV=1;tr|D6RIY7|D6RIY7_HUMAN Tumor suppressor candidate 3 OS=Homo sapien				D6RDV0	0.318854	22.2734	0.631527
2470	7145;8373;10188;18675;35943;36225;36767;43353;45766;52064;58150;61953	Q59GY3;A8K588;Q13247;V9HVZ0;B5BU15	Serine/arginine-rich splicing factor 6	SRSF6;HEL-S-91;SFRS6	tr|Q59GY3|Q59GY3_HUMAN Arginine/serine-rich splicing factor 6 variant (Fragment) OS=Homo sapiens OX=9606 PE=2 SV=1;tr|A8K588|A8K588_HUMAN cDNA FLJ76823, highly similar to Homo sapiens splicing factor, arginine/serine-rich 6 (SFRS6), mRNA OS=Homo sapiens OX	Q59GY3	9828400	10704000	7840900	7245400	10552000	10826000	13514000	11037000	11263000	10456000	12426000	0			23.2285	23.3516	22.9026	22.7886	23.331	23.368	23.688	23.3958	23.4251	23.3178	23.5669	Q59GY3	0.371094		Q59GY3	0.318462	23.2797	3.68116	0.00070304	0.016628	-0.648903	tr|Q59GY3|Q59GY3_HUMAN Arginine/serine-rich splicing factor 6 variant (Fragment) OS=Homo sapiens OX=9606 PE=2 SV=1;tr|A8K588|A8K588_HUMAN cDNA FLJ76823, highly similar to Homo sapiens splicing factor, arginine/serine-rich 6 (SFRS6), mRNA OS=Homo sapiens OX				Q59GY3	0.318462	23.2797	0.640698
5034	31925;34136;35834;45590;52423	Q05513;B3KUN5;E9PBE1;B7Z7K5;J3KRP7;D6REZ8;D6RAN5;D6RDM0;D6RG01;D6RBD4;F2Z2H9;D6RGG1;D6RAU1;F2Z3C5	Protein kinase C zeta type	PRKCZ	sp|Q05513|KPCZ_HUMAN Protein kinase C zeta type OS=Homo sapiens OX=9606 GN=PRKCZ PE=1 SV=4;tr|B3KUN5|B3KUN5_HUMAN Non-specific serine/threonine protein kinase OS=Homo sapiens OX=9606 PE=2 SV=1;tr|E9PBE1|E9PBE1_HUMAN Protein kinase C zeta type OS=Homo sapie	Q05513	2048700	1849500	1767500	1671500	2052900	2398000	2510300	2329400	2270400	2173200	1835800	0			20.9663	20.8187	20.7533	20.6727	20.9692	21.1934	21.2594	21.1515	21.1145	21.0514	20.808	Q05513	0.351311		Q05513	0.318014	20.995	4.57331	4.78849e-05	0.00349465	1.87817	sp|Q05513|KPCZ_HUMAN Protein kinase C zeta type OS=Homo sapiens OX=9606 GN=PRKCZ PE=1 SV=4;tr|B3KUN5|B3KUN5_HUMAN Non-specific serine/threonine protein kinase OS=Homo sapiens OX=9606 PE=2 SV=1;tr|E9PBE1|E9PBE1_HUMAN Protein kinase C zeta type OS=Homo sapie				Q05513	0.318014	20.995	0.790654
4719	4569;5085;7063;12238;13140;13141;14443;15153;18076;21485;28874;30369;35279;36675;38041;44129;48052;53888;54648;56783;56797;58045;58347;59069;59556;60410;61433;63270;67043;67044	P41250;F8WCK4	Glycine--tRNA ligase	GARS	sp|P41250|GARS_HUMAN Glycine--tRNA ligase OS=Homo sapiens OX=9606 GN=GARS PE=1 SV=3	P41250	48145000	44522000	42501000	38417000	43302000	49791000	56674000	55255000	55019000	53090000	50405000	0			25.5209	25.408	25.341	25.1952	25.3679	25.5694	25.7562	25.7196	25.7134	25.6619	25.5871	P41250	0.317826		P41250	0.317496	25.5254	4.64963	3.77826e-05	0.00302454	2.10258	sp|P41250|GARS_HUMAN Glycine--tRNA ligase OS=Homo sapiens OX=9606 GN=GARS PE=1 SV=3				P41250	0.317496	25.5254	0.797572
3049	21254;28358;29874;37732;65411	B4DH44;P45985;B7ZA62;B7Z9Y5;R4GN37	Dual specificity mitogen-activated protein kinase kinase 4	MAP2K4	tr|B4DH44|B4DH44_HUMAN cDNA FLJ52538, highly similar to Dual specificity mitogen-activated proteinkinase kinase 4 OS=Homo sapiens OX=9606 PE=2 SV=1;sp|P45985|MP2K4_HUMAN Dual specificity mitogen-activated protein kinase kinase 4 OS=Homo sapiens OX=9606 GN=	B4DH44	3527300	3505100	3136600	2825900	3378100	3943300	4184400	4265700	4045500	3904500	3557500	0			21.7501	21.741	21.5808	21.4303	21.6878	21.911	21.9966	22.0243	21.9479	21.8967	21.7624	B4DH44	0.329752		B4DH44	0.317306	21.7966	4.60884	4.28882e-05	0.00326578	1.98252	tr|B4DH44|B4DH44_HUMAN cDNA FLJ52538, highly similar to Dual specificity mitogen-activated proteinkinase kinase 4 OS=Homo sapiens OX=9606 PE=2 SV=1;sp|P45985|MP2K4_HUMAN Dual specificity mitogen-activated protein kinase kinase 4 OS=Homo sapiens OX=9606 GN=				B4DH44	0.317306	21.7966	0.78829
5731	2028;9053;38332;46616	Q7L775	EPM2A-interacting protein 1	EPM2AIP1	sp|Q7L775|EPMIP_HUMAN EPM2A-interacting protein 1 OS=Homo sapiens OX=9606 GN=EPM2AIP1 PE=1 SV=1	Q7L775	936120	962690	723950	683310	931500	1014000	1079700	1051100	1058600	1014800	863050	0			19.8363	19.8767	19.4655	19.3822	19.8292	19.9516	20.0422	20.0035	20.0137	19.9528	19.7191	Q7L775	0.352571		Q7L775	0.314768	19.8354	3.9962	0.00027794	0.0102086	0.219567	sp|Q7L775|EPMIP_HUMAN EPM2A-interacting protein 1 OS=Homo sapiens OX=9606 GN=EPM2AIP1 PE=1 SV=1				Q7L775	0.314768	19.8354	0.656794
6713	35267;56807	Q9NZJ6	Ubiquinone biosynthesis O-methyltransferase, mitochondrial	COQ3	sp|Q9NZJ6|COQ3_HUMAN Ubiquinone biosynthesis O-methyltransferase, mitochondrial OS=Homo sapiens OX=9606 GN=COQ3 PE=1 SV=3	Q9NZJ6	310610	279670	261040	264820	277600	318920	369180	355380	350150	337660	383000	0			18.2447	18.0934	17.9939	18.0146	18.0827	18.2828	18.494	18.439	18.4176	18.3652	18.547	Q9NZJ6	0.313056		Q9NZJ6	0.31386	18.2428	4.65883	3.67163e-05	0.00297736	2.1297	sp|Q9NZJ6|COQ3_HUMAN Ubiquinone biosynthesis O-methyltransferase, mitochondrial OS=Homo sapiens OX=9606 GN=COQ3 PE=1 SV=3				Q9NZJ6	0.31386	18.2428	0.754437
786	5614;50864	F5GZS4;F5H095;A0A024R8W1;A4ZI32;Q0VG06	Fanconi anemia-associated protein of 100 kDa	C17orf70;FAAP100	tr|F5GZS4|F5GZS4_HUMAN Fanconi anemia core complex-associated protein 100 (Fragment) OS=Homo sapiens OX=9606 GN=FAAP100 PE=1 SV=1;tr|F5H095|F5H095_HUMAN Fanconi anemia core complex-associated protein 100 (Fragment) OS=Homo sapiens OX=9606 GN=FAAP100 PE=1 S	F5GZS4	571760	617630	448980	405430	606480	610380	713370	669390	641110	614920	660740	0			19.1251	19.2364	18.7763	18.6291	19.2101	19.2193	19.4443	19.3525	19.2902	19.23	19.3337	F5GZS4	0.365573		F5GZS4	0.311894	19.1513	3.63742	0.000797949	0.0176681	-0.766925	tr|F5GZS4|F5GZS4_HUMAN Fanconi anemia core complex-associated protein 100 (Fragment) OS=Homo sapiens OX=9606 GN=FAAP100 PE=1 SV=1;tr|F5H095|F5H095_HUMAN Fanconi anemia core complex-associated protein 100 (Fragment) OS=Homo sapiens OX=9606 GN=FAAP100 PE=1 S				F5GZS4	0.311894	19.1513	0.569819
985	16032	F8VSL3;A0A024RBG7;P25208	Nuclear transcription factor Y subunit beta	NFYB	tr|F8VSL3|F8VSL3_HUMAN Nuclear transcription factor Y subunit beta OS=Homo sapiens OX=9606 GN=NFYB PE=1 SV=2;tr|A0A024RBG7|A0A024RBG7_HUMAN Nuclear transcription factor Y, beta, isoform CRA_c OS=Homo sapiens OX=9606 GN=NFYB PE=4 SV=1;sp|P25208|NFYB_HUMAN N	F8VSL3	367940	350370	339170	302770	352060	426720	455590	419900	408900	410990	391970	0			18.4891	18.4185	18.3716	18.2079	18.4255	18.7029	18.7974	18.6797	18.6414	18.6487	18.5804	F8VSL3	0.322241		F8VSL3	0.311506	18.5383	4.64245	3.86348e-05	0.00305362	2.08145	tr|F8VSL3|F8VSL3_HUMAN Nuclear transcription factor Y subunit beta OS=Homo sapiens OX=9606 GN=NFYB PE=1 SV=2;tr|A0A024RBG7|A0A024RBG7_HUMAN Nuclear transcription factor Y, beta, isoform CRA_c OS=Homo sapiens OX=9606 GN=NFYB PE=4 SV=1;sp|P25208|NFYB_HUMAN N				F8VSL3	0.311506	18.5383	0.722385
4315	17693;33335;59362	O75558	Syntaxin-11	STX11	sp|O75558|STX11_HUMAN Syntaxin-11 OS=Homo sapiens OX=9606 GN=STX11 PE=1 SV=1	O75558	1111500	953460	945060	875310	1025100	1180700	1640800	1120400	1077700	1130500	918970	0			20.0841	19.8628	19.85	19.7394	19.9673	20.1712	20.646	20.0956	20.0395	20.1085	19.8097	O75558	0.328067		O75558	0.31142	20.0565	3.69954	0.000666494	0.01632	-0.599113	sp|O75558|STX11_HUMAN Syntaxin-11 OS=Homo sapiens OX=9606 GN=STX11 PE=1 SV=1				O75558	0.31142	20.0565	0.5748
5613	8667;11630;21883;25861;36925;36995;47389	Q6IN84;A0A087WZC1	rRNA methyltransferase 1, mitochondrial	MRM1	sp|Q6IN84|MRM1_HUMAN rRNA methyltransferase 1, mitochondrial OS=Homo sapiens OX=9606 GN=MRM1 PE=1 SV=1	Q6IN84	2189900	2136700	2012600	1931000	2265100	2619900	2719500	2578100	2543300	2589600	2888600	0			21.0624	21.0269	20.9406	20.8809	21.1111	21.3211	21.3749	21.2979	21.2783	21.3043	21.4619	Q6IN84	0.337556		Q6IN84	0.310874	21.1599	4.74805	2.77996e-05	0.00245666	2.39341	sp|Q6IN84|MRM1_HUMAN rRNA methyltransferase 1, mitochondrial OS=Homo sapiens OX=9606 GN=MRM1 PE=1 SV=1				Q6IN84	0.310874	21.1599	0.730665
3457	1105;22627;22628;32766;41548;57049;57058	C9JFR7;G4XXL9;P99999;Q6LER6;CON__P62894	Cytochrome c	CYCS	tr|C9JFR7|C9JFR7_HUMAN Cytochrome c (Fragment) OS=Homo sapiens OX=9606 GN=CYCS PE=1 SV=1;tr|G4XXL9|G4XXL9_HUMAN Cytochrome c OS=Homo sapiens OX=9606 GN=CYCS PE=3 SV=1;sp|P99999|CYC_HUMAN Cytochrome c OS=Homo sapiens OX=9606 GN=CYCS PE=1 SV=2	C9JFR7	43060000	45968000	36381000	35044000	52902000	53129000	55447000	51062000	49988000	52106000	72168000	0			25.3598	25.4541	25.1167	25.0627	25.6568	25.663	25.7246	25.6058	25.5751	25.6349	26.1049	C9JFR7	0.39235		C9JFR7	0.310652	25.4854	3.85906	0.000417648	0.0125375	-0.162258	tr|C9JFR7|C9JFR7_HUMAN Cytochrome c (Fragment) OS=Homo sapiens OX=9606 GN=CYCS PE=1 SV=1;tr|G4XXL9|G4XXL9_HUMAN Cytochrome c OS=Homo sapiens OX=9606 GN=CYCS PE=3 SV=1;sp|P99999|CYC_HUMAN Cytochrome c OS=Homo sapiens OX=9606 GN=CYCS PE=1 SV=2				C9JFR7	0.310652	25.4854	0.591527
2558	9408;61777;64133	E9PEI0;A8K8Z0;Q69YH5;B7Z5Q5	Cell division cycle-associated protein 2	CDCA2	tr|E9PEI0|E9PEI0_HUMAN Cell division cycle-associated protein 2 OS=Homo sapiens OX=9606 GN=CDCA2 PE=1 SV=1;tr|A8K8Z0|A8K8Z0_HUMAN cDNA FLJ78763 OS=Homo sapiens OX=9606 PE=2 SV=1;sp|Q69YH5|CDCA2_HUMAN Cell division cycle-associated protein 2 OS=Homo sapiens	E9PEI0	374230	359500	345920	319790	405190	412010	422210	394180	580480	440930	349500	0			18.5136	18.4556	18.4001	18.2868	18.6282	18.6523	18.6876	18.5885	19.1469	18.7502	18.4149	E9PEI0	0.351087		E9PEI0	0.308242	18.611	3.80666	0.000487337	0.0135845	-0.306665	tr|E9PEI0|E9PEI0_HUMAN Cell division cycle-associated protein 2 OS=Homo sapiens OX=9606 GN=CDCA2 PE=1 SV=1;tr|A8K8Z0|A8K8Z0_HUMAN cDNA FLJ78763 OS=Homo sapiens OX=9606 PE=2 SV=1;sp|Q69YH5|CDCA2_HUMAN Cell division cycle-associated protein 2 OS=Homo sapiens				E9PEI0	0.308242	18.611	0.558294
67	54378	Q9UQL0;A0A087WW00;C9J9H9;A0A024RA90;A0A024QZJ2;Q9Y2X8;P51668	Ubiquitin-conjugating enzyme E2 D4;Ubiquitin-conjugating enzyme E2 D1	UBE2D4;UBE2D1	tr|Q9UQL0|Q9UQL0_HUMAN Ubiquitin-conjugating enzyme 1 isoform OS=Homo sapiens OX=9606 GN=UBE2D4 PE=2 SV=1;tr|A0A087WW00|A0A087WW00_HUMAN Ubiquitin-conjugating enzyme E2 D1 OS=Homo sapiens OX=9606 GN=UBE2D1 PE=1 SV=1;tr|C9J9H9|C9J9H9_HUMAN Ubiquitin-conjuga	Q9UQL0	1582500	1542800	1438700	1229200	1625900	1775500	1729000	1892100	1815900	1931300	1419600	0			20.5938	20.5571	20.4563	20.2293	20.6328	20.7598	20.7215	20.8516	20.7922	20.8811	20.437	Q9UQL0	0.34212		Q9UQL0	0.307384	20.6476	4.29234	0.00011365	0.00625833	1.06129	tr|Q9UQL0|Q9UQL0_HUMAN Ubiquitin-conjugating enzyme 1 isoform OS=Homo sapiens OX=9606 GN=UBE2D4 PE=2 SV=1;tr|A0A087WW00|A0A087WW00_HUMAN Ubiquitin-conjugating enzyme E2 D1 OS=Homo sapiens OX=9606 GN=UBE2D1 PE=1 SV=1;tr|C9J9H9|C9J9H9_HUMAN Ubiquitin-conjuga				Q9UQL0	0.307384	20.6476	0.619302
3451	15988;19302;28601;28974;36894;49375;53335;57806;64244	C9JA93;F8VV61		TBC1D15	tr|C9JA93|C9JA93_HUMAN TBC1 domain family member 15 (Fragment) OS=Homo sapiens OX=9606 GN=TBC1D15 PE=1 SV=1	C9JA93	72247	67255	61236	64277	74800	84297	88524	82110	88122	76880	74571	0			16.1407	16.0373	15.9021	15.972	16.1908	16.3632	16.4338	16.3253	16.4272	16.2303	16.1863	C9JA93	0.342927		C9JA93	0.307382	16.2023	4.46452	6.70244e-05	0.00437499	1.56004	tr|C9JA93|C9JA93_HUMAN TBC1 domain family member 15 (Fragment) OS=Homo sapiens OX=9606 GN=TBC1D15 PE=1 SV=1				C9JA93	0.307382	16.2023	0.64412
2995	65243	G5E9Z4;B4DJZ0;B3KY39;Q8TCG2	Phosphatidylinositol 4-kinase type 2-beta	PI4K2B	tr|G5E9Z4|G5E9Z4_HUMAN Phosphatidylinositol 4-kinase type 2-beta OS=Homo sapiens OX=9606 GN=PI4K2B PE=4 SV=1;tr|B4DJZ0|B4DJZ0_HUMAN cDNA FLJ58191, highly similar to Homo sapiens phosphatidylinositol 4-kinase type 2 beta (PI4K2B), mRNA OS=Homo sapiens OX=96	G5E9Z4	96447	110260	89147	95509	131990	170590	101910	99797	178650	111770	97675	0			16.5574	16.7506	16.4439	16.5434	17.0101	17.3802	16.6369	16.6067	17.4468	16.7702	16.5757	G5E9Z4	0.394341		G5E9Z4	0.30709	16.8146	2.70091	0.010189	0.0591166	-3.1026	tr|G5E9Z4|G5E9Z4_HUMAN Phosphatidylinositol 4-kinase type 2-beta OS=Homo sapiens OX=9606 GN=PI4K2B PE=4 SV=1;tr|B4DJZ0|B4DJZ0_HUMAN cDNA FLJ58191, highly similar to Homo sapiens phosphatidylinositol 4-kinase type 2 beta (PI4K2B), mRNA OS=Homo sapiens OX=96				G5E9Z4	0.30709	16.8146	0.387476
1694	6861;10241;32957;43592;52649;61915	F6XEV2;A0A0U1RRK1;A0A286YF11;Q9BPX6;S4R3D7;S4R3V1;S4R3W3;E9PQV6	Calcium uptake protein 1, mitochondrial	MICU1	tr|F6XEV2|F6XEV2_HUMAN Calcium uptake protein 1, mitochondrial OS=Homo sapiens OX=9606 GN=MICU1 PE=1 SV=2;tr|A0A0U1RRK1|A0A0U1RRK1_HUMAN Calcium uptake protein 1, mitochondrial OS=Homo sapiens OX=9606 GN=MICU1 PE=1 SV=1;tr|A0A286YF11|A0A286YF11_HUMAN Calci	F6XEV2	1499000	1287300	1314400	1215300	1447000	1633000	1753200	1708000	1682400	1567700	1480500	0			20.5156	20.2959	20.326	20.2129	20.4646	20.6391	20.7416	20.7039	20.6821	20.5802	20.4977	F6XEV2	0.331783		F6XEV2	0.306374	20.5162	4.48213	6.34835e-05	0.00435422	1.61136	tr|F6XEV2|F6XEV2_HUMAN Calcium uptake protein 1, mitochondrial OS=Homo sapiens OX=9606 GN=MICU1 PE=1 SV=2;tr|A0A0U1RRK1|A0A0U1RRK1_HUMAN Calcium uptake protein 1, mitochondrial OS=Homo sapiens OX=9606 GN=MICU1 PE=1 SV=1;tr|A0A286YF11|A0A286YF11_HUMAN Calci				F6XEV2	0.306374	20.5162	0.634041
3856	13882;48595;57210;57904	G8JLQ3;P78537;F8W099;F8W606;A0A087WSV2;F8W036;F8VP73	Biogenesis of lysosome-related organelles complex 1 subunit 1	BLOC1S1	tr|G8JLQ3|G8JLQ3_HUMAN Biogenesis of lysosome-related organelles complex 1 subunit 1 OS=Homo sapiens OX=9606 GN=BLOC1S1 PE=1 SV=1;sp|P78537|BL1S1_HUMAN Biogenesis of lysosome-related organelles complex 1 subunit 1 OS=Homo sapiens OX=9606 GN=BLOC1S1 PE=1 SV	G8JLQ3	1353800	1315600	1132700	1070800	1333000	1511500	1559000	1487100	1607400	1476800	1354000	0			20.3686	20.3273	20.1113	20.0303	20.3462	20.5276	20.5722	20.5041	20.6163	20.494	20.3688	G8JLQ3	0.333465		G8JLQ3	0.30609	20.3898	4.34212	9.76128e-05	0.00560081	1.20484	tr|G8JLQ3|G8JLQ3_HUMAN Biogenesis of lysosome-related organelles complex 1 subunit 1 OS=Homo sapiens OX=9606 GN=BLOC1S1 PE=1 SV=1;sp|P78537|BL1S1_HUMAN Biogenesis of lysosome-related organelles complex 1 subunit 1 OS=Homo sapiens OX=9606 GN=BLOC1S1 PE=1 SV				G8JLQ3	0.30609	20.3898	0.610776
4333	5324;16284;16285;16644;29079	O75884	Putative hydrolase RBBP9	RBBP9	sp|O75884|RBBP9_HUMAN Putative hydrolase RBBP9 OS=Homo sapiens OX=9606 GN=RBBP9 PE=1 SV=2	O75884	1502900	1146400	1128900	1157500	1235500	1462400	1647300	1462100	1647700	1383700	1202800	0			20.5193	20.1287	20.1065	20.1426	20.2367	20.4799	20.6517	20.4796	20.652	20.4001	20.198	O75884	0.308394		O75884	0.305916	20.3797	4.08491	0.000213056	0.00854647	0.469362	sp|O75884|RBBP9_HUMAN Putative hydrolase RBBP9 OS=Homo sapiens OX=9606 GN=RBBP9 PE=1 SV=2				O75884	0.305916	20.3797	0.5726
4078	23054;47909	L0R6H6;Q6EEV4	DNA-directed RNA polymerase II subunit GRINL1A, isoforms 4/5	GRINL1A;POLR2M	tr|L0R6H6|L0R6H6_HUMAN Alternative protein GRINL1A OS=Homo sapiens OX=9606 GN=GRINL1A PE=4 SV=1;sp|Q6EEV4|GL1AD_HUMAN DNA-directed RNA polymerase II subunit GRINL1A, isoforms 4/5 OS=Homo sapiens OX=9606 GN=POLR2M PE=1 SV=1	L0R6H6	1141100	1147800	868490	804470	1153100	1193600	1263900	1260500	1257500	1272600	1176200	0			20.122	20.1304	19.7281	19.6177	20.1371	20.1869	20.2694	20.2656	20.2621	20.2794	20.1657	L0R6H6	0.353111		L0R6H6	0.305606	20.0999	3.76912	0.000544046	0.0144501	-0.409572	tr|L0R6H6|L0R6H6_HUMAN Alternative protein GRINL1A OS=Homo sapiens OX=9606 GN=GRINL1A PE=4 SV=1;sp|Q6EEV4|GL1AD_HUMAN DNA-directed RNA polymerase II subunit GRINL1A, isoforms 4/5 OS=Homo sapiens OX=9606 GN=POLR2M PE=1 SV=1				L0R6H6	0.305606	20.0999	0.525047
4014	49441;59676;60259;65598	J3KRC4;V9HWF3;Q8TCD5;A0A384NYP3;J3KSY6;J3KSX6	5(3)-deoxyribonucleotidase, cytosolic type	NT5C;HEL74	tr|J3KRC4|J3KRC4_HUMAN 5(3)-deoxyribonucleotidase, cytosolic type OS=Homo sapiens OX=9606 GN=NT5C PE=1 SV=1;tr|V9HWF3|V9HWF3_HUMAN Epididymis luminal protein 74 OS=Homo sapiens OX=9606 GN=HEL74 PE=2 SV=1;sp|Q8TCD5|NT5C_HUMAN 5(3)-deoxyribonucleotidase,	J3KRC4	717580	979480	648460	561070	715530	782630	921870	932120	889970	878560	905000	0			19.4528	19.9017	19.3067	19.0978	19.4487	19.578	19.8142	19.8302	19.7634	19.7448	19.7876	J3KRC4	0.306372		J3KRC4	0.304588	19.5938	3.43296	0.00143097	0.0253116	-1.30948	tr|J3KRC4|J3KRC4_HUMAN 5(3)-deoxyribonucleotidase, cytosolic type OS=Homo sapiens OX=9606 GN=NT5C PE=1 SV=1;tr|V9HWF3|V9HWF3_HUMAN Epididymis luminal protein 74 OS=Homo sapiens OX=9606 GN=HEL74 PE=2 SV=1;sp|Q8TCD5|NT5C_HUMAN 5(3)-deoxyribonucleotidase,				J3KRC4	0.304588	19.5938	0.468344
2801	15334;21756;33980;42462;60190	Q5VUC6;B4DHU9;B3KT39;B2RCF3;Q5VUC7;O60551;B4DXS1	Glycylpeptide N-tetradecanoyltransferase;Glycylpeptide N-tetradecanoyltransferase 2	NMT2	tr|Q5VUC6|Q5VUC6_HUMAN Glycylpeptide N-tetradecanoyltransferase OS=Homo sapiens OX=9606 GN=NMT2 PE=1 SV=1;tr|B4DHU9|B4DHU9_HUMAN Glycylpeptide N-tetradecanoyltransferase OS=Homo sapiens OX=9606 PE=2 SV=1;tr|B3KT39|B3KT39_HUMAN Glycylpeptide N-tetradecanoyl	Q5VUC6	733570	695880	617470	565820	764860	865280	862330	814470	757880	850210	552280	0			19.4846	19.4085	19.236	19.11	19.5448	19.7228	19.7179	19.6355	19.5316	19.6975	19.075	Q5VUC6	0.35129		Q5VUC6	0.304274	19.5089	4.11151	0.000196659	0.00818627	0.544682	tr|Q5VUC6|Q5VUC6_HUMAN Glycylpeptide N-tetradecanoyltransferase OS=Homo sapiens OX=9606 GN=NMT2 PE=1 SV=1;tr|B4DHU9|B4DHU9_HUMAN Glycylpeptide N-tetradecanoyltransferase OS=Homo sapiens OX=9606 PE=2 SV=1;tr|B3KT39|B3KT39_HUMAN Glycylpeptide N-tetradecanoyl				Q5VUC6	0.304274	19.5089	0.557251
1357	12319;20823;21859;41211;43879;49365;61169	A0A0A0MQW0;A0A0A0MR39;Q9P2K5;Q9Y655;A0A087WUT0;A0A024R5Q6;A0A087WWC8;A0A0C4DGV1;H0YN19;H0YKS1	Myelin expression factor 2	MYEF2	tr|A0A0A0MQW0|A0A0A0MQW0_HUMAN Myelin expression factor 2 OS=Homo sapiens OX=9606 GN=MYEF2 PE=1 SV=1;tr|A0A0A0MR39|A0A0A0MR39_HUMAN Myelin expression factor 2 OS=Homo sapiens OX=9606 GN=MYEF2 PE=1 SV=1;sp|Q9P2K5|MYEF2_HUMAN Myelin expression factor 2 OS=Ho	A0A0A0MQW0	1021400	870430	863490	774470	835460	968700	1150700	1126700	1086600	1044600	1162900	0			19.9621	19.7314	19.7198	19.5629	19.6722	19.8857	20.1341	20.1037	20.0514	19.9945	20.1493	A0A0A0MQW0	0.28983		A0A0A0MQW0	0.304196	19.8818	4.23838	0.000133946	0.0068654	0.906336	tr|A0A0A0MQW0|A0A0A0MQW0_HUMAN Myelin expression factor 2 OS=Homo sapiens OX=9606 GN=MYEF2 PE=1 SV=1;tr|A0A0A0MR39|A0A0A0MR39_HUMAN Myelin expression factor 2 OS=Homo sapiens OX=9606 GN=MYEF2 PE=1 SV=1;sp|Q9P2K5|MYEF2_HUMAN Myelin expression factor 2 OS=Ho				A0A0A0MQW0	0.304196	19.8818	0.573507
6874	4691;18998;64033	Q9Y2Q5	Ragulator complex protein LAMTOR2	LAMTOR2	sp|Q9Y2Q5|LTOR2_HUMAN Ragulator complex protein LAMTOR2 OS=Homo sapiens OX=9606 GN=LAMTOR2 PE=1 SV=1	Q9Y2Q5	267110	240070	243400	197070	260360	241200	324610	345340	301810	280940	176260	0			18.0271	17.8731	17.893	17.5883	17.9901	17.8799	18.3084	18.3977	18.2033	18.0999	17.4274	Q9Y2Q5	0.33244		Q9Y2Q5	0.303484	18.0261	3.69298	0.000679309	0.0163769	-0.616879	sp|Q9Y2Q5|LTOR2_HUMAN Ragulator complex protein LAMTOR2 OS=Homo sapiens OX=9606 GN=LAMTOR2 PE=1 SV=1				Q9Y2Q5	0.303484	18.0261	0.492216
1163	2026;3732;7000;15762;18645;52308;59407;64849	B3KRY3;A0A024RDY3;P11279;Q59FZ0	Lysosome-associated membrane glycoprotein 1	LAMP1	tr|B3KRY3|B3KRY3_HUMAN cDNA FLJ35079 fis, clone PLACE6005283, highly similar to Lysosome-associated membrane glycoprotein 1 OS=Homo sapiens OX=9606 PE=2 SV=1;tr|A0A024RDY3|A0A024RDY3_HUMAN Lysosomal-associated membrane protein 1, isoform CRA_a OS=Homo sapi	B3KRY3	5860900	4960300	4999200	4681000	5196600	6009800	6652100	6432700	6365100	6172700	7587800	0			22.4827	22.242	22.2533	22.1584	22.3091	22.5189	22.6654	22.617	22.6017	22.5575	22.8553	B3KRY3	0.308006		B3KRY3	0.302996	22.4406	4.46394	6.71458e-05	0.00437499	1.55833	tr|B3KRY3|B3KRY3_HUMAN cDNA FLJ35079 fis, clone PLACE6005283, highly similar to Lysosome-associated membrane glycoprotein 1 OS=Homo sapiens OX=9606 PE=2 SV=1;tr|A0A024RDY3|A0A024RDY3_HUMAN Lysosomal-associated membrane protein 1, isoform CRA_a OS=Homo sapi				B3KRY3	0.302996	22.4406	0.58874
3192	20414	B4DTR1;J3QLU9;X5DNK3;P04626	Receptor protein-tyrosine kinase;Receptor tyrosine-protein kinase erbB-2	ERBB2	tr|B4DTR1|B4DTR1_HUMAN Receptor protein-tyrosine kinase OS=Homo sapiens OX=9606 GN=ERBB2 PE=1 SV=1;tr|J3QLU9|J3QLU9_HUMAN Receptor protein-tyrosine kinase OS=Homo sapiens OX=9606 GN=ERBB2 PE=1 SV=1;tr|X5DNK3|X5DNK3_HUMAN Receptor protein-tyrosine kinase (F	B4DTR1	82867	74326	58324	54651	68689	79600	94324	81068	74982	84255	41547	0			16.3385	16.1816	15.8318	15.738	16.0678	16.2805	16.5253	16.3068	16.1943	16.3625	15.3425	B4DTR1	0.311415		B4DTR1	0.30235	16.1827	3.6112	0.000860672	0.0186598	-0.837386	tr|B4DTR1|B4DTR1_HUMAN Receptor protein-tyrosine kinase OS=Homo sapiens OX=9606 GN=ERBB2 PE=1 SV=1;tr|J3QLU9|J3QLU9_HUMAN Receptor protein-tyrosine kinase OS=Homo sapiens OX=9606 GN=ERBB2 PE=1 SV=1;tr|X5DNK3|X5DNK3_HUMAN Receptor protein-tyrosine kinase (F				B4DTR1	0.30235	16.1827	0.469576
6227	6442;13030;33686;34984;56112;67566	Q96J01;D6RGZ2;D6REC9	THO complex subunit 3	THOC3	sp|Q96J01|THOC3_HUMAN THO complex subunit 3 OS=Homo sapiens OX=9606 GN=THOC3 PE=1 SV=1;tr|D6RGZ2|D6RGZ2_HUMAN THO complex subunit 3 OS=Homo sapiens OX=9606 GN=THOC3 PE=1 SV=1	Q96J01	4884700	4995100	4364700	4371500	6097400	6873400	6884500	5663000	5470000	5511400	4584200	0			22.2198	22.2521	22.0574	22.0597	22.5398	22.7126	22.7149	22.4331	22.3831	22.394	22.1282	Q96J01	0.380282		Q96J01	0.301784	22.3767	3.6936	0.000678104	0.0163769	-0.615223	sp|Q96J01|THOC3_HUMAN THO complex subunit 3 OS=Homo sapiens OX=9606 GN=THOC3 PE=1 SV=1;tr|D6RGZ2|D6RGZ2_HUMAN THO complex subunit 3 OS=Homo sapiens OX=9606 GN=THOC3 PE=1 SV=1				Q96J01	0.301784	22.3767	0.474264
749	10445;17979;26267;30478;33338;60204;64520	A0A024R8H6;Q15059;B4DS09;A0A140F1N4;W8JJB1;H0YDJ7;U3KPW0;Q58F21	Bromodomain-containing protein 3	BRD3	tr|A0A024R8H6|A0A024R8H6_HUMAN Bromodomain containing 3, isoform CRA_a OS=Homo sapiens OX=9606 GN=BRD3 PE=4 SV=1;sp|Q15059|BRD3_HUMAN Bromodomain-containing protein 3 OS=Homo sapiens OX=9606 GN=BRD3 PE=1 SV=1;tr|B4DS09|B4DS09_HUMAN cDNA FLJ61365, highly si	A0A024R8H6	3558900	3118700	2780900	2579700	3053100	3440800	3828800	3797900	3775600	3658400	3210100	0			21.763	21.5725	21.4071	21.2988	21.5418	21.7143	21.8685	21.8568	21.8483	21.8028	21.6142	A0A024R8H6	0.307768		A0A024R8H6	0.30147	21.6674	4.13538	0.000182998	0.00790051	0.612428	tr|A0A024R8H6|A0A024R8H6_HUMAN Bromodomain containing 3, isoform CRA_a OS=Homo sapiens OX=9606 GN=BRD3 PE=4 SV=1;sp|Q15059|BRD3_HUMAN Bromodomain-containing protein 3 OS=Homo sapiens OX=9606 GN=BRD3 PE=1 SV=1;tr|B4DS09|B4DS09_HUMAN cDNA FLJ61365, highly si				A0A024R8H6	0.30147	21.6674	0.527236
488	46346;67189	A0A024R593;Q15173;E9PNY3;Q59G20	Serine/threonine-protein phosphatase 2A 56 kDa regulatory subunit beta isoform	PPP2R5B	tr|A0A024R593|A0A024R593_HUMAN Serine/threonine-protein phosphatase 2A 56 kDa regulatory subunit OS=Homo sapiens OX=9606 GN=PPP2R5B PE=3 SV=1;sp|Q15173|2A5B_HUMAN Serine/threonine-protein phosphatase 2A 56 kDa regulatory subunit beta isoform OS=Homo sapien	A0A024R593	169760	187520	156290	149460	176540	210400	199960	194360	238000	191410	155600	0			17.3731	17.5167	17.2539	17.1894	17.4296	17.6828	17.6093	17.5684	17.8606	17.5463	17.2475	A0A024R593	0.320207		A0A024R593	0.300934	17.503	4.15125	0.000174437	0.00772473	0.657523	tr|A0A024R593|A0A024R593_HUMAN Serine/threonine-protein phosphatase 2A 56 kDa regulatory subunit OS=Homo sapiens OX=9606 GN=PPP2R5B PE=3 SV=1;sp|Q15173|2A5B_HUMAN Serine/threonine-protein phosphatase 2A 56 kDa regulatory subunit beta isoform OS=Homo sapien				A0A024R593	0.300934	17.503	0.522807
3559	2085;3943;5050;5721;8076;10662;12180;14945;16478;19415;23445;24746;28654;28696;34104;35289;36024;37157;42114;44176;45810;45924;46098;46323;46785;46786;47116;47986;51637;53196;53955;55539;61898;64285;66460;67047	D3DVA5;V9GYM8;Q92974;B4DJ49;B7Z977;V9GYF0;Q5VY93;V9GZ14;V9GYF5;V9GYG5;V9GZ58	Rho guanine nucleotide exchange factor 2	ARHGEF2	tr|D3DVA5|D3DVA5_HUMAN Rho/rac guanine nucleotide exchange factor (GEF) 2, isoform CRA_a OS=Homo sapiens OX=9606 GN=ARHGEF2 PE=4 SV=1;tr|V9GYM8|V9GYM8_HUMAN Rho guanine nucleotide exchange factor 2 OS=Homo sapiens OX=9606 GN=ARHGEF2 PE=1 SV=1;sp|Q92974|ARH	D3DVA5	38850000	36486000	33245000	30839000	36433000	41137000	45381000	44098000	43588000	41854000	37855000	0			25.2114	25.1208	24.9866	24.8783	25.1187	25.2939	25.4356	25.3942	25.3774	25.3189	25.174	D3DVA5	0.314721		D3DVA5	0.30083	25.2136	4.38097	8.6657e-05	0.00524744	1.31726	tr|D3DVA5|D3DVA5_HUMAN Rho/rac guanine nucleotide exchange factor (GEF) 2, isoform CRA_a OS=Homo sapiens OX=9606 GN=ARHGEF2 PE=4 SV=1;tr|V9GYM8|V9GYM8_HUMAN Rho guanine nucleotide exchange factor 2 OS=Homo sapiens OX=9606 GN=ARHGEF2 PE=1 SV=1;sp|Q92974|ARH				D3DVA5	0.30083	25.2136	0.550415
6948	2521;22858;24794;25232;31395;31396;33990;34814;42576;43903;57642;66808	Q9Y5S1;H7BZK2;B3KMH7;K7EPY7;K7EKG5	Transient receptor potential cation channel subfamily V member 2	TRPV2	sp|Q9Y5S1|TRPV2_HUMAN Transient receptor potential cation channel subfamily V member 2 OS=Homo sapiens OX=9606 GN=TRPV2 PE=1 SV=1	Q9Y5S1	104740	91943	93360	87203	102850	109810	118790	109520	152490	104980	270490	0			16.6764	16.4885	16.5105	16.4121	16.6502	16.7447	16.858	16.7408	17.2184	16.6797	18.0452	Q9Y5S1	0.326452		Q9Y5S1	0.300792	16.6979	3.78213	0.000523705	0.0140502	-0.37396	sp|Q9Y5S1|TRPV2_HUMAN Transient receptor potential cation channel subfamily V member 2 OS=Homo sapiens OX=9606 GN=TRPV2 PE=1 SV=1				Q9Y5S1	0.300792	16.6979	0.47476
898	16709;20171;61427;65899	Q658P3;A0A024RAD7;B8ZZX6	Metalloreductase STEAP3	STEAP3	sp|Q658P3|STEA3_HUMAN Metalloreductase STEAP3 OS=Homo sapiens OX=9606 GN=STEAP3 PE=1 SV=2;tr|A0A024RAD7|A0A024RAD7_HUMAN STEAP family member 3, isoform CRA_b OS=Homo sapiens OX=9606 GN=STEAP3 PE=4 SV=1;tr|B8ZZX6|B8ZZX6_HUMAN Metalloreductase STEAP3 OS=Homo	Q658P3	1142400	1030600	910980	884700	1098500	1232400	1269500	1267700	1228500	1210700	1291700	0			20.1236	19.975	19.7971	19.7548	20.0671	20.233	20.2758	20.2738	20.2285	20.2074	20.3008	Q658P3	0.331061		Q658P3	0.30017	20.0936	4.24474	0.000131382	0.00683624	0.924559	sp|Q658P3|STEA3_HUMAN Metalloreductase STEAP3 OS=Homo sapiens OX=9606 GN=STEAP3 PE=1 SV=2;tr|A0A024RAD7|A0A024RAD7_HUMAN STEAP family member 3, isoform CRA_b OS=Homo sapiens OX=9606 GN=STEAP3 PE=4 SV=1;tr|B8ZZX6|B8ZZX6_HUMAN Metalloreductase STEAP3 OS=Homo				Q658P3	0.30017	20.0936	0.525139
4046	1190;20899	K7EIJ1;Q53EY2;Q9H777;E7EUB6;K7EPH7	Zinc phosphodiesterase ELAC protein 1	ELAC1	tr|K7EIJ1|K7EIJ1_HUMAN Zinc phosphodiesterase ELAC protein 1 OS=Homo sapiens OX=9606 GN=ELAC1 PE=1 SV=1;tr|Q53EY2|Q53EY2_HUMAN ElaC homolog 1 variant (Fragment) OS=Homo sapiens OX=9606 PE=2 SV=1;sp|Q9H777|RNZ1_HUMAN Zinc phosphodiesterase ELAC protein 1 OS	K7EIJ1	504450	411730	444670	380630	397330	412190	478470	483910	533730	775500	464860	0			18.9444	18.6513	18.7624	18.538	18.6	18.653	18.8681	18.8844	19.0257	19.5648	18.8264	K7EIJ1	0.275161		K7EIJ1	0.29997	18.8492	3.03474	0.00427823	0.0425191	-2.31691	tr|K7EIJ1|K7EIJ1_HUMAN Zinc phosphodiesterase ELAC protein 1 OS=Homo sapiens OX=9606 GN=ELAC1 PE=1 SV=1;tr|Q53EY2|Q53EY2_HUMAN ElaC homolog 1 variant (Fragment) OS=Homo sapiens OX=9606 PE=2 SV=1;sp|Q9H777|RNZ1_HUMAN Zinc phosphodiesterase ELAC protein 1 OS				K7EIJ1	0.29997	18.8492	0.37367
2962	7684;32468;39515;46597;52780	C9IZC6;B3KU73;B7Z682;Q13796;F5H3B6;Q68DU3	Protein Shroom2	SHROOM2;DKFZp781J074	tr|C9IZC6|C9IZC6_HUMAN Protein Shroom2 (Fragment) OS=Homo sapiens OX=9606 GN=SHROOM2 PE=1 SV=1;tr|B3KU73|B3KU73_HUMAN cDNA FLJ39277 fis, clone OCBBF2010858, highly similar to APICAL-LIKE PROTEIN OS=Homo sapiens OX=9606 PE=2 SV=1;tr|B7Z682|B7Z682_HUMAN cDNA	C9IZC6	1606900	1503300	1435300	1261200	1567100	1701500	1706600	1696900	1728800	2274900	1377300	0			20.6158	20.5197	20.4529	20.2664	20.5797	20.6984	20.7027	20.6945	20.7213	21.1174	20.3934	C9IZC6	0.32314		C9IZC6	0.299948	20.6369	3.85069	0.000428095	0.0126086	-0.185389	tr|C9IZC6|C9IZC6_HUMAN Protein Shroom2 (Fragment) OS=Homo sapiens OX=9606 GN=SHROOM2 PE=1 SV=1;tr|B3KU73|B3KU73_HUMAN cDNA FLJ39277 fis, clone OCBBF2010858, highly similar to APICAL-LIKE PROTEIN OS=Homo sapiens OX=9606 PE=2 SV=1;tr|B7Z682|B7Z682_HUMAN cDNA				C9IZC6	0.299948	20.6369	0.473891
5218	8845;16074;20186;26845;36412;39105;41643;41740;48095;48226;48904;49025;55107;59086;67405	Q15007;A8K489;A0A087X1R4;Q9BZS4;Q6AHX7	Pre-mRNA-splicing regulator WTAP	WTAP	sp|Q15007|FL2D_HUMAN Pre-mRNA-splicing regulator WTAP OS=Homo sapiens OX=9606 GN=WTAP PE=1 SV=2;tr|A8K489|A8K489_HUMAN cDNA FLJ76151, highly similar to Homo sapiens Wilms tumor 1 associated protein (WTAP), transcript variant 1, mRNA OS=Homo sapiens OX=9606	Q15007	10440000	9940600	9027300	8386700	10217000	11541000	12378000	12368000	11334000	11333000	12200000	0			23.3156	23.2449	23.1059	22.9997	23.2845	23.4603	23.5613	23.5601	23.4341	23.434	23.5404	Q15007	0.323453		Q15007	0.299862	23.34	4.33601	9.94526e-05	0.00564529	1.18722	sp|Q15007|FL2D_HUMAN Pre-mRNA-splicing regulator WTAP OS=Homo sapiens OX=9606 GN=WTAP PE=1 SV=2;tr|A8K489|A8K489_HUMAN cDNA FLJ76151, highly similar to Homo sapiens Wilms tumor 1 associated protein (WTAP), transcript variant 1, mRNA OS=Homo sapiens OX=9606				Q15007	0.299862	23.34	0.532528
133	11859	Q6PI41;A0A024R0F0;Q9NWT8	Aurora kinase A-interacting protein	AURKAIP1	tr|Q6PI41|Q6PI41_HUMAN AURKAIP1 protein (Fragment) OS=Homo sapiens OX=9606 GN=AURKAIP1 PE=2 SV=1;tr|A0A024R0F0|A0A024R0F0_HUMAN Aurora kinase A interacting protein 1, isoform CRA_a OS=Homo sapiens OX=9606 GN=AURKAIP1 PE=4 SV=1;sp|Q9NWT8|AKIP_HUMAN Aurora k	Q6PI41	627380	758800	520830	469350	763540	700200	861250	757360	717610	762980	1101600	0			19.259	19.5334	18.9904	18.8403	19.5423	19.4174	19.7161	19.5306	19.4528	19.5413	20.0712	Q6PI41	0.375871		Q6PI41	0.298556	19.3824	3.23156	0.00250868	0.0342013	-1.82774	tr|Q6PI41|Q6PI41_HUMAN AURKAIP1 protein (Fragment) OS=Homo sapiens OX=9606 GN=AURKAIP1 PE=2 SV=1;tr|A0A024R0F0|A0A024R0F0_HUMAN Aurora kinase A interacting protein 1, isoform CRA_a OS=Homo sapiens OX=9606 GN=AURKAIP1 PE=4 SV=1;sp|Q9NWT8|AKIP_HUMAN Aurora k				Q6PI41	0.298556	19.3824	0.384484
5362	16675;32489;52391;57923	Q53EN2;Q8N668;Q53Q75;H7C377;Q53SJ8;H0Y7J4	COMM domain-containing protein 1	COMMD1;C2orf5	tr|Q53EN2|Q53EN2_HUMAN MURR1 variant (Fragment) OS=Homo sapiens OX=9606 PE=2 SV=1;sp|Q8N668|COMD1_HUMAN COMM domain-containing protein 1 OS=Homo sapiens OX=9606 GN=COMMD1 PE=1 SV=1;tr|Q53Q75|Q53Q75_HUMAN Uncharacterized protein C2orf5 (Fragment) OS=Homo sa	Q53EN2	1692300	1638600	1456200	1295000	1586000	1820300	1984300	1858100	1835800	1894000	1852600	0			20.6906	20.644	20.4738	20.3045	20.597	20.7957	20.9202	20.8254	20.808	20.853	20.8211	Q53EN2	0.312244		Q53EN2	0.298496	20.6912	4.23423	0.000135648	0.00688607	0.894436	tr|Q53EN2|Q53EN2_HUMAN MURR1 variant (Fragment) OS=Homo sapiens OX=9606 PE=2 SV=1;sp|Q8N668|COMD1_HUMAN COMM domain-containing protein 1 OS=Homo sapiens OX=9606 GN=COMMD1 PE=1 SV=1;tr|Q53Q75|Q53Q75_HUMAN Uncharacterized protein C2orf5 (Fragment) OS=Homo sa				Q53EN2	0.298496	20.6912	0.50303
6827	23295;23724	Q9ULX9;B0QY71;B0QY70	Transcription factor MafF	MAFF	sp|Q9ULX9|MAFF_HUMAN Transcription factor MafF OS=Homo sapiens OX=9606 GN=MAFF PE=1 SV=2;tr|B0QY71|B0QY71_HUMAN Transcription factor MafF (Fragment) OS=Homo sapiens OX=9606 GN=MAFF PE=1 SV=1;tr|B0QY70|B0QY70_HUMAN Transcription factor MafF (Fragment) OS=Ho	Q9ULX9	2252200	1959600	1976500	1913100	2107000	2361300	2688700	2514700	2520200	2451100	2477300	0			21.1029	20.9021	20.9145	20.8675	21.0068	21.1712	21.3585	21.262	21.2651	21.225	21.2403	Q9ULX9	0.309583		Q9ULX9	0.297582	21.1075	4.46336	6.72645e-05	0.00437499	1.55666	sp|Q9ULX9|MAFF_HUMAN Transcription factor MafF OS=Homo sapiens OX=9606 GN=MAFF PE=1 SV=2;tr|B0QY71|B0QY71_HUMAN Transcription factor MafF (Fragment) OS=Homo sapiens OX=9606 GN=MAFF PE=1 SV=1;tr|B0QY70|B0QY70_HUMAN Transcription factor MafF (Fragment) OS=Ho				Q9ULX9	0.297582	21.1075	0.518171
6791	9151;35619;36464	Q9UJX5;D6RAP6;D6RFM7;B3KN47	Anaphase-promoting complex subunit 4	ANAPC4	sp|Q9UJX5|APC4_HUMAN Anaphase-promoting complex subunit 4 OS=Homo sapiens OX=9606 GN=ANAPC4 PE=1 SV=2;tr|D6RAP6|D6RAP6_HUMAN Anaphase-promoting complex subunit 4 (Fragment) OS=Homo sapiens OX=9606 GN=ANAPC4 PE=1 SV=1	Q9UJX5	33739	34357	27883	29019	47004	42198	55747	35165	38600	38659	32006	0			15.0421	15.0683	14.7671	14.8247	15.5205	15.3649	15.7666	15.1019	15.2363	15.2385	14.966	Q9UJX5	0.416071		Q9UJX5	0.297084	15.1931	2.94458	0.00543443	0.046356	-2.5348	sp|Q9UJX5|APC4_HUMAN Anaphase-promoting complex subunit 4 OS=Homo sapiens OX=9606 GN=ANAPC4 PE=1 SV=2;tr|D6RAP6|D6RAP6_HUMAN Anaphase-promoting complex subunit 4 (Fragment) OS=Homo sapiens OX=9606 GN=ANAPC4 PE=1 SV=1				Q9UJX5	0.297084	15.1931	0.337487
3263	329;10947;11497;33605;34962;37071;49288;51051;58843;60535;63573	Q53YP0;B4E1N4;Q9NZM5;Q7L4X7;Q96CS0;B4DVK1;B4DND9;B4E013;M0QZ34;M0QX73;Q9H7J4;M0QZU5;M0QYZ9;Q9P0B0	Glioma tumor suppressor candidate region gene 2 protein	GLTSCR2	tr|Q53YP0|Q53YP0_HUMAN Ribosome biogenesis protein NOP53 OS=Homo sapiens OX=9606 PE=2 SV=1;tr|B4E1N4|B4E1N4_HUMAN cDNA FLJ61695, highly similar to Glioma tumor suppressor candidate region gene 2 protein OS=Homo sapiens OX=9606 PE=2 SV=1;sp|Q9NZM5|NOP53_HUM	Q53YP0	10549000	9126900	9138700	8508400	9400300	10546000	11719000	11953000	11558000	11538000	10037000	0			23.3306	23.1217	23.1236	23.0205	23.1643	23.3302	23.4824	23.5109	23.4624	23.4599	23.2588	Q53YP0	0.30006		Q53YP0	0.29702	23.3006	4.3792	8.71293e-05	0.00524744	1.31213	tr|Q53YP0|Q53YP0_HUMAN Ribosome biogenesis protein NOP53 OS=Homo sapiens OX=9606 PE=2 SV=1;tr|B4E1N4|B4E1N4_HUMAN cDNA FLJ61695, highly similar to Glioma tumor suppressor candidate region gene 2 protein OS=Homo sapiens OX=9606 PE=2 SV=1;sp|Q9NZM5|NOP53_HUM				Q53YP0	0.29702	23.3006	0.501077
859	3947;10512;11088;25136;35675;60934	A0A024R9T3;Q8N442	Translation factor GUF1, mitochondrial	GUF1	tr|A0A024R9T3|A0A024R9T3_HUMAN Translation factor GUF1, mitochondrial OS=Homo sapiens OX=9606 GN=GUF1 PE=3 SV=1;sp|Q8N442|GUF1_HUMAN Translation factor GUF1, mitochondrial OS=Homo sapiens OX=9606 GN=GUF1 PE=1 SV=1	A0A024R9T3	1212500	1244800	1055800	943250	1252700	1311700	1519000	1291900	1254500	1630100	1190700	0			20.2096	20.2475	20.0099	19.8473	20.2566	20.323	20.5347	20.3011	20.2587	20.6365	20.1834	A0A024R9T3	0.332241		A0A024R9T3	0.29663	20.2625	3.72873	0.000612192	0.0155262	-0.519798	tr|A0A024R9T3|A0A024R9T3_HUMAN Translation factor GUF1, mitochondrial OS=Homo sapiens OX=9606 GN=GUF1 PE=3 SV=1;sp|Q8N442|GUF1_HUMAN Translation factor GUF1, mitochondrial OS=Homo sapiens OX=9606 GN=GUF1 PE=1 SV=1				A0A024R9T3	0.29663	20.2625	0.422306
6749	66068	S4R2Z4;Q9UBK9	Protein UXT	UXT	tr|S4R2Z4|S4R2Z4_HUMAN Protein UXT OS=Homo sapiens OX=9606 GN=UXT PE=1 SV=1;sp|Q9UBK9|UXT_HUMAN Protein UXT OS=Homo sapiens OX=9606 GN=UXT PE=1 SV=1	S4R2Z4	489580	442220	452060	385430	441550	504490	613210	513460	554580	528290	479110	0			18.9012	18.7544	18.7861	18.5561	18.7522	18.9445	19.226	18.9699	19.081	19.011	18.87	S4R2Z4	0.297016		S4R2Z4	0.296464	18.8982	4.17783	0.000160961	0.00746474	0.733232	tr|S4R2Z4|S4R2Z4_HUMAN Protein UXT OS=Homo sapiens OX=9606 GN=UXT PE=1 SV=1;sp|Q9UBK9|UXT_HUMAN Protein UXT OS=Homo sapiens OX=9606 GN=UXT PE=1 SV=1				S4R2Z4	0.296464	18.8982	0.471096
2300	688;5743;12449;20382;20725;27087;27885;33725;54116;64743	A4D1Z4;O43299;A0A3B3IS81;A0A3B3ISJ0;A0A024R817		KIAA0415	tr|A4D1Z4|A4D1Z4_HUMAN KIAA0415 gene product OS=Homo sapiens OX=9606 GN=KIAA0415 PE=4 SV=1	A4D1Z4	245530	218470	219490	213430	254470	245710	321450	268720	259650	322970	262250	0			17.9055	17.7371	17.7438	17.7034	17.9571	17.9066	18.2942	18.0357	17.9862	18.301	18.0006	A4D1Z4	0.332311		A4D1Z4	0.295374	17.9571	3.88781	0.000383625	0.0123143	-0.0826733	tr|A4D1Z4|A4D1Z4_HUMAN KIAA0415 gene product OS=Homo sapiens OX=9606 GN=KIAA0415 PE=4 SV=1				A4D1Z4	0.295374	17.9571	0.425664
1910	7790;9072;19996;25980;52670	A0A1X7SBY3;H0Y860;A0A1W2PRA1;B3KUB5;Q9P246;H7C5C6;H7C5A5;R4GNC5;R4GN82;R4GMP0;H7C5K2	Stromal interaction molecule 2	STIM2	tr|A0A1X7SBY3|A0A1X7SBY3_HUMAN Stromal interaction molecule 2 OS=Homo sapiens OX=9606 GN=STIM2 PE=1 SV=1;tr|H0Y860|H0Y860_HUMAN Stromal interaction molecule 2 OS=Homo sapiens OX=9606 GN=STIM2 PE=1 SV=1;tr|A0A1W2PRA1|A0A1W2PRA1_HUMAN Stromal interaction mol	A0A1X7SBY3	200020	187170	162490	165520	177100	202060	213350	212750	248720	217370	212130	0			17.6098	17.514	17.31	17.3366	17.4342	17.6244	17.7029	17.6988	17.9242	17.7298	17.6946	A0A1X7SBY3	0.293401		A0A1X7SBY3	0.295082	17.5885	4.16028	0.000169738	0.0075703	0.683235	tr|A0A1X7SBY3|A0A1X7SBY3_HUMAN Stromal interaction molecule 2 OS=Homo sapiens OX=9606 GN=STIM2 PE=1 SV=1;tr|H0Y860|H0Y860_HUMAN Stromal interaction molecule 2 OS=Homo sapiens OX=9606 GN=STIM2 PE=1 SV=1;tr|A0A1W2PRA1|A0A1W2PRA1_HUMAN Stromal interaction mol				A0A1X7SBY3	0.295082	17.5885	0.45183
1227	22379;37175;67228	B3KPU0;A0A087WVI1;Q96JY6;E5RGS7;H0YBP7;A0A087WUQ1;C9JS55;H7C1D1	PDZ and LIM domain protein 2	PDLIM2	tr|B3KPU0|B3KPU0_HUMAN PDZ and LIM domain protein 2 OS=Homo sapiens OX=9606 GN=PDLIM2 PE=1 SV=1;tr|A0A087WVI1|A0A087WVI1_HUMAN PDZ and LIM domain protein 2 OS=Homo sapiens OX=9606 GN=PDLIM2 PE=1 SV=1;sp|Q96JY6|PDLI2_HUMAN PDZ and LIM domain protein 2 OS=Ho	B3KPU0	509400	442440	474980	479850	530760	557900	586660	532980	817010	531470	530930	0			18.9584	18.7551	18.8575	18.8722	19.0177	19.0896	19.1622	19.0237	19.64	19.0196	19.0182	B3KPU0	0.326207		B3KPU0	0.294832	19.0396	3.5065	0.00116166	0.0222498	-1.11615	tr|B3KPU0|B3KPU0_HUMAN PDZ and LIM domain protein 2 OS=Homo sapiens OX=9606 GN=PDLIM2 PE=1 SV=1;tr|A0A087WVI1|A0A087WVI1_HUMAN PDZ and LIM domain protein 2 OS=Homo sapiens OX=9606 GN=PDLIM2 PE=1 SV=1;sp|Q96JY6|PDLI2_HUMAN PDZ and LIM domain protein 2 OS=Ho				B3KPU0	0.294832	19.0396	0.378175
4690	1069;14817;16832;17595;26086;30347;39696;42357;42802;51670;57177	Q8TAS0;P36542	ATP synthase subunit gamma;ATP synthase subunit gamma, mitochondrial	ATP5C1	tr|Q8TAS0|Q8TAS0_HUMAN ATP synthase subunit gamma (Fragment) OS=Homo sapiens OX=9606 PE=2 SV=1;sp|P36542|ATPG_HUMAN ATP synthase subunit gamma, mitochondrial OS=Homo sapiens OX=9606 GN=ATP5F1C PE=1 SV=1	Q8TAS0	45081	38449	43138	35352	43012	38460	58137	44106	57603	55585	32921	0			15.4602	15.2307	15.3967	15.1095	15.3925	15.2311	15.8272	15.4287	15.8139	15.7624	15.0067	Q8TAS0	0.313375		Q8TAS0	0.294738	15.4653	3.3596	0.00175863	0.0281824	-1.50022	tr|Q8TAS0|Q8TAS0_HUMAN ATP synthase subunit gamma (Fragment) OS=Homo sapiens OX=9606 PE=2 SV=1;sp|P36542|ATPG_HUMAN ATP synthase subunit gamma, mitochondrial OS=Homo sapiens OX=9606 GN=ATP5F1C PE=1 SV=1				Q8TAS0	0.294738	15.4653	0.361376
4785	1390;3660;5031;5032;5256;6242;6666;6992;8562;11063;11472;13756;20822;22441;23027;23397;23398;24533;26182;28618;29395;29778;30020;30497;30766;31591;40317;40816;41040;41370;41513;42294;44926;45404;46515;47043;49690;52422;55415;56191;57425;60409;61294;61334;62816	P49588;H3BPK7	Alanine--tRNA ligase, cytoplasmic	AARS	sp|P49588|SYAC_HUMAN Alanine--tRNA ligase, cytoplasmic OS=Homo sapiens OX=9606 GN=AARS PE=1 SV=2	P49588	128920000	112410000	109180000	101860000	117750000	130470000	145530000	143980000	142100000	135640000	118870000	0			26.9419	26.7442	26.7021	26.602	26.8112	26.9591	27.1167	27.1013	27.0823	27.0152	26.8248	P49588	0.307382		P49588	0.294664	26.9076	4.29058	0.000114262	0.00625833	1.05623	sp|P49588|SYAC_HUMAN Alanine--tRNA ligase, cytoplasmic OS=Homo sapiens OX=9606 GN=AARS PE=1 SV=2				P49588	0.294664	26.9076	0.460556
1876	14792;15043;16860;26787;43908	Q53HH3;A0A1U9X7S4;Q92759;A0A0G2JHJ2	General transcription factor IIH subunit 4	GTF2H4	tr|Q53HH3|Q53HH3_HUMAN General transcription factor IIH subunit 4 (Fragment) OS=Homo sapiens OX=9606 PE=2 SV=1;tr|A0A1U9X7S4|A0A1U9X7S4_HUMAN General transcription factor IIH subunit 4 OS=Homo sapiens OX=9606 PE=3 SV=1;sp|Q92759|TF2H4_HUMAN General transcr	Q53HH3	2207000	2100000	1806000	1650300	2145800	2199800	2438400	2412500	2374000	2676400	2317900	0			21.0737	21.002	20.7844	20.6543	21.0331	21.0689	21.2175	21.2021	21.1789	21.3519	21.1444	Q53HH3	0.325286		Q53HH3	0.294384	21.0567	3.91646	0.000352405	0.0118172	-0.00312522	tr|Q53HH3|Q53HH3_HUMAN General transcription factor IIH subunit 4 (Fragment) OS=Homo sapiens OX=9606 PE=2 SV=1;tr|A0A1U9X7S4|A0A1U9X7S4_HUMAN General transcription factor IIH subunit 4 OS=Homo sapiens OX=9606 PE=3 SV=1;sp|Q92759|TF2H4_HUMAN General transcr				Q53HH3	0.294384	21.0567	0.417072
2079	2704;7637;7683;8007;8021;10767;13201;13936;17152;17518;24138;25241;28097;34530;35679;49213;49793;51646;55755;57739;58177;59490;60707;62632;66946;67487	A0A384MTT2;Q16822;A0A0S2Z430;Q6IB91;H0YML5;H0YM31;A0A0S2Z451;A0A0A0MS74;A0A0S2Z4C0;H0YMA5;H0YNG4;P35558;H0YMU6;B4E1E8	Phosphoenolpyruvate carboxykinase [GTP], mitochondrial	PCK2	tr|A0A384MTT2|A0A384MTT2_HUMAN Epididymis secretory sperm binding protein OS=Homo sapiens OX=9606 GN=PCK2 PE=2 SV=1;sp|Q16822|PCKGM_HUMAN Phosphoenolpyruvate carboxykinase [GTP], mitochondrial OS=Homo sapiens OX=9606 GN=PCK2 PE=1 SV=4;tr|A0A0S2Z430|A0A0S2Z	A0A384MTT2	17466000	16213000	14946000	13636000	16230000	17976000	19971000	19728000	19375000	18921000	17792000	0			24.0581	23.9506	23.8333	23.7009	23.9522	24.0996	24.2514	24.2337	24.2077	24.1735	24.0847	A0A384MTT2	0.307456		A0A384MTT2	0.294168	24.0461	4.25099	0.000128906	0.00677272	0.942495	tr|A0A384MTT2|A0A384MTT2_HUMAN Epididymis secretory sperm binding protein OS=Homo sapiens OX=9606 GN=PCK2 PE=2 SV=1;sp|Q16822|PCKGM_HUMAN Phosphoenolpyruvate carboxykinase [GTP], mitochondrial OS=Homo sapiens OX=9606 GN=PCK2 PE=1 SV=4;tr|A0A0S2Z430|A0A0S2Z				A0A384MTT2	0.294168	24.0461	0.449909
2988	33362	H0YDK3;Q659C2;H0YDE3;H0YDU2;E9PRI1;Q53ES5;B3KX63;Q96NY9	Crossover junction endonuclease MUS81	MUS81;DKFZp761P1714	tr|H0YDK3|H0YDK3_HUMAN Crossover junction endonuclease MUS81 (Fragment) OS=Homo sapiens OX=9606 GN=MUS81 PE=1 SV=1;tr|Q659C2|Q659C2_HUMAN Uncharacterized protein DKFZp761P1714 (Fragment) OS=Homo sapiens OX=9606 GN=DKFZp761P1714 PE=2 SV=1;tr|H0YDE3|H0YDE3_H	H0YDK3	201430	201260	165580	149990	192440	197550	293220	194850	188030	252970	194740	0			17.6199	17.6187	17.3372	17.1945	17.5541	17.5919	18.1616	17.572	17.5206	17.9486	17.5712	H0YDK3	0.316363		H0YDK3	0.294068	17.6119	3.16423	0.00301644	0.0371492	-1.99708	tr|H0YDK3|H0YDK3_HUMAN Crossover junction endonuclease MUS81 (Fragment) OS=Homo sapiens OX=9606 GN=MUS81 PE=1 SV=1;tr|Q659C2|Q659C2_HUMAN Uncharacterized protein DKFZp761P1714 (Fragment) OS=Homo sapiens OX=9606 GN=DKFZp761P1714 PE=2 SV=1;tr|H0YDE3|H0YDE3_H				H0YDK3	0.294068	17.6119	0.333927
5582	10638;12822;15277;23329;34198;36706;51844;58115;59496;63099;64702	Q69YN4;H0YBN5;H0YB68	Protein virilizer homolog	KIAA1429	sp|Q69YN4|VIR_HUMAN Protein virilizer homolog OS=Homo sapiens OX=9606 GN=VIRMA PE=1 SV=2	Q69YN4	4925100	5044200	4123800	3751800	5090700	5475700	5964800	5492100	5546400	5449300	5554600	0			22.2317	22.2662	21.9755	21.8392	22.2794	22.3846	22.508	22.3889	22.4031	22.3776	22.4052	Q69YN4	0.334318		Q69YN4	0.294062	22.2654	3.91826	0.000350522	0.0118172	0.00189782	sp|Q69YN4|VIR_HUMAN Protein virilizer homolog OS=Homo sapiens OX=9606 GN=VIRMA PE=1 SV=2				Q69YN4	0.294062	22.2654	0.413431
848	2594;27587;36123;43819;62214	Q96JC1;A0A024R9L9;B3KY10	Vam6/Vps39-like protein	VPS39	sp|Q96JC1|VPS39_HUMAN Vam6/Vps39-like protein OS=Homo sapiens OX=9606 GN=VPS39 PE=1 SV=2;tr|A0A024R9L9|A0A024R9L9_HUMAN Vacuolar protein sorting 39 (Yeast), isoform CRA_b OS=Homo sapiens OX=9606 GN=VPS39 PE=4 SV=1	Q96JC1	2993600	2972800	2476300	2484400	3153700	3343100	3743900	3430000	3281600	3395800	2766100	0			21.5134	21.5034	21.2398	21.2445	21.5886	21.6728	21.8361	21.7098	21.646	21.6953	21.3994	Q96JC1	0.336721		Q96JC1	0.294052	21.565	4.07677	0.000218329	0.00868311	0.446372	sp|Q96JC1|VPS39_HUMAN Vam6/Vps39-like protein OS=Homo sapiens OX=9606 GN=VPS39 PE=1 SV=2;tr|A0A024R9L9|A0A024R9L9_HUMAN Vacuolar protein sorting 39 (Yeast), isoform CRA_b OS=Homo sapiens OX=9606 GN=VPS39 PE=4 SV=1				Q96JC1	0.294052	21.565	0.430032
2948	2057;6133;6267;6788;10993;11230;12110;12298;12300;13912;18317;18344;22519;27874;34035;39417;43676;47281;47282;49969;52597;57277;61429;66841	P68363;B3KT06;A8JZY9;B3KPS3;B4DDU2;F8VVB9;B4DN58;F8VRZ4;F8VS66;F8VWV9;C9JDS9;F8VX09;Q6QMJ5;C9K0S6;F8VRK0;F8VXZ7;F8W0F6;D3DX41	Tubulin alpha-1B chain	TUBA1B	sp|P68363|TBA1B_HUMAN Tubulin alpha-1B chain OS=Homo sapiens OX=9606 GN=TUBA1B PE=1 SV=1;tr|B3KT06|B3KT06_HUMAN Tubulin alpha chain OS=Homo sapiens OX=9606 PE=2 SV=1;tr|A8JZY9|A8JZY9_HUMAN Tubulin alpha chain OS=Homo sapiens OX=9606 PE=2 SV=1;tr|B3KPS3|B3K	P68363	8775800	8702300	6550800	5504700	7421200	8089800	8536100	9165500	9329000	9586800	5744000	0			23.0651	23.053	22.6432	22.3922	22.8232	22.9477	23.0252	23.1278	23.1533	23.1926	22.4536	P68363	0.300917		P68363	0.29395	22.9423	3.36291	0.00174241	0.0281824	-1.49165	sp|P68363|TBA1B_HUMAN Tubulin alpha-1B chain OS=Homo sapiens OX=9606 GN=TUBA1B PE=1 SV=1;tr|B3KT06|B3KT06_HUMAN Tubulin alpha chain OS=Homo sapiens OX=9606 PE=2 SV=1;tr|A8JZY9|A8JZY9_HUMAN Tubulin alpha chain OS=Homo sapiens OX=9606 PE=2 SV=1;tr|B3KPS3|B3K				P68363	0.29395	22.9423	0.353687
3327	15300;39285	H7C2Z6;H7BXD5;B7Z322;P28676;C9JIZ3	Grancalcin	GCA	tr|H7C2Z6|H7C2Z6_HUMAN Grancalcin (Fragment) OS=Homo sapiens OX=9606 GN=GCA PE=1 SV=1;tr|H7BXD5|H7BXD5_HUMAN Grancalcin OS=Homo sapiens OX=9606 GN=GCA PE=1 SV=1;tr|B7Z322|B7Z322_HUMAN cDNA FLJ52146, highly similar to Grancalcin OS=Homo sapiens OX=9606 PE=2	H7C2Z6	490400	447430	425580	362580	443500	513660	552920	527630	524110	529190	465770	0			18.9036	18.7713	18.6991	18.4679	18.7586	18.9704	19.0767	19.0092	18.9995	19.0134	18.8293	H7C2Z6	0.303377		H7C2Z6	0.293756	18.867	4.16046	0.000169646	0.0075703	0.683746	tr|H7C2Z6|H7C2Z6_HUMAN Grancalcin (Fragment) OS=Homo sapiens OX=9606 GN=GCA PE=1 SV=1;tr|H7BXD5|H7BXD5_HUMAN Grancalcin OS=Homo sapiens OX=9606 GN=GCA PE=1 SV=1;tr|B7Z322|B7Z322_HUMAN cDNA FLJ52146, highly similar to Grancalcin OS=Homo sapiens OX=9606 PE=2				H7C2Z6	0.293756	18.867	0.435109
6105	390;391;13004;21394;22165;22173;22431;23860;25493;48506;52069;52088;54555;56223;57011	Q92804;B4E312;A0A075B7D9;A0A075B7F4;A0A075B7C1;A0A075B7F2;A0A075B7E4	TATA-binding protein-associated factor 2N	TAF15	sp|Q92804|RBP56_HUMAN TATA-binding protein-associated factor 2N OS=Homo sapiens OX=9606 GN=TAF15 PE=1 SV=1;tr|B4E312|B4E312_HUMAN cDNA FLJ53422, highly similar to TATA-binding protein-associated factor 2N OS=Homo sapiens OX=9606 PE=2 SV=1;tr|A0A075B7D9|A0A	Q92804	8615800	7670100	7492200	6996100	8441500	8997900	10276000	10102000	9784200	8851200	9147800	0			23.0386	22.8708	22.837	22.7381	23.0091	23.1012	23.2928	23.2681	23.222	23.0774	23.125	Q92804	0.321198		Q92804	0.293606	23.0455	4.19097	0.000154679	0.00746474	0.770726	sp|Q92804|RBP56_HUMAN TATA-binding protein-associated factor 2N OS=Homo sapiens OX=9606 GN=TAF15 PE=1 SV=1;tr|B4E312|B4E312_HUMAN cDNA FLJ53422, highly similar to TATA-binding protein-associated factor 2N OS=Homo sapiens OX=9606 PE=2 SV=1;tr|A0A075B7D9|A0A				Q92804	0.293606	23.0455	0.436383
2149	34682	A0A3B3IRS7;A0A3B3IU68;A0A3F2YP66;A0A3B3ITP2;A0A3B3IT31;Q9NUN5	Probable lysosomal cobalamin transporter	LMBRD1	tr|A0A3B3IRS7|A0A3B3IRS7_HUMAN Probable lysosomal cobalamin transporter OS=Homo sapiens OX=9606 GN=LMBRD1 PE=1 SV=1;tr|A0A3B3IU68|A0A3B3IU68_HUMAN Probable lysosomal cobalamin transporter (Fragment) OS=Homo sapiens OX=9606 GN=LMBRD1 PE=1 SV=1;tr|A0A3F2YP66	A0A3B3IRS7	754230	676780	526370	418440	630320	643340	672020	797500	749250	756520	478470	0			19.5246	19.3683	19.0057	18.6747	19.2657	19.2952	19.3581	19.6051	19.5151	19.529	18.8681	A0A3B3IRS7	0.317182		A0A3B3IRS7	0.292706	19.3142	3.05957	0.00400308	0.0415894	-2.25621	tr|A0A3B3IRS7|A0A3B3IRS7_HUMAN Probable lysosomal cobalamin transporter OS=Homo sapiens OX=9606 GN=LMBRD1 PE=1 SV=1;tr|A0A3B3IU68|A0A3B3IU68_HUMAN Probable lysosomal cobalamin transporter (Fragment) OS=Homo sapiens OX=9606 GN=LMBRD1 PE=1 SV=1;tr|A0A3F2YP66				A0A3B3IRS7	0.292706	19.3142	0.310148
5279	797;9559;10962;34402;40576;44194;46724;56940;60367	Q15814	Tubulin-specific chaperone C	TBCC	sp|Q15814|TBCC_HUMAN Tubulin-specific chaperone C OS=Homo sapiens OX=9606 GN=TBCC PE=1 SV=2	Q15814	4605300	4278400	3796400	3454200	4342400	4749700	5363500	4964000	4957600	4931900	4605600	0			22.1349	22.0286	21.8562	21.7199	22.0501	22.1794	22.3547	22.2431	22.2412	22.2337	22.135	Q15814	0.315523		Q15814	0.292492	22.1042	4.05856	0.000230608	0.00899946	0.394938	sp|Q15814|TBCC_HUMAN Tubulin-specific chaperone C OS=Homo sapiens OX=9606 GN=TBCC PE=1 SV=2				Q15814	0.292492	22.1042	0.408747
5151	1595;36552;37516;41917;44824;50645;58734;63569	Q13563;B4DE45;B4DFN3;A0A0C5GN91;B7Z2D4	Polycystin-2	PKD2	sp|Q13563|PKD2_HUMAN Polycystin-2 OS=Homo sapiens OX=9606 GN=PKD2 PE=1 SV=3	Q13563	1692900	1430300	1531000	1352700	1553100	1677700	1767500	1765600	1751900	2338200	1632100	0			20.6911	20.4479	20.546	20.3674	20.5667	20.678	20.7533	20.7517	20.7405	21.157	20.6383	Q13563	0.303004		Q13563	0.29228	20.67	3.76339	0.000553248	0.0145759	-0.425245	sp|Q13563|PKD2_HUMAN Polycystin-2 OS=Homo sapiens OX=9606 GN=PKD2 PE=1 SV=3				Q13563	0.29228	20.67	0.376565
1877	109	A0A1U9X7U3;A0A1U9X7U8;Q92506	Estradiol 17-beta-dehydrogenase 8	HSD17B8	tr|A0A1U9X7U3|A0A1U9X7U3_HUMAN HSD17B8 OS=Homo sapiens OX=9606 PE=4 SV=1;tr|A0A1U9X7U8|A0A1U9X7U8_HUMAN HSD17B8 OS=Homo sapiens OX=9606 PE=4 SV=1;sp|Q92506|DHB8_HUMAN Estradiol 17-beta-dehydrogenase 8 OS=Homo sapiens OX=9606 GN=HSD17B8 PE=1 SV=2	A0A1U9X7U3	286970	255580	253320	240540	295010	300630	346980	351450	326620	302950	257560	0			18.1305	17.9634	17.9506	17.8759	18.1704	18.1976	18.4045	18.423	18.3173	18.2087	17.9746	A0A1U9X7U3	0.33009		A0A1U9X7U3	0.292034	18.1642	4.13453	0.000183468	0.00790051	0.610014	tr|A0A1U9X7U3|A0A1U9X7U3_HUMAN HSD17B8 OS=Homo sapiens OX=9606 PE=4 SV=1;tr|A0A1U9X7U8|A0A1U9X7U8_HUMAN HSD17B8 OS=Homo sapiens OX=9606 PE=4 SV=1;sp|Q92506|DHB8_HUMAN Estradiol 17-beta-dehydrogenase 8 OS=Homo sapiens OX=9606 GN=HSD17B8 PE=1 SV=2				A0A1U9X7U3	0.292034	18.1642	0.410568
3819	948;38769;39081;50942	J3QRU4;F8WCA0;L7N2F9;P63027;K7ENK9;K7EKX0	Vesicle-associated membrane protein 2	VAMP2;VAMP3	tr|J3QRU4|J3QRU4_HUMAN Vesicle-associated membrane protein 2 OS=Homo sapiens OX=9606 GN=VAMP2 PE=4 SV=2;tr|F8WCA0|F8WCA0_HUMAN Vesicle-associated membrane protein 2 OS=Homo sapiens OX=9606 GN=VAMP2 PE=4 SV=1;tr|L7N2F9|L7N2F9_HUMAN Uncharacterized protein (	J3QRU4	192730	193030	173830	151540	198030	217440	227890	197110	230240	237340	198810	0			17.5562	17.5585	17.4073	17.2093	17.5954	17.7303	17.798	17.5886	17.8128	17.8566	17.601	J3QRU4	0.324415		J3QRU4	0.29191	17.6113	3.97872	0.000292826	0.0105081	0.170592	tr|J3QRU4|J3QRU4_HUMAN Vesicle-associated membrane protein 2 OS=Homo sapiens OX=9606 GN=VAMP2 PE=4 SV=2;tr|F8WCA0|F8WCA0_HUMAN Vesicle-associated membrane protein 2 OS=Homo sapiens OX=9606 GN=VAMP2 PE=4 SV=1;tr|L7N2F9|L7N2F9_HUMAN Uncharacterized protein (				J3QRU4	0.29191	17.6113	0.393573
3718	2053;4009;7729;8994;13163;14668;15641;15749;16970;24597;26720;28271;34378;36034;36519;37028;38180;38369;38681;41346;41837;42892;43899;44689;48380;53467;54864;57440;60618;60984;63181;64044;64387;65462	E9PLY5		MACF1	tr|E9PLY5|E9PLY5_HUMAN Microtubule-actin cross-linking factor 1, isoforms 1/2/3/5 (Fragment) OS=Homo sapiens OX=9606 GN=MACF1 PE=1 SV=1	E9PLY5	546910	484230	434120	392910	468070	537420	586250	569920	567140	570970	484610	0			19.0609	18.8853	18.7277	18.5838	18.8364	19.0357	19.1612	19.1204	19.1134	19.123	18.8865	E9PLY5	0.29627		E9PLY5	0.29189	18.9648	4.02179	0.000257471	0.00980275	0.291402	tr|E9PLY5|E9PLY5_HUMAN Microtubule-actin cross-linking factor 1, isoforms 1/2/3/5 (Fragment) OS=Homo sapiens OX=9606 GN=MACF1 PE=1 SV=1				E9PLY5	0.29189	18.9648	0.397585
5435	17529;23710;31847;35578;38972;43433;51529;54971;55808	Q59ES3;B4DE27	Amino acid transporter		tr|Q59ES3|Q59ES3_HUMAN Amino acid transporter (Fragment) OS=Homo sapiens OX=9606 PE=2 SV=1;tr|B4DE27|B4DE27_HUMAN Amino acid transporter OS=Homo sapiens OX=9606 PE=2 SV=1	Q59ES3	20405000	20279000	16988000	16057000	18684000	21578000	22888000	24039000	21732000	22421000	22045000	0			24.2824	24.2735	24.018	23.9367	24.1553	24.3631	24.4481	24.5189	24.3733	24.4184	24.394	Q59ES3	0.296685		Q59ES3	0.291156	24.2788	4.1137	0.000195367	0.00818627	0.550883	tr|Q59ES3|Q59ES3_HUMAN Amino acid transporter (Fragment) OS=Homo sapiens OX=9606 PE=2 SV=1;tr|B4DE27|B4DE27_HUMAN Amino acid transporter OS=Homo sapiens OX=9606 PE=2 SV=1				Q59ES3	0.291156	24.2788	0.397326
6767	14456;60153;60154	Q9UHA4;Q53FH6	Ragulator complex protein LAMTOR3	LAMTOR3	sp|Q9UHA4|LTOR3_HUMAN Ragulator complex protein LAMTOR3 OS=Homo sapiens OX=9606 GN=LAMTOR3 PE=1 SV=1;tr|Q53FH6|Q53FH6_HUMAN Mitogen-activated protein kinase kinase 1 interacting protein 1 variant (Fragment) OS=Homo sapiens OX=9606 PE=2 SV=1	Q9UHA4	1068800	1103500	890190	899620	957580	1155600	1262900	1229800	1138500	1214100	1146100	0			20.0276	20.0737	19.7638	19.779	19.869	20.1402	20.2683	20.23	20.1187	20.2115	20.1283	Q9UHA4	0.282751		Q9UHA4	0.291142	20.0482	4.17373	0.00016297	0.00746474	0.72155	sp|Q9UHA4|LTOR3_HUMAN Ragulator complex protein LAMTOR3 OS=Homo sapiens OX=9606 GN=LAMTOR3 PE=1 SV=1;tr|Q53FH6|Q53FH6_HUMAN Mitogen-activated protein kinase kinase 1 interacting protein 1 variant (Fragment) OS=Homo sapiens OX=9606 PE=2 SV=1				Q9UHA4	0.291142	20.0482	0.402943
3942	163;1579;2469;3642;12348;16893;25933;28785;29318;29319;32028;33731;40096;47234;49680;52405;53262;67337	H7BYY1;Q1ZYL5;F5H7S3;B7Z596;H0YN06;Q07413		TPM1	tr|H7BYY1|H7BYY1_HUMAN Tropomyosin 1 (Alpha), isoform CRA_m OS=Homo sapiens OX=9606 GN=TPM1 PE=1 SV=1;tr|Q1ZYL5|Q1ZYL5_HUMAN Tropomyosin 1 alpha variant 6 OS=Homo sapiens OX=9606 PE=2 SV=1;tr|F5H7S3|F5H7S3_HUMAN Tropomyosin alpha-1 chain OS=Homo sapiens OX	H7BYY1	7772800	6748600	6443900	6314100	7343600	8322500	9281000	7994700	8527200	8129700	6159500	0			22.89	22.6862	22.6195	22.5902	22.8081	22.9886	23.1458	22.9306	23.0236	22.9548	22.5544	H7BYY1	0.31224		H7BYY1	0.289918	22.8637	4.16968	0.00016498	0.00746474	0.710005	tr|H7BYY1|H7BYY1_HUMAN Tropomyosin 1 (Alpha), isoform CRA_m OS=Homo sapiens OX=9606 GN=TPM1 PE=1 SV=1;tr|Q1ZYL5|Q1ZYL5_HUMAN Tropomyosin 1 alpha variant 6 OS=Homo sapiens OX=9606 PE=2 SV=1;tr|F5H7S3|F5H7S3_HUMAN Tropomyosin alpha-1 chain OS=Homo sapiens OX				H7BYY1	0.289918	22.8637	0.386647
6355	38782	Q9BU64	Centromere protein O	CENPO	sp|Q9BU64|CENPO_HUMAN Centromere protein O OS=Homo sapiens OX=9606 GN=CENPO PE=1 SV=1	Q9BU64	34143	30091	26313	29798	35749	35211	45189	35247	36009	38909	35856	0			15.0593	14.877	14.6835	14.8629	15.1256	15.1037	15.4637	15.1052	15.1361	15.2478	15.1299	Q9BU64	0.340614		Q9BU64	0.289628	15.0665	3.70832	0.000649675	0.0159987	-0.575265	sp|Q9BU64|CENPO_HUMAN Centromere protein O OS=Homo sapiens OX=9606 GN=CENPO PE=1 SV=1				Q9BU64	0.289628	15.0665	0.340498
6013	2781;11928;23213;23628;48830;55187	X5D2R5;Q8TB37;F8W061;X5D995;X5DR74;B4DWB0;H0YHR7;F8W0A2;F8VP02;F8VZR8;B3KSK2	Iron-sulfur protein NUBPL	NUBPL	tr|X5D2R5|X5D2R5_HUMAN Nucleotide binding protein-like isoform A (Fragment) OS=Homo sapiens OX=9606 GN=NUBPL PE=2 SV=1;sp|Q8TB37|NUBPL_HUMAN Iron-sulfur protein NUBPL OS=Homo sapiens OX=9606 GN=NUBPL PE=1 SV=3;tr|F8W061|F8W061_HUMAN Iron-sulfur protein NUB	X5D2R5	1506900	1493600	1316800	1263500	1654700	1820100	1780200	1643500	1966900	1611800	1432300	0			20.5232	20.5104	20.3286	20.269	20.6581	20.7956	20.7636	20.6483	20.9075	20.6202	20.4499	X5D2R5	0.339276		X5D2R5	0.289204	20.6025	3.91502	0.000353912	0.0118172	-0.00712431	tr|X5D2R5|X5D2R5_HUMAN Nucleotide binding protein-like isoform A (Fragment) OS=Homo sapiens OX=9606 GN=NUBPL PE=2 SV=1;sp|Q8TB37|NUBPL_HUMAN Iron-sulfur protein NUBPL OS=Homo sapiens OX=9606 GN=NUBPL PE=1 SV=3;tr|F8W061|F8W061_HUMAN Iron-sulfur protein NUB				X5D2R5	0.289204	20.6025	0.354264
6370	5679	Q9BV73	Centrosome-associated protein CEP250	CEP250	sp|Q9BV73|CP250_HUMAN Centrosome-associated protein CEP250 OS=Homo sapiens OX=9606 GN=CEP250 PE=1 SV=2	Q9BV73	420130	580810	372230	324510	402190	399790	517980	581640	530380	505550	443880	0			18.6805	19.1477	18.5058	18.3079	18.6175	18.6089	18.9825	19.1498	19.0167	18.9475	18.7598	Q9BV73	0.28059		Q9BV73	0.289182	18.7965	2.96353	0.00516942	0.0454617	-2.48934	sp|Q9BV73|CP250_HUMAN Centrosome-associated protein CEP250 OS=Homo sapiens OX=9606 GN=CEP250 PE=1 SV=2				Q9BV73	0.289182	18.7965	0.26796
5763	6832;7741;10255;15807;20261;21365;28963;30030;32678;45326;53835;56542;57454;64539;65809;67629	Q7Z5G3;Q9NUB1;Q6ZV30;Q658X4;Q1RMZ4;Q5TF43;Q9H7Q4;Q658R1;Q8N2B9	Acetyl-coenzyme A synthetase;Acetyl-coenzyme A synthetase 2-like, mitochondrial	ACSS1;DKFZp666G0810	tr|Q7Z5G3|Q7Z5G3_HUMAN Acetyl-coenzyme A synthetase OS=Homo sapiens OX=9606 GN=ACSS1 PE=2 SV=1;sp|Q9NUB1|ACS2L_HUMAN Acetyl-coenzyme A synthetase 2-like, mitochondrial OS=Homo sapiens OX=9606 GN=ACSS1 PE=1 SV=2;tr|Q6ZV30|Q6ZV30_HUMAN Acetyl-coenzyme A synt	Q7Z5G3	2491800	2398700	2205300	2091900	2555200	2811600	3073500	2830400	2782200	2820100	2636500	0			21.2488	21.1938	21.0725	20.9964	21.285	21.423	21.5514	21.4326	21.4078	21.4273	21.3302	Q7Z5G3	0.320543		Q7Z5G3	0.289116	21.3039	4.252	0.000128511	0.00677272	0.945389	tr|Q7Z5G3|Q7Z5G3_HUMAN Acetyl-coenzyme A synthetase OS=Homo sapiens OX=9606 GN=ACSS1 PE=2 SV=1;sp|Q9NUB1|ACS2L_HUMAN Acetyl-coenzyme A synthetase 2-like, mitochondrial OS=Homo sapiens OX=9606 GN=ACSS1 PE=1 SV=2;tr|Q6ZV30|Q6ZV30_HUMAN Acetyl-coenzyme A synt				Q7Z5G3	0.289116	21.3039	0.38358
5813	21902	Q96BU7;Q86WA9	Sodium-independent sulfate anion transporter	SLC26A11	tr|Q96BU7|Q96BU7_HUMAN SLC26A11 protein (Fragment) OS=Homo sapiens OX=9606 GN=SLC26A11 PE=2 SV=1;sp|Q86WA9|S2611_HUMAN Sodium-independent sulfate anion transporter OS=Homo sapiens OX=9606 GN=SLC26A11 PE=2 SV=2	Q96BU7	264450	284090	199700	190950	270880	295820	343100	265180	279170	280640	241550	0			18.0126	18.116	17.6075	17.5428	18.0473	18.1744	18.3883	18.0166	18.0908	18.0984	17.882	Q96BU7	0.333938		Q96BU7	0.288428	18.0095	3.29218	0.00212193	0.0315486	-1.67354	tr|Q96BU7|Q96BU7_HUMAN SLC26A11 protein (Fragment) OS=Homo sapiens OX=9606 GN=SLC26A11 PE=2 SV=1;sp|Q86WA9|S2611_HUMAN Sodium-independent sulfate anion transporter OS=Homo sapiens OX=9606 GN=SLC26A11 PE=2 SV=2				Q96BU7	0.288428	18.0095	0.289848
5369	15265;16933;27507;31784;34638;36266;36267;37123;38147;52863	Q53F35;Q92688	Acidic leucine-rich nuclear phosphoprotein 32 family member B	ANP32B	tr|Q53F35|Q53F35_HUMAN Acidic (Leucine-rich) nuclear phosphoprotein 32 family, member B variant (Fragment) OS=Homo sapiens OX=9606 PE=2 SV=1;sp|Q92688|AN32B_HUMAN Acidic leucine-rich nuclear phosphoprotein 32 family member B OS=Homo sapiens OX=9606 GN=ANP3	Q53F35	25795000	23639000	22757000	20751000	23956000	26822000	28675000	29736000	27992000	29262000	27987000	0			24.6206	24.4947	24.4398	24.3067	24.5139	24.6769	24.7733	24.8257	24.7385	24.8025	24.7383	Q53F35	0.29795		Q53F35	0.288262	24.6193	4.26997	0.00012167	0.00654923	0.996967	tr|Q53F35|Q53F35_HUMAN Acidic (Leucine-rich) nuclear phosphoprotein 32 family, member B variant (Fragment) OS=Homo sapiens OX=9606 PE=2 SV=1;sp|Q92688|AN32B_HUMAN Acidic leucine-rich nuclear phosphoprotein 32 family member B OS=Homo sapiens OX=9606 GN=ANP3				Q53F35	0.288262	24.6193	0.373691
2953	65309	B3KTH8;P20265	POU domain protein;POU domain, class 3, transcription factor 2	POU3F2	tr|B3KTH8|B3KTH8_HUMAN POU domain protein OS=Homo sapiens OX=9606 PE=2 SV=1;sp|P20265|PO3F2_HUMAN POU domain, class 3, transcription factor 2 OS=Homo sapiens OX=9606 GN=POU3F2 PE=1 SV=4	B3KTH8	445170	437070	396070	339470	446560	475280	495490	473160	474050	600360	421150	0			18.764	18.7375	18.5954	18.3729	18.7685	18.8584	18.9185	18.852	18.8547	19.1955	18.684	B3KTH8	0.318353		B3KTH8	0.288146	18.7917	3.73524	0.000600677	0.0153714	-0.50207	tr|B3KTH8|B3KTH8_HUMAN POU domain protein OS=Homo sapiens OX=9606 PE=2 SV=1;sp|P20265|PO3F2_HUMAN POU domain, class 3, transcription factor 2 OS=Homo sapiens OX=9606 GN=POU3F2 PE=1 SV=4				B3KTH8	0.288146	18.7917	0.325522
6051	27569;34993;43474	Q8WUJ3	Cell migration-inducing and hyaluronan-binding protein	CEMIP	sp|Q8WUJ3|CEMIP_HUMAN Cell migration-inducing and hyaluronan-binding protein OS=Homo sapiens OX=9606 GN=CEMIP PE=1 SV=2	Q8WUJ3	1738700	1423900	1361100	1249000	1259200	1520700	1662000	1781200	1773600	1785800	1748100	0			20.7296	20.4414	20.3763	20.2523	20.2641	20.5363	20.6645	20.7644	20.7583	20.7681	20.7374	Q8WUJ3	0.2484		Q8WUJ3	0.285568	20.5555	3.73801	0.000595832	0.0153658	-0.494507	sp|Q8WUJ3|CEMIP_HUMAN Cell migration-inducing and hyaluronan-binding protein OS=Homo sapiens OX=9606 GN=CEMIP PE=1 SV=2				Q8WUJ3	0.285568	20.5555	0.294959
4831	445;29225;32024;39533;40018;45177	P52815;Q96Q74;Q15693	39S ribosomal protein L12, mitochondrial	MRPL12;MRPL7/L12	sp|P52815|RM12_HUMAN 39S ribosomal protein L12, mitochondrial OS=Homo sapiens OX=9606 GN=MRPL12 PE=1 SV=2;tr|Q96Q74|Q96Q74_HUMAN Mitochondrial ribosomal protein L7/L12 (Fragment) OS=Homo sapiens OX=9606 GN=MRPL7/L12 PE=4 SV=1	P52815	405840	390380	354470	376610	418900	449900	481500	483050	472920	481050	710330	0			18.6305	18.5745	18.4353	18.5227	18.6762	18.7793	18.8772	18.8818	18.8512	18.8758	19.4381	P52815	0.312292		P52815	0.285196	18.7105	4.34159	9.77719e-05	0.00560081	1.20331	sp|P52815|RM12_HUMAN 39S ribosomal protein L12, mitochondrial OS=Homo sapiens OX=9606 GN=MRPL12 PE=1 SV=2;tr|Q96Q74|Q96Q74_HUMAN Mitochondrial ribosomal protein L7/L12 (Fragment) OS=Homo sapiens OX=9606 GN=MRPL7/L12 PE=4 SV=1				P52815	0.285196	18.7105	0.33737
2592	6404;24383;28445;53170;57931	A8KAH1;P48651;Q9BSY0;J3KNR6	Phosphatidylserine synthase 1	PTDSS1	tr|A8KAH1|A8KAH1_HUMAN cDNA FLJ75839, highly similar to Homo sapiens phosphatidylserine synthase 1 (PTDSS1), mRNA OS=Homo sapiens OX=9606 PE=2 SV=1;sp|P48651|PTSS1_HUMAN Phosphatidylserine synthase 1 OS=Homo sapiens OX=9606 GN=PTDSS1 PE=1 SV=1;tr|Q9BSY0|Q9	A8KAH1	667260	619840	502150	478700	607090	659220	764470	664710	684980	706630	628340	0			19.3479	19.2415	18.9378	18.8688	19.2115	19.3304	19.5441	19.3424	19.3857	19.4306	19.2612	A8KAH1	0.307647		A8KAH1	0.285134	19.2641	3.69773	0.000669997	0.0163416	-0.604003	tr|A8KAH1|A8KAH1_HUMAN cDNA FLJ75839, highly similar to Homo sapiens phosphatidylserine synthase 1 (PTDSS1), mRNA OS=Homo sapiens OX=9606 PE=2 SV=1;sp|P48651|PTSS1_HUMAN Phosphatidylserine synthase 1 OS=Homo sapiens OX=9606 GN=PTDSS1 PE=1 SV=1;tr|Q9BSY0|Q9				A8KAH1	0.285134	19.2641	0.286597
2800	1418;3169;9873;12465;23339;23340;26589;38120;42429;42666;44852;45429;47299;47633;52376	B2RCD8;Q8IU81	Interferon regulatory factor 2-binding protein 1	IRF2BP1	tr|B2RCD8|B2RCD8_HUMAN cDNA, FLJ96012, highly similar to Homo sapiens interferon regulatory factor 2 binding protein 1 (IRF2BP1), mRNA OS=Homo sapiens OX=9606 PE=2 SV=1;sp|Q8IU81|I2BP1_HUMAN Interferon regulatory factor 2-binding protein 1 OS=Homo sapiens	B2RCD8	11374000	11611000	10065000	9282500	12123000	12332000	14370000	13766000	13298000	12383000	12650000	0			23.4392	23.469	23.2628	23.1461	23.5312	23.5559	23.7766	23.7146	23.6647	23.5619	23.5926	B2RCD8	0.32544		B2RCD8	0.28505	23.5122	3.91289	0.000356149	0.0118287	-0.0130307	tr|B2RCD8|B2RCD8_HUMAN cDNA, FLJ96012, highly similar to Homo sapiens interferon regulatory factor 2 binding protein 1 (IRF2BP1), mRNA OS=Homo sapiens OX=9606 PE=2 SV=1;sp|Q8IU81|I2BP1_HUMAN Interferon regulatory factor 2-binding protein 1 OS=Homo sapiens				B2RCD8	0.28505	23.5122	0.302209
1275	21925;58720	Q8TCT7;A0A087WZ50;A0A087WZ93	Signal peptide peptidase-like 2B	SPPL2B	sp|Q8TCT7|SPP2B_HUMAN Signal peptide peptidase-like 2B OS=Homo sapiens OX=9606 GN=SPPL2B PE=1 SV=2;tr|A0A087WZ50|A0A087WZ50_HUMAN Signal peptide peptidase-like 2B OS=Homo sapiens OX=9606 GN=SPPL2B PE=1 SV=1;tr|A0A087WZ93|A0A087WZ93_HUMAN Signal peptide pep	Q8TCT7	98775	85936	86293	87073	95655	98912	116470	116210	108100	112810	94708	0			16.5919	16.391	16.397	16.4099	16.5455	16.5939	16.8296	16.8264	16.722	16.7835	16.5312	Q8TCT7	0.303641		Q8TCT7	0.284018	16.6091	4.1702	0.00016472	0.00746474	0.711488	sp|Q8TCT7|SPP2B_HUMAN Signal peptide peptidase-like 2B OS=Homo sapiens OX=9606 GN=SPPL2B PE=1 SV=2;tr|A0A087WZ50|A0A087WZ50_HUMAN Signal peptide peptidase-like 2B OS=Homo sapiens OX=9606 GN=SPPL2B PE=1 SV=1;tr|A0A087WZ93|A0A087WZ93_HUMAN Signal peptide pep				Q8TCT7	0.284018	16.6091	0.308099
4432	40378;45788;46769;51710;55724;61991	Q5U091;P01111;P78460;Q96T27;Q7KZ06;Q71SP6;A0A221ZRZ1;G3V4K2;G3V5T7	GTPase NRas	NRAS	tr|Q5U091|Q5U091_HUMAN Neuroblastoma RAS viral (V-ras) oncogene homolog OS=Homo sapiens OX=9606 GN=NRAS PE=2 SV=1;sp|P01111|RASN_HUMAN GTPase NRas OS=Homo sapiens OX=9606 GN=NRAS PE=1 SV=1	Q5U091	1281900	1253400	1299600	1211500	1522400	1750200	1805800	1463900	1539900	1446000	1477800	0			20.2899	20.2574	20.3096	20.2084	20.5379	20.7391	20.7842	20.4814	20.5544	20.4636	20.495	Q5U091	0.338231		Q5U091	0.28391	20.4626	3.84663	0.000433243	0.0127003	-0.196577	tr|Q5U091|Q5U091_HUMAN Neuroblastoma RAS viral (V-ras) oncogene homolog OS=Homo sapiens OX=9606 GN=NRAS PE=2 SV=1;sp|P01111|RASN_HUMAN GTPase NRas OS=Homo sapiens OX=9606 GN=NRAS PE=1 SV=1				Q5U091	0.28391	20.4626	0.282839
3780	5495;36141	R9TJD7;F6R0L0;Q8NDZ2;B4DRM7	SUMO-interacting motif-containing protein 1	SIMC1	tr|R9TJD7|R9TJD7_HUMAN SIMC1 OS=Homo sapiens OX=9606 GN=SIMC1 PE=2 SV=1;tr|F6R0L0|F6R0L0_HUMAN SUMO-interacting motif-containing protein 1 OS=Homo sapiens OX=9606 GN=SIMC1 PE=1 SV=1;sp|Q8NDZ2|SIMC1_HUMAN SUMO-interacting motif-containing protein 1 OS=Homo	R9TJD7	144540	116600	92003	108780	102740	115040	134610	154390	152430	127000	68070	0			17.1411	16.8312	16.4894	16.731	16.6486	16.8118	17.0384	17.2362	17.2178	16.9545	16.0547	R9TJD7	0.253548		R9TJD7	0.283458	16.91	3.24443	0.00242133	0.0336721	-1.79513	tr|R9TJD7|R9TJD7_HUMAN SIMC1 OS=Homo sapiens OX=9606 GN=SIMC1 PE=2 SV=1;tr|F6R0L0|F6R0L0_HUMAN SUMO-interacting motif-containing protein 1 OS=Homo sapiens OX=9606 GN=SIMC1 PE=1 SV=1;sp|Q8NDZ2|SIMC1_HUMAN SUMO-interacting motif-containing protein 1 OS=Homo				R9TJD7	0.283458	16.91	0.233766
2441	270;1084;1795;1796;3301;18625;20284;21961;23018;25132;25896;29924;31229;34499;34662;35203;36092;44167;44246;45298;47160;47910;48063;48995;49532;49787;52530;57846;58941;59271;65230;66393	P56192;A8K492;B4DF61;B4E0E9;A0A024RBA2;H0YHV5;H0YIP0;F5H2V6;F8VS26;F8W0M7;F8W0S4;F8VZZ9;H0YI94;H0YIC2;Q8NAB3;F8VPL7;H0YHL6;H0YI27	Methionine--tRNA ligase, cytoplasmic	MARS	sp|P56192|SYMC_HUMAN Methionine--tRNA ligase, cytoplasmic OS=Homo sapiens OX=9606 GN=MARS PE=1 SV=2;tr|A8K492|A8K492_HUMAN cDNA FLJ76789, highly similar to Homo sapiens methionine-tRNA synthetase (MARS), mRNA OS=Homo sapiens OX=9606 PE=2 SV=1;tr|B4DF61|B4D	P56192	43219000	40211000	37149000	34878000	41478000	45798000	50405000	48226000	47832000	46635000	43915000	0			25.3652	25.2611	25.1468	25.0558	25.3058	25.4488	25.5871	25.5233	25.5115	25.4749	25.3882	P56192	0.301886		P56192	0.282162	25.368	4.14689	0.000176746	0.00777184	0.645146	sp|P56192|SYMC_HUMAN Methionine--tRNA ligase, cytoplasmic OS=Homo sapiens OX=9606 GN=MARS PE=1 SV=2;tr|A8K492|A8K492_HUMAN cDNA FLJ76789, highly similar to Homo sapiens methionine-tRNA synthetase (MARS), mRNA OS=Homo sapiens OX=9606 PE=2 SV=1;tr|B4DF61|B4D				P56192	0.282162	25.368	0.281116
2855	30484	B4DF21;Q6N083;Q6GMQ3;J3KQH6;B2RXH1;Q59GP6;P78364	Polyhomeotic-like protein 1	DKFZp686A1782;PHC1	tr|B4DF21|B4DF21_HUMAN cDNA FLJ60101, highly similar to Polyhomeotic-like protein 1 OS=Homo sapiens OX=9606 PE=2 SV=1;tr|Q6N083|Q6N083_HUMAN Uncharacterized protein DKFZp686A1782 OS=Homo sapiens OX=9606 GN=DKFZp686A1782 PE=2 SV=1;tr|Q6GMQ3|Q6GMQ3_HUMAN PHC	B4DF21	1314700	1206600	1092100	1030200	1267100	1318400	1456600	1442700	1448700	1492400	1080100	0			20.3263	20.2025	20.0587	19.9745	20.2731	20.3304	20.4742	20.4603	20.4663	20.5092	20.0427	B4DF21	0.307585		B4DF21	0.281064	20.3075	3.99066	0.000282576	0.0102582	0.204035	tr|B4DF21|B4DF21_HUMAN cDNA FLJ60101, highly similar to Polyhomeotic-like protein 1 OS=Homo sapiens OX=9606 PE=2 SV=1;tr|Q6N083|Q6N083_HUMAN Uncharacterized protein DKFZp686A1782 OS=Homo sapiens OX=9606 GN=DKFZp686A1782 PE=2 SV=1;tr|Q6GMQ3|Q6GMQ3_HUMAN PHC				B4DF21	0.281064	20.3075	0.255992
7070	4649;6805;8078;8080;18381;25503;42617;55664;65007;66130	X2L7S8;Q29945;Q29947;B3VN05;A0A128DYT3;Q5QR42;G9HZ41;G0Z2K6;A0A1L5IUQ9		HLA-A	tr|X2L7S8|X2L7S8_HUMAN MHC class I antigen (Fragment) OS=Homo sapiens OX=9606 GN=HLA-A PE=3 SV=1;tr|Q29945|Q29945_HUMAN MHC class I HLA-A cell surface antigen (Fragment) OS=Homo sapiens OX=9606 PE=2 SV=1	X2L7S8	1718900	1706600	1358000	1357900	1829900	1901500	2073000	1980200	1896200	1768400	1875300	0			20.713	20.7027	20.373	20.3729	20.8033	20.8587	20.9833	20.9172	20.8547	20.754	20.8387	X2L7S8	0.333147		X2L7S8	0.280568	20.7333	3.65424	0.000760089	0.0173211	-0.721636	tr|X2L7S8|X2L7S8_HUMAN MHC class I antigen (Fragment) OS=Homo sapiens OX=9606 GN=HLA-A PE=3 SV=1;tr|Q29945|Q29945_HUMAN MHC class I HLA-A cell surface antigen (Fragment) OS=Homo sapiens OX=9606 PE=2 SV=1				X2L7S8	0.280568	20.7333	0.228365
6968	1034	R4GN18		CD46	tr|R4GN18|R4GN18_HUMAN Membrane cofactor protein (Fragment) OS=Homo sapiens OX=9606 GN=CD46 PE=1 SV=1	R4GN18	1576500	1574900	1323300	1223400	1491400	1641500	1721000	1839800	1709400	1783900	1495600	0			20.5883	20.5868	20.3357	20.2225	20.5082	20.6466	20.7148	20.8111	20.7051	20.7666	20.5123	R4GN18	0.295511		R4GN18	0.280528	20.5886	3.91727	0.000351559	0.0118172	-0.000872944	tr|R4GN18|R4GN18_HUMAN Membrane cofactor protein (Fragment) OS=Homo sapiens OX=9606 GN=CD46 PE=1 SV=1				R4GN18	0.280528	20.5886	0.244279
653	9681;10160;10489;12688;21319;36416;37597;48485;51353;53315;57774;59649	B4DRY5;A0A024R7F7;Q4LE60;O14787;A0A075B780;Q05D48;B3KPC8;K7ENW1;K7ESC1;K7EMA3;K7ESG1	Transportin-2	TNPO2;TNPO2 variant protein	tr|B4DRY5|B4DRY5_HUMAN cDNA FLJ54538, highly similar to Transportin-2 OS=Homo sapiens OX=9606 PE=2 SV=1;tr|A0A024R7F7|A0A024R7F7_HUMAN Transportin 2 (Importin 3, karyopherin beta 2b), isoform CRA_b OS=Homo sapiens OX=9606 GN=TNPO2 PE=4 SV=1;tr|Q4LE60|Q4LE6	B4DRY5	1662800	1604400	1295000	1202500	1712100	1767400	1911100	1796200	1747500	1773500	2042900	0			20.6652	20.6136	20.3045	20.1976	20.7073	20.7532	20.866	20.7765	20.7369	20.7582	20.9622	B4DRY5	0.332917		B4DRY5	0.280494	20.6379	3.5703	0.000968043	0.0198831	-0.946762	tr|B4DRY5|B4DRY5_HUMAN cDNA FLJ54538, highly similar to Transportin-2 OS=Homo sapiens OX=9606 PE=2 SV=1;tr|A0A024R7F7|A0A024R7F7_HUMAN Transportin 2 (Importin 3, karyopherin beta 2b), isoform CRA_b OS=Homo sapiens OX=9606 GN=TNPO2 PE=4 SV=1;tr|Q4LE60|Q4LE6				B4DRY5	0.280494	20.6379	0.222236
26	36028;41027	A0A024QYZ0;P60059	Protein transport protein Sec61 subunit gamma	SEC61G	tr|A0A024QYZ0|A0A024QYZ0_HUMAN Sec61 gamma subunit, isoform CRA_a OS=Homo sapiens OX=9606 GN=SEC61G PE=3 SV=1;sp|P60059|SC61G_HUMAN Protein transport protein Sec61 subunit gamma OS=Homo sapiens OX=9606 GN=SEC61G PE=1 SV=1	A0A024QYZ0	72350	60642	61918	48036	80342	82060	82064	77399	62450	85085	67012	0			16.1427	15.888	15.9181	15.5518	16.2939	16.3244	16.3245	16.24	15.9304	16.3766	16.0321	A0A024QYZ0	0.364022		A0A024QYZ0	0.28028	16.099	3.04447	0.00416831	0.0422725	-2.29315	tr|A0A024QYZ0|A0A024QYZ0_HUMAN Sec61 gamma subunit, isoform CRA_a OS=Homo sapiens OX=9606 GN=SEC61G PE=3 SV=1;sp|P60059|SC61G_HUMAN Protein transport protein Sec61 subunit gamma OS=Homo sapiens OX=9606 GN=SEC61G PE=1 SV=1				A0A024QYZ0	0.28028	16.099	0.187326
6238	2319;16696;61384	Q96KR6	Protein FAM210B	FAM210B	sp|Q96KR6|F210B_HUMAN Protein FAM210B, mitochondrial OS=Homo sapiens OX=9606 GN=FAM210B PE=1 SV=2	Q96KR6	766630	604860	618660	567580	682050	770850	858750	772280	772330	742070	1053000	0			19.5482	19.2062	19.2388	19.1145	19.3795	19.5561	19.7119	19.5588	19.5589	19.5012	20.0061	Q96KR6	0.300445		Q96KR6	0.279924	19.4374	3.83976	0.000442104	0.0127801	-0.215528	sp|Q96KR6|F210B_HUMAN Protein FAM210B, mitochondrial OS=Homo sapiens OX=9606 GN=FAM210B PE=1 SV=2				Q96KR6	0.279924	19.4374	0.231677
2329	8520;40573;40904;63064;63655	E7EW84;A5YP36;B2RDH5;B4DEZ1;B3KXY5;B7Z6G5;Q8TAG9;Q9NTA6;B1AP46;Q9NUN4;F2Z3K0	Exocyst complex component 6	EXOC6;SEC15L3;DKFZp761I2124	tr|E7EW84|E7EW84_HUMAN Exocyst complex component OS=Homo sapiens OX=9606 GN=EXOC6 PE=1 SV=1;tr|A5YP36|A5YP36_HUMAN Exocyst complex component OS=Homo sapiens OX=9606 GN=SEC15L3 PE=2 SV=1;tr|B2RDH5|B2RDH5_HUMAN Exocyst complex component OS=Homo sapiens OX=96	E7EW84	1741800	1650800	1536700	1458300	1679700	1955300	2128200	1918000	1945900	1836800	1542900	0			20.7322	20.6547	20.5514	20.4759	20.6798	20.899	21.0212	20.8712	20.892	20.8088	20.5572	E7EW84	0.294885		E7EW84	0.279638	20.7586	4.1401	0.000180408	0.00787739	0.625844	tr|E7EW84|E7EW84_HUMAN Exocyst complex component OS=Homo sapiens OX=9606 GN=EXOC6 PE=1 SV=1;tr|A5YP36|A5YP36_HUMAN Exocyst complex component OS=Homo sapiens OX=9606 GN=SEC15L3 PE=2 SV=1;tr|B2RDH5|B2RDH5_HUMAN Exocyst complex component OS=Homo sapiens OX=96				E7EW84	0.279638	20.7586	0.24582
1738	3020;8328;15130;35380;52896	B4DIZ6;A0A140VJQ3;Q96DE0	U8 snoRNA-decapping enzyme	NUDT16	tr|B4DIZ6|B4DIZ6_HUMAN cDNA FLJ57941, highly similar to Nucleoside diphosphate-linked moiety X motif16 OS=Homo sapiens OX=9606 PE=2 SV=1;tr|A0A140VJQ3|A0A140VJQ3_HUMAN Testicular tissue protein Li 129 OS=Homo sapiens OX=9606 PE=2 SV=1;sp|Q96DE0|NUD16_HUMAN	B4DIZ6	2781600	2543100	2554400	2391100	2740400	2793900	3371700	3101400	3050500	3498800	2575400	0			21.4075	21.2782	21.2845	21.1892	21.386	21.4139	21.6851	21.5645	21.5406	21.7384	21.2964	B4DIZ6	0.298631		B4DIZ6	0.27941	21.4488	4.00372	0.000271764	0.0101005	0.240666	tr|B4DIZ6|B4DIZ6_HUMAN cDNA FLJ57941, highly similar to Nucleoside diphosphate-linked moiety X motif16 OS=Homo sapiens OX=9606 PE=2 SV=1;tr|A0A140VJQ3|A0A140VJQ3_HUMAN Testicular tissue protein Li 129 OS=Homo sapiens OX=9606 PE=2 SV=1;sp|Q96DE0|NUD16_HUMAN				B4DIZ6	0.27941	21.4488	0.234649
1869	13018;26115;41216	A0A1S5UZ29;C9IZQ6;H7BXZ5;J3QSW6;O60229	Kalirin	KALRN	tr|A0A1S5UZ29|A0A1S5UZ29_HUMAN Kalirin OS=Homo sapiens OX=9606 GN=KALRN PE=2 SV=1;tr|C9IZQ6|C9IZQ6_HUMAN HCG2022551, isoform CRA_j OS=Homo sapiens OX=9606 GN=KALRN PE=1 SV=1;tr|H7BXZ5|H7BXZ5_HUMAN Kalirin (Fragment) OS=Homo sapiens OX=9606 GN=KALRN PE=1 SV	A0A1S5UZ29	82339	78449	75491	61743	77422	81619	88263	86117	103190	95873	59589	0			16.3293	16.2595	16.204	15.914	16.2405	16.3166	16.4295	16.394	16.6549	16.5488	15.8628	A0A1S5UZ29	0.292094		A0A1S5UZ29	0.27934	16.3291	3.70948	0.000647501	0.0159987	-0.572137	tr|A0A1S5UZ29|A0A1S5UZ29_HUMAN Kalirin OS=Homo sapiens OX=9606 GN=KALRN PE=2 SV=1;tr|C9IZQ6|C9IZQ6_HUMAN HCG2022551, isoform CRA_j OS=Homo sapiens OX=9606 GN=KALRN PE=1 SV=1;tr|H7BXZ5|H7BXZ5_HUMAN Kalirin (Fragment) OS=Homo sapiens OX=9606 GN=KALRN PE=1 SV				A0A1S5UZ29	0.27934	16.3291	0.216529
873	10271;25773;45337	A0A2R8Y7G1;A0A024R9Z8;P35869;A0A1B0GVI7	Aryl hydrocarbon receptor	AHR	tr|A0A2R8Y7G1|A0A2R8Y7G1_HUMAN Aryl hydrocarbon receptor OS=Homo sapiens OX=9606 GN=AHR PE=1 SV=1;tr|A0A024R9Z8|A0A024R9Z8_HUMAN Aryl hydrocarbon receptor, isoform CRA_a OS=Homo sapiens OX=9606 GN=AHR PE=4 SV=1;sp|P35869|AHR_HUMAN Aryl hydrocarbon receptor	A0A2R8Y7G1	1172300	1152900	846860	792220	1102400	1181500	1307300	1186100	1235600	1160500	1134000	0			20.1609	20.1368	19.6918	19.5955	20.0722	20.1722	20.3182	20.1778	20.2368	20.1463	20.113	A0A2R8Y7G1	0.313984		A0A2R8Y7G1	0.278792	20.0709	3.33181	0.0019005	0.0293992	-1.57187	tr|A0A2R8Y7G1|A0A2R8Y7G1_HUMAN Aryl hydrocarbon receptor OS=Homo sapiens OX=9606 GN=AHR PE=1 SV=1;tr|A0A024R9Z8|A0A024R9Z8_HUMAN Aryl hydrocarbon receptor, isoform CRA_a OS=Homo sapiens OX=9606 GN=AHR PE=4 SV=1;sp|P35869|AHR_HUMAN Aryl hydrocarbon receptor				A0A2R8Y7G1	0.278792	20.0709	0.188317
6162	226;5257	Q96CS2;K7ES67	HAUS augmin-like complex subunit 1	HAUS1	sp|Q96CS2|HAUS1_HUMAN HAUS augmin-like complex subunit 1 OS=Homo sapiens OX=9606 GN=HAUS1 PE=1 SV=1;tr|K7ES67|K7ES67_HUMAN HAUS augmin-like complex subunit 1 (Fragment) OS=Homo sapiens OX=9606 GN=HAUS1 PE=1 SV=8	Q96CS2	1854100	1543500	1499600	1416400	1551900	1724200	1911600	1981900	2037300	1860300	1685800	0			20.8223	20.5578	20.5161	20.4338	20.5656	20.7175	20.8664	20.9184	20.9582	20.8271	20.685	Q96CS2	0.275022		Q96CS2	0.278402	20.7183	3.89721	0.000373096	0.0120705	-0.0565987	sp|Q96CS2|HAUS1_HUMAN HAUS augmin-like complex subunit 1 OS=Homo sapiens OX=9606 GN=HAUS1 PE=1 SV=1;tr|K7ES67|K7ES67_HUMAN HAUS augmin-like complex subunit 1 (Fragment) OS=Homo sapiens OX=9606 GN=HAUS1 PE=1 SV=8				Q96CS2	0.278402	20.7183	0.215123
5514	350;3475;4844;8716;11097;16569;18940;21595;28584;59988;67233	Q5T6V5;Q5T6V7;Q5T6V6	UPF0553 protein C9orf64	C9orf64	sp|Q5T6V5|QSPP_HUMAN Queuosine salvage protein OS=Homo sapiens OX=9606 GN=C9orf64 PE=1 SV=1;tr|Q5T6V7|Q5T6V7_HUMAN Queuosine salvage protein OS=Homo sapiens OX=9606 GN=C9orf64 PE=1 SV=1	Q5T6V5	2994100	2730500	2592300	2418400	2914000	3195800	3528600	3327100	3327900	3130000	3151500	0			21.5137	21.3807	21.3058	21.2056	21.4746	21.6077	21.7507	21.6658	21.6662	21.5777	21.5876	Q5T6V5	0.30217		Q5T6V5	0.277548	21.5149	4.04796	0.000238057	0.00923248	0.365057	sp|Q5T6V5|QSPP_HUMAN Queuosine salvage protein OS=Homo sapiens OX=9606 GN=C9orf64 PE=1 SV=1;tr|Q5T6V7|Q5T6V7_HUMAN Queuosine salvage protein OS=Homo sapiens OX=9606 GN=C9orf64 PE=1 SV=1				Q5T6V5	0.277548	21.5149	0.211677
6043	3979;26131;26892;36914;50920	Q8WU76;A0A087WUD7	Sec1 family domain-containing protein 2	SCFD2	sp|Q8WU76|SCFD2_HUMAN Sec1 family domain-containing protein 2 OS=Homo sapiens OX=9606 GN=SCFD2 PE=1 SV=2;tr|A0A087WUD7|A0A087WUD7_HUMAN Sec1 family domain-containing protein 2 OS=Homo sapiens OX=9606 GN=SCFD2 PE=1 SV=1	Q8WU76	166190	141440	140290	135100	138870	165500	202130	160570	176660	170550	161410	0			17.3425	17.1098	17.0981	17.0437	17.0834	17.3365	17.6249	17.2928	17.4306	17.3798	17.3004	Q8WU76	0.264433		Q8WU76	0.277458	17.2742	3.87098	0.000403205	0.012402	-0.129302	sp|Q8WU76|SCFD2_HUMAN Sec1 family domain-containing protein 2 OS=Homo sapiens OX=9606 GN=SCFD2 PE=1 SV=2;tr|A0A087WUD7|A0A087WUD7_HUMAN Sec1 family domain-containing protein 2 OS=Homo sapiens OX=9606 GN=SCFD2 PE=1 SV=1				Q8WU76	0.277458	17.2742	0.201232
5644	7426;52940;66303	Q6P4A7;Q8N1Q4;B1AMV7	Sideroflexin-4	SFXN4	sp|Q6P4A7|SFXN4_HUMAN Sideroflexin-4 OS=Homo sapiens OX=9606 GN=SFXN4 PE=1 SV=1;tr|Q8N1Q4|Q8N1Q4_HUMAN cDNA FLJ37976 fis, clone CTONG2010148 OS=Homo sapiens OX=9606 PE=2 SV=1	Q6P4A7	304310	281590	250690	228620	307690	333660	367140	337880	314990	303150	358560	0			18.2152	18.1032	17.9355	17.8026	18.2311	18.348	18.486	18.3662	18.2649	18.2097	18.4519	Q6P4A7	0.320815		Q6P4A7	0.277418	18.1962	3.66079	0.000745805	0.0171359	-0.703956	sp|Q6P4A7|SFXN4_HUMAN Sideroflexin-4 OS=Homo sapiens OX=9606 GN=SFXN4 PE=1 SV=1;tr|Q8N1Q4|Q8N1Q4_HUMAN cDNA FLJ37976 fis, clone CTONG2010148 OS=Homo sapiens OX=9606 PE=2 SV=1				Q6P4A7	0.277418	18.1962	0.189805
1601	10817;14513;14941;24393	A0A0S2Z4H2;P23297;Q5T7Y6;Q5T7Y5;Q5T7Y4	Protein S100-A1;Protein S100	S100A1	tr|A0A0S2Z4H2|A0A0S2Z4H2_HUMAN Protein S100 (Fragment) OS=Homo sapiens OX=9606 GN=S100A1 PE=2 SV=1;sp|P23297|S10A1_HUMAN Protein S100-A1 OS=Homo sapiens OX=9606 GN=S100A1 PE=1 SV=2;tr|Q5T7Y6|Q5T7Y6_HUMAN Protein S100 OS=Homo sapiens OX=9606 GN=S100A1 PE=1	A0A0S2Z4H2	5555100	4535800	4382700	4425700	4626900	5840600	5809500	5780300	5518600	5461600	21969000	0			22.4054	22.1129	22.0634	22.0775	22.1416	22.4777	22.47	22.4627	22.3959	22.3809	24.389	A0A0S2Z4H2	0.272635		A0A0S2Z4H2	0.277272	22.2988	4.0137	0.000263781	0.00992199	0.268662	tr|A0A0S2Z4H2|A0A0S2Z4H2_HUMAN Protein S100 (Fragment) OS=Homo sapiens OX=9606 GN=S100A1 PE=2 SV=1;sp|P23297|S10A1_HUMAN Protein S100-A1 OS=Homo sapiens OX=9606 GN=S100A1 PE=1 SV=2;tr|Q5T7Y6|Q5T7Y6_HUMAN Protein S100 OS=Homo sapiens OX=9606 GN=S100A1 PE=1				A0A0S2Z4H2	0.277272	22.2988	0.206099
2957	2176;7095;11710;13247;14578;29855;30556;33213;33221;33453;33598;33599;34550;51777;62812;64744	B3KTZ6			tr|B3KTZ6|B3KTZ6_HUMAN cDNA FLJ39001 fis, clone NT2RI2022584, highly similar to Pescadillo homolog 1 OS=Homo sapiens OX=9606 PE=2 SV=1	B3KTZ6	810110	690840	624860	553470	669850	757550	842050	813020	840440	777300	728700	0			19.6278	19.398	19.2532	19.0782	19.3535	19.531	19.6836	19.6329	19.6808	19.5681	19.475	B3KTZ6	0.280005		B3KTZ6	0.277162	19.4807	3.65921	0.000749214	0.0171359	-0.708206	tr|B3KTZ6|B3KTZ6_HUMAN cDNA FLJ39001 fis, clone NT2RI2022584, highly similar to Pescadillo homolog 1 OS=Homo sapiens OX=9606 PE=2 SV=1				B3KTZ6	0.277162	19.4807	0.186519
5539	21300	Q5UW39;Q9Y2K1	Zinc finger and BTB domain-containing protein 1	ZBTB1	tr|Q5UW39|Q5UW39_HUMAN L2 OS=Homo sapiens OX=9606 PE=2 SV=1;sp|Q9Y2K1|ZBTB1_HUMAN Zinc finger and BTB domain-containing protein 1 OS=Homo sapiens OX=9606 GN=ZBTB1 PE=1 SV=3	Q5UW39	330280	564340	247930	205050	301540	289390	368340	457650	397620	384550	360810	0			18.3333	19.1062	17.9196	17.6456	18.202	18.1427	18.4907	18.8039	18.601	18.5528	18.4609	Q5UW39	0.267032		Q5UW39	0.27687	18.3798	2.02092	0.0502114	0.119118	-4.49854	tr|Q5UW39|Q5UW39_HUMAN L2 OS=Homo sapiens OX=9606 PE=2 SV=1;sp|Q9Y2K1|ZBTB1_HUMAN Zinc finger and BTB domain-containing protein 1 OS=Homo sapiens OX=9606 GN=ZBTB1 PE=1 SV=3				Q5UW39	0.27687	18.3798	0.100988
1427	32262;41351	A0A0A0N0L2;A0A0A0N0L5;Q17RA0;P40189	Interleukin-6 receptor subunit beta	IL6ST	tr|A0A0A0N0L2|A0A0A0N0L2_HUMAN IL6ST isoform 4 OS=Homo sapiens OX=9606 GN=IL6ST PE=2 SV=1;tr|A0A0A0N0L5|A0A0A0N0L5_HUMAN IL6ST isoform 3 OS=Homo sapiens OX=9606 GN=IL6ST PE=2 SV=1;tr|Q17RA0|Q17RA0_HUMAN Interleukin 6 signal transducer (Gp130, oncostatin M	A0A0A0N0L2	54618	37622	38779	42206	49483	57331	72177	46002	48931	46640	61027	0			15.7371	15.1993	15.243	15.3652	15.5946	15.807	16.1393	15.4894	15.5785	15.5093	15.8972	A0A0A0N0L2	0.318554		A0A0A0N0L2	0.27685	15.5663	2.89286	0.006224	0.0487612	-2.65796	tr|A0A0A0N0L2|A0A0A0N0L2_HUMAN IL6ST isoform 4 OS=Homo sapiens OX=9606 GN=IL6ST PE=2 SV=1;tr|A0A0A0N0L5|A0A0A0N0L5_HUMAN IL6ST isoform 3 OS=Homo sapiens OX=9606 GN=IL6ST PE=2 SV=1;tr|Q17RA0|Q17RA0_HUMAN Interleukin 6 signal transducer (Gp130, oncostatin M				A0A0A0N0L2	0.27685	15.5663	0.144362
6648	29503	Q9NVA4	Transmembrane protein 184C	TMEM184C	sp|Q9NVA4|T184C_HUMAN Transmembrane protein 184C OS=Homo sapiens OX=9606 GN=TMEM184C PE=1 SV=2	Q9NVA4	407130	390350	367790	337670	359240	447590	424060	481710	453150	446110	460910	0			18.6351	18.5744	18.4885	18.3653	18.4546	18.7718	18.6939	18.8778	18.7896	18.767	18.8141	Q9NVA4	0.264212		Q9NVA4	0.27646	18.6418	4.11793	0.000192893	0.00818627	0.562876	sp|Q9NVA4|T184C_HUMAN Transmembrane protein 184C OS=Homo sapiens OX=9606 GN=TMEM184C PE=1 SV=2				Q9NVA4	0.27646	18.6418	0.199977
68	3291;3329;6960;7757;9111;10182;12341;12526;16000;18375;30086;30877;31097;31953;34848;44723;44935;47387;48088;48221;50328;58618;59451	A0A024QZJ6;A0A024QZJ4;B1PS43;P35749;Q7Z7R0;O14729;O14794;Q66K75	Myosin-11	MYH11	tr|A0A024QZJ6|A0A024QZJ6_HUMAN Myosin, heavy polypeptide 11, smooth muscle, isoform CRA_b OS=Homo sapiens OX=9606 GN=MYH11 PE=3 SV=1;tr|A0A024QZJ4|A0A024QZJ4_HUMAN Epididymis secretory sperm binding protein OS=Homo sapiens OX=9606 GN=MYH11 PE=2 SV=1;tr|B1P	A0A024QZJ6	1104000	999940	997770	982140	1121900	1257100	1262700	1263200	1244200	1266600	1433300	0			20.0743	19.9315	19.9283	19.9056	20.0975	20.2617	20.2681	20.2687	20.2468	20.2725	20.4509	A0A024QZJ6	0.303617		A0A024QZJ6	0.2761	20.1255	4.25056	0.000129076	0.00677272	0.94125	tr|A0A024QZJ6|A0A024QZJ6_HUMAN Myosin, heavy polypeptide 11, smooth muscle, isoform CRA_b OS=Homo sapiens OX=9606 GN=MYH11 PE=3 SV=1;tr|A0A024QZJ4|A0A024QZJ4_HUMAN Epididymis secretory sperm binding protein OS=Homo sapiens OX=9606 GN=MYH11 PE=2 SV=1;tr|B1P				A0A024QZJ6	0.2761	20.1255	0.201145
47	1226;21452	A0A024QZ97;Q9NW97	Transmembrane protein 51	TMEM51	tr|A0A024QZ97|A0A024QZ97_HUMAN Transmembrane protein 51, isoform CRA_b OS=Homo sapiens OX=9606 GN=TMEM51 PE=4 SV=1;sp|Q9NW97|TMM51_HUMAN Transmembrane protein 51 OS=Homo sapiens OX=9606 GN=TMEM51 PE=1 SV=1	A0A024QZ97	527290	504360	487910	451640	564550	586600	664250	646610	616580	553850	671380	0			19.0082	18.9441	18.8963	18.7848	19.1067	19.162	19.3414	19.3025	19.2339	19.0791	19.3568	A0A024QZ97	0.31545		A0A024QZ97	0.275772	19.0859	3.92542	0.00034315	0.0118172	0.0218239	tr|A0A024QZ97|A0A024QZ97_HUMAN Transmembrane protein 51, isoform CRA_b OS=Homo sapiens OX=9606 GN=TMEM51 PE=4 SV=1;sp|Q9NW97|TMM51_HUMAN Transmembrane protein 51 OS=Homo sapiens OX=9606 GN=TMEM51 PE=1 SV=1				A0A024QZ97	0.275772	19.0859	0.181311
4490	2339;5819;21107;26124	Q71UI9;P0C0S5;C9J0D1;A0A494C189;C9J386	Histone H2A.V;Histone H2A.Z;Histone H2A	H2AFV;H2AFZ	sp|Q71UI9|H2AV_HUMAN Histone H2A.V OS=Homo sapiens OX=9606 GN=H2AFV PE=1 SV=3;sp|P0C0S5|H2AZ_HUMAN Histone H2A.Z OS=Homo sapiens OX=9606 GN=H2AFZ PE=1 SV=2;tr|C9J0D1|C9J0D1_HUMAN Histone H2A OS=Homo sapiens OX=9606 GN=H2AFV PE=1 SV=1;tr|A0A494C189|A0A494C1	Q71UI9	39601000	35207000	33874000	30427000	35974000	39600000	43055000	45061000	39755000	43908000	31297000	0			25.239	25.0694	25.0137	24.8589	25.1004	25.239	25.3597	25.4254	25.2446	25.388	24.8995	Q71UI9	0.286104		Q71UI9	0.27506	25.1938	3.90637	0.000363108	0.011888	-0.0311678	sp|Q71UI9|H2AV_HUMAN Histone H2A.V OS=Homo sapiens OX=9606 GN=H2AFV PE=1 SV=3;sp|P0C0S5|H2AZ_HUMAN Histone H2A.Z OS=Homo sapiens OX=9606 GN=H2AFZ PE=1 SV=2;tr|C9J0D1|C9J0D1_HUMAN Histone H2A OS=Homo sapiens OX=9606 GN=H2AFV PE=1 SV=1;tr|A0A494C189|A0A494C1				Q71UI9	0.27506	25.1938	0.170786
662	25021;26038;36629;58262	K7EIY1;A0A024R7I4;Q9Y421;K7ELZ8;K7ENN5;B2R547	Protein FAM32A	FAM32A	tr|K7EIY1|K7EIY1_HUMAN Protein FAM32A OS=Homo sapiens OX=9606 GN=FAM32A PE=1 SV=1;tr|A0A024R7I4|A0A024R7I4_HUMAN Family with sequence similarity 32, member A, isoform CRA_a OS=Homo sapiens OX=9606 GN=FAM32A PE=4 SV=1;sp|Q9Y421|FA32A_HUMAN Protein FAM32A OS	K7EIY1	1901600	2079000	1474200	1423500	2132100	2013500	2304400	2186600	2129500	2120500	2781900	0			20.8588	20.9875	20.4915	20.441	21.0238	20.9413	21.136	21.0603	21.0221	21.016	21.4076	K7EIY1	0.340421		K7EIY1	0.27459	20.8978	3.23161	0.00250829	0.0342013	-1.82759	tr|K7EIY1|K7EIY1_HUMAN Protein FAM32A OS=Homo sapiens OX=9606 GN=FAM32A PE=1 SV=1;tr|A0A024R7I4|A0A024R7I4_HUMAN Family with sequence similarity 32, member A, isoform CRA_a OS=Homo sapiens OX=9606 GN=FAM32A PE=4 SV=1;sp|Q9Y421|FA32A_HUMAN Protein FAM32A OS				K7EIY1	0.27459	20.8978	0.135996
1038	9805;14611;15581;20997;23228;36365;42497;53713;57310;62252;62390	A0A024RC75;O14647;A0A1B0GTU9;A8K9Y5	Chromodomain-helicase-DNA-binding protein 2	CHD2	tr|A0A024RC75|A0A024RC75_HUMAN Chromodomain helicase DNA binding protein 2, isoform CRA_a OS=Homo sapiens OX=9606 GN=CHD2 PE=4 SV=1;sp|O14647|CHD2_HUMAN Chromodomain-helicase-DNA-binding protein 2 OS=Homo sapiens OX=9606 GN=CHD2 PE=1 SV=2;tr|A0A1B0GTU9|A0A	A0A024RC75	888540	766250	776010	702540	838160	940020	1010300	971840	944810	923910	948930	0			19.7611	19.5475	19.5657	19.4222	19.6769	19.8423	19.9463	19.8904	19.8497	19.8174	19.8559	A0A024RC75	0.295101		A0A024RC75	0.27455	19.7319	4.01655	0.000261543	0.00989742	0.276666	tr|A0A024RC75|A0A024RC75_HUMAN Chromodomain helicase DNA binding protein 2, isoform CRA_a OS=Homo sapiens OX=9606 GN=CHD2 PE=4 SV=1;sp|O14647|CHD2_HUMAN Chromodomain-helicase-DNA-binding protein 2 OS=Homo sapiens OX=9606 GN=CHD2 PE=1 SV=2;tr|A0A1B0GTU9|A0A				A0A024RC75	0.27455	19.7319	0.168468
6469	9;19816;34030;35701;41230;48818;49939;59213;65344	Q9H3H3	UPF0696 protein C11orf68	C11orf68	sp|Q9H3H3|CK068_HUMAN UPF0696 protein C11orf68 OS=Homo sapiens OX=9606 GN=C11orf68 PE=1 SV=3	Q9H3H3	6554300	6058400	5936200	5513500	6617900	7199200	7808500	7469300	7370300	7193100	6190200	0			22.644	22.5305	22.5011	22.3945	22.6579	22.7794	22.8966	22.8325	22.8133	22.7782	22.5616	Q9H3H3	0.302463		Q9H3H3	0.274384	22.6828	4.10857	0.000198407	0.00820432	0.53636	sp|Q9H3H3|CK068_HUMAN UPF0696 protein C11orf68 OS=Homo sapiens OX=9606 GN=C11orf68 PE=1 SV=3				Q9H3H3	0.274384	22.6828	0.169947
6775	12262;21966;22465;22466;23929;35542;40428;40429;42310;50175;61344;63174	Q9UHQ9;H7C0R7;B4DJ32	NADH-cytochrome b5 reductase 1	CYB5R1	sp|Q9UHQ9|NB5R1_HUMAN NADH-cytochrome b5 reductase 1 OS=Homo sapiens OX=9606 GN=CYB5R1 PE=1 SV=1;tr|H7C0R7|H7C0R7_HUMAN NADH-cytochrome b5 reductase 1 (Fragment) OS=Homo sapiens OX=9606 GN=CYB5R1 PE=1 SV=1	Q9UHQ9	11023000	10459000	9074700	8572900	10881000	11623000	13130000	12233000	11872000	11393000	13148000	0			23.394	23.3182	23.1134	23.0313	23.3753	23.4705	23.6464	23.5443	23.5011	23.4416	23.6483	Q9UHQ9	0.306509		Q9UHQ9	0.274298	23.3836	3.78788	0.000514948	0.0140408	-0.358196	sp|Q9UHQ9|NB5R1_HUMAN NADH-cytochrome b5 reductase 1 OS=Homo sapiens OX=9606 GN=CYB5R1 PE=1 SV=1;tr|H7C0R7|H7C0R7_HUMAN NADH-cytochrome b5 reductase 1 (Fragment) OS=Homo sapiens OX=9606 GN=CYB5R1 PE=1 SV=1				Q9UHQ9	0.274298	23.3836	0.155543
3364	2598	B7Z6Q9;Q6FG82;P06307	Cholecystokinin;Cholecystokinin-58;Cholecystokinin-58 desnonopeptide;Cholecystokinin-39;Cholecystokinin-33;Cholecystokinin-25;Cholecystokinin-18;Cholecystokinin-12;Cholecystokinin-8;Cholecystokinin-7;Cholecystokinin-5	CCK	tr|B7Z6Q9|B7Z6Q9_HUMAN cDNA FLJ51636, moderately similar to Cholecystokinins OS=Homo sapiens OX=9606 PE=2 SV=1;tr|Q6FG82|Q6FG82_HUMAN CCK protein (Fragment) OS=Homo sapiens OX=9606 GN=CCK PE=2 SV=1;sp|P06307|CCKN_HUMAN Cholecystokinin OS=Homo sapiens OX=96	B7Z6Q9	543030	522090	476550	406710	486390	493780	538890	542770	546160	876060	463100	0			19.0507	18.9939	18.8623	18.6336	18.8917	18.9135	19.0396	19.05	19.059	19.7407	18.821	B7Z6Q9	0.27542		B7Z6Q9	0.274096	19.0235	2.82592	0.00740544	0.052013	-2.81527	tr|B7Z6Q9|B7Z6Q9_HUMAN cDNA FLJ51636, moderately similar to Cholecystokinins OS=Homo sapiens OX=9606 PE=2 SV=1;tr|Q6FG82|Q6FG82_HUMAN CCK protein (Fragment) OS=Homo sapiens OX=9606 GN=CCK PE=2 SV=1;sp|P06307|CCKN_HUMAN Cholecystokinin OS=Homo sapiens OX=96				B7Z6Q9	0.274096	19.0235	0.114045
4473	21143;41380;46606;65008	P08138	Tumor necrosis factor receptor superfamily member 16	NGFR	sp|P08138|TNR16_HUMAN Tumor necrosis factor receptor superfamily member 16 OS=Homo sapiens OX=9606 GN=NGFR PE=1 SV=1	P08138	573470	655020	534000	422220	518270	558440	715630	693820	673070	608080	450770	0			19.1294	19.3212	19.0265	18.6876	18.9834	19.091	19.4489	19.4042	19.3604	19.2139	18.782	P08138	0.262513		P08138	0.274076	19.1666	3.28064	0.00219085	0.0321197	-1.70301	sp|P08138|TNR16_HUMAN Tumor necrosis factor receptor superfamily member 16 OS=Homo sapiens OX=9606 GN=NGFR PE=1 SV=1				P08138	0.274076	19.1666	0.132166
6465	1842;15919;16711;18891;18892;24178;25518;25519;35888;53390;63158	Q9H2U2;B4DR66;H0Y9D8;D6RGV9;B4DFH3;D6RGI1	Inorganic pyrophosphatase 2, mitochondrial	PPA2	sp|Q9H2U2|IPYR2_HUMAN Inorganic pyrophosphatase 2, mitochondrial OS=Homo sapiens OX=9606 GN=PPA2 PE=1 SV=2;tr|B4DR66|B4DR66_HUMAN cDNA FLJ60819, highly similar to Inorganic pyrophosphatase 2, mitochondrial OS=Homo sapiens OX=9606 PE=2 SV=1;tr|H0Y9D8|H0Y9D8	Q9H2U2	9408500	9258000	8301500	7677900	9567100	10378000	11072000	10402000	10107000	11330000	10267000	0			23.1655	23.1423	22.9849	22.8723	23.1897	23.307	23.4004	23.3104	23.2689	23.4337	23.2915	Q9H2U2	0.302805		Q9H2U2	0.273126	23.2075	3.92335	0.000345271	0.0118172	0.0160472	sp|Q9H2U2|IPYR2_HUMAN Inorganic pyrophosphatase 2, mitochondrial OS=Homo sapiens OX=9606 GN=PPA2 PE=1 SV=2;tr|B4DR66|B4DR66_HUMAN cDNA FLJ60819, highly similar to Inorganic pyrophosphatase 2, mitochondrial OS=Homo sapiens OX=9606 PE=2 SV=1;tr|H0Y9D8|H0Y9D8				Q9H2U2	0.273126	23.2075	0.144962
5850	1304;7393;21880;26256;36489;37527;51028;55790;65163	Q8IVS2	Malonyl-CoA-acyl carrier protein transacylase, mitochondrial	MCAT	sp|Q8IVS2|FABD_HUMAN Malonyl-CoA-acyl carrier protein transacylase, mitochondrial OS=Homo sapiens OX=9606 GN=MCAT PE=1 SV=2	Q8IVS2	1602300	1557000	1334000	1287200	1535600	1695900	1909600	1811000	1777300	1624400	1861200	0			20.6117	20.5703	20.3473	20.2958	20.5504	20.6936	20.8648	20.7884	20.7613	20.6315	20.8278	Q8IVS2	0.291615		Q8IVS2	0.2728	20.6115	3.83997	0.000441832	0.0127801	-0.214953	sp|Q8IVS2|FABD_HUMAN Malonyl-CoA-acyl carrier protein transacylase, mitochondrial OS=Homo sapiens OX=9606 GN=MCAT PE=1 SV=2				Q8IVS2	0.2728	20.6115	0.137462
2719	141;2548;13188;14790;26943;37817;40044;45104;45286;46443;57004	B2R7W0;P13995;B4DY35;B8ZZU9;B9A062;A0A0C4DG60;F8W7P9	Bifunctional methylenetetrahydrofolate dehydrogenase/cyclohydrolase, mitochondrial;NAD-dependent methylenetetrahydrofolate dehydrogenase;Methenyltetrahydrofolate cyclohydrolase	MTHFD2	tr|B2R7W0|B2R7W0_HUMAN cDNA, FLJ93628, Homo sapiens methylene tetrahydrofolate dehydrogenase (NAD+dependent), methenyltetrahydrofolate cyclohydrolase (MTHFD2),nuclear gene encoding mitochondrial protein, mRNA OS=Homo sapiens OX=9606 PE=1 SV=1;sp|P13995|MTD	B2R7W0	11213000	10007000	9765400	9361400	10622000	11793000	13067000	12763000	11891000	11987000	12680000	0			23.4187	23.2545	23.2192	23.1583	23.3406	23.4914	23.6394	23.6055	23.5034	23.515	23.5961	B2R7W0	0.288252		B2R7W0	0.272678	23.4146	4.06834	0.000223932	0.00879392	0.422549	tr|B2R7W0|B2R7W0_HUMAN cDNA, FLJ93628, Homo sapiens methylene tetrahydrofolate dehydrogenase (NAD+dependent), methenyltetrahydrofolate cyclohydrolase (MTHFD2),nuclear gene encoding mitochondrial protein, mRNA OS=Homo sapiens OX=9606 PE=1 SV=1;sp|P13995|MTD				B2R7W0	0.272678	23.4146	0.143882
3650	51406	E7EPP7;Q08AL9;Q6ZWJ1	Syntaxin-binding protein 4	STXBP4	tr|E7EPP7|E7EPP7_HUMAN Syntaxin-binding protein 4 OS=Homo sapiens OX=9606 GN=STXBP4 PE=1 SV=1;tr|Q08AL9|Q08AL9_HUMAN STXBP4 protein OS=Homo sapiens OX=9606 GN=STXBP4 PE=1 SV=1;sp|Q6ZWJ1|STXB4_HUMAN Syntaxin-binding protein 4 OS=Homo sapiens OX=9606 GN=STXB	E7EPP7	591900	586470	556800	503620	719760	723380	778170	704250	726750	625220	738480	0			19.175	19.1617	19.0868	18.942	19.4572	19.4644	19.5697	19.4257	19.4711	19.254	19.4942	E7EPP7	0.345623		E7EPP7	0.272464	19.3008	3.55437	0.00101324	0.0204746	-0.989182	tr|E7EPP7|E7EPP7_HUMAN Syntaxin-binding protein 4 OS=Homo sapiens OX=9606 GN=STXBP4 PE=1 SV=1;tr|Q08AL9|Q08AL9_HUMAN STXBP4 protein OS=Homo sapiens OX=9606 GN=STXBP4 PE=1 SV=1;sp|Q6ZWJ1|STXB4_HUMAN Syntaxin-binding protein 4 OS=Homo sapiens OX=9606 GN=STXB				E7EPP7	0.272464	19.3008	0.123012
1504	23244;43956;54959	Q4W5T8;A0A0D9SF60;Q99569;H0YFB1;E7EST6;Q6LCG8;B4DJU1;B3KXF4;B4DG58;B4DRK2;E9PHB5;B1P762;E7EPC8;Q9UQB3	Plakophilin-4	PKP4	tr|Q4W5T8|Q4W5T8_HUMAN Uncharacterized protein PKP4 (Fragment) OS=Homo sapiens OX=9606 GN=PKP4 PE=4 SV=1;tr|A0A0D9SF60|A0A0D9SF60_HUMAN Plakophilin-4 OS=Homo sapiens OX=9606 GN=PKP4 PE=1 SV=1;sp|Q99569|PKP4_HUMAN Plakophilin-4 OS=Homo sapiens OX=9606 GN=PK	Q4W5T8	702560	717760	604410	574000	794690	793750	860290	819170	789670	809040	703700	0			19.4223	19.4531	19.2052	19.1307	19.6	19.5983	19.7145	19.6438	19.5909	19.6258	19.4246	Q4W5T8	0.331851		Q4W5T8	0.272408	19.4985	3.6781	0.000709299	0.0166345	-0.657169	tr|Q4W5T8|Q4W5T8_HUMAN Uncharacterized protein PKP4 (Fragment) OS=Homo sapiens OX=9606 GN=PKP4 PE=4 SV=1;tr|A0A0D9SF60|A0A0D9SF60_HUMAN Plakophilin-4 OS=Homo sapiens OX=9606 GN=PKP4 PE=1 SV=1;sp|Q99569|PKP4_HUMAN Plakophilin-4 OS=Homo sapiens OX=9606 GN=PK				Q4W5T8	0.272408	19.4985	0.126564
2342	13054;16974;20014;38948;39658;49087;52867;62013;63041	B7ZVZ1;A6NMH6;A6NFQ9;F8W8I8;Q92599;A0A087X142;C9JV02;A0A0A0MRP8;C9J4G8	Septin-8	2019-09-08	tr|B7ZVZ1|B7ZVZ1_HUMAN SEPT8 protein OS=Homo sapiens OX=9606 GN=SEPT8 PE=2 SV=1;tr|A6NMH6|A6NMH6_HUMAN Septin 8 OS=Homo sapiens OX=9606 GN=SEPTIN8 PE=1 SV=1;tr|A6NFQ9|A6NFQ9_HUMAN Septin 8 OS=Homo sapiens OX=9606 GN=SEPTIN8 PE=1 SV=1;tr|F8W8I8|F8W8I8_HUMAN	B7ZVZ1	6419300	6265600	5526700	5020400	6698400	6916000	7742800	7338100	7093300	6881900	6013900	0			22.614	22.579	22.398	22.2594	22.6754	22.7215	22.8844	22.807	22.758	22.7144	22.5199	B7ZVZ1	0.314469		B7ZVZ1	0.271912	22.6411	3.73677	0.000597997	0.0153658	-0.497894	tr|B7ZVZ1|B7ZVZ1_HUMAN SEPT8 protein OS=Homo sapiens OX=9606 GN=SEPT8 PE=2 SV=1;tr|A6NMH6|A6NMH6_HUMAN Septin 8 OS=Homo sapiens OX=9606 GN=SEPTIN8 PE=1 SV=1;tr|A6NFQ9|A6NFQ9_HUMAN Septin 8 OS=Homo sapiens OX=9606 GN=SEPTIN8 PE=1 SV=1;tr|F8W8I8|F8W8I8_HUMAN				B7ZVZ1	0.271912	22.6411	0.122001
3547	568	K7EPS7;I3L2Z9;D3DTP5;I3L100;I3L2W2;Q96JN8	Neuralized-like protein 4	NEURL4;hCG_42028	tr|K7EPS7|K7EPS7_HUMAN Neuralized-like protein 4 (Fragment) OS=Homo sapiens OX=9606 GN=NEURL4 PE=1 SV=1;tr|I3L2Z9|I3L2Z9_HUMAN Neuralized-like protein 4 (Fragment) OS=Homo sapiens OX=9606 GN=NEURL4 PE=1 SV=1;tr|D3DTP5|D3DTP5_HUMAN HCG42028, isoform CRA_a O	K7EPS7	854820	677510	648660	561610	740040	792940	772480	999140	812240	804980	854310	0			19.7053	19.3699	19.3071	19.0992	19.4972	19.5968	19.5591	19.9303	19.6316	19.6186	19.7044	K7EPS7	0.29693		K7EPS7	0.271554	19.5315	3.27387	0.00223232	0.0324909	-1.72028	tr|K7EPS7|K7EPS7_HUMAN Neuralized-like protein 4 (Fragment) OS=Homo sapiens OX=9606 GN=NEURL4 PE=1 SV=1;tr|I3L2Z9|I3L2Z9_HUMAN Neuralized-like protein 4 (Fragment) OS=Homo sapiens OX=9606 GN=NEURL4 PE=1 SV=1;tr|D3DTP5|D3DTP5_HUMAN HCG42028, isoform CRA_a O				K7EPS7	0.271554	19.5315	0.102713
3167	1862;2618;4220;6141;7315;14547;16466;17315;22566;23503;25358;29715;30644;32985;34945;35816;39098;39388;46809;47033;48358;48550;49150;49632;50443;50444;51428;51477;51478;52604;52893;55377;57362;58989;59381;60143;60193;63378;63459;64690;67367	B4DQY2			tr|B4DQY2|B4DQY2_HUMAN MICOS complex subunit MIC60 OS=Homo sapiens OX=9606 PE=2 SV=1	B4DQY2	2816200	2660900	2680900	2381700	2677100	2833300	3280900	3185400	3137300	3532400	2126100	0			21.4253	21.3435	21.3543	21.1836	21.3522	21.434	21.6457	21.603	21.5811	21.7522	21.0198	B4DQY2	0.27655		B4DQY2	0.271434	21.4675	3.9388	0.000329782	0.0115683	0.0590846	tr|B4DQY2|B4DQY2_HUMAN MICOS complex subunit MIC60 OS=Homo sapiens OX=9606 PE=2 SV=1				B4DQY2	0.271434	21.4675	0.121887
2648	10462;27992;56270;62851	B1AKV6;B1AKV3;Q3KRB6;Q9NVA1;Q59FR0;B1AKV2;F6UTR7;F8WCR2;B7Z6D2;B7Z314;B1AKV4;H7BZM2;B7Z1C6	Ubiquinol-cytochrome-c reductase complex assembly factor 1	UQCC1;UQCC	tr|B1AKV6|B1AKV6_HUMAN Ubiquinol-cytochrome-c reductase complex assembly factor 1 (Fragment) OS=Homo sapiens OX=9606 GN=UQCC1 PE=1 SV=1;tr|B1AKV3|B1AKV3_HUMAN Ubiquinol-cytochrome-c reductase complex assembly factor 1 (Fragment) OS=Homo sapiens OX=9606 GN=	B1AKV6	5397200	5890500	4064800	3996200	5765200	5827000	6549300	5990100	5888000	5665700	6918000	0			22.3638	22.49	21.9548	21.9302	22.4589	22.4743	22.6429	22.5142	22.4894	22.4338	22.7219	B1AKV6	0.326238		B1AKV6	0.271384	22.3752	3.18671	0.00283693	0.0362714	-1.94076	tr|B1AKV6|B1AKV6_HUMAN Ubiquinol-cytochrome-c reductase complex assembly factor 1 (Fragment) OS=Homo sapiens OX=9606 GN=UQCC1 PE=1 SV=1;tr|B1AKV3|B1AKV3_HUMAN Ubiquinol-cytochrome-c reductase complex assembly factor 1 (Fragment) OS=Homo sapiens OX=9606 GN=				B1AKV6	0.271384	22.3752	0.0980446
5866	1116;1394;6376;28543;39031;43552;44854;50730;63339	Q8IXI1;H3BST5;I3L2C6;H3BUX4;H3BMP9;H3BVI5;H3BU27	Mitochondrial Rho GTPase 2	RHOT2	sp|Q8IXI1|MIRO2_HUMAN Mitochondrial Rho GTPase 2 OS=Homo sapiens OX=9606 GN=RHOT2 PE=1 SV=2;tr|H3BST5|H3BST5_HUMAN Mitochondrial Rho GTPase 2 (Fragment) OS=Homo sapiens OX=9606 GN=RHOT2 PE=1 SV=2;tr|I3L2C6|I3L2C6_HUMAN Mitochondrial Rho GTPase 2 (Fragment)	Q8IXI1	1278100	1288100	1066700	996210	1338200	1386500	1503500	1412300	1446300	1406400	1704900	0			20.2856	20.2968	20.0247	19.9261	20.3519	20.403	20.5199	20.4296	20.4639	20.4236	20.7013	Q8IXI1	0.314713		Q8IXI1	0.271	20.3125	3.67713	0.000711309	0.0166345	-0.659807	sp|Q8IXI1|MIRO2_HUMAN Mitochondrial Rho GTPase 2 OS=Homo sapiens OX=9606 GN=RHOT2 PE=1 SV=2;tr|H3BST5|H3BST5_HUMAN Mitochondrial Rho GTPase 2 (Fragment) OS=Homo sapiens OX=9606 GN=RHOT2 PE=1 SV=2;tr|I3L2C6|I3L2C6_HUMAN Mitochondrial Rho GTPase 2 (Fragment)				Q8IXI1	0.271	20.3125	0.108083
2544	8764;18060;23131;51202	B2RD40;A8K8A4;Q96FN4;H3BPR8;H3BUC8	Copine-2	CPNE2	tr|B2RD40|B2RD40_HUMAN cDNA, FLJ96442, highly similar to Homo sapiens copine II (CPNE2), mRNA OS=Homo sapiens OX=9606 PE=2 SV=1;tr|A8K8A4|A8K8A4_HUMAN cDNA FLJ77640, highly similar to Homo sapiens copine II (CPNE2), mRNA OS=Homo sapiens OX=9606 PE=2 SV=1;s	B2RD40	1966000	1745300	1746900	1630600	1942000	2097900	2408400	2180200	2183200	2018400	1947300	0			20.9068	20.735	20.7364	20.637	20.8891	21.0005	21.1996	21.056	21.058	20.9448	20.893	B2RD40	0.297992		B2RD40	0.27093	20.9163	3.91677	0.000352076	0.0118172	-0.00224836	tr|B2RD40|B2RD40_HUMAN cDNA, FLJ96442, highly similar to Homo sapiens copine II (CPNE2), mRNA OS=Homo sapiens OX=9606 PE=2 SV=1;tr|A8K8A4|A8K8A4_HUMAN cDNA FLJ77640, highly similar to Homo sapiens copine II (CPNE2), mRNA OS=Homo sapiens OX=9606 PE=2 SV=1;s				B2RD40	0.27093	20.9163	0.114145
5374	7368;16958;20718;25581;28537;29017	Q53FF6;Q53FD1;Q9UHR6;A0PJH8;E9PQB8	Zinc finger HIT domain-containing protein 2	ZNHIT2	tr|Q53FF6|Q53FF6_HUMAN Zinc finger, HIT domain containing 2 variant (Fragment) OS=Homo sapiens OX=9606 PE=2 SV=1;tr|Q53FD1|Q53FD1_HUMAN Zinc finger, HIT domain containing 2 variant (Fragment) OS=Homo sapiens OX=9606 PE=2 SV=1;sp|Q9UHR6|ZNHI2_HUMAN Zinc fin	Q53FF6	4844500	4293200	4124900	3940100	4449500	4804500	5660800	5300700	5364800	4955200	4733800	0			22.2079	22.0336	21.9759	21.9098	22.0852	22.196	22.4326	22.3377	22.3551	22.2405	22.1746	Q53FF6	0.28056		Q53FF6	0.269882	22.1774	3.90761	0.000361774	0.011888	-0.0277195	tr|Q53FF6|Q53FF6_HUMAN Zinc finger, HIT domain containing 2 variant (Fragment) OS=Homo sapiens OX=9606 PE=2 SV=1;tr|Q53FD1|Q53FD1_HUMAN Zinc finger, HIT domain containing 2 variant (Fragment) OS=Homo sapiens OX=9606 PE=2 SV=1;sp|Q9UHR6|ZNHI2_HUMAN Zinc fin				Q53FF6	0.269882	22.1774	0.099146
5924	9854;24380;47225	Q8N4P3;H0YNP9	Guanosine-3,5-bis(diphosphate) 3-pyrophosphohydrolase MESH1	HDDC3	sp|Q8N4P3|MESH1_HUMAN Guanosine-3,5-bis(diphosphate) 3-pyrophosphohydrolase MESH1 OS=Homo sapiens OX=9606 GN=HDDC3 PE=1 SV=3;tr|H0YNP9|H0YNP9_HUMAN Guanosine-3,5-bis(diphosphate) 3-pyrophosphohydrolase MESH1 OS=Homo sapiens OX=9606 GN=HDDC3 PE=1 SV=1	Q8N4P3	748490	604380	659260	649620	675350	764580	869310	757180	838410	789650	633560	0			19.5136	19.2051	19.3305	19.3092	19.3653	19.5443	19.7295	19.5303	19.6773	19.5908	19.2731	Q8N4P3	0.274838		Q8N4P3	0.269704	19.4796	3.93608	0.000332457	0.011597	0.051509	sp|Q8N4P3|MESH1_HUMAN Guanosine-3,5-bis(diphosphate) 3-pyrophosphohydrolase MESH1 OS=Homo sapiens OX=9606 GN=HDDC3 PE=1 SV=3;tr|H0YNP9|H0YNP9_HUMAN Guanosine-3,5-bis(diphosphate) 3-pyrophosphohydrolase MESH1 OS=Homo sapiens OX=9606 GN=HDDC3 PE=1 SV=1				Q8N4P3	0.269704	19.4796	0.0973366
4503	591;3075;5125;8026;8759;11246;14154;14155;18045;19921;22911;26030;26050;27676;27677;27911;28739;28957;30156;31887;36410;37116;38370;40348;42337;42338;43640;44182;45459;45946;56178;56186;57415;58670;59530;60087;60725;60726;60850;61755;61862;62797;65305;65337;65445;65995;66312	P11216;Q59GM9;B4DSD8;Q8TDG6;H0Y4Z6	Glycogen phosphorylase, brain form;Alpha-1,4 glucan phosphorylase	PYGB	sp|P11216|PYGB_HUMAN Glycogen phosphorylase, brain form OS=Homo sapiens OX=9606 GN=PYGB PE=1 SV=5;tr|Q59GM9|Q59GM9_HUMAN Alpha-1,4 glucan phosphorylase (Fragment) OS=Homo sapiens OX=9606 PE=2 SV=1;tr|B4DSD8|B4DSD8_HUMAN Alpha-1,4 glucan phosphorylase OS=Ho	P11216	81542000	74705000	71668000	66406000	79958000	86939000	93971000	91313000	88657000	89212000	78651000	0			26.281	26.1547	26.0948	25.9848	26.2527	26.3735	26.4857	26.4443	26.4017	26.4107	26.229	P11216	0.294353		P11216	0.269574	26.2884	3.99685	0.000277403	0.0102086	0.221383	sp|P11216|PYGB_HUMAN Glycogen phosphorylase, brain form OS=Homo sapiens OX=9606 GN=PYGB PE=1 SV=5;tr|Q59GM9|Q59GM9_HUMAN Alpha-1,4 glucan phosphorylase (Fragment) OS=Homo sapiens OX=9606 PE=2 SV=1;tr|B4DSD8|B4DSD8_HUMAN Alpha-1,4 glucan phosphorylase OS=Ho				P11216	0.269574	26.2884	0.0969595
6794	15515;18887;19337;37973;43574;44949;50497	Q9UJY5;B0QYR6;B0QYS5;B3KTE2;B0QYR9;B0QYS0;B0QYS1;B0QYS2;B0QYS3;B0QYR5;B0QYR8;A0A087WYN2;J3QRP3	ADP-ribosylation factor-binding protein GGA1	GGA1	sp|Q9UJY5|GGA1_HUMAN ADP-ribosylation factor-binding protein GGA1 OS=Homo sapiens OX=9606 GN=GGA1 PE=1 SV=1;tr|B0QYR6|B0QYR6_HUMAN ADP-ribosylation factor-binding protein GGA1 (Fragment) OS=Homo sapiens OX=9606 GN=GGA1 PE=1 SV=1;tr|B0QYS5|B0QYS5_HUMAN ADP-	Q9UJY5	4685600	4189200	4183000	4041800	4601400	5077300	5651600	5353700	5051400	5004800	5524300	0			22.1598	21.9982	21.9961	21.9466	22.1336	22.2756	22.4302	22.3521	22.2682	22.2549	22.3974	Q9UJY5	0.291038		Q9UJY5	0.269346	22.1815	4.0309	0.000250546	0.00959761	0.317014	sp|Q9UJY5|GGA1_HUMAN ADP-ribosylation factor-binding protein GGA1 OS=Homo sapiens OX=9606 GN=GGA1 PE=1 SV=1;tr|B0QYR6|B0QYR6_HUMAN ADP-ribosylation factor-binding protein GGA1 (Fragment) OS=Homo sapiens OX=9606 GN=GGA1 PE=1 SV=1;tr|B0QYS5|B0QYS5_HUMAN ADP-				Q9UJY5	0.269346	22.1815	0.0944561
6450	59298	Q9H1C7	Cysteine-rich and transmembrane domain-containing protein 1	CYSTM1	sp|Q9H1C7|CYTM1_HUMAN Cysteine-rich and transmembrane domain-containing protein 1 OS=Homo sapiens OX=9606 GN=CYSTM1 PE=1 SV=1	Q9H1C7	2268900	2209100	2041600	1963500	2632700	2468200	2868900	2682200	2411200	2936500	1799400	0			21.1136	21.075	20.9613	20.905	21.3281	21.235	21.4521	21.355	21.2013	21.4857	20.7791	Q9H1C7	0.332101		Q9H1C7	0.269222	21.2112	3.58502	0.000927991	0.0193146	-0.907465	sp|Q9H1C7|CYTM1_HUMAN Cysteine-rich and transmembrane domain-containing protein 1 OS=Homo sapiens OX=9606 GN=CYSTM1 PE=1 SV=1				Q9H1C7	0.269222	21.2112	0.0823953
3820	1610;5867;14921;26204;29999;45681;62387	F8WCF6;P59998;F8WDD7;A0A0A6YYG9;Q9H7Z5;H7C0A3;F8WE39;R4GN08;F8WDW3	Actin-related protein 2/3 complex subunit 4	ARPC4-TTLL3;ARPC4	tr|F8WCF6|F8WCF6_HUMAN Actin-related protein 2/3 complex subunit 4 OS=Homo sapiens OX=9606 GN=ARPC4-TTLL3 PE=3 SV=1;sp|P59998|ARPC4_HUMAN Actin-related protein 2/3 complex subunit 4 OS=Homo sapiens OX=9606 GN=ARPC4 PE=1 SV=3;tr|F8WDD7|F8WDD7_HUMAN Actin-re	F8WCF6	29351000	28359000	26964000	26359000	29484000	32919000	36237000	33099000	34394000	32589000	30008000	0			24.8069	24.7573	24.6845	24.6518	24.8134	24.9724	25.111	24.9803	25.0357	24.9579	24.8388	F8WCF6	0.286306		F8WCF6	0.268646	24.8771	4.11857	0.00019252	0.00818627	0.564697	tr|F8WCF6|F8WCF6_HUMAN Actin-related protein 2/3 complex subunit 4 OS=Homo sapiens OX=9606 GN=ARPC4-TTLL3 PE=3 SV=1;sp|P59998|ARPC4_HUMAN Actin-related protein 2/3 complex subunit 4 OS=Homo sapiens OX=9606 GN=ARPC4 PE=1 SV=3;tr|F8WDD7|F8WDD7_HUMAN Actin-re				F8WCF6	0.268646	24.8771	0.0860305
287	7384;8143;34380;56963	Q9BXW9;A0A024R2G2;H7BZJ7	Fanconi anemia group D2 protein	FANCD2	sp|Q9BXW9|FACD2_HUMAN Fanconi anemia group D2 protein OS=Homo sapiens OX=9606 GN=FANCD2 PE=1 SV=2;tr|A0A024R2G2|A0A024R2G2_HUMAN Fanconi anemia, complementation group D2, isoform CRA_b OS=Homo sapiens OX=9606 GN=FANCD2 PE=4 SV=1;tr|H7BZJ7|H7BZJ7_HUMAN Fanc	Q9BXW9	1377300	1378600	1252200	1101800	1426900	1499000	1691300	1539100	1495800	1622600	1614500	0			20.3934	20.3948	20.256	20.0714	20.4444	20.5156	20.6897	20.5537	20.5125	20.6299	20.6227	Q9BXW9	0.30135		Q9BXW9	0.268242	20.4461	3.76779	0.000546159	0.0144501	-0.413194	sp|Q9BXW9|FACD2_HUMAN Fanconi anemia group D2 protein OS=Homo sapiens OX=9606 GN=FANCD2 PE=1 SV=2;tr|A0A024R2G2|A0A024R2G2_HUMAN Fanconi anemia, complementation group D2, isoform CRA_b OS=Homo sapiens OX=9606 GN=FANCD2 PE=4 SV=1;tr|H7BZJ7|H7BZJ7_HUMAN Fanc				Q9BXW9	0.268242	20.4461	0.0731472
6109	1065;3018;7254;12070;17559;18253;18479;23609;27344;28068;29427;33306;34141;35898;36712;39339;42354;42456;44561;47025;47677;47678;49534;59989;60168;60769;64030	Q92896;H3BM42;Q6ZMF1;H3BQU9;H3BQT1;H3BRD8;REV__B7Z395	Golgi apparatus protein 1	GLG1	sp|Q92896|GSLG1_HUMAN Golgi apparatus protein 1 OS=Homo sapiens OX=9606 GN=GLG1 PE=1 SV=2;tr|H3BM42|H3BM42_HUMAN Golgi apparatus protein 1 OS=Homo sapiens OX=9606 GN=GLG1 PE=1 SV=1	Q92896	31876000	33414000	24056000	22083000	31913000	31868000	36022000	34140000	34271000	34007000	33201000	0			24.926	24.994	24.5199	24.3964	24.9276	24.9256	25.1024	25.025	25.0305	25.0193	24.9847	Q92896	0.311494		Q92896	0.267778	24.8867	3.17256	0.00294872	0.0368041	-1.97625	sp|Q92896|GSLG1_HUMAN Golgi apparatus protein 1 OS=Homo sapiens OX=9606 GN=GLG1 PE=1 SV=2;tr|H3BM42|H3BM42_HUMAN Golgi apparatus protein 1 OS=Homo sapiens OX=9606 GN=GLG1 PE=1 SV=1				Q92896	0.267778	24.8867	0.0562007
2323	1119;6817;40839	B7ZLB7;B7ZLB5;A5PLN9	Trafficking protein particle complex subunit 13	C5orf44;TRAPPC13	tr|B7ZLB7|B7ZLB7_HUMAN C5orf44 protein (Fragment) OS=Homo sapiens OX=9606 GN=C5orf44 PE=2 SV=1;tr|B7ZLB5|B7ZLB5_HUMAN C5orf44 protein (Fragment) OS=Homo sapiens OX=9606 GN=C5orf44 PE=2 SV=1;sp|A5PLN9|TPC13_HUMAN Trafficking protein particle complex subunit	B7ZLB7	1387100	1432500	1245200	1148400	1518100	1597400	1718300	1607300	1627300	1515900	1546500	0			20.4036	20.4501	20.2479	20.1312	20.5338	20.6073	20.7126	20.6162	20.634	20.5317	20.5606	B7ZLB7	0.312148		B7ZLB7	0.267026	20.4869	3.7292	0.000611351	0.0155262	-0.518516	tr|B7ZLB7|B7ZLB7_HUMAN C5orf44 protein (Fragment) OS=Homo sapiens OX=9606 GN=C5orf44 PE=2 SV=1;tr|B7ZLB5|B7ZLB5_HUMAN C5orf44 protein (Fragment) OS=Homo sapiens OX=9606 GN=C5orf44 PE=2 SV=1;sp|A5PLN9|TPC13_HUMAN Trafficking protein particle complex subunit				B7ZLB7	0.267026	20.4869	0.0557453
4603	5627;21049;24947;31930;33291;48800;60370;66767	P25391;Q7Z5W6;B3KSD8;B3KRN6;Q6P6D3	Laminin subunit alpha-1	LAMA1	sp|P25391|LAMA1_HUMAN Laminin subunit alpha-1 OS=Homo sapiens OX=9606 GN=LAMA1 PE=1 SV=2	P25391	1859300	2221000	1478400	1340000	1940000	1970100	2227400	2274900	1998600	2005400	1936900	0			20.8263	21.0828	20.4956	20.3538	20.8876	20.9098	21.0869	21.1174	20.9306	20.9355	20.8853	P25391	0.306402		P25391	0.266804	20.8626	2.9975	0.00472458	0.0438384	-2.40741	sp|P25391|LAMA1_HUMAN Laminin subunit alpha-1 OS=Homo sapiens OX=9606 GN=LAMA1 PE=1 SV=2				P25391	0.266804	20.8626	0.0423507
324	7593;46800	Q92551;A0A024R2X2;C9JNA8	Inositol hexakisphosphate kinase 1	IP6K1;IHPK1	sp|Q92551|IP6K1_HUMAN Inositol hexakisphosphate kinase 1 OS=Homo sapiens OX=9606 GN=IP6K1 PE=1 SV=3;tr|A0A024R2X2|A0A024R2X2_HUMAN Kinase OS=Homo sapiens OX=9606 GN=IHPK1 PE=3 SV=1;tr|C9JNA8|C9JNA8_HUMAN Kinase OS=Homo sapiens OX=9606 GN=IP6K1 PE=1 SV=1	Q92551	241420	279100	251390	223820	294620	324370	356920	300570	293060	276110	227700	0			17.8812	18.0904	17.9396	17.772	18.1685	18.3073	18.4452	18.1973	18.1608	18.0749	17.7968	Q92551	0.316326		Q92551	0.266784	18.1037	3.51296	0.00114048	0.0219789	-1.09907	sp|Q92551|IP6K1_HUMAN Inositol hexakisphosphate kinase 1 OS=Homo sapiens OX=9606 GN=IP6K1 PE=1 SV=3;tr|A0A024R2X2|A0A024R2X2_HUMAN Kinase OS=Homo sapiens OX=9606 GN=IHPK1 PE=3 SV=1;tr|C9JNA8|C9JNA8_HUMAN Kinase OS=Homo sapiens OX=9606 GN=IP6K1 PE=1 SV=1				Q92551	0.266784	18.1037	0.0493739
1646	49808	A0A0S2Z5C7;I3L419;A0A0S2Z5F0;I3L156;Q9BSJ6	Protein FAM64A	FAM64A	tr|A0A0S2Z5C7|A0A0S2Z5C7_HUMAN Family with sequence similarity 64 member A isoform 2 OS=Homo sapiens OX=9606 GN=FAM64A PE=2 SV=1;tr|I3L419|I3L419_HUMAN Protein PIMREG OS=Homo sapiens OX=9606 GN=PIMREG PE=1 SV=1;tr|A0A0S2Z5F0|A0A0S2Z5F0_HUMAN Family with se	A0A0S2Z5C7	928020	944680	728840	678470	857540	919790	1099100	951560	1001600	972230	1095700	0			19.8238	19.8495	19.4752	19.3719	19.7098	19.8109	20.0679	19.8599	19.9339	19.8909	20.0634	A0A0S2Z5C7	0.282608		A0A0S2Z5C7	0.266662	19.7794	3.40487	0.00154888	0.0268644	-1.38277	tr|A0A0S2Z5C7|A0A0S2Z5C7_HUMAN Family with sequence similarity 64 member A isoform 2 OS=Homo sapiens OX=9606 GN=FAM64A PE=2 SV=1;tr|I3L419|I3L419_HUMAN Protein PIMREG OS=Homo sapiens OX=9606 GN=PIMREG PE=1 SV=1;tr|A0A0S2Z5F0|A0A0S2Z5F0_HUMAN Family with se				A0A0S2Z5C7	0.266662	19.7794	0.0463188
1769	409;1761;3176;4110;5701;6576;10732;20449;29898;32741;36730;37741;38829;45686;45701;47512;48574;49012;56492;57121	A8K930;A0A140VK17;Q8NDI1;B5MC86;B3KM32;C9K0H9;C9IYU2;H7BZ98;C9J268;H7C0Q4;H7C1E6	EH domain-binding protein 1	EHBP1	tr|A8K930|A8K930_HUMAN cDNA FLJ75500, highly similar to Homo sapiens EH domain binding protein 1, mRNA OS=Homo sapiens OX=9606 PE=2 SV=1;tr|A0A140VK17|A0A140VK17_HUMAN EH domain binding protein 1, isoform CRA_a OS=Homo sapiens OX=9606 GN=EHBP1 PE=2 SV=1;sp	A8K930	9874100	9695100	8735600	8367000	9693900	10811000	11549000	11494000	11210000	10611000	12211000	0			23.2352	23.2088	23.0585	22.9963	23.2086	23.366	23.4613	23.4544	23.4183	23.3391	23.5417	A8K930	0.283096		A8K930	0.266308	23.2746	3.98482	0.000287547	0.0103783	0.187668	tr|A8K930|A8K930_HUMAN cDNA FLJ75500, highly similar to Homo sapiens EH domain binding protein 1, mRNA OS=Homo sapiens OX=9606 PE=2 SV=1;tr|A0A140VK17|A0A140VK17_HUMAN EH domain binding protein 1, isoform CRA_a OS=Homo sapiens OX=9606 GN=EHBP1 PE=2 SV=1;sp				A8K930	0.266308	23.2746	0.0489834
726	48670;48901;48902	H0Y5D5;A0A024R885;B7Z3U7;F5H2X7;Q9ULV3;Q96KB7;Q9BTG3;Q5SYW2;A0A494C0L7;B4E0A3	Cip1-interacting zinc finger protein	CIZ1	tr|H0Y5D5|H0Y5D5_HUMAN Cip1-interacting zinc finger protein (Fragment) OS=Homo sapiens OX=9606 GN=CIZ1 PE=1 SV=1;tr|A0A024R885|A0A024R885_HUMAN CDKN1A interacting zinc finger protein 1, isoform CRA_b OS=Homo sapiens OX=9606 GN=CIZ1 PE=4 SV=1;tr|B7Z3U7|B7Z3	H0Y5D5	618560	614130	556030	501030	619530	653800	734480	706380	719620	675970	579160	0			19.2386	19.2282	19.0848	18.9345	19.2408	19.3185	19.4864	19.4301	19.4569	19.3666	19.1436	H0Y5D5	0.290163		H0Y5D5	0.266304	19.2785	3.83723	0.000445411	0.0128163	-0.222504	tr|H0Y5D5|H0Y5D5_HUMAN Cip1-interacting zinc finger protein (Fragment) OS=Homo sapiens OX=9606 GN=CIZ1 PE=1 SV=1;tr|A0A024R885|A0A024R885_HUMAN CDKN1A interacting zinc finger protein 1, isoform CRA_b OS=Homo sapiens OX=9606 GN=CIZ1 PE=4 SV=1;tr|B7Z3U7|B7Z3				H0Y5D5	0.266304	19.2785	0.0471123
6530	841;30227;31256;42781;60538	Q9H9L3	Interferon-stimulated 20 kDa exonuclease-like 2	ISG20L2	sp|Q9H9L3|I20L2_HUMAN Interferon-stimulated 20 kDa exonuclease-like 2 OS=Homo sapiens OX=9606 GN=ISG20L2 PE=1 SV=1	Q9H9L3	188130	183920	166250	151110	165600	186420	208540	203480	213920	213840	193490	0			17.5214	17.4887	17.343	17.2052	17.3373	17.5082	17.67	17.6345	17.7067	17.7062	17.5619	Q9H9L3	0.255534		Q9H9L3	0.265982	17.5121	3.82815	0.000457488	0.0130696	-0.247538	sp|Q9H9L3|I20L2_HUMAN Interferon-stimulated 20 kDa exonuclease-like 2 OS=Homo sapiens OX=9606 GN=ISG20L2 PE=1 SV=1				Q9H9L3	0.265982	17.5121	0.0424233
3361	2950;4769;6322;11171;21687;21915;64749	B7Z6H4;O14802;Q7Z755;Q8TCW2;Q8TCW4;Q8TCW3	DNA-directed RNA polymerase;DNA-directed RNA polymerase III subunit RPC1	POLR3A	tr|B7Z6H4|B7Z6H4_HUMAN DNA-directed RNA polymerase subunit OS=Homo sapiens OX=9606 PE=2 SV=1;sp|O14802|RPC1_HUMAN DNA-directed RNA polymerase III subunit RPC1 OS=Homo sapiens OX=9606 GN=POLR3A PE=1 SV=2	B7Z6H4	1474800	1376800	1281400	1217900	1465500	1553700	1758900	1647100	1664400	1556500	1481300	0			20.4921	20.3929	20.2893	20.216	20.483	20.5673	20.7462	20.6515	20.6666	20.5699	20.4984	B7Z6H4	0.292734		B7Z6H4	0.265654	20.5075	3.87273	0.000401117	0.012402	-0.124439	tr|B7Z6H4|B7Z6H4_HUMAN DNA-directed RNA polymerase subunit OS=Homo sapiens OX=9606 PE=2 SV=1;sp|O14802|RPC1_HUMAN DNA-directed RNA polymerase III subunit RPC1 OS=Homo sapiens OX=9606 GN=POLR3A PE=1 SV=2				B7Z6H4	0.265654	20.5075	0.0381887
1607	6945;7446;12094;12103;16024;21894;22093;54659;58823	A0A0S2Z4K2;P62633;A0A0S2Z4Q3;A0A0S2Z4P7;Q6T598;D6RAT4	Cellular nucleic acid-binding protein	CNBP	tr|A0A0S2Z4K2|A0A0S2Z4K2_HUMAN CCHC-type zinc finger nucleic acid binding protein isoform 3 (Fragment) OS=Homo sapiens OX=9606 GN=CNBP PE=2 SV=1;sp|P62633|CNBP_HUMAN Cellular nucleic acid-binding protein OS=Homo sapiens OX=9606 GN=CNBP PE=1 SV=1;tr|A0A0S2Z	A0A0S2Z4K2	9190400	10032000	7354400	6466900	7963700	8605400	9341000	10087000	10372000	10421000	7231300	0			23.1317	23.2581	22.8102	22.6246	22.925	23.0368	23.1551	23.266	23.3062	23.313	22.7858	A0A0S2Z4K2	0.259269		A0A0S2Z4K2	0.265498	23.0827	3.15916	0.00305838	0.0375178	-2.00975	tr|A0A0S2Z4K2|A0A0S2Z4K2_HUMAN CCHC-type zinc finger nucleic acid binding protein isoform 3 (Fragment) OS=Homo sapiens OX=9606 GN=CNBP PE=2 SV=1;sp|P62633|CNBP_HUMAN Cellular nucleic acid-binding protein OS=Homo sapiens OX=9606 GN=CNBP PE=1 SV=1;tr|A0A0S2Z				A0A0S2Z4K2	0.265498	23.0827	0.0293143
1456	1259;6535;41586;54551;62849	B3KP31;A0A0B4J2A0;Q9UHJ6;B4DPJ0	Sedoheptulokinase	TRPV1;SHPK	tr|B3KP31|B3KP31_HUMAN cDNA FLJ31047 fis, clone HSYRA2000424, highly similar to Carbohydrate kinase-like protein OS=Homo sapiens OX=9606 PE=2 SV=1;tr|A0A0B4J2A0|A0A0B4J2A0_HUMAN Uncharacterized protein OS=Homo sapiens OX=9606 PE=1 SV=1;sp|Q9UHJ6|SHPK_HUMAN	B3KP31	5811500	5805900	4893200	4895800	6187700	7089700	7398400	6280800	6169400	6173400	4887800	0			22.4705	22.4691	22.2223	22.2231	22.561	22.7573	22.8188	22.5825	22.5567	22.5576	22.2207	B3KP31	0.308327		B3KP31	0.265384	22.5219	3.57276	0.000961236	0.0198084	-0.940201	tr|B3KP31|B3KP31_HUMAN cDNA FLJ31047 fis, clone HSYRA2000424, highly similar to Carbohydrate kinase-like protein OS=Homo sapiens OX=9606 PE=2 SV=1;tr|A0A0B4J2A0|A0A0B4J2A0_HUMAN Uncharacterized protein OS=Homo sapiens OX=9606 PE=1 SV=1;sp|Q9UHJ6|SHPK_HUMAN				B3KP31	0.265384	22.5219	0.0316316
322	10940;11387;21261;33089;39507	C9J8E1;B5BUJ8;B2R8Z2;A8K4K4;A0A024R2W7;Q16644;C9JPW3	MAP kinase-activated protein kinase 3	MAPKAPK3	tr|C9J8E1|C9J8E1_HUMAN MAP kinase-activated protein kinase 3 (Fragment) OS=Homo sapiens OX=9606 GN=MAPKAPK3 PE=1 SV=1;tr|B5BUJ8|B5BUJ8_HUMAN Mitogen-activated protein kinase-activated protein kinase 3 (Fragment) OS=Homo sapiens OX=9606 GN=MAPKAPK3 PE=2 SV=	C9J8E1	1562800	1509300	1310400	1253500	1668600	1732600	1885300	1748100	1693600	1676800	1405600	0			20.5757	20.5254	20.3216	20.2575	20.6702	20.7245	20.8464	20.7374	20.6917	20.6773	20.4228	C9J8E1	0.315369		C9J8E1	0.26534	20.6028	3.642	0.000787468	0.0175199	-0.754608	tr|C9J8E1|C9J8E1_HUMAN MAP kinase-activated protein kinase 3 (Fragment) OS=Homo sapiens OX=9606 GN=MAPKAPK3 PE=1 SV=1;tr|B5BUJ8|B5BUJ8_HUMAN Mitogen-activated protein kinase-activated protein kinase 3 (Fragment) OS=Homo sapiens OX=9606 GN=MAPKAPK3 PE=2 SV=				C9J8E1	0.26534	20.6028	0.0316461
6590	12474;16096;18160;28144;33131;45641;52970;63088	Q9NQ88;A0A0U1RQD1	Fructose-2,6-bisphosphatase TIGAR	TIGAR	sp|Q9NQ88|TIGAR_HUMAN Fructose-2,6-bisphosphatase TIGAR OS=Homo sapiens OX=9606 GN=TIGAR PE=1 SV=1;tr|A0A0U1RQD1|A0A0U1RQD1_HUMAN Chromosome 12 open reading frame 5, isoform CRA_b OS=Homo sapiens OX=9606 GN=TIGAR PE=1 SV=1	Q9NQ88	2249300	2058000	1941300	1794800	2080300	2206600	2381200	2343000	2456600	2782000	2465200	0			21.1011	20.9728	20.8886	20.7754	20.9884	21.0734	21.1833	21.1599	21.2282	21.4077	21.2333	Q9NQ88	0.27604		Q9NQ88	0.26526	21.0779	3.70976	0.000646965	0.0159987	-0.571364	sp|Q9NQ88|TIGAR_HUMAN Fructose-2,6-bisphosphatase TIGAR OS=Homo sapiens OX=9606 GN=TIGAR PE=1 SV=1;tr|A0A0U1RQD1|A0A0U1RQD1_HUMAN Chromosome 12 open reading frame 5, isoform CRA_b OS=Homo sapiens OX=9606 GN=TIGAR PE=1 SV=1				Q9NQ88	0.26526	21.0779	0.0311258
6049	13675;20576;27786;38587;49328;51025;66473	Q8WUD1;A0A3B3ITL1;Q5HYI5;B4DUD4;Q96K32	Ras-related protein Rab-2B	RAB2B;DKFZp313C1541	sp|Q8WUD1|RAB2B_HUMAN Ras-related protein Rab-2B OS=Homo sapiens OX=9606 GN=RAB2B PE=1 SV=1;tr|A0A3B3ITL1|A0A3B3ITL1_HUMAN Ras-related protein Rab-2B OS=Homo sapiens OX=9606 GN=RAB2B PE=1 SV=1;tr|Q5HYI5|Q5HYI5_HUMAN Uncharacterized protein DKFZp313C1541 OS	Q8WUD1	1617200	1445900	1360300	1313900	1581800	1710700	1921000	1781800	1724700	1638100	1516800	0			20.6251	20.4635	20.3755	20.3254	20.5931	20.7062	20.8734	20.7649	20.7179	20.6436	20.5326	Q8WUD1	0.293818		Q8WUD1	0.264666	20.6089	3.78633	0.000517297	0.0140435	-0.362451	sp|Q8WUD1|RAB2B_HUMAN Ras-related protein Rab-2B OS=Homo sapiens OX=9606 GN=RAB2B PE=1 SV=1;tr|A0A3B3ITL1|A0A3B3ITL1_HUMAN Ras-related protein Rab-2B OS=Homo sapiens OX=9606 GN=RAB2B PE=1 SV=1;tr|Q5HYI5|Q5HYI5_HUMAN Uncharacterized protein DKFZp313C1541 OS				Q8WUD1	0.264666	20.6089	0.0233417
5005	3099;3100;21337;34963;37618;50668;63413	Q01650;Q96QB2;Q2MCL6;A0A0C4DGL4;H0YJ95;G3V4Z6;B4DVT0;A0A0S2Z502;Q9UM01	Large neutral amino acids transporter small subunit 1	SLC7A5;lat1	sp|Q01650|LAT1_HUMAN Large neutral amino acids transporter small subunit 1 OS=Homo sapiens OX=9606 GN=SLC7A5 PE=1 SV=2;tr|Q96QB2|Q96QB2_HUMAN Sodium-independent neutral amino acid transporter LAT1 OS=Homo sapiens OX=9606 GN=lat1 PE=4 SV=1	Q01650	27624000	24185000	23228000	22265000	24229000	28580000	30866000	28992000	28455000	28754000	23646000	0			24.7194	24.5276	24.4694	24.4083	24.5302	24.7685	24.8795	24.7891	24.7622	24.7773	24.4951	Q01650	0.264155		Q01650	0.264342	24.6631	3.92732	0.000341226	0.0118172	0.0270959	sp|Q01650|LAT1_HUMAN Large neutral amino acids transporter small subunit 1 OS=Homo sapiens OX=9606 GN=SLC7A5 PE=1 SV=2;tr|Q96QB2|Q96QB2_HUMAN Sodium-independent neutral amino acid transporter LAT1 OS=Homo sapiens OX=9606 GN=lat1 PE=4 SV=1				Q01650	0.264342	24.6631	0.0194269
461	58684	A0A024R4V3;Q9NWS6	Protein FAM118A	C22orf8;FAM118A	tr|A0A024R4V3|A0A024R4V3_HUMAN Chromosome 22 open reading frame 8, isoform CRA_b OS=Homo sapiens OX=9606 GN=C22orf8 PE=4 SV=1;sp|Q9NWS6|F118A_HUMAN Protein FAM118A OS=Homo sapiens OX=9606 GN=FAM118A PE=1 SV=2	A0A024R4V3	90824	99547	84137	81653	105910	114120	126320	105630	107440	100490	76946	0			16.4708	16.6031	16.3605	16.3172	16.6925	16.8002	16.9467	16.6887	16.7132	16.6167	16.2316	A0A024R4V3	0.315199		A0A024R4V3	0.26428	16.6209	3.54063	0.00105388	0.0209567	-1.02573	tr|A0A024R4V3|A0A024R4V3_HUMAN Chromosome 22 open reading frame 8, isoform CRA_b OS=Homo sapiens OX=9606 GN=C22orf8 PE=4 SV=1;sp|Q9NWS6|F118A_HUMAN Protein FAM118A OS=Homo sapiens OX=9606 GN=FAM118A PE=1 SV=2				A0A024R4V3	0.26428	16.6209	0.0166875
6387	29212;56253	Q9BX67	Junctional adhesion molecule C	JAM3	sp|Q9BX67|JAM3_HUMAN Junctional adhesion molecule C OS=Homo sapiens OX=9606 GN=JAM3 PE=1 SV=1	Q9BX67	6771400	6949200	6126400	5678300	7381500	7911700	8125200	7923100	7670400	7726300	8450900	0			22.691	22.7284	22.5466	22.437	22.8155	22.9156	22.954	22.9176	22.8709	22.8814	23.0107	Q9BX67	0.307108		Q9BX67	0.264166	22.7758	3.79038	0.000511186	0.0140007	-0.35134	sp|Q9BX67|JAM3_HUMAN Junctional adhesion molecule C OS=Homo sapiens OX=9606 GN=JAM3 PE=1 SV=1				Q9BX67	0.264166	22.7758	0.0162367
1802	1345;49022;59464	A0A140VKD1;Q9Y3Q3;Q9UMB6;Q53HR4;Q8N2D9;G3V1J9;F5H4M7;B4E277	Transmembrane emp24 domain-containing protein 3	TMED3	tr|A0A140VKD1|A0A140VKD1_HUMAN Testis tissue sperm-binding protein Li 48e OS=Homo sapiens OX=9606 GN=TMED3 PE=2 SV=1;sp|Q9Y3Q3|TMED3_HUMAN Transmembrane emp24 domain-containing protein 3 OS=Homo sapiens OX=9606 GN=TMED3 PE=1 SV=1;tr|Q9UMB6|Q9UMB6_HUMAN p24	A0A140VKD1	853050	686270	635880	575750	579420	747390	944060	770620	918970	619640	755460	0			19.7023	19.3884	19.2784	19.1351	19.1442	19.5115	19.8485	19.5557	19.8097	19.2411	19.527	A0A140VKD1	0.217242		A0A140VKD1	0.2636	19.4615	2.83905	0.0071585	0.0508506	-2.78462	tr|A0A140VKD1|A0A140VKD1_HUMAN Testis tissue sperm-binding protein Li 48e OS=Homo sapiens OX=9606 GN=TMED3 PE=2 SV=1;sp|Q9Y3Q3|TMED3_HUMAN Transmembrane emp24 domain-containing protein 3 OS=Homo sapiens OX=9606 GN=TMED3 PE=1 SV=1;tr|Q9UMB6|Q9UMB6_HUMAN p24				A0A140VKD1	0.2636	19.4615	0.00609161
3792	3157;4989;18000;45083;55789	F8VVX6;Q5HYK3;F8VP53;F8VVW7;B4DP72	2-methoxy-6-polyprenyl-1,4-benzoquinol methylase, mitochondrial	COQ5	tr|F8VVX6|F8VVX6_HUMAN 2-methoxy-6-polyprenyl-1,4-benzoquinol methylase, mitochondrial (Fragment) OS=Homo sapiens OX=9606 GN=COQ5 PE=1 SV=1;sp|Q5HYK3|COQ5_HUMAN 2-methoxy-6-polyprenyl-1,4-benzoquinol methylase, mitochondrial OS=Homo sapiens OX=9606 GN=COQ5	F8VVX6	3374900	3185000	2958900	2787500	3262300	3663400	3888000	3814500	3672300	3612300	3616600	0			21.6864	21.6029	21.4966	21.4105	21.6375	21.8047	21.8906	21.8631	21.8083	21.7845	21.7862	F8VVX6	0.28112		F8VVX6	0.26345	21.6985	3.93991	0.000328699	0.0115683	0.062171	tr|F8VVX6|F8VVX6_HUMAN 2-methoxy-6-polyprenyl-1,4-benzoquinol methylase, mitochondrial (Fragment) OS=Homo sapiens OX=9606 GN=COQ5 PE=1 SV=1;sp|Q5HYK3|COQ5_HUMAN 2-methoxy-6-polyprenyl-1,4-benzoquinol methylase, mitochondrial OS=Homo sapiens OX=9606 GN=COQ5				F8VVX6	0.26345	21.6985	0.00621523
6168	8300;19433;29221;38784;47346;49677;62210	Q96D53;A0A024R0Q9;M0R001;M0R011;M0R362;M0QZZ2;M0R3F7	AarF domain-containing protein kinase 4	ADCK4	sp|Q96D53|COQ8B_HUMAN Atypical kinase COQ8B, mitochondrial OS=Homo sapiens OX=9606 GN=COQ8B PE=1 SV=2;tr|A0A024R0Q9|A0A024R0Q9_HUMAN AarF domain containing kinase 4, isoform CRA_b OS=Homo sapiens OX=9606 GN=ADCK4 PE=4 SV=1;tr|M0R001|M0R001_HUMAN Atypical k	Q96D53	1684800	1492900	1475600	1408800	1653800	1785800	1997900	1771200	1871400	1820500	1576900	0			20.6841	20.5097	20.4929	20.426	20.6574	20.7681	20.9301	20.7563	20.8357	20.7959	20.5887	Q96D53	0.289033		Q96D53	0.2632	20.6856	3.88531	0.000386469	0.0123143	-0.0895915	sp|Q96D53|COQ8B_HUMAN Atypical kinase COQ8B, mitochondrial OS=Homo sapiens OX=9606 GN=COQ8B PE=1 SV=2;tr|A0A024R0Q9|A0A024R0Q9_HUMAN AarF domain containing kinase 4, isoform CRA_b OS=Homo sapiens OX=9606 GN=ADCK4 PE=4 SV=1;tr|M0R001|M0R001_HUMAN Atypical k				Q96D53	0.2632	20.6856	0.00244447
6431	268;18440;20176;25833;35672;38805;39454;45089;50811;53236;61467;63988;65488	Q9GZS1;B4E005;E7EX70;B4DW33;B4DYB1	DNA-directed RNA polymerase I subunit RPA49	POLR1E	sp|Q9GZS1|RPA49_HUMAN DNA-directed RNA polymerase I subunit RPA49 OS=Homo sapiens OX=9606 GN=POLR1E PE=1 SV=3;tr|B4E005|B4E005_HUMAN cDNA FLJ54770, highly similar to DNA-directed RNA polymerase I-associated factor 53 kDa subunit OS=Homo sapiens OX=9606 PE=	Q9GZS1	8155900	7431700	7239900	6622800	7811100	8463600	9341600	9195100	9077600	8557300	8919300	0			22.9594	22.8253	22.7875	22.659	22.8971	23.0128	23.1552	23.1324	23.1139	23.0287	23.0885	Q9GZS1	0.280817		Q9GZS1	0.26296	22.9571	3.88525	0.000386547	0.0123143	-0.0897809	sp|Q9GZS1|RPA49_HUMAN DNA-directed RNA polymerase I subunit RPA49 OS=Homo sapiens OX=9606 GN=POLR1E PE=1 SV=3;tr|B4E005|B4E005_HUMAN cDNA FLJ54770, highly similar to DNA-directed RNA polymerase I-associated factor 53 kDa subunit OS=Homo sapiens OX=9606 PE=				Q9GZS1	0.26296	22.9571	0
5080	3693;11578;16430;36740;36813;37149;40217;52252;55251;61243	Q0D2N8;Q6SZW1;Q05B42;B4DXM0	Sterile alpha and TIR motif-containing protein 1	SARM1	tr|Q0D2N8|Q0D2N8_HUMAN SARM1 protein (Fragment) OS=Homo sapiens OX=9606 GN=SARM1 PE=1 SV=1;sp|Q6SZW1|SARM1_HUMAN Sterile alpha and TIR motif-containing protein 1 OS=Homo sapiens OX=9606 GN=SARM1 PE=1 SV=1;tr|Q05B42|Q05B42_HUMAN SARM1 protein (Fragment) OS=	Q0D2N8	301080	258680	259750	237560	282550	313250	337680	320750	329530	302090	293820	0			18.1998	17.9808	17.9868	17.8579	18.1081	18.2569	18.3653	18.2911	18.33	18.2046	18.1646	Q0D2N8	0.28328		Q0D2N8	0.262914	18.1581	3.81705	0.000472671	0.0133336	-0.278083	tr|Q0D2N8|Q0D2N8_HUMAN SARM1 protein (Fragment) OS=Homo sapiens OX=9606 GN=SARM1 PE=1 SV=1;sp|Q6SZW1|SARM1_HUMAN Sterile alpha and TIR motif-containing protein 1 OS=Homo sapiens OX=9606 GN=SARM1 PE=1 SV=1;tr|Q05B42|Q05B42_HUMAN SARM1 protein (Fragment) OS=				Q0D2N8	0.262914	18.1581	0
1182	1732;3785;10975;16202;29385;46056	A0A087WVF8;A0A0A0MRM1;A0A075B749;Q5VU43;A0A087WX83	Myomegalin	PDE4DIP	tr|A0A087WVF8|A0A087WVF8_HUMAN Myomegalin OS=Homo sapiens OX=9606 GN=PDE4DIP PE=1 SV=1;tr|A0A0A0MRM1|A0A0A0MRM1_HUMAN Myomegalin OS=Homo sapiens OX=9606 GN=PDE4DIP PE=1 SV=1;tr|A0A075B749|A0A075B749_HUMAN Myomegalin OS=Homo sapiens OX=9606 GN=PDE4DIP PE=1	A0A087WVF8	5504900	3960700	4328800	4610400	4553700	4831600	5932200	5300800	5954600	5444500	2915000	0			22.3923	21.9173	22.0455	22.1365	22.1186	22.2041	22.5001	22.3378	22.5056	22.3764	21.4751	A0A087WVF8	0.261886		A0A087WVF8	0.262744	22.2534	3.45989	0.00132607	0.0241399	-1.23893	tr|A0A087WVF8|A0A087WVF8_HUMAN Myomegalin OS=Homo sapiens OX=9606 GN=PDE4DIP PE=1 SV=1;tr|A0A0A0MRM1|A0A0A0MRM1_HUMAN Myomegalin OS=Homo sapiens OX=9606 GN=PDE4DIP PE=1 SV=1;tr|A0A075B749|A0A075B749_HUMAN Myomegalin OS=Homo sapiens OX=9606 GN=PDE4DIP PE=1				A0A087WVF8	0.262744	22.2534	0
1711	3251;7397;23921;25331;30562;41123;43179;50801;52734	A0A140VJE3;P50579;F8VQZ7;G3V1U3;B3KWL6;F8VRR3;Q96B43;F8VSC4;F8VZX9;F8VY03	Methionine aminopeptidase 2;Methionine aminopeptidase	METAP2	tr|A0A140VJE3|A0A140VJE3_HUMAN Methionine aminopeptidase 2 OS=Homo sapiens OX=9606 GN=METAP2 PE=2 SV=1;sp|P50579|MAP2_HUMAN Methionine aminopeptidase 2 OS=Homo sapiens OX=9606 GN=METAP2 PE=1 SV=1;tr|F8VQZ7|F8VQZ7_HUMAN Methionine aminopeptidase 2 OS=Homo s	A0A140VJE3	10860000	10872000	9477500	9181800	11413000	12059000	12802000	12644000	11971000	12471000	11534000	0			23.3725	23.3741	23.1761	23.1303	23.4442	23.5236	23.6099	23.592	23.513	23.5721	23.4594	A0A140VJE3	0.298845		A0A140VJE3	0.262664	23.4308	3.82005	0.000468517	0.0132974	-0.269825	tr|A0A140VJE3|A0A140VJE3_HUMAN Methionine aminopeptidase 2 OS=Homo sapiens OX=9606 GN=METAP2 PE=2 SV=1;sp|P50579|MAP2_HUMAN Methionine aminopeptidase 2 OS=Homo sapiens OX=9606 GN=METAP2 PE=1 SV=1;tr|F8VQZ7|F8VQZ7_HUMAN Methionine aminopeptidase 2 OS=Homo s				A0A140VJE3	0.262664	23.4308	0
233	61886	B4DXF5;A0A024R1T8;Q9NVR0	Kelch-like protein 11	KLHL11	tr|B4DXF5|B4DXF5_HUMAN cDNA FLJ51370, highly similar to Kelch-like protein 11 OS=Homo sapiens OX=9606 PE=2 SV=1;tr|A0A024R1T8|A0A024R1T8_HUMAN Kelch-like 11 (Drosophila), isoform CRA_a OS=Homo sapiens OX=9606 GN=KLHL11 PE=4 SV=1;sp|Q9NVR0|KLH11_HUMAN Kelch	B4DXF5	100910	76882	73800	53400	114380	111040	101400	100470	82454	93119	55768	0			16.6227	16.2304	16.1713	15.7045	16.8035	16.7607	16.6297	16.6164	16.3313	16.5068	15.7672	B4DXF5	0.386746		B4DXF5	0.2625	16.4377	2.34976	0.0239573	0.0848243	-3.86085	tr|B4DXF5|B4DXF5_HUMAN cDNA FLJ51370, highly similar to Kelch-like protein 11 OS=Homo sapiens OX=9606 PE=2 SV=1;tr|A0A024R1T8|A0A024R1T8_HUMAN Kelch-like 11 (Drosophila), isoform CRA_a OS=Homo sapiens OX=9606 GN=KLHL11 PE=4 SV=1;sp|Q9NVR0|KLH11_HUMAN Kelch				B4DXF5	0.2625	16.4377	0
6803	3401;24172;28493;32510;47231;48110;49784;50408	Q9UKE5	TRAF2 and NCK-interacting protein kinase	TNIK	sp|Q9UKE5|TNIK_HUMAN TRAF2 and NCK-interacting protein kinase OS=Homo sapiens OX=9606 GN=TNIK PE=1 SV=1	Q9UKE5	992350	903500	916700	865970	1025900	1094600	1187100	1143100	1121700	1086700	1073500	0			19.9205	19.7852	19.8061	19.724	19.9685	20.062	20.179	20.1245	20.0973	20.0515	20.0339	Q9UKE5	0.293928		Q9UKE5	0.262022	19.9718	3.94902	0.000319909	0.0113495	0.087594	sp|Q9UKE5|TNIK_HUMAN TRAF2 and NCK-interacting protein kinase OS=Homo sapiens OX=9606 GN=TNIK PE=1 SV=1				Q9UKE5	0.262022	19.9718	0
5356	607;14308;26968;30111;43666;65386	Q4VC31;C9JQ41;H7C525;C9JBU9	Coiled-coil domain-containing protein 58	CCDC58	sp|Q4VC31|CCD58_HUMAN Coiled-coil domain-containing protein 58 OS=Homo sapiens OX=9606 GN=CCDC58 PE=1 SV=1;tr|C9JQ41|C9JQ41_HUMAN Coiled-coil domain-containing protein 58 OS=Homo sapiens OX=9606 GN=CCDC58 PE=1 SV=1;tr|H7C525|H7C525_HUMAN Coiled-coil domain	Q4VC31	17156000	17248000	13687000	11817000	13357000	15381000	17052000	18380000	18246000	18019000	15661000	0			24.0322	24.0399	23.7063	23.4944	23.6711	23.8746	24.0234	24.1316	24.1211	24.103	23.9007	Q4VC31	0.232564		Q4VC31	0.261986	23.9198	3.19799	0.00275074	0.0357825	-1.91242	sp|Q4VC31|CCD58_HUMAN Coiled-coil domain-containing protein 58 OS=Homo sapiens OX=9606 GN=CCDC58 PE=1 SV=1;tr|C9JQ41|C9JQ41_HUMAN Coiled-coil domain-containing protein 58 OS=Homo sapiens OX=9606 GN=CCDC58 PE=1 SV=1;tr|H7C525|H7C525_HUMAN Coiled-coil domain				Q4VC31	0.261986	23.9198	0
6246	2661;24037;25026;47646;48552;52052;53117;56407;57119;65509	Q96M27	Protein PRRC1	PRRC1	sp|Q96M27|PRRC1_HUMAN Protein PRRC1 OS=Homo sapiens OX=9606 GN=PRRC1 PE=1 SV=1	Q96M27	17250000	16740000	14595000	14429000	18334000	20290000	21487000	18765000	18426000	18330000	19114000	0			24.0401	23.9968	23.799	23.7825	24.128	24.2743	24.357	24.1615	24.1352	24.1277	24.1881	Q96M27	0.30656		Q96M27	0.261872	24.0802	3.61522	0.000850755	0.0185806	-0.826598	sp|Q96M27|PRRC1_HUMAN Protein PRRC1 OS=Homo sapiens OX=9606 GN=PRRC1 PE=1 SV=1				Q96M27	0.261872	24.0802	0
6695	2417;3633;8832;8979;18077;31787;32821;33660;44413;45523;48988;58330;59006;62330;63759	Q9NY61;A0A087WWS8;A0A087WTH8;A0A087WW41	Protein AATF	AATF	sp|Q9NY61|AATF_HUMAN Protein AATF OS=Homo sapiens OX=9606 GN=AATF PE=1 SV=1	Q9NY61	6509100	5605600	5549800	5289400	6441300	7071900	7756600	6318200	6830200	7223000	6119500	0			22.634	22.4184	22.404	22.3347	22.6189	22.7537	22.887	22.5911	22.7035	22.7842	22.545	Q9NY61	0.296094		Q9NY61	0.261868	22.6129	3.66006	0.000747388	0.0171359	-0.705932	sp|Q9NY61|AATF_HUMAN Protein AATF OS=Homo sapiens OX=9606 GN=AATF PE=1 SV=1				Q9NY61	0.261868	22.6129	0
5911	17157;18165;23516;25390;35988;39621;40679;56648;63373;63480	Q8N2K0;Q5T712;I3L294;I3L440;I3L380;I3L1V0	Monoacylglycerol lipase ABHD12	ABHD12	sp|Q8N2K0|ABD12_HUMAN Lysophosphatidylserine lipase ABHD12 OS=Homo sapiens OX=9606 GN=ABHD12 PE=1 SV=2	Q8N2K0	4408200	3822000	3756400	3484900	4003600	5704000	5069300	4318000	4411000	3970900	4370800	0			22.0718	21.8659	21.8409	21.7327	21.9329	22.4435	22.2734	22.0419	22.0727	21.921	22.0595	Q8N2K0	0.272688		Q8N2K0	0.261678	22.0197	3.30115	0.00206977	0.030992	-1.65059	sp|Q8N2K0|ABD12_HUMAN Lysophosphatidylserine lipase ABHD12 OS=Homo sapiens OX=9606 GN=ABHD12 PE=1 SV=2				Q8N2K0	0.261678	22.0197	0
3454	919;9496;28854;30459;58123;59879	C9JCC6;Q14919;E9PNC7;E9PMW2	Dr1-associated corepressor	DRAP1	tr|C9JCC6|C9JCC6_HUMAN Dr1-associated corepressor OS=Homo sapiens OX=9606 GN=DRAP1 PE=1 SV=1;sp|Q14919|NC2A_HUMAN Dr1-associated corepressor OS=Homo sapiens OX=9606 GN=DRAP1 PE=1 SV=3	C9JCC6	7788800	7282400	6989300	6324000	7433200	8052600	9287800	8649700	8732900	8151100	7033600	0			22.893	22.796	22.7367	22.5924	22.8255	22.941	23.1469	23.0442	23.058	22.9586	22.7458	C9JCC6	0.275228		C9JCC6	0.261022	22.8992	3.81129	0.000480745	0.0134609	-0.293928	tr|C9JCC6|C9JCC6_HUMAN Dr1-associated corepressor OS=Homo sapiens OX=9606 GN=DRAP1 PE=1 SV=1;sp|Q14919|NC2A_HUMAN Dr1-associated corepressor OS=Homo sapiens OX=9606 GN=DRAP1 PE=1 SV=3				C9JCC6	0.261022	22.8992	0
1461	3832;24819;27258;35115;53976	A0A0B4J2G4;Q15345;Q562F1;B4DK79;A0A087X0S7;Q53F69;A0A0C4DH00;A0A087WTU1	Leucine-rich repeat-containing protein 41	LRRC41	tr|A0A0B4J2G4|A0A0B4J2G4_HUMAN Leucine-rich repeat-containing protein 41 OS=Homo sapiens OX=9606 GN=LRRC41 PE=1 SV=1;sp|Q15345|LRC41_HUMAN Leucine-rich repeat-containing protein 41 OS=Homo sapiens OX=9606 GN=LRRC41 PE=1 SV=3;tr|Q562F1|Q562F1_HUMAN LRRC41 p	A0A0B4J2G4	1883700	2504600	1349700	1239400	1904400	1812700	2189100	2087100	2079500	2155300	2022000	0			20.8451	21.2562	20.3642	20.2412	20.8609	20.7897	21.0619	20.9931	20.9878	21.0395	20.9474	A0A0B4J2G4	0.297712		A0A0B4J2G4	0.260868	20.844	2.45028	0.018879	0.076688	-3.65153	tr|A0A0B4J2G4|A0A0B4J2G4_HUMAN Leucine-rich repeat-containing protein 41 OS=Homo sapiens OX=9606 GN=LRRC41 PE=1 SV=1;sp|Q15345|LRC41_HUMAN Leucine-rich repeat-containing protein 41 OS=Homo sapiens OX=9606 GN=LRRC41 PE=1 SV=3;tr|Q562F1|Q562F1_HUMAN LRRC41 p				A0A0B4J2G4	0.260868	20.844	0
6872	13572;15273;15377;32512;40318;56699;59132	V9HWG4;Q9Y2I7;E9PDH4;F8WEZ0;C9JL08;Q6ZS32	1-phosphatidylinositol 3-phosphate 5-kinase	HEL37;PIKFYVE	tr|V9HWG4|V9HWG4_HUMAN Epididymis luminal protein 37 OS=Homo sapiens OX=9606 GN=HEL37 PE=2 SV=1;sp|Q9Y2I7|FYV1_HUMAN 1-phosphatidylinositol 3-phosphate 5-kinase OS=Homo sapiens OX=9606 GN=PIKFYVE PE=1 SV=3;tr|E9PDH4|E9PDH4_HUMAN 1-phosphatidylinositol 3-ph	V9HWG4	2343700	2283500	2032900	1938600	2263400	2492300	2730000	2630700	2582300	2550300	2212900	0			21.1604	21.1228	20.9551	20.8866	21.1101	21.2491	21.3805	21.327	21.3002	21.2822	21.0775	V9HWG4	0.27658		V9HWG4	0.260812	21.1774	3.86209	0.000413928	0.0125375	-0.153881	tr|V9HWG4|V9HWG4_HUMAN Epididymis luminal protein 37 OS=Homo sapiens OX=9606 GN=HEL37 PE=2 SV=1;sp|Q9Y2I7|FYV1_HUMAN 1-phosphatidylinositol 3-phosphate 5-kinase OS=Homo sapiens OX=9606 GN=PIKFYVE PE=1 SV=3;tr|E9PDH4|E9PDH4_HUMAN 1-phosphatidylinositol 3-ph				V9HWG4	0.260812	21.1774	0
893	947;3072;5764;6848;9691;10174;14168;30537;43073;61789	A0A024RAB0;A0A024RAB2;A0A024RAF7;A0A3B3ISF9;P42892;B4DKB2	Endothelin-converting enzyme 1	ECE1	tr|A0A024RAB0|A0A024RAB0_HUMAN Endothelin converting enzyme 1, isoform CRA_a OS=Homo sapiens OX=9606 GN=ECE1 PE=4 SV=1;tr|A0A024RAB2|A0A024RAB2_HUMAN Endothelin converting enzyme 1, isoform CRA_c OS=Homo sapiens OX=9606 GN=ECE1 PE=4 SV=1;tr|A0A024RAF7|A0A0	A0A024RAB0	6499200	6499000	5734100	5407300	7223600	7916000	8375800	7119200	7050500	7013000	6373800	0			22.6318	22.6318	22.4511	22.3665	22.7843	22.9163	22.9978	22.7633	22.7493	22.7416	22.6037	A0A024RAB0	0.313352		A0A024RAB0	0.260556	22.7034	3.49545	0.00119876	0.0226134	-1.14532	tr|A0A024RAB0|A0A024RAB0_HUMAN Endothelin converting enzyme 1, isoform CRA_a OS=Homo sapiens OX=9606 GN=ECE1 PE=4 SV=1;tr|A0A024RAB2|A0A024RAB2_HUMAN Endothelin converting enzyme 1, isoform CRA_c OS=Homo sapiens OX=9606 GN=ECE1 PE=4 SV=1;tr|A0A024RAF7|A0A0				A0A024RAB0	0.260556	22.7034	0
3759	1110;1111;7618;9254;12171;12593;17411;17412;21609;23376;24218;24299;26570;27659;28284;34276;34693;37365;41199;44423;47882;59964;60048;61819;65056;65647	F5GZS6;J3KPF3;P08195;H0YFS2	4F2 cell-surface antigen heavy chain	SLC3A2	tr|F5GZS6|F5GZS6_HUMAN 4F2 cell-surface antigen heavy chain OS=Homo sapiens OX=9606 GN=SLC3A2 PE=1 SV=1;tr|J3KPF3|J3KPF3_HUMAN 4F2 cell-surface antigen heavy chain OS=Homo sapiens OX=9606 GN=SLC3A2 PE=1 SV=1;sp|P08195|4F2_HUMAN 4F2 cell-surface antigen hea	F5GZS6	99924000	87837000	85571000	78554000	91438000	100970000	110340000	108970000	105420000	103910000	87943000	0			26.5743	26.3883	26.3506	26.2272	26.4463	26.5893	26.7174	26.6994	26.6516	26.6308	26.3901	F5GZS6	0.272572		F5GZS6	0.260336	26.5275	3.81605	0.000474066	0.0133336	-0.280841	tr|F5GZS6|F5GZS6_HUMAN 4F2 cell-surface antigen heavy chain OS=Homo sapiens OX=9606 GN=SLC3A2 PE=1 SV=1;tr|J3KPF3|J3KPF3_HUMAN 4F2 cell-surface antigen heavy chain OS=Homo sapiens OX=9606 GN=SLC3A2 PE=1 SV=1;sp|P08195|4F2_HUMAN 4F2 cell-surface antigen hea				F5GZS6	0.260336	26.5275	0
423	843;844;3341;3928;3929;6603;6604;11772;11809;11810;11811;16585;17442;18884;21511;21802;22532;23299;23300;24169;25423;30208;30433;31125;32844;32859;33050;34634;42934;44683;46754;47105;52623;56424;57005;58017;60281;60840;60841;61151;63310;64190;64191;64263;64264;64754	P19338;A0A024R4A0;B3KTP9;B3KM80;Q6ZS99;Q9BQ02;H7BY16;C9JLB1;C9JYW2;C9JWL1;C9J1H7;REV__Q9BQ02;REV__Q6ZS99;REV__B3KTP9;REV__A0A024R4A0;REV__P19338;REV__B3KM80	Nucleolin	NCL	sp|P19338|NUCL_HUMAN Nucleolin OS=Homo sapiens OX=9606 GN=NCL PE=1 SV=3;tr|A0A024R4A0|A0A024R4A0_HUMAN Nucleolin, isoform CRA_b OS=Homo sapiens OX=9606 GN=NCL PE=4 SV=1;tr|B3KTP9|B3KTP9_HUMAN cDNA FLJ38578 fis, clone HCHON2007674, highly similar to NUCLEOL	P19338	386130000	341100000	324960000	308870000	350370000	376420000	442360000	411500000	425890000	391100000	360100000	0			28.5245	28.3456	28.2757	28.2024	28.3843	28.4878	28.7206	28.6163	28.6659	28.543	28.4238	P19338	0.269658		P19338	0.26021	28.4766	3.74051	0.000591507	0.0153252	-0.487705	sp|P19338|NUCL_HUMAN Nucleolin OS=Homo sapiens OX=9606 GN=NCL PE=1 SV=3;tr|A0A024R4A0|A0A024R4A0_HUMAN Nucleolin, isoform CRA_b OS=Homo sapiens OX=9606 GN=NCL PE=4 SV=1;tr|B3KTP9|B3KTP9_HUMAN cDNA FLJ38578 fis, clone HCHON2007674, highly similar to NUCLEOL				P19338	0.26021	28.4766	0
3546	6111;7016;8306;9806;10873;11929;17123;18308;20865;21448;26074;27958;30764;33104;35666;37325;42287;43316;44099;44279;44324;44969;50062;51602;52832;56888;57670;58834;62560;63090;63949;65002;66672	D3DTH7		MYO1C	tr|D3DTH7|D3DTH7_HUMAN Myosin IC, isoform CRA_a OS=Homo sapiens OX=9606 GN=MYO1C PE=3 SV=1	D3DTH7	1182100	1496300	839210	715180	1562700	1270400	1386800	1313100	1334500	1318500	1404300	0			20.1729	20.513	19.6787	19.4479	20.5756	20.2768	20.4033	20.3245	20.3479	20.3305	20.4214	D3DTH7	0.383484		D3DTH7	0.258988	20.2071	2.16795	0.0363457	0.102459	-4.22265	tr|D3DTH7|D3DTH7_HUMAN Myosin IC, isoform CRA_a OS=Homo sapiens OX=9606 GN=MYO1C PE=3 SV=1				D3DTH7	0.258988	20.2071	0
6865	2240;17538;33480;44260;56877	Q9Y296;E9PKS9;E9PQE8;J3KP27;B4DF86;E9PN70;G3V1A0;G5EA23;B4DF36	Trafficking protein particle complex subunit 4	TRAPPC4	sp|Q9Y296|TPPC4_HUMAN Trafficking protein particle complex subunit 4 OS=Homo sapiens OX=9606 GN=TRAPPC4 PE=1 SV=1;tr|E9PKS9|E9PKS9_HUMAN Trafficking protein particle complex subunit 4 OS=Homo sapiens OX=9606 GN=TRAPPC4 PE=1 SV=1;tr|E9PQE8|E9PQE8_HUMAN Traf	Q9Y296	1925600	2128600	1655200	1502800	2083500	2193900	2432400	2152500	2191900	2070000	1924800	0			20.8769	21.0215	20.6586	20.5192	20.9906	21.0651	21.214	21.0376	21.0637	20.9812	20.8763	Q9Y296	0.303272		Q9Y296	0.258964	20.9428	3.30819	0.00202966	0.0307891	-1.63254	sp|Q9Y296|TPPC4_HUMAN Trafficking protein particle complex subunit 4 OS=Homo sapiens OX=9606 GN=TRAPPC4 PE=1 SV=1;tr|E9PKS9|E9PKS9_HUMAN Trafficking protein particle complex subunit 4 OS=Homo sapiens OX=9606 GN=TRAPPC4 PE=1 SV=1;tr|E9PQE8|E9PQE8_HUMAN Traf				Q9Y296	0.258964	20.9428	0
5527	13773;13774;32615;50532;50858;54969;67216	Q5TEC6	Histone H3	HIST2H3PS2	tr|Q5TEC6|Q5TEC6_HUMAN Histone H3 OS=Homo sapiens OX=9606 GN=HIST2H3PS2 PE=1 SV=1	Q5TEC6	320260000	305720000	296280000	274510000	320960000	361450000	379070000	373920000	347880000	350430000	305270000	0			28.2547	28.1876	28.1424	28.0323	28.2578	28.4292	28.4979	28.4782	28.374	28.3846	28.1855	Q5TEC6	0.278521		Q5TEC6	0.257806	28.3039	3.90522	0.000364344	0.011888	-0.0343529	tr|Q5TEC6|Q5TEC6_HUMAN Histone H3 OS=Homo sapiens OX=9606 GN=HIST2H3PS2 PE=1 SV=1				Q5TEC6	0.257806	28.3039	0
4538	2339;5924;26124;32814;36822;42895;58776;61300	P16104;Q96QV6	Histone H2AX;Histone H2A type 1-A	H2AFX;HIST1H2AA	sp|P16104|H2AX_HUMAN Histone H2AX OS=Homo sapiens OX=9606 GN=H2AFX PE=1 SV=2;sp|Q96QV6|H2A1A_HUMAN Histone H2A type 1-A OS=Homo sapiens OX=9606 GN=HIST1H2AA PE=1 SV=3	P16104	201260000	182720000	184530000	169850000	216420000	226150000	242430000	232640000	219340000	217520000	195540000	0			27.5845	27.4451	27.4593	27.3397	27.6893	27.7527	27.853	27.7935	27.7086	27.6966	27.5429	P16104	0.303744		P16104	0.257318	27.6322	3.71444	0.000638214	0.01594	-0.558655	sp|P16104|H2AX_HUMAN Histone H2AX OS=Homo sapiens OX=9606 GN=H2AFX PE=1 SV=2;sp|Q96QV6|H2A1A_HUMAN Histone H2A type 1-A OS=Homo sapiens OX=9606 GN=HIST1H2AA PE=1 SV=3				P16104	0.257318	27.6322	0
6508	3406;6310;16553;64013	Q9H7Z3;A0A024R6L8;Q0VFW7;G3V338;Q658X2	Protein NRDE2 homolog	NRDE2;C14orf102	sp|Q9H7Z3|NRDE2_HUMAN Protein NRDE2 homolog OS=Homo sapiens OX=9606 GN=NRDE2 PE=1 SV=3;tr|A0A024R6L8|A0A024R6L8_HUMAN Chromosome 14 open reading frame 102, isoform CRA_c OS=Homo sapiens OX=9606 GN=C14orf102 PE=4 SV=1;tr|Q0VFW7|Q0VFW7_HUMAN C14orf102 protei	Q9H7Z3	1669600	1800400	1532700	1556900	1795600	1858900	2353300	1762600	2039700	1996900	1753800	0			20.6711	20.7799	20.5476	20.5703	20.776	20.826	21.1663	20.7493	20.9599	20.9293	20.742	Q9H7Z3	0.283945		Q9H7Z3	0.25718	20.7976	3.49921	0.00118601	0.0224408	-1.13541	sp|Q9H7Z3|NRDE2_HUMAN Protein NRDE2 homolog OS=Homo sapiens OX=9606 GN=NRDE2 PE=1 SV=3;tr|A0A024R6L8|A0A024R6L8_HUMAN Chromosome 14 open reading frame 102, isoform CRA_c OS=Homo sapiens OX=9606 GN=C14orf102 PE=4 SV=1;tr|Q0VFW7|Q0VFW7_HUMAN C14orf102 protei				Q9H7Z3	0.25718	20.7976	0
3719	16627;28891;31558;40094;50927	E9PM92;O00193;E9PRZ9;E9PQA1	Small acidic protein	C11orf58;SMAP	tr|E9PM92|E9PM92_HUMAN Chromosome 11 open reading frame 58 OS=Homo sapiens OX=9606 GN=C11orf58 PE=1 SV=2;sp|O00193|SMAP_HUMAN Small acidic protein OS=Homo sapiens OX=9606 GN=SMAP PE=1 SV=1;tr|E9PRZ9|E9PRZ9_HUMAN Chromosome 11 open reading frame 58 (Fragmen	E9PM92	18612000	18792000	16220000	15382000	21463000	22470000	23843000	20880000	20142000	20254000	18900000	0			24.1497	24.1636	23.9513	23.8747	24.3554	24.4215	24.5071	24.3156	24.2637	24.2717	24.1719	E9PM92	0.321076		E9PM92	0.256974	24.2274	3.36862	0.00171479	0.027956	-1.47688	tr|E9PM92|E9PM92_HUMAN Chromosome 11 open reading frame 58 OS=Homo sapiens OX=9606 GN=C11orf58 PE=1 SV=2;sp|O00193|SMAP_HUMAN Small acidic protein OS=Homo sapiens OX=9606 GN=SMAP PE=1 SV=1;tr|E9PRZ9|E9PRZ9_HUMAN Chromosome 11 open reading frame 58 (Fragmen				E9PM92	0.256974	24.2274	0
4646	3685;16942;20013;25168;31413;36444;49459;57162;61313;63015	V9HW35;P30044	Peroxiredoxin-5, mitochondrial	HEL-S-55;PRDX5	tr|V9HW35|V9HW35_HUMAN Peroxiredoxin OS=Homo sapiens OX=9606 GN=HEL-S-55 PE=2 SV=1;sp|P30044|PRDX5_HUMAN Peroxiredoxin-5, mitochondrial OS=Homo sapiens OX=9606 GN=PRDX5 PE=1 SV=4	V9HW35	42943000	40590000	36991000	35660000	43026000	46292000	50182000	47236000	46121000	47601000	40731000	0			25.3559	25.2746	25.1407	25.0878	25.3587	25.4643	25.5807	25.4934	25.4589	25.5045	25.2796	V9HW35	0.285592		V9HW35	0.2568	25.3719	3.78282	0.000522636	0.0140502	-0.372049	tr|V9HW35|V9HW35_HUMAN Peroxiredoxin OS=Homo sapiens OX=9606 GN=HEL-S-55 PE=2 SV=1;sp|P30044|PRDX5_HUMAN Peroxiredoxin-5, mitochondrial OS=Homo sapiens OX=9606 GN=PRDX5 PE=1 SV=4				V9HW35	0.2568	25.3719	0
2547	17279;59088	A8K8D2;Q71F23;D6R9S4;Q09GN1;A5D8X7	Centromere protein U	CENPU;MLF1IP	tr|A8K8D2|A8K8D2_HUMAN cDNA FLJ77371, highly similar to Homo sapiens MLF1 interacting protein (MLF1IP), mRNA OS=Homo sapiens OX=9606 PE=2 SV=1;sp|Q71F23|CENPU_HUMAN Centromere protein U OS=Homo sapiens OX=9606 GN=CENPU PE=1 SV=1;tr|D6R9S4|D6R9S4_HUMAN Cent	A8K8D2	1055800	1224200	917250	863370	1243200	1244200	1313200	1234000	1215500	1263900	1345300	0			20.0099	20.2234	19.807	19.7196	20.2456	20.2468	20.3247	20.2349	20.2131	20.2694	20.3595	A8K8D2	0.317813		A8K8D2	0.256682	20.1294	3.23974	0.00245283	0.033959	-1.80702	tr|A8K8D2|A8K8D2_HUMAN cDNA FLJ77371, highly similar to Homo sapiens MLF1 interacting protein (MLF1IP), mRNA OS=Homo sapiens OX=9606 PE=2 SV=1;sp|Q71F23|CENPU_HUMAN Centromere protein U OS=Homo sapiens OX=9606 GN=CENPU PE=1 SV=1;tr|D6R9S4|D6R9S4_HUMAN Cent				A8K8D2	0.256682	20.1294	0
1597	4184;14834;14835;16087	A0A0S2Z4C5;P04271;A8MRB1	Protein S100-B	S100B	tr|A0A0S2Z4C5|A0A0S2Z4C5_HUMAN Protein S100 (Fragment) OS=Homo sapiens OX=9606 GN=S100B PE=2 SV=1;sp|P04271|S100B_HUMAN Protein S100-B OS=Homo sapiens OX=9606 GN=S100B PE=1 SV=2	A0A0S2Z4C5	1799000	1372500	1233900	1308800	1266200	1419000	2162500	1587500	1897100	1327900	6230800	0			20.7788	20.3884	20.2348	20.3198	20.2721	20.4364	21.0443	20.5983	20.8554	20.3407	22.571	A0A0S2Z4C5	0.224592		A0A0S2Z4C5	0.256264	20.5269	2.64595	0.0116956	0.0628461	-3.22612	tr|A0A0S2Z4C5|A0A0S2Z4C5_HUMAN Protein S100 (Fragment) OS=Homo sapiens OX=9606 GN=S100B PE=2 SV=1;sp|P04271|S100B_HUMAN Protein S100-B OS=Homo sapiens OX=9606 GN=S100B PE=1 SV=2				A0A0S2Z4C5	0.256264	20.5269	0
4578	1292;1433;1460;1511;1512;1908;2245;2387;2442;2503;2570;2646;2980;3417;3906;4286;4596;5304;5688;6474;6692;6780;6904;7053;7054;7183;7222;7223;7224;7249;7340;8261;8321;8829;8921;8922;10028;10835;11624;11983;12589;12746;13502;15599;17010;18087;18756;19547;19566;20354;20724;20727;20732;21720;22859;23366;24108;24966;26809;27178;29051;29381;30104;30734;31240;31590;32772;34253;35891;36873;38181;38860;392…	P21333;Q8TES4;Q6NXF2;Q96C61;B4DTD5;F8WE98;H0Y5C6;Q2VP91;Q86TQ3;H7C2E7	Filamin-A	FLNA;FLJ00119	sp|P21333|FLNA_HUMAN Filamin-A OS=Homo sapiens OX=9606 GN=FLNA PE=1 SV=4;tr|Q8TES4|Q8TES4_HUMAN Epididymis secretory sperm binding protein (Fragment) OS=Homo sapiens OX=9606 GN=FLJ00119 PE=2 SV=1	P21333	654560000	602080000	583300000	539040000	630720000	685790000	736060000	745990000	704980000	715500000	589490000	0			29.2859	29.1654	29.1197	29.0058	29.2324	29.3532	29.4552	29.4746	29.393	29.4144	29.1349	P21333	0.27388		P21333	0.256236	29.29	3.84061	0.000441002	0.0127801	-0.213193	sp|P21333|FLNA_HUMAN Filamin-A OS=Homo sapiens OX=9606 GN=FLNA PE=1 SV=4;tr|Q8TES4|Q8TES4_HUMAN Epididymis secretory sperm binding protein (Fragment) OS=Homo sapiens OX=9606 GN=FLJ00119 PE=2 SV=1				P21333	0.256236	29.29	0
4484	3697;3698;5186;10124;12896;19742;41748;42071;45491;57705;66506;66507	V9HWE9;P09211;A8MX94;C7DJS1;A0A087X2E9;Q5D6A5;A0A2R8Y5E5;B2C310;A0A3B6XSH2	Glutathione S-transferase P	HEL-S-22;GSTP1	tr|V9HWE9|V9HWE9_HUMAN Epididymis secretory protein Li 22 OS=Homo sapiens OX=9606 GN=HEL-S-22 PE=2 SV=1;sp|P09211|GSTP1_HUMAN Glutathione S-transferase P OS=Homo sapiens OX=9606 GN=GSTP1 PE=1 SV=2;tr|A8MX94|A8MX94_HUMAN Glutathione S-transferase P OS=Homo	V9HWE9	163280000	155870000	143290000	127440000	156820000	172650000	189120000	176150000	179320000	171740000	122800000	0			27.2828	27.2158	27.0944	26.9252	27.2245	27.3633	27.4947	27.3922	27.418	27.3557	26.8717	V9HWE9	0.275235		V9HWE9	0.256236	27.2767	3.68341	0.00069846	0.016628	-0.642809	tr|V9HWE9|V9HWE9_HUMAN Epididymis secretory protein Li 22 OS=Homo sapiens OX=9606 GN=HEL-S-22 PE=2 SV=1;sp|P09211|GSTP1_HUMAN Glutathione S-transferase P OS=Homo sapiens OX=9606 GN=GSTP1 PE=1 SV=2;tr|A8MX94|A8MX94_HUMAN Glutathione S-transferase P OS=Homo				V9HWE9	0.256236	27.2767	0
6137	25574;58179	Q96A57;Q5JWB9;A0A087WTT2	Transmembrane protein 230	TMEM230	sp|Q96A57|TM230_HUMAN Transmembrane protein 230 OS=Homo sapiens OX=9606 GN=TMEM230 PE=1 SV=1;tr|Q5JWB9|Q5JWB9_HUMAN Transmembrane protein 230 (Fragment) OS=Homo sapiens OX=9606 GN=TMEM230 PE=1 SV=1;tr|A0A087WTT2|A0A087WTT2_HUMAN Transmembrane protein 230 O	Q96A57	3404800	3299100	2778200	2387800	3251500	3530600	3692800	3747800	3474400	3468200	3644700	0			21.6991	21.6536	21.4057	21.1872	21.6327	21.7515	21.8163	21.8376	21.7283	21.7258	21.7974	Q96A57	0.285455		Q96A57	0.256208	21.6438	3.33473	0.00188512	0.0293533	-1.56437	sp|Q96A57|TM230_HUMAN Transmembrane protein 230 OS=Homo sapiens OX=9606 GN=TMEM230 PE=1 SV=1;tr|Q5JWB9|Q5JWB9_HUMAN Transmembrane protein 230 (Fragment) OS=Homo sapiens OX=9606 GN=TMEM230 PE=1 SV=1;tr|A0A087WTT2|A0A087WTT2_HUMAN Transmembrane protein 230 O				Q96A57	0.256208	21.6438	0
1141	6717;16511;19144;26519;58279;61970;62455	B2R728;A0A024RDQ9;P30825;A0A0A8K9B7;Q5JR49;A0A1W2PR06;P52569	High affinity cationic amino acid transporter 1	SLC7A1	tr|B2R728|B2R728_HUMAN cDNA, FLJ93255, highly similar to Homo sapiens solute carrier family 7 (cationic amino acidtransporter, y+ system), member 1 (SLC7A1), mRNA OS=Homo sapiens OX=9606 PE=2 SV=1;tr|A0A024RDQ9|A0A024RDQ9_HUMAN Solute carrier family 7 (Cat	B2R728	29945000	32947000	26585000	25817000	28362000	32638000	34405000	37241000	34023000	32782000	27638000	0			24.8358	24.9736	24.6641	24.6218	24.7575	24.96	25.0361	25.1504	25.02	24.9664	24.7202	B2R728	0.252749		B2R728	0.256026	24.8986	3.64581	0.000778853	0.0175023	-0.74436	tr|B2R728|B2R728_HUMAN cDNA, FLJ93255, highly similar to Homo sapiens solute carrier family 7 (cationic amino acidtransporter, y+ system), member 1 (SLC7A1), mRNA OS=Homo sapiens OX=9606 PE=2 SV=1;tr|A0A024RDQ9|A0A024RDQ9_HUMAN Solute carrier family 7 (Cat				B2R728	0.256026	24.8986	0
1614	2097;4116;4648;7799;18021;19622;24179;24753;25089;26232;26527;27150;27588;29522;30424;30541;31514;33651;35639;42323;42324;43916;44563;44687;48647;48779;51432;59681;59846;59847;60376;61628;64031;66749	A0A0S2Z4R1;P54577;A0A0C4DGZ5;A0A0S2Z4P3	Tyrosine--tRNA ligase, cytoplasmic;Tyrosine--tRNA ligase, cytoplasmic, N-terminally processed;Tyrosine--tRNA ligase	YARS	tr|A0A0S2Z4R1|A0A0S2Z4R1_HUMAN Tyrosine--tRNA ligase (Fragment) OS=Homo sapiens OX=9606 GN=YARS PE=2 SV=1;sp|P54577|SYYC_HUMAN Tyrosine--tRNA ligase, cytoplasmic OS=Homo sapiens OX=9606 GN=YARS PE=1 SV=4;tr|A0A0C4DGZ5|A0A0C4DGZ5_HUMAN Tyrosine--tRNA ligase	A0A0S2Z4R1	90906000	84456000	80794000	73395000	86672000	94444000	103670000	101600000	98467000	97718000	97797000	0			26.4379	26.3317	26.2677	26.1292	26.3691	26.493	26.6274	26.5983	26.5531	26.5421	26.5433	A0A0S2Z4R1	0.271172		A0A0S2Z4R1	0.255684	26.435	3.79035	0.000511237	0.0140007	-0.351435	tr|A0A0S2Z4R1|A0A0S2Z4R1_HUMAN Tyrosine--tRNA ligase (Fragment) OS=Homo sapiens OX=9606 GN=YARS PE=2 SV=1;sp|P54577|SYYC_HUMAN Tyrosine--tRNA ligase, cytoplasmic OS=Homo sapiens OX=9606 GN=YARS PE=1 SV=4;tr|A0A0C4DGZ5|A0A0C4DGZ5_HUMAN Tyrosine--tRNA ligase				A0A0S2Z4R1	0.255684	26.435	0
4198	37588;50552;52841;58705	Q3B768;O43156	TELO2-interacting protein 1 homolog	KIAA0406;TTI1	tr|Q3B768|Q3B768_HUMAN KIAA0406 protein (Fragment) OS=Homo sapiens OX=9606 GN=KIAA0406 PE=2 SV=1;sp|O43156|TTI1_HUMAN TELO2-interacting protein 1 homolog OS=Homo sapiens OX=9606 GN=TTI1 PE=1 SV=3	Q3B768	1046300	978830	901750	855540	1020800	1050700	1215700	1144800	1077300	1241600	1370400	0			19.9969	19.9007	19.7824	19.7065	19.9613	20.0029	20.2134	20.1267	20.039	20.2438	20.3862	Q3B768	0.278537		Q3B768	0.255604	19.9973	3.63463	0.000804416	0.0177483	-0.774443	tr|Q3B768|Q3B768_HUMAN KIAA0406 protein (Fragment) OS=Homo sapiens OX=9606 GN=KIAA0406 PE=2 SV=1;sp|O43156|TTI1_HUMAN TELO2-interacting protein 1 homolog OS=Homo sapiens OX=9606 GN=TTI1 PE=1 SV=3				Q3B768	0.255604	19.9973	0
6211	1661;22508;46770	Q96H79	Zinc finger CCCH-type antiviral protein 1-like	ZC3HAV1L	sp|Q96H79|ZCCHL_HUMAN Zinc finger CCCH-type antiviral protein 1-like OS=Homo sapiens OX=9606 GN=ZC3HAV1L PE=1 SV=2	Q96H79	838910	763270	699770	655190	765480	867880	893560	895280	887690	884160	811540	0			19.6782	19.5418	19.4165	19.3215	19.546	19.7271	19.7692	19.772	19.7597	19.7539	19.6303	Q96H79	0.266881		Q96H79	0.255582	19.6286	3.74626	0.000581652	0.0151326	-0.472014	sp|Q96H79|ZCCHL_HUMAN Zinc finger CCCH-type antiviral protein 1-like OS=Homo sapiens OX=9606 GN=ZC3HAV1L PE=1 SV=2				Q96H79	0.255582	19.6286	0
6671	11243;13710;26190	Q9NWX6;Q9H8R6;E5RIQ8;B4E366	Probable tRNA(His) guanylyltransferase	THG1L	sp|Q9NWX6|THG1_HUMAN Probable tRNA(His) guanylyltransferase OS=Homo sapiens OX=9606 GN=THG1L PE=1 SV=2;tr|Q9H8R6|Q9H8R6_HUMAN cDNA FLJ13293 fis, clone OVARC1001188 OS=Homo sapiens OX=9606 PE=2 SV=1	Q9NWX6	2170600	1862400	1839100	1707900	2056200	2160800	2432700	2364800	2223500	2289600	2018100	0			21.0497	20.8287	20.8106	20.7038	20.9716	21.0431	21.2141	21.1733	21.0844	21.1267	20.9446	Q9NWX6	0.280135		Q9NWX6	0.255462	21.0006	3.67105	0.000723957	0.0168671	-0.67624	sp|Q9NWX6|THG1_HUMAN Probable tRNA(His) guanylyltransferase OS=Homo sapiens OX=9606 GN=THG1L PE=1 SV=2;tr|Q9H8R6|Q9H8R6_HUMAN cDNA FLJ13293 fis, clone OVARC1001188 OS=Homo sapiens OX=9606 PE=2 SV=1				Q9NWX6	0.255462	21.0006	0
4883	2196;6259;6260;7497;9457;9527;10580;10581;14104;25564;26325;27951;30278;30754;33877;46460;49558;55707;59146;60180;67034	P60709;Q1KLZ0;Q53G76;Q53G99;Q53GK6;Q8WVW5;B4E335;A0A2R8Y793;G5E9R0;E7EVS6;A0A2R8YGF8;Q6PJ43;C9JUM1;B3KWQ3;B7ZAP6;C9JZR7;C9JTX5;V9HVZ7;Q6S8J3;Q96FU6;A5A3E0;Q96DE1;P0CG38;A5GZ75;A4UCT3;A0A2R8YEA7;F1BXA6;L0R5C4;P0CG39;A0A2R8YFE2;Q9UE89;Q562Z7;Q9BYX7;Q562L5;Q562N0;Q562N8;Q562S0;Q562Y6;Q562X9;Q562L6;Q562N4;Q562P9;Q562M3;Q562N2;G8FSY7;Q562M5;Q562Y8;Q562U2;Q562L9;Q562P0;Q562R8;A0AUL6;Q562N6;Q562V5;Q562Z6	Actin, cytoplasmic 1;Actin, cytoplasmic 1, N-terminally processed	ACTB;PS1TP5BP1	sp|P60709|ACTB_HUMAN Actin, cytoplasmic 1 OS=Homo sapiens OX=9606 GN=ACTB PE=1 SV=1;tr|Q1KLZ0|Q1KLZ0_HUMAN HCG15971, isoform CRA_a OS=Homo sapiens OX=9606 GN=PS1TP5BP1 PE=2 SV=1;tr|Q53G76|Q53G76_HUMAN Beta actin variant (Fragment) OS=Homo sapiens OX=9606 P	P60709	4708900	4332800	3512700	3318900	3818400	4255000	5024200	4577100	4833100	4654900	3448100	0			22.167	22.0469	21.7442	21.6623	21.8645	22.0207	22.2605	22.126	22.2045	22.1503	21.7174	P60709	0.247344		P60709	0.255448	22.0247	3.29562	0.00210176	0.0313957	-1.66474	sp|P60709|ACTB_HUMAN Actin, cytoplasmic 1 OS=Homo sapiens OX=9606 GN=ACTB PE=1 SV=1;tr|Q1KLZ0|Q1KLZ0_HUMAN HCG15971, isoform CRA_a OS=Homo sapiens OX=9606 GN=PS1TP5BP1 PE=2 SV=1;tr|Q53G76|Q53G76_HUMAN Beta actin variant (Fragment) OS=Homo sapiens OX=9606 P				P60709	0.255448	22.0247	0
1911	124;13855;19845;26733;45860;52794;55552;65322	A0A1W2PRB8;Q9NVC6;A0A1W2PS27;A0A384NYG5;B4DSE1;E9PM72;A0A1W2PS69;A0A1W2PNW7;A0A1W2PRX4;A0A1W2PQ48;A0A1W2PR99;A0A1W2PPP8;A0A1W2PNF3;E9PKQ4;A8K718;A0A024R396;A0A087WT99;A0A024R3B0;E9PQS1;A0A1W2PQE4;E9PPB5;Q9H0W9;E9PSC3;E9PJU8;E9PIP1;E9PLB3;A0A1W2PPC8;E9PLC5;E9PR95	Mediator of RNA polymerase II transcription subunit 17	MED17	tr|A0A1W2PRB8|A0A1W2PRB8_HUMAN Uncharacterized protein OS=Homo sapiens OX=9606 PE=4 SV=1;sp|Q9NVC6|MED17_HUMAN Mediator of RNA polymerase II transcription subunit 17 OS=Homo sapiens OX=9606 GN=MED17 PE=1 SV=2;tr|A0A1W2PS27|A0A1W2PS27_HUMAN Mediator of RNA	A0A1W2PRB8	1485600	1461300	1412400	1262200	1468100	1663100	1724500	1728100	1712500	1621400	1501300	0			20.5026	20.4788	20.4297	20.2675	20.4855	20.6654	20.7177	20.7207	20.7077	20.6288	20.5178	A0A1W2PRB8	0.268419		A0A1W2PRB8	0.255248	20.5605	3.88223	0.00039001	0.0123228	-0.0981365	tr|A0A1W2PRB8|A0A1W2PRB8_HUMAN Uncharacterized protein OS=Homo sapiens OX=9606 PE=4 SV=1;sp|Q9NVC6|MED17_HUMAN Mediator of RNA polymerase II transcription subunit 17 OS=Homo sapiens OX=9606 GN=MED17 PE=1 SV=2;tr|A0A1W2PS27|A0A1W2PS27_HUMAN Mediator of RNA				A0A1W2PRB8	0.255248	20.5605	0
4058	4024	K7EMI7;Q8IYN6	UBA-like domain-containing protein 2	UBALD2	tr|K7EMI7|K7EMI7_HUMAN UBA-like domain-containing protein 2 OS=Homo sapiens OX=9606 GN=UBALD2 PE=4 SV=1;sp|Q8IYN6|UBAD2_HUMAN UBA-like domain-containing protein 2 OS=Homo sapiens OX=9606 GN=UBALD2 PE=1 SV=1	K7EMI7	719810	624860	598730	548910	653190	726580	808860	755950	708810	742350	632680	0			19.4573	19.2532	19.1915	19.0662	19.3171	19.4708	19.6255	19.5279	19.435	19.5017	19.2711	K7EMI7	0.270152		K7EMI7	0.255134	19.3846	3.62309	0.00083167	0.018285	-0.805474	tr|K7EMI7|K7EMI7_HUMAN UBA-like domain-containing protein 2 OS=Homo sapiens OX=9606 GN=UBALD2 PE=4 SV=1;sp|Q8IYN6|UBAD2_HUMAN UBA-like domain-containing protein 2 OS=Homo sapiens OX=9606 GN=UBALD2 PE=1 SV=1				K7EMI7	0.255134	19.3846	0
1986	36831;67729	E9PP54;B2R8D2;Q0VAN5;A0A2R8YFB7;Q5QJ74	Tubulin-specific chaperone cofactor E-like protein	TBCEL	tr|E9PP54|E9PP54_HUMAN Tubulin-specific chaperone cofactor E-like protein (Fragment) OS=Homo sapiens OX=9606 GN=TBCEL PE=1 SV=1;tr|B2R8D2|B2R8D2_HUMAN cDNA, FLJ93842 OS=Homo sapiens OX=9606 PE=2 SV=1;tr|Q0VAN5|Q0VAN5_HUMAN Tubulin folding cofactor E-like O	E9PP54	125010	123420	107310	101300	127330	125880	177060	124200	127700	146180	121760	0			16.9317	16.9132	16.7114	16.6283	16.9582	16.9417	17.4339	16.9223	16.9624	17.1574	16.8937	E9PP54	0.287384		E9PP54	0.254972	16.956	3.10813	0.00351239	0.039738	-2.13661	tr|E9PP54|E9PP54_HUMAN Tubulin-specific chaperone cofactor E-like protein (Fragment) OS=Homo sapiens OX=9606 GN=TBCEL PE=1 SV=1;tr|B2R8D2|B2R8D2_HUMAN cDNA, FLJ93842 OS=Homo sapiens OX=9606 PE=2 SV=1;tr|Q0VAN5|Q0VAN5_HUMAN Tubulin folding cofactor E-like O				E9PP54	0.254972	16.956	0
1586	12137;34063;44140;55720	O43181;A0A0S2Z433;H0Y9M8	NADH dehydrogenase [ubiquinone] iron-sulfur protein 4, mitochondrial	NDUFS4	sp|O43181|NDUS4_HUMAN NADH dehydrogenase [ubiquinone] iron-sulfur protein 4, mitochondrial OS=Homo sapiens OX=9606 GN=NDUFS4 PE=1 SV=1;tr|A0A0S2Z433|A0A0S2Z433_HUMAN NADH dehydrogenase (Ubiquinone) Fe-S protein 4, 18kDa (NADH-coenzyme Q reductase) (Fragmen	O43181	7835400	7901500	6076700	5741600	8160200	8249600	9241400	8530500	8140700	8055600	8206800	0			22.9016	22.9137	22.5349	22.453	22.9602	22.9759	23.1397	23.0242	22.9567	22.9416	22.9684	O43181	0.306823		O43181	0.254946	22.8801	3.16484	0.00301139	0.0371492	-1.99555	sp|O43181|NDUS4_HUMAN NADH dehydrogenase [ubiquinone] iron-sulfur protein 4, mitochondrial OS=Homo sapiens OX=9606 GN=NDUFS4 PE=1 SV=1;tr|A0A0S2Z433|A0A0S2Z433_HUMAN NADH dehydrogenase (Ubiquinone) Fe-S protein 4, 18kDa (NADH-coenzyme Q reductase) (Fragmen				O43181	0.254946	22.8801	0
1886	6071;8012;25580;29413;34792;53686;67537	P49815;H3BMQ0;A0A1V1FWL6;A0A2R8Y5F1;A0A2R8YGU4;X5D7Q2;X5D2U8;X5D9D6;A0A2R8YDZ2;A0A2R8Y7X5;A0A2R8YDR3;A0A2R8Y7C8;A0A2R8YGD6;A0A1V1FWM5;A0A386NCL5;A0A1V1G0E9;A0A2R8Y6C9;A0A1V1FGH9;A0A1V1FTF4;A0A1V1FI06;A0A1V1FNX9;A0A1V1G0D9;B3KWH7;B3KSR9;X5DP08;X5DRA7;H3BQK4;X5D2X0;X5D7S4;X5D7T9;X5D9F9;A0A2Z3J2W5;A0A2R8Y5B2;X5DP61;A0A1V1FK96;A0A1V1FFQ4;X5D9K3;A0A2R8YGE6;A0A1V1FNX1;A0A2R8YEJ8;X5DRC8;X5D7Z6;I3L3B1	Tuberin	TSC2	sp|P49815|TSC2_HUMAN Tuberin OS=Homo sapiens OX=9606 GN=TSC2 PE=1 SV=2;tr|H3BMQ0|H3BMQ0_HUMAN Tuberin OS=Homo sapiens OX=9606 GN=TSC2 PE=1 SV=1;tr|A0A1V1FWL6|A0A1V1FWL6_HUMAN Tuberin OS=Homo sapiens OX=9606 GN=TSC2 PE=2 SV=1;tr|A0A2R8Y5F1|A0A2R8Y5F1_HUMAN	P49815	1890200	1873700	1642900	1541400	1888400	1955300	2222500	2149000	2164500	2026000	1740400	0			20.8501	20.8375	20.6478	20.5558	20.8487	20.899	21.0837	21.0352	21.0456	20.9502	20.731	P49815	0.27995		P49815	0.254764	20.8754	3.64345	0.000784182	0.0175199	-0.750713	sp|P49815|TSC2_HUMAN Tuberin OS=Homo sapiens OX=9606 GN=TSC2 PE=1 SV=2;tr|H3BMQ0|H3BMQ0_HUMAN Tuberin OS=Homo sapiens OX=9606 GN=TSC2 PE=1 SV=1;tr|A0A1V1FWL6|A0A1V1FWL6_HUMAN Tuberin OS=Homo sapiens OX=9606 GN=TSC2 PE=2 SV=1;tr|A0A2R8Y5F1|A0A2R8Y5F1_HUMAN				P49815	0.254764	20.8754	0
3216	8817;13621;40073;41944;42001;45355;49017;61662;65900	B4DW81;Q9UFN0	Protein NipSnap homolog 3A	NIPSNAP3A	tr|B4DW81|B4DW81_HUMAN cDNA FLJ58863, highly similar to Protein NipSnap3A OS=Homo sapiens OX=9606 PE=2 SV=1;sp|Q9UFN0|NPS3A_HUMAN Protein NipSnap homolog 3A OS=Homo sapiens OX=9606 GN=NIPSNAP3A PE=1 SV=2	B4DW81	5842000	5910800	4761500	4548500	6129300	6281200	6898800	6359400	6386200	6294500	6002000	0			22.478	22.4949	22.183	22.117	22.5473	22.5826	22.7179	22.6005	22.6065	22.5857	22.517	B4DW81	0.300409		B4DW81	0.254596	22.4913	3.394	0.00159692	0.0270221	-1.41103	tr|B4DW81|B4DW81_HUMAN cDNA FLJ58863, highly similar to Protein NipSnap3A OS=Homo sapiens OX=9606 PE=2 SV=1;sp|Q9UFN0|NPS3A_HUMAN Protein NipSnap homolog 3A OS=Homo sapiens OX=9606 GN=NIPSNAP3A PE=1 SV=2				B4DW81	0.254596	22.4913	0
4054	41228;56470	P36954;K7EKS1;K7EK49	DNA-directed RNA polymerase II subunit RPB9	POLR2I	sp|P36954|RPB9_HUMAN DNA-directed RNA polymerase II subunit RPB9 OS=Homo sapiens OX=9606 GN=POLR2I PE=1 SV=1;tr|K7EKS1|K7EKS1_HUMAN DNA-directed RNA polymerase II subunit RPB9 OS=Homo sapiens OX=9606 GN=POLR2I PE=1 SV=1;tr|K7EK49|K7EK49_HUMAN DNA-directed	P36954	687860	694710	665330	594160	734670	754850	897750	811020	839210	726960	676780	0			19.3918	19.4061	19.3437	19.1805	19.4867	19.5258	19.776	19.6294	19.6787	19.4715	19.3683	P36954	0.285767		P36954	0.25452	19.489	3.59551	0.000900423	0.0190781	-0.879408	sp|P36954|RPB9_HUMAN DNA-directed RNA polymerase II subunit RPB9 OS=Homo sapiens OX=9606 GN=POLR2I PE=1 SV=1;tr|K7EKS1|K7EKS1_HUMAN DNA-directed RNA polymerase II subunit RPB9 OS=Homo sapiens OX=9606 GN=POLR2I PE=1 SV=1;tr|K7EK49|K7EK49_HUMAN DNA-directed				P36954	0.25452	19.489	0
2263	8171;34065;46485;58212;60044;61061;64642	A2TJK5;Q5JWS0;H0Y5K5;Q9Y282;A6PVJ3;H0Y621;B4DV36;A6PVJ2;A0A0C4DH46;O95330;A0A1W2PPS8;Q5JWS1;H0Y802;Q5JWS2;H0Y6Z0	Endoplasmic reticulum-Golgi intermediate compartment protein 3	ERGIC3	tr|A2TJK5|A2TJK5_HUMAN ERGIC and golgi 3, isoform CRA_a OS=Homo sapiens OX=9606 GN=ERGIC3 PE=2 SV=1;tr|Q5JWS0|Q5JWS0_HUMAN ERGIC and golgi 3 (Fragment) OS=Homo sapiens OX=9606 GN=ERGIC3 PE=4 SV=1;tr|H0Y5K5|H0Y5K5_HUMAN Endoplasmic reticulum-Golgi intermedi	A2TJK5	875570	773500	726810	742700	890650	1006200	984320	933830	909440	934790	879090	0			19.7399	19.561	19.4712	19.5024	19.7645	19.9405	19.9088	19.8328	19.7946	19.8343	19.7457	A2TJK5	0.293557		A2TJK5	0.254384	19.735	3.67724	0.000711072	0.0166345	-0.659497	tr|A2TJK5|A2TJK5_HUMAN ERGIC and golgi 3, isoform CRA_a OS=Homo sapiens OX=9606 GN=ERGIC3 PE=2 SV=1;tr|Q5JWS0|Q5JWS0_HUMAN ERGIC and golgi 3 (Fragment) OS=Homo sapiens OX=9606 GN=ERGIC3 PE=4 SV=1;tr|H0Y5K5|H0Y5K5_HUMAN Endoplasmic reticulum-Golgi intermedi				A2TJK5	0.254384	19.735	0
6323	4557;18058;30145;33180;33181;42936;60051	Q9BRR6;B4DDP8;B4DG35;H3BRS6;Q69YR1;H3BTH4;H3BN66;H3BU35	ADP-dependent glucokinase	ADPGK	sp|Q9BRR6|ADPGK_HUMAN ADP-dependent glucokinase OS=Homo sapiens OX=9606 GN=ADPGK PE=1 SV=1;tr|B4DDP8|B4DDP8_HUMAN cDNA FLJ55953, highly similar to ADP-dependent glucokinase OS=Homo sapiens OX=9606 PE=2 SV=1;tr|B4DG35|B4DG35_HUMAN cDNA FLJ56905, highly simi	Q9BRR6	3671900	3294400	3049600	2945700	3385500	3847700	4138300	3806100	3957800	3701300	3862800	0			21.8081	21.6516	21.5402	21.4902	21.6909	21.8756	21.9806	21.8599	21.9163	21.8196	21.8812	Q9BRR6	0.267872		Q9BRR6	0.254186	21.7633	3.71516	0.000636885	0.01594	-0.55671	sp|Q9BRR6|ADPGK_HUMAN ADP-dependent glucokinase OS=Homo sapiens OX=9606 GN=ADPGK PE=1 SV=1;tr|B4DDP8|B4DDP8_HUMAN cDNA FLJ55953, highly similar to ADP-dependent glucokinase OS=Homo sapiens OX=9606 PE=2 SV=1;tr|B4DG35|B4DG35_HUMAN cDNA FLJ56905, highly simi				Q9BRR6	0.254186	21.7633	0
3248	53601;58100	B4E038;Q8N8R5	UPF0565 protein C2orf69	C2orf69	tr|B4E038|B4E038_HUMAN cDNA FLJ58443 OS=Homo sapiens OX=9606 PE=2 SV=1;sp|Q8N8R5|CB069_HUMAN UPF0565 protein C2orf69 OS=Homo sapiens OX=9606 GN=C2orf69 PE=1 SV=1	B4E038	242570	224400	228740	216650	271280	311340	234490	264450	328940	277890	197520	0			17.888	17.7757	17.8033	17.725	18.0494	18.2481	17.8392	18.0126	18.3275	18.0842	17.5916	B4E038	0.304285		B4E038	0.254006	17.9753	3.25809	0.00233181	0.0333196	-1.76045	tr|B4E038|B4E038_HUMAN cDNA FLJ58443 OS=Homo sapiens OX=9606 PE=2 SV=1;sp|Q8N8R5|CB069_HUMAN UPF0565 protein C2orf69 OS=Homo sapiens OX=9606 GN=C2orf69 PE=1 SV=1				B4E038	0.254006	17.9753	0
1080	3139;26047;39300;40309;43749;44132;47420;51598;58968;63954;65705;66080	A0A024RCZ8;Q9NSK0;C9J8T5;H7C4M1;C9JZE5;C9JXT5;C9JQU1;C9K0D5;K7EL76;A0A024R0V3;Q6P597;K7ELP9;K7ENJ3	Kinesin light chain 4	KLC4	tr|A0A024RCZ8|A0A024RCZ8_HUMAN Kinesin light chain 4, isoform CRA_a OS=Homo sapiens OX=9606 GN=KLC4 PE=4 SV=1;sp|Q9NSK0|KLC4_HUMAN Kinesin light chain 4 OS=Homo sapiens OX=9606 GN=KLC4 PE=1 SV=3	A0A024RCZ8	3537000	3460000	3004300	2681300	3301500	3564700	3849000	3947800	3817600	3795700	3016000	0			21.7541	21.7223	21.5186	21.3545	21.6547	21.7654	21.876	21.9126	21.8642	21.8559	21.5242	A0A024RCZ8	0.267451		A0A024RCZ8	0.25399	21.7278	3.55132	0.00102215	0.0205218	-0.997317	tr|A0A024RCZ8|A0A024RCZ8_HUMAN Kinesin light chain 4, isoform CRA_a OS=Homo sapiens OX=9606 GN=KLC4 PE=4 SV=1;sp|Q9NSK0|KLC4_HUMAN Kinesin light chain 4 OS=Homo sapiens OX=9606 GN=KLC4 PE=1 SV=3				A0A024RCZ8	0.25399	21.7278	0
4647	14438;18659;27836;33828;42043;45332;49721;63138	Q53Y51;P30046;B4DJQ7;J3KQ18;A0A0F7RPW6;B5MC82;B4E259;A6NHG4;H7C342;A0A0F7RQT4	D-dopachrome decarboxylase;D-dopachrome decarboxylase-like protein	DDT;DDTL	tr|Q53Y51|Q53Y51_HUMAN D-dopachrome tautomerase OS=Homo sapiens OX=9606 GN=DDT PE=2 SV=1;sp|P30046|DOPD_HUMAN D-dopachrome decarboxylase OS=Homo sapiens OX=9606 GN=DDT PE=1 SV=3;tr|B4DJQ7|B4DJQ7_HUMAN cDNA FLJ60602, moderately similar to D-dopachrome decar	Q53Y51	12125000	11930000	10445000	9745800	11445000	12706000	14041000	13133000	12968000	13373000	15962000	0			23.5315	23.5081	23.3163	23.2163	23.4482	23.599	23.7431	23.6467	23.6285	23.6728	23.9281	Q53Y51	0.264965		Q53Y51	0.253934	23.5311	3.68885	0.000687513	0.0164476	-0.628076	tr|Q53Y51|Q53Y51_HUMAN D-dopachrome tautomerase OS=Homo sapiens OX=9606 GN=DDT PE=2 SV=1;sp|P30046|DOPD_HUMAN D-dopachrome decarboxylase OS=Homo sapiens OX=9606 GN=DDT PE=1 SV=3;tr|B4DJQ7|B4DJQ7_HUMAN cDNA FLJ60602, moderately similar to D-dopachrome decar				Q53Y51	0.253934	23.5311	0
2115	5061;6890;6972;28021;30657;45353	A0A384NPU2;P49773;D6REP8;D6RE99;D6RD60;D6RC06;A4D2H4	Histidine triad nucleotide-binding protein 1	HINT1	tr|A0A384NPU2|A0A384NPU2_HUMAN Epididymis secretory sperm binding protein OS=Homo sapiens OX=9606 GN=HINT1 PE=2 SV=1;sp|P49773|HINT1_HUMAN Histidine triad nucleotide-binding protein 1 OS=Homo sapiens OX=9606 GN=HINT1 PE=1 SV=2;tr|D6REP8|D6REP8_HUMAN Histid	A0A384NPU2	19505000	17598000	16530000	15351000	19076000	20644000	21810000	21326000	20614000	20236000	17749000	0			24.2173	24.0689	23.9786	23.8718	24.1853	24.2992	24.3785	24.3461	24.2971	24.2704	24.0812	A0A384NPU2	0.284107		A0A384NPU2	0.253888	24.1913	3.6641	0.00073869	0.0171182	-0.695021	tr|A0A384NPU2|A0A384NPU2_HUMAN Epididymis secretory sperm binding protein OS=Homo sapiens OX=9606 GN=HINT1 PE=2 SV=1;sp|P49773|HINT1_HUMAN Histidine triad nucleotide-binding protein 1 OS=Homo sapiens OX=9606 GN=HINT1 PE=1 SV=2;tr|D6REP8|D6REP8_HUMAN Histid				A0A384NPU2	0.253888	24.1913	0
4241	2534;21385	O43861;K7EII3;B3KSI8	Probable phospholipid-transporting ATPase IIB	ATP9B	sp|O43861|ATP9B_HUMAN Probable phospholipid-transporting ATPase IIB OS=Homo sapiens OX=9606 GN=ATP9B PE=2 SV=4;tr|K7EII3|K7EII3_HUMAN Probable phospholipid-transporting ATPase IIB (Fragment) OS=Homo sapiens OX=9606 GN=ATP9B PE=1 SV=1;tr|B3KSI8|B3KSI8_HUMAN	O43861	1357000	1220400	1138400	1122800	1307400	1417700	1515500	1518300	1453900	1405600	1594500	0			20.372	20.2189	20.1186	20.0987	20.3183	20.4351	20.5314	20.534	20.4715	20.4228	20.6047	O43861	0.276912		O43861	0.253666	20.3521	3.74793	0.000578823	0.015122	-0.46746	sp|O43861|ATP9B_HUMAN Probable phospholipid-transporting ATPase IIB OS=Homo sapiens OX=9606 GN=ATP9B PE=2 SV=4;tr|K7EII3|K7EII3_HUMAN Probable phospholipid-transporting ATPase IIB (Fragment) OS=Homo sapiens OX=9606 GN=ATP9B PE=1 SV=1;tr|B3KSI8|B3KSI8_HUMAN				O43861	0.253666	20.3521	0
4238	18812;19838;21418;21419;22339;22598;32486;33199;46554;50279;51203;51316;51726;53676;59378;60171	O43823;Q8NE02;Q9UG73;B7Z8L8;M0QYL4	A-kinase anchor protein 8	AKAP8;DKFZp586B1222	sp|O43823|AKAP8_HUMAN A-kinase anchor protein 8 OS=Homo sapiens OX=9606 GN=AKAP8 PE=1 SV=1;tr|Q8NE02|Q8NE02_HUMAN AKAP8 protein OS=Homo sapiens OX=9606 GN=AKAP8 PE=2 SV=1;tr|Q9UG73|Q9UG73_HUMAN Uncharacterized protein DKFZp586B1222 (Fragment) OS=Homo sapie	O43823	17233000	16604000	14353000	13175000	16374000	17714000	19601000	18795000	18489000	17675000	18347000	0			24.0387	23.985	23.7749	23.6513	23.9649	24.0784	24.2244	24.1639	24.1402	24.0752	24.129	O43823	0.273944		O43823	0.253456	24.0097	3.53719	0.00106427	0.0209631	-1.03484	sp|O43823|AKAP8_HUMAN A-kinase anchor protein 8 OS=Homo sapiens OX=9606 GN=AKAP8 PE=1 SV=1;tr|Q8NE02|Q8NE02_HUMAN AKAP8 protein OS=Homo sapiens OX=9606 GN=AKAP8 PE=2 SV=1;tr|Q9UG73|Q9UG73_HUMAN Uncharacterized protein DKFZp586B1222 (Fragment) OS=Homo sapie				O43823	0.253456	24.0097	0
6231	1956;4657;6695;10140;12029;14727;14971;28092;32146;42755;43381;46204;47190;54548;56729;57373;58072;61342	Q96JH7;B4DM84	Deubiquitinating protein VCIP135	VCPIP1	sp|Q96JH7|VCIP1_HUMAN Deubiquitinating protein VCIP135 OS=Homo sapiens OX=9606 GN=VCPIP1 PE=1 SV=2;tr|B4DM84|B4DM84_HUMAN cDNA FLJ60694, highly similar to Deubiquitinating protein VCIP135 OS=Homo sapiens OX=9606 PE=2 SV=1	Q96JH7	20391000	18737000	17919000	16146000	18822000	20869000	22710000	22947000	21979000	20941000	20861000	0			24.2814	24.1594	24.095	23.9447	24.1659	24.3149	24.4368	24.4518	24.3896	24.3198	24.3143	Q96JH7	0.262466		Q96JH7	0.253306	24.2559	3.70772	0.000650813	0.0159987	-0.576898	sp|Q96JH7|VCIP1_HUMAN Deubiquitinating protein VCIP135 OS=Homo sapiens OX=9606 GN=VCPIP1 PE=1 SV=2;tr|B4DM84|B4DM84_HUMAN cDNA FLJ60694, highly similar to Deubiquitinating protein VCIP135 OS=Homo sapiens OX=9606 PE=2 SV=1				Q96JH7	0.253306	24.2559	0
1194	3788;5457;14115;15021;20668;28644;31248;35525;38040;49856;61540;64761	A0A087WTA5;Q71US4;Q9Y3W7;Q59FC8;H7C2L8		EIF2B4;DKFZp586J0119	tr|A0A087WTA5|A0A087WTA5_HUMAN Translation initiation factor eIF-2B subunit delta OS=Homo sapiens OX=9606 GN=EIF2B4 PE=1 SV=1;tr|Q71US4|Q71US4_HUMAN eIF-2B-delta-like protein OS=Homo sapiens OX=9606 PE=2 SV=1;tr|Q9Y3W7|Q9Y3W7_HUMAN Uncharacterized protein	A0A087WTA5	1034300	901200	856840	746250	917890	1033300	1092500	1047400	1071600	1038500	978160	0			19.9802	19.7815	19.7087	19.5093	19.808	19.9788	20.0592	19.9984	20.0313	19.9861	19.8997	A0A087WTA5	0.265844		A0A087WTA5	0.253236	19.8841	3.53799	0.00106185	0.0209631	-1.03272	tr|A0A087WTA5|A0A087WTA5_HUMAN Translation initiation factor eIF-2B subunit delta OS=Homo sapiens OX=9606 GN=EIF2B4 PE=1 SV=1;tr|Q71US4|Q71US4_HUMAN eIF-2B-delta-like protein OS=Homo sapiens OX=9606 PE=2 SV=1;tr|Q9Y3W7|Q9Y3W7_HUMAN Uncharacterized protein				A0A087WTA5	0.253236	19.8841	0
5712	51612	Q71RS6	Sodium/potassium/calcium exchanger 5	SLC24A5	sp|Q71RS6|NCKX5_HUMAN Sodium/potassium/calcium exchanger 5 OS=Homo sapiens OX=9606 GN=SLC24A5 PE=1 SV=1	Q71RS6	234440	224590	207340	164220	241280	243920	281600	249170	242500	250510	216760	0			17.8389	17.7769	17.6616	17.3253	17.8803	17.896	18.1033	17.9268	17.8876	17.9345	17.7257	Q71RS6	0.298973		Q71RS6	0.253038	17.8231	3.20115	0.00272703	0.0355481	-1.90446	sp|Q71RS6|NCKX5_HUMAN Sodium/potassium/calcium exchanger 5 OS=Homo sapiens OX=9606 GN=SLC24A5 PE=1 SV=1				Q71RS6	0.253038	17.8231	0
5081	23959;27597;27598;50485;61387	Q0PHS4		G6PD	tr|Q0PHS4|Q0PHS4_HUMAN Glucose-6-phosphate dehydrogenase (Fragment) OS=Homo sapiens OX=9606 GN=G6PD PE=4 SV=1	Q0PHS4	272180	251420	238720	206710	247130	279340	298270	285470	289070	291640	270270	0			18.0542	17.9397	17.865	17.6573	17.9149	18.0917	18.1863	18.123	18.1411	18.1538	18.044	Q0PHS4	0.26012		Q0PHS4	0.252946	18.0127	3.6514	0.000766357	0.0174005	-0.72929	tr|Q0PHS4|Q0PHS4_HUMAN Glucose-6-phosphate dehydrogenase (Fragment) OS=Homo sapiens OX=9606 GN=G6PD PE=4 SV=1				Q0PHS4	0.252946	18.0127	0
3283	22662;29109;55677;63563	B4E2S7;P13473;H0YCG2;B4DF49;B7Z2R9	Lysosome-associated membrane glycoprotein 2	LAMP2	tr|B4E2S7|B4E2S7_HUMAN cDNA FLJ58780, highly similar to Homo sapiens lysosomal-associated membrane protein 2 (LAMP2), transcript variant LAMP2B, mRNA OS=Homo sapiens OX=9606 PE=2 SV=1;sp|P13473|LAMP2_HUMAN Lysosome-associated membrane glycoprotein 2 OS=Hom	B4E2S7	3179500	2660200	2758200	2536700	3062500	3334100	3398400	3445000	3527200	3159000	3714900	0			21.6004	21.3431	21.3953	21.2745	21.5463	21.6689	21.6964	21.7161	21.7501	21.591	21.8249	B4E2S7	0.281175		B4E2S7	0.252584	21.5582	3.64563	0.00077925	0.0175023	-0.744835	tr|B4E2S7|B4E2S7_HUMAN cDNA FLJ58780, highly similar to Homo sapiens lysosomal-associated membrane protein 2 (LAMP2), transcript variant LAMP2B, mRNA OS=Homo sapiens OX=9606 PE=2 SV=1;sp|P13473|LAMP2_HUMAN Lysosome-associated membrane glycoprotein 2 OS=Hom				B4E2S7	0.252584	21.5582	0
3622	5297;19464;20815;43377;59861;66296	E5KNL5;Q14249	Endonuclease G, mitochondrial	ENDOG	tr|E5KNL5|E5KNL5_HUMAN Mitochondrial endonuclease G OS=Homo sapiens OX=9606 PE=4 SV=1;sp|Q14249|NUCG_HUMAN Endonuclease G, mitochondrial OS=Homo sapiens OX=9606 GN=ENDOG PE=1 SV=4	E5KNL5	847300	909530	736540	694280	1017600	1025900	1093800	952180	934880	960660	1033700	0			19.6925	19.7948	19.4904	19.4052	19.9567	19.9685	20.0609	19.8609	19.8344	19.8737	19.9794	E5KNL5	0.323961		E5KNL5	0.251754	19.7938	3.17137	0.0029583	0.0368041	-1.97922	tr|E5KNL5|E5KNL5_HUMAN Mitochondrial endonuclease G OS=Homo sapiens OX=9606 PE=4 SV=1;sp|Q14249|NUCG_HUMAN Endonuclease G, mitochondrial OS=Homo sapiens OX=9606 GN=ENDOG PE=1 SV=4				E5KNL5	0.251754	19.7938	0
1978	6549;20293;37792;60008;62762	A0A2R8YD85;Q96BY6;Q4W4X9;B4DEY4;B4DF07;H0YFC5;Q3LIC8;Q4ZG60	Dedicator of cytokinesis protein 10	DOCK10;DRIP2	tr|A0A2R8YD85|A0A2R8YD85_HUMAN Dedicator of cytokinesis protein 10 OS=Homo sapiens OX=9606 GN=DOCK10 PE=1 SV=1;sp|Q96BY6|DOC10_HUMAN Dedicator of cytokinesis protein 10 OS=Homo sapiens OX=9606 GN=DOCK10 PE=1 SV=3;tr|Q4W4X9|Q4W4X9_HUMAN Dopamine receptor in	A0A2R8YD85	1035800	917330	949480	829100	945520	989090	1123800	1037200	1151200	1274700	986060	0			19.9823	19.8071	19.8568	19.6612	19.8508	19.9157	20.0999	19.9843	20.1347	20.2817	19.9113	A0A2R8YD85	0.256438		A0A2R8YD85	0.251656	19.9575	3.47339	0.00127626	0.0236623	-1.20344	tr|A0A2R8YD85|A0A2R8YD85_HUMAN Dedicator of cytokinesis protein 10 OS=Homo sapiens OX=9606 GN=DOCK10 PE=1 SV=1;sp|Q96BY6|DOC10_HUMAN Dedicator of cytokinesis protein 10 OS=Homo sapiens OX=9606 GN=DOCK10 PE=1 SV=3;tr|Q4W4X9|Q4W4X9_HUMAN Dopamine receptor in				A0A2R8YD85	0.251656	19.9575	0
774	2250;10980;19438;41259;47692;49433	A0A024R8T9;O43760;K7ELD9;K7ENG9;K7ELS8;K7EJ35	Synaptogyrin;Synaptogyrin-2	SYNGR2	tr|A0A024R8T9|A0A024R8T9_HUMAN Synaptogyrin OS=Homo sapiens OX=9606 GN=SYNGR2 PE=3 SV=1;sp|O43760|SNG2_HUMAN Synaptogyrin-2 OS=Homo sapiens OX=9606 GN=SYNGR2 PE=1 SV=1;tr|K7ELD9|K7ELD9_HUMAN Synaptogyrin-2 OS=Homo sapiens OX=9606 GN=SYNGR2 PE=1 SV=1;tr|K7E	A0A024R8T9	15294000	13745000	13771000	12318000	14048000	15635000	17295000	17028000	15902000	16346000	13576000	0			23.8665	23.7124	23.7151	23.5543	23.7439	23.8983	24.0438	24.0214	23.9227	23.9624	23.6946	A0A024R8T9	0.257671		A0A024R8T9	0.251312	23.8441	3.72761	0.000614184	0.0155262	-0.522832	tr|A0A024R8T9|A0A024R8T9_HUMAN Synaptogyrin OS=Homo sapiens OX=9606 GN=SYNGR2 PE=3 SV=1;sp|O43760|SNG2_HUMAN Synaptogyrin-2 OS=Homo sapiens OX=9606 GN=SYNGR2 PE=1 SV=1;tr|K7ELD9|K7ELD9_HUMAN Synaptogyrin-2 OS=Homo sapiens OX=9606 GN=SYNGR2 PE=1 SV=1;tr|K7E				A0A024R8T9	0.251312	23.8441	0
1918	4280;6805;8078;8079;18381;25558;25559;33066;42616;55662;65047;66205	A0A223FKX1;P30453;B1PKZ1;A6H592;Q06FC4;A6H591;A0A0Y0D599;B6ECH4;C5IWY6;A0A1S6Q4B3;P18462;A0A2U3QLJ6;I2HA75;A0A0H3W548;P30457;M4R8T1;A0A1S7SKF3;A0A2P9FIQ0;I7GSC3;A0A0S4XQT7;D9J2K2;A0A2P0W8E3;A0A286LDA8;A0A1W1B6K1;I3ZN79;B7VU66;A0A0S4XR47;A0A0U5Q035;A0A0U5Q1J2;A0A0U5QLN1;A0A1C3PHQ1;Q6R740;A0A1S6Q4B8;I2GUK2;A0A387LBR7;D2KZ34;A0A3S6RI73;Q75NY8;D2KZ28;D2KZ56;A0A2Z4LG68;A0A2U3QLG3;D7RTU8;O02860;A0A2H4W…	HLA class I histocompatibility antigen, A-34 alpha chain;HLA class I histocompatibility antigen, A-25 alpha chain;HLA class I histocompatibility antigen, A-66 alpha chain;HLA class I histocompatibility antigen, A-33 alpha chain;HLA class I histocompatibility antigen, A-31 alpha chain;HLA class I histocompatibility antigen, A-29 alpha chain	HLA-A;HLA;HLA-A*31;HLA-A*33	tr|A0A223FKX1|A0A223FKX1_HUMAN MHC class I antigen OS=Homo sapiens OX=9606 GN=HLA-A PE=3 SV=1;sp|P30453|1A34_HUMAN HLA class I histocompatibility antigen, A-34 alpha chain OS=Homo sapiens OX=9606 GN=HLA-A PE=1 SV=1;tr|B1PKZ1|B1PKZ1_HUMAN MHC class I antige	A0A223FKX1	186510	159130	127030	164360	147790	180620	194330	191560	183350	177420	144190	0			17.5089	17.2798	16.9548	17.3265	17.1732	17.4626	17.5681	17.5474	17.4842	17.4368	17.1376	A0A223FKX1	0.232336		A0A223FKX1	0.2512	17.3742	3.32128	0.00195712	0.0298783	-1.59896	tr|A0A223FKX1|A0A223FKX1_HUMAN MHC class I antigen OS=Homo sapiens OX=9606 GN=HLA-A PE=3 SV=1;sp|P30453|1A34_HUMAN HLA class I histocompatibility antigen, A-34 alpha chain OS=Homo sapiens OX=9606 GN=HLA-A PE=1 SV=1;tr|B1PKZ1|B1PKZ1_HUMAN MHC class I antige				A0A223FKX1	0.2512	17.3742	0
2078	14604;20892;21488	B3KP06;A0A384MTS3;O75815;B4DWK2;B3KNL6	Breast cancer anti-estrogen resistance protein 3	BCAR3	tr|B3KP06|B3KP06_HUMAN cDNA FLJ30880 fis, clone FEBRA2004767, highly similar to Breast cancer anti-estrogen resistance protein 3 OS=Homo sapiens OX=9606 PE=2 SV=1;tr|A0A384MTS3|A0A384MTS3_HUMAN Epididymis secretory sperm binding protein OS=Homo sapiens OX=	B3KP06	94095	80283	79462	64637	82346	77616	114920	97715	99515	87806	115310	0			16.5218	16.2928	16.278	15.9801	16.3294	16.2441	16.8103	16.5763	16.6026	16.422	16.8152	B3KP06	0.262886		B3KP06	0.250638	16.4057	2.93859	0.00552084	0.0464111	-2.54914	tr|B3KP06|B3KP06_HUMAN cDNA FLJ30880 fis, clone FEBRA2004767, highly similar to Breast cancer anti-estrogen resistance protein 3 OS=Homo sapiens OX=9606 PE=2 SV=1;tr|A0A384MTS3|A0A384MTS3_HUMAN Epididymis secretory sperm binding protein OS=Homo sapiens OX=				B3KP06	0.250638	16.4057	0
5663	1478;1479;3231;3241;5185;6254;8940;9172;11032;11533;14294;28504;32473;34385;34969;37644;38178;40502;43904;45196;46106;53822;54707;63214;64321;66671;67013	Q6PK82		AP3D1	tr|Q6PK82|Q6PK82_HUMAN AP3D1 protein (Fragment) OS=Homo sapiens OX=9606 GN=AP3D1 PE=2 SV=1	Q6PK82	574910	515800	491090	484360	589470	559010	774720	613130	609990	611590	319830	0			19.133	18.9764	18.9056	18.8857	19.1691	19.0925	19.5633	19.2258	19.2184	19.2222	18.287	Q6PK82	0.289265		Q6PK82	0.250492	19.1392	3.27456	0.00222803	0.0324909	-1.71851	tr|Q6PK82|Q6PK82_HUMAN AP3D1 protein (Fragment) OS=Homo sapiens OX=9606 GN=AP3D1 PE=2 SV=1				Q6PK82	0.250492	19.1392	0
6868	5077;26777;58097;64848	Q9Y2G3;B4DKX1;B4E3T1;H7C4W6;B3KSJ2;A0A0C4DG94	Probable phospholipid-transporting ATPase IF;Phospholipid-transporting ATPase	ATP11B	sp|Q9Y2G3|AT11B_HUMAN Probable phospholipid-transporting ATPase IF OS=Homo sapiens OX=9606 GN=ATP11B PE=1 SV=2;tr|B4DKX1|B4DKX1_HUMAN cDNA FLJ60651, highly similar to Probable phospholipid-transporting ATPase IF OS=Homo sapiens OX=9606 PE=2 SV=1;tr|B4E3T1|	Q9Y2G3	133630	120350	129330	119450	125690	163560	157300	139880	143650	143820	148480	0			17.0279	16.8769	16.9807	16.8661	16.9395	17.3195	17.2632	17.0938	17.1322	17.1339	17.1799	Q9Y2G3	0.250635		Q9Y2G3	0.250308	17.0634	3.7487	0.00057753	0.015122	-0.465372	sp|Q9Y2G3|AT11B_HUMAN Probable phospholipid-transporting ATPase IF OS=Homo sapiens OX=9606 GN=ATP11B PE=1 SV=2;tr|B4DKX1|B4DKX1_HUMAN cDNA FLJ60651, highly similar to Probable phospholipid-transporting ATPase IF OS=Homo sapiens OX=9606 PE=2 SV=1;tr|B4E3T1|				Q9Y2G3	0.250308	17.0634	0
2444	390;392;4495;4496;7023;13112;21394;22082;22090;22340;22434;32768;36349;43000;54557;57067	A8K4H1;Q8TBR3;Q6IBQ5;H3BPE7;P35637;Q13344;Q59H57;B4DR70;Q70T18;H3BNZ4	RNA-binding protein FUS	FUS	tr|A8K4H1|A8K4H1_HUMAN cDNA FLJ78268, highly similar to Homo sapiens fusion (involved in t(12;16) in malignant liposarcoma), transcript variant 1, mRNA OS=Homo sapiens OX=9606 PE=2 SV=1;tr|Q8TBR3|Q8TBR3_HUMAN Fusion (Involved in t(1216) in malignant liposa	A8K4H1	93151000	82691000	80344000	69287000	76240000	88439000	94566000	103080000	98290000	91759000	101950000	0			26.4731	26.3012	26.2597	26.0461	26.184	26.3982	26.4948	26.6192	26.5505	26.4514	26.6033	A8K4H1	0.232799		A8K4H1	0.249994	26.3778	3.46982	0.00128926	0.023677	-1.21284	tr|A8K4H1|A8K4H1_HUMAN cDNA FLJ78268, highly similar to Homo sapiens fusion (involved in t(12;16) in malignant liposarcoma), transcript variant 1, mRNA OS=Homo sapiens OX=9606 PE=2 SV=1;tr|Q8TBR3|Q8TBR3_HUMAN Fusion (Involved in t(1216) in malignant liposa				A8K4H1	0.249994	26.3778	0
4555	567;32200;32915;62242	P17676;Q99557;Q9BSC0;W8SNV5;W8SNU6	CCAAT/enhancer-binding protein beta	CEBPB	sp|P17676|CEBPB_HUMAN CCAAT/enhancer-binding protein beta OS=Homo sapiens OX=9606 GN=CEBPB PE=1 SV=2;tr|Q99557|Q99557_HUMAN NF-IL6 (Fragment) OS=Homo sapiens OX=9606 PE=2 SV=1;tr|Q9BSC0|Q9BSC0_HUMAN CEBPB protein (Fragment) OS=Homo sapiens OX=9606 GN=CEBPB	P17676	4429400	4686900	3775300	3540700	4039400	4437800	4774100	5158300	4990800	4887000	4326900	0			22.0787	22.1602	21.8482	21.7556	21.9457	22.0814	22.1868	22.2985	22.2508	22.2205	22.0449	P17676	0.246946		P17676	0.249936	22.0826	3.44378	0.00138791	0.0249744	-1.28117	sp|P17676|CEBPB_HUMAN CCAAT/enhancer-binding protein beta OS=Homo sapiens OX=9606 GN=CEBPB PE=1 SV=2;tr|Q99557|Q99557_HUMAN NF-IL6 (Fragment) OS=Homo sapiens OX=9606 PE=2 SV=1;tr|Q9BSC0|Q9BSC0_HUMAN CEBPB protein (Fragment) OS=Homo sapiens OX=9606 GN=CEBPB				P17676	0.249936	22.0826	0
1008	38396;46552	A0A0B4J2E8;A0A024RBT3;Q96D31	Calcium release-activated calcium channel protein 1	ORAI1;FLJ14466	tr|A0A0B4J2E8|A0A0B4J2E8_HUMAN Calcium release-activated calcium channel protein 1 OS=Homo sapiens OX=9606 GN=ORAI1 PE=1 SV=1;tr|A0A024RBT3|A0A024RBT3_HUMAN Uncharacterized protein OS=Homo sapiens OX=9606 GN=FLJ14466 PE=4 SV=1;sp|Q96D31|CRCM1_HUMAN Calcium	A0A0B4J2E8	669010	597700	485650	449040	643960	708830	782040	614090	614530	638200	632740	0			19.3517	19.1891	18.8896	18.7765	19.2966	19.4351	19.5769	19.2281	19.2291	19.2837	19.2712	A0A0B4J2E8	0.298872		A0A0B4J2E8	0.249888	19.2256	2.88717	0.00631708	0.0493048	-2.67141	tr|A0A0B4J2E8|A0A0B4J2E8_HUMAN Calcium release-activated calcium channel protein 1 OS=Homo sapiens OX=9606 GN=ORAI1 PE=1 SV=1;tr|A0A024RBT3|A0A024RBT3_HUMAN Uncharacterized protein OS=Homo sapiens OX=9606 GN=FLJ14466 PE=4 SV=1;sp|Q96D31|CRCM1_HUMAN Calcium				A0A0B4J2E8	0.249888	19.2256	0
6697	26744;30493;34610;35575;44574;46017	Q9NYB0	Telomeric repeat-binding factor 2-interacting protein 1	TERF2IP	sp|Q9NYB0|TE2IP_HUMAN Telomeric repeat-binding factor 2-interacting protein 1 OS=Homo sapiens OX=9606 GN=TERF2IP PE=1 SV=1	Q9NYB0	1361700	1196600	1192200	1152000	1296300	1456200	1595900	1401600	1423400	1486400	1600800	0			20.377	20.1905	20.1852	20.1357	20.306	20.4738	20.6059	20.4186	20.4409	20.5034	20.6104	Q9NYB0	0.266434		Q9NYB0	0.24966	20.3637	3.72117	0.000625828	0.0157567	-0.540363	sp|Q9NYB0|TE2IP_HUMAN Telomeric repeat-binding factor 2-interacting protein 1 OS=Homo sapiens OX=9606 GN=TERF2IP PE=1 SV=1				Q9NYB0	0.24966	20.3637	0
3367	41180;53026;53426;53777;61031	B7Z7F2;B7ZAT4;B7Z7Q4;Q8WZA1	Protein O-linked-mannose beta-1,2-N-acetylglucosaminyltransferase 1	POMGNT1	tr|B7Z7F2|B7Z7F2_HUMAN cDNA FLJ53518, highly similar to Protein O-linked-mannosebeta-1,2-N-acetylglucosaminyltransferase 1 OS=Homo sapiens OX=9606 PE=2 SV=1;tr|B7ZAT4|B7ZAT4_HUMAN cDNA, FLJ79298, highly similar to Protein O-linked-mannosebeta-1,2-N-acetylg	B7Z7F2	387230	423310	277270	243010	430750	380000	469570	394970	410310	389730	825020	0			18.5628	18.6913	18.0809	17.8907	18.7165	18.5356	18.841	18.5914	18.6464	18.5721	19.6541	B7Z7F2	0.330849		B7Z7F2	0.24884	18.5129	2.44474	0.0191309	0.076713	-3.66322	tr|B7Z7F2|B7Z7F2_HUMAN cDNA FLJ53518, highly similar to Protein O-linked-mannosebeta-1,2-N-acetylglucosaminyltransferase 1 OS=Homo sapiens OX=9606 PE=2 SV=1;tr|B7ZAT4|B7ZAT4_HUMAN cDNA, FLJ79298, highly similar to Protein O-linked-mannosebeta-1,2-N-acetylg				B7Z7F2	0.24884	18.5129	0
3982	5598;27710;36515;42062;45475	I4AY87;P14174	Macrophage migration inhibitory factor	MIF	tr|I4AY87|I4AY87_HUMAN Epididymis secretory sperm binding protein (Fragment) OS=Homo sapiens OX=9606 GN=MIF PE=1 SV=1;sp|P14174|MIF_HUMAN Macrophage migration inhibitory factor OS=Homo sapiens OX=9606 GN=MIF PE=1 SV=4	I4AY87	11901000	12032000	10710000	9975700	12167000	12839000	14604000	13329000	13307000	13243000	13012000	0			23.5046	23.5204	23.3525	23.25	23.5365	23.614	23.7999	23.6681	23.6657	23.6587	23.6333	I4AY87	0.274424		I4AY87	0.2485	23.557	3.6136	0.000854731	0.0185956	-0.830938	tr|I4AY87|I4AY87_HUMAN Epididymis secretory sperm binding protein (Fragment) OS=Homo sapiens OX=9606 GN=MIF PE=1 SV=1;sp|P14174|MIF_HUMAN Macrophage migration inhibitory factor OS=Homo sapiens OX=9606 GN=MIF PE=1 SV=4				I4AY87	0.2485	23.557	0
5192	8865;18905;21884;23881;25553;37322;41907;44188;51667;52654;60876;63950;65811	Q14554;C9JY10;H7C4F9	Protein disulfide-isomerase A5	PDIA5	sp|Q14554|PDIA5_HUMAN Protein disulfide-isomerase A5 OS=Homo sapiens OX=9606 GN=PDIA5 PE=1 SV=1	Q14554	17373000	15871000	15312000	14934000	17199000	18590000	18919000	19498000	19027000	19663000	19768000	0			24.0503	23.9199	23.8682	23.8321	24.0358	24.148	24.1733	24.2168	24.1816	24.229	24.2367	Q14554	0.272118		Q14554	0.248478	24.0655	3.78174	0.000524295	0.0140502	-0.375012	sp|Q14554|PDIA5_HUMAN Protein disulfide-isomerase A5 OS=Homo sapiens OX=9606 GN=PDIA5 PE=1 SV=1				Q14554	0.248478	24.0655	0
391	10048;12537;16895;58344	A0A024R407;A0A024R3Z1;P11137;A8K5Y1;A0A024R409;Q59FX9;A0A024R3Y8;Q6NYC5;A8MZ31;E7EV03;H7BZB9	Microtubule-associated protein;Microtubule-associated protein 2	MAP2	tr|A0A024R407|A0A024R407_HUMAN Microtubule-associated protein OS=Homo sapiens OX=9606 GN=MAP2 PE=4 SV=1;tr|A0A024R3Z1|A0A024R3Z1_HUMAN Microtubule-associated protein OS=Homo sapiens OX=9606 GN=MAP2 PE=4 SV=1;sp|P11137|MTAP2_HUMAN Microtubule-associated pro	A0A024R407	2117800	2022100	2090300	1982100	2325300	2437700	2785100	2536600	2474200	2287600	2696200	0			21.0141	20.9474	20.9953	20.9186	21.149	21.2171	21.4093	21.2745	21.2385	21.1254	21.3625	A0A024R407	0.284096		A0A024R407	0.248072	21.1289	3.64157	0.00078845	0.0175199	-0.755769	tr|A0A024R407|A0A024R407_HUMAN Microtubule-associated protein OS=Homo sapiens OX=9606 GN=MAP2 PE=4 SV=1;tr|A0A024R3Z1|A0A024R3Z1_HUMAN Microtubule-associated protein OS=Homo sapiens OX=9606 GN=MAP2 PE=4 SV=1;sp|P11137|MTAP2_HUMAN Microtubule-associated pro				A0A024R407	0.248072	21.1289	0
6113	2153;20383	Q92968	Peroxisomal membrane protein PEX13	PEX13	sp|Q92968|PEX13_HUMAN Peroxisomal membrane protein PEX13 OS=Homo sapiens OX=9606 GN=PEX13 PE=1 SV=2	Q92968	1991700	1927400	1880500	1720600	2039300	2520500	2350700	2291100	2104300	2093900	1906800	0			20.9256	20.8782	20.8427	20.7145	20.9596	21.2653	21.1647	21.1276	21.0049	20.9978	20.8627	Q92968	0.271802		Q92968	0.247922	20.9881	3.5895	0.000916112	0.0191587	-0.895479	sp|Q92968|PEX13_HUMAN Peroxisomal membrane protein PEX13 OS=Homo sapiens OX=9606 GN=PEX13 PE=1 SV=2				Q92968	0.247922	20.9881	0
4112	21057;46332;48516;50840;55876;59244;59911;61946;64256;64844	V9HW92;O00151	PDZ and LIM domain protein 1	HEL-S-112;PDLIM1	tr|V9HW92|V9HW92_HUMAN Epididymis secretory protein Li 112 OS=Homo sapiens OX=9606 GN=HEL-S-112 PE=2 SV=1;sp|O00151|PDLI1_HUMAN PDZ and LIM domain protein 1 OS=Homo sapiens OX=9606 GN=PDLIM1 PE=1 SV=4	V9HW92	6260000	5613400	5404300	4967800	5678500	6241600	6866100	6808400	6466100	6696900	5773100	0			22.5777	22.4204	22.3657	22.2442	22.4371	22.5735	22.7111	22.6989	22.6245	22.6751	22.4609	V9HW92	0.254583		V9HW92	0.247568	22.5328	3.64586	0.000778727	0.0175023	-0.744209	tr|V9HW92|V9HW92_HUMAN Epididymis secretory protein Li 112 OS=Homo sapiens OX=9606 GN=HEL-S-112 PE=2 SV=1;sp|O00151|PDLI1_HUMAN PDZ and LIM domain protein 1 OS=Homo sapiens OX=9606 GN=PDLIM1 PE=1 SV=4				V9HW92	0.247568	22.5328	0
3324	12448;22071;28014;34817;38421;45922;48807;49541;54468;54967;61783;61784;61901;65064	B7Z2R7;Q5T8D3;B7Z9D0;Q8NCM9;B7Z2A7;X6RDD7;Q5T8E0;A0A087X0B8	Acyl-CoA-binding domain-containing protein 5	ACBD5;KIAA1996	tr|B7Z2R7|B7Z2R7_HUMAN Acyl-CoA-binding domain-containing protein 5 OS=Homo sapiens OX=9606 GN=ACBD5 PE=1 SV=1;sp|Q5T8D3|ACBD5_HUMAN Acyl-CoA-binding domain-containing protein 5 OS=Homo sapiens OX=9606 GN=ACBD5 PE=1 SV=1;tr|B7Z9D0|B7Z9D0_HUMAN cDNA FLJ5709	B7Z2R7	20856000	21982000	18338000	18056000	21977000	25243000	25465000	23556000	21885000	23729000	20779000	0			24.314	24.3898	24.1283	24.106	24.3895	24.5894	24.602	24.4896	24.3834	24.5002	24.3086	B7Z2R7	0.278394		B7Z2R7	0.2474	24.3892	3.50091	0.00118029	0.0224329	-1.13092	tr|B7Z2R7|B7Z2R7_HUMAN Acyl-CoA-binding domain-containing protein 5 OS=Homo sapiens OX=9606 GN=ACBD5 PE=1 SV=1;sp|Q5T8D3|ACBD5_HUMAN Acyl-CoA-binding domain-containing protein 5 OS=Homo sapiens OX=9606 GN=ACBD5 PE=1 SV=1;tr|B7Z9D0|B7Z9D0_HUMAN cDNA FLJ5709				B7Z2R7	0.2474	24.3892	0
4002	7516;45956;51886;57687;58058	Q6IRX3;J3KPD3;Q9Y580;G3V1T9;I3L521;F5GXV8;Q59EQ8;F5GY08;F5H674;F5H606	RNA-binding protein 7	RBM7	tr|Q6IRX3|Q6IRX3_HUMAN RNA binding motif protein 7 OS=Homo sapiens OX=9606 GN=RBM7 PE=2 SV=1;tr|J3KPD3|J3KPD3_HUMAN RNA binding motif protein 7, isoform CRA_c OS=Homo sapiens OX=9606 GN=RBM7 PE=1 SV=1;sp|Q9Y580|RBM7_HUMAN RNA-binding protein 7 OS=Homo sapi	Q6IRX3	2240600	2090800	1861300	1752300	2230100	2344100	2495200	2425800	2421300	2336800	2376500	0			21.0954	20.9956	20.8279	20.7408	21.0887	21.1606	21.2507	21.21	21.2074	21.1561	21.1804	Q6IRX3	0.282017		Q6IRX3	0.24727	21.0733	3.50412	0.00116954	0.0223321	-1.12242	tr|Q6IRX3|Q6IRX3_HUMAN RNA binding motif protein 7 OS=Homo sapiens OX=9606 GN=RBM7 PE=2 SV=1;tr|J3KPD3|J3KPD3_HUMAN RNA binding motif protein 7, isoform CRA_c OS=Homo sapiens OX=9606 GN=RBM7 PE=1 SV=1;sp|Q9Y580|RBM7_HUMAN RNA-binding protein 7 OS=Homo sapi				Q6IRX3	0.24727	21.0733	0
4624	11402;12450;13635;20962;20963;22972;26955;31197;31198;32095;34269;37954;42712;46639;58953;65068	Q5TZP7;P27695;G3V5Q1;G3V3M6;A0A0C4DGK8;G3V3C7;G3V5D9;G3V5M0;G3V359;H7C4A8;G3V3Y6;G3V2D9;A0A2S1WCK0	DNA-(apurinic or apyrimidinic site) lyase;DNA-(apurinic or apyrimidinic site) lyase, mitochondrial	APEX1	tr|Q5TZP7|Q5TZP7_HUMAN DNA-(apurinic or apyrimidinic site) lyase OS=Homo sapiens OX=9606 GN=APEX1 PE=2 SV=1;sp|P27695|APEX1_HUMAN DNA-(apurinic or apyrimidinic site) lyase OS=Homo sapiens OX=9606 GN=APEX1 PE=1 SV=2;tr|G3V5Q1|G3V5Q1_HUMAN DNA-(apurinic or a	Q5TZP7	31868000	27654000	27351000	25815000	29685000	32722000	35256000	33810000	34482000	32345000	29771000	0			24.9256	24.721	24.7051	24.6217	24.8232	24.9638	25.0714	25.011	25.0393	24.947	24.8274	Q5TZP7	0.263142		Q5TZP7	0.247166	24.8829	3.66339	0.000740217	0.0171182	-0.696946	tr|Q5TZP7|Q5TZP7_HUMAN DNA-(apurinic or apyrimidinic site) lyase OS=Homo sapiens OX=9606 GN=APEX1 PE=2 SV=1;sp|P27695|APEX1_HUMAN DNA-(apurinic or apyrimidinic site) lyase OS=Homo sapiens OX=9606 GN=APEX1 PE=1 SV=2;tr|G3V5Q1|G3V5Q1_HUMAN DNA-(apurinic or a				Q5TZP7	0.247166	24.8829	0
5364	29353;29389;54993;62684	Q53EY9;Q8NEZ5;H3BTH6;H3BRE0;B4DFX7;H3BVA4;H3BUC1	F-box only protein 22	FBXO22	tr|Q53EY9|Q53EY9_HUMAN F-box only protein 22 isoform a variant (Fragment) OS=Homo sapiens OX=9606 PE=2 SV=1;sp|Q8NEZ5|FBX22_HUMAN F-box only protein 22 OS=Homo sapiens OX=9606 GN=FBXO22 PE=1 SV=1;tr|H3BTH6|H3BTH6_HUMAN F-box only protein 22 (Fragment) OS=H	Q53EY9	363460	346040	338010	296900	402110	422080	436340	416470	401860	387590	327000	0			18.4714	18.4006	18.3667	18.1796	18.6172	18.6872	18.7351	18.6679	18.6163	18.5642	18.3189	Q53EY9	0.299532		Q53EY9	0.247004	18.5306	3.45855	0.00133109	0.0241608	-1.24243	tr|Q53EY9|Q53EY9_HUMAN F-box only protein 22 isoform a variant (Fragment) OS=Homo sapiens OX=9606 PE=2 SV=1;sp|Q8NEZ5|FBX22_HUMAN F-box only protein 22 OS=Homo sapiens OX=9606 GN=FBXO22 PE=1 SV=1;tr|H3BTH6|H3BTH6_HUMAN F-box only protein 22 (Fragment) OS=H				Q53EY9	0.247004	18.5306	0
766	2546;2579;2967;7930;21022;24920;34249;45430;48183;49235;59230;64289;66863	A0A024R8Q1;P10253;I3L0S5;I3L3L3;I3L2V9	Lysosomal alpha-glucosidase;76 kDa lysosomal alpha-glucosidase;70 kDa lysosomal alpha-glucosidase	GAA	tr|A0A024R8Q1|A0A024R8Q1_HUMAN Glucosidase, alpha acid (Pompe disease, glycogen storage disease type II), isoform CRA_a OS=Homo sapiens OX=9606 GN=GAA PE=3 SV=1;sp|P10253|LYAG_HUMAN Lysosomal alpha-glucosidase OS=Homo sapiens OX=9606 GN=GAA PE=1 SV=4	A0A024R8Q1	17611000	16297000	15023000	13864000	16279000	17749000	18990000	19285000	19082000	18464000	17371000	0			24.07	23.9581	23.8407	23.7248	23.9565	24.0812	24.1787	24.201	24.1857	24.1382	24.0502	A0A024R8Q1	0.258579		A0A024R8Q1	0.246956	24.0335	3.60873	0.000866804	0.0187278	-0.843994	tr|A0A024R8Q1|A0A024R8Q1_HUMAN Glucosidase, alpha acid (Pompe disease, glycogen storage disease type II), isoform CRA_a OS=Homo sapiens OX=9606 GN=GAA PE=3 SV=1;sp|P10253|LYAG_HUMAN Lysosomal alpha-glucosidase OS=Homo sapiens OX=9606 GN=GAA PE=1 SV=4				A0A024R8Q1	0.246956	24.0335	0
5936	19390;43818	Q8N5L8	Ribonuclease P protein subunit p25-like protein	RPP25L	sp|Q8N5L8|RP25L_HUMAN Ribonuclease P protein subunit p25-like protein OS=Homo sapiens OX=9606 GN=RPP25L PE=1 SV=1	Q8N5L8	201030	196080	180420	149100	191670	212290	217970	203670	234190	216710	194750	0			17.617	17.5811	17.461	17.1859	17.5483	17.6957	17.7338	17.6359	17.8373	17.7254	17.5713	Q8N5L8	0.264347		Q8N5L8	0.246946	17.6021	3.38049	0.00165864	0.0274709	-1.4461	sp|Q8N5L8|RP25L_HUMAN Ribonuclease P protein subunit p25-like protein OS=Homo sapiens OX=9606 GN=RPP25L PE=1 SV=1				Q8N5L8	0.246946	17.6021	0
1508	17554;22347	A0A0D9SG79;Q9NZ09	Ubiquitin-associated protein 1	UBAP1	tr|A0A0D9SG79|A0A0D9SG79_HUMAN Ubiquitin-associated protein 1 (Fragment) OS=Homo sapiens OX=9606 GN=UBAP1 PE=1 SV=1;sp|Q9NZ09|UBAP1_HUMAN Ubiquitin-associated protein 1 OS=Homo sapiens OX=9606 GN=UBAP1 PE=1 SV=1	A0A0D9SG79	492670	454330	467710	434400	473350	554910	547740	552880	544530	552770	468940	0			18.9103	18.7934	18.8352	18.7287	18.8526	19.0819	19.0631	19.0766	19.0546	19.0763	18.839	A0A0D9SG79	0.253632		A0A0D9SG79	0.2465	18.9473	3.86369	0.000411972	0.0125375	-0.149446	tr|A0A0D9SG79|A0A0D9SG79_HUMAN Ubiquitin-associated protein 1 (Fragment) OS=Homo sapiens OX=9606 GN=UBAP1 PE=1 SV=1;sp|Q9NZ09|UBAP1_HUMAN Ubiquitin-associated protein 1 OS=Homo sapiens OX=9606 GN=UBAP1 PE=1 SV=1				A0A0D9SG79	0.2465	18.9473	0
5790	1;5977;15097;15376;21736;36323;47661;58220;58877;59209;63683;64175	Q86U42;G3V4T2;B4DEH8;H0YJH9;B6RF28;A6NDY0	Polyadenylate-binding protein 2	PABPN1	sp|Q86U42|PABP2_HUMAN Polyadenylate-binding protein 2 OS=Homo sapiens OX=9606 GN=PABPN1 PE=1 SV=3;tr|G3V4T2|G3V4T2_HUMAN Polyadenylate-binding protein 2 OS=Homo sapiens OX=9606 GN=PABPN1 PE=1 SV=1;tr|B4DEH8|B4DEH8_HUMAN Polyadenylate-binding protein 2 OS=H	Q86U42	12763000	14803000	11240000	9914600	11230000	12550000	14698000	15191000	14529000	13642000	11842000	0			23.6055	23.8194	23.4221	23.2411	23.4209	23.5812	23.8091	23.8567	23.7924	23.7016	23.4974	Q86U42	0.22617		Q86U42	0.246406	23.625	3.09357	0.00365319	0.0402545	-2.17258	sp|Q86U42|PABP2_HUMAN Polyadenylate-binding protein 2 OS=Homo sapiens OX=9606 GN=PABPN1 PE=1 SV=3;tr|G3V4T2|G3V4T2_HUMAN Polyadenylate-binding protein 2 OS=Homo sapiens OX=9606 GN=PABPN1 PE=1 SV=1;tr|B4DEH8|B4DEH8_HUMAN Polyadenylate-binding protein 2 OS=H				Q86U42	0.246406	23.625	0
4373	17959;23122;57341;57843	O95168;F2Z3P9;C9JXQ9	NADH dehydrogenase [ubiquinone] 1 beta subcomplex subunit 4	NDUFB4	sp|O95168|NDUB4_HUMAN NADH dehydrogenase [ubiquinone] 1 beta subcomplex subunit 4 OS=Homo sapiens OX=9606 GN=NDUFB4 PE=1 SV=3;tr|F2Z3P9|F2Z3P9_HUMAN NADH dehydrogenase [ubiquinone] 1 beta subcomplex subunit 4 OS=Homo sapiens OX=9606 GN=NDUFB4 PE=1 SV=1;tr|	O95168	4995800	5004900	3587300	3321000	4899900	4761100	5300900	5281800	5156100	4987600	5304800	0			22.2523	22.2549	21.7745	21.6632	22.2243	22.1829	22.3378	22.3326	22.2979	22.2499	22.3389	O95168	0.293991		O95168	0.24637	22.157	2.841	0.00712243	0.0508448	-2.78005	sp|O95168|NDUB4_HUMAN NADH dehydrogenase [ubiquinone] 1 beta subcomplex subunit 4 OS=Homo sapiens OX=9606 GN=NDUFB4 PE=1 SV=3;tr|F2Z3P9|F2Z3P9_HUMAN NADH dehydrogenase [ubiquinone] 1 beta subcomplex subunit 4 OS=Homo sapiens OX=9606 GN=NDUFB4 PE=1 SV=1;tr|				O95168	0.24637	22.157	0
203	60463;60988	A0A087WWW8;A0A024R1E5;Q9Y6J0;Q9NPU0;B5MEB3;Q8WTX5	Calcineurin-binding protein cabin-1	CABIN1;DKFZp762G2015	tr|A0A087WWW8|A0A087WWW8_HUMAN Calcineurin-binding protein cabin-1 OS=Homo sapiens OX=9606 GN=CABIN1 PE=1 SV=1;tr|A0A024R1E5|A0A024R1E5_HUMAN Calcineurin binding protein 1, isoform CRA_a OS=Homo sapiens OX=9606 GN=CABIN1 PE=4 SV=1;sp|Q9Y6J0|CABIN_HUMAN Cal	A0A087WWW8	8829	9386.8	8757.3	8490.4	13328	12264	13525	11815	10117	9726.6	8666.1	0			13.108	13.1964	13.0963	13.0516	13.7022	13.5821	13.7233	13.5283	13.3045	13.2477	13.0812	A0A087WWW8	0.364119		A0A087WWW8	0.246302	13.3541	2.67832	0.010785	0.0605591	-3.15357	tr|A0A087WWW8|A0A087WWW8_HUMAN Calcineurin-binding protein cabin-1 OS=Homo sapiens OX=9606 GN=CABIN1 PE=1 SV=1;tr|A0A024R1E5|A0A024R1E5_HUMAN Calcineurin binding protein 1, isoform CRA_a OS=Homo sapiens OX=9606 GN=CABIN1 PE=4 SV=1;sp|Q9Y6J0|CABIN_HUMAN Cal				A0A087WWW8	0.246302	13.3541	0
5013	9450;14573;15523;16104;19752;20214;25851;26820;38000;39538;41400;44341;51657;51658;59047;63228	Q02127;I3NI32;J3QRQ3;I3L449;J3QRJ4	Dihydroorotate dehydrogenase (quinone), mitochondrial	DHODH	sp|Q02127|PYRD_HUMAN Dihydroorotate dehydrogenase (quinone), mitochondrial OS=Homo sapiens OX=9606 GN=DHODH PE=1 SV=3;tr|I3NI32|I3NI32_HUMAN Dihydroorotate dehydrogenase (quinone), mitochondrial OS=Homo sapiens OX=9606 GN=DHODH PE=1 SV=1	Q02127	8880400	8809200	7460300	7171700	9035600	9908500	10145000	9820000	9542000	9422900	9751700	0			23.0822	23.0706	22.8308	22.7739	23.1072	23.2402	23.2743	23.2273	23.1859	23.1677	23.2172	Q02127	0.279715		Q02127	0.24615	23.096	3.4907	0.00121507	0.0227153	-1.15787	sp|Q02127|PYRD_HUMAN Dihydroorotate dehydrogenase (quinone), mitochondrial OS=Homo sapiens OX=9606 GN=DHODH PE=1 SV=3;tr|I3NI32|I3NI32_HUMAN Dihydroorotate dehydrogenase (quinone), mitochondrial OS=Homo sapiens OX=9606 GN=DHODH PE=1 SV=1				Q02127	0.24615	23.096	0
2006	12378;14536;31935;33311;33671;39059;40282;47156;53337;53932;58316	A0A2X0SFX7;Q9Y3L3;B7Z6Y3;Q3ZTT7;Q6ZTJ5;A0A3B3IU28;A0A2R8Y5V0;F8WEQ3	SH3 domain-binding protein 1	SH3BP1	tr|A0A2X0SFX7|A0A2X0SFX7_HUMAN SH3-domain binding protein 1, isoform CRA_d (Fragment) OS=Homo sapiens OX=9606 GN=SH3BP1 PE=4 SV=1;sp|Q9Y3L3|3BP1_HUMAN SH3 domain-binding protein 1 OS=Homo sapiens OX=9606 GN=SH3BP1 PE=1 SV=3;tr|B7Z6Y3|B7Z6Y3_HUMAN cDNA FLJ6	A0A2X0SFX7	9988900	8852600	8327600	8048700	9132200	9607900	11044000	10746000	10564000	10545000	10275000	0			23.2519	23.0777	22.9895	22.9403	23.1225	23.1958	23.3968	23.3573	23.3327	23.3301	23.2926	A0A2X0SFX7	0.257675		A0A2X0SFX7	0.246136	23.1994	3.58316	0.000932948	0.0193532	-0.91242	tr|A0A2X0SFX7|A0A2X0SFX7_HUMAN SH3-domain binding protein 1, isoform CRA_d (Fragment) OS=Homo sapiens OX=9606 GN=SH3BP1 PE=4 SV=1;sp|Q9Y3L3|3BP1_HUMAN SH3 domain-binding protein 1 OS=Homo sapiens OX=9606 GN=SH3BP1 PE=1 SV=3;tr|B7Z6Y3|B7Z6Y3_HUMAN cDNA FLJ6				A0A2X0SFX7	0.246136	23.1994	0
6961	1279;6443;6543;14686;34812;62735	Q9Y6G5;D6RJ90;H0Y9N4;D6RC04	COMM domain-containing protein 10	COMMD10	sp|Q9Y6G5|COMDA_HUMAN COMM domain-containing protein 10 OS=Homo sapiens OX=9606 GN=COMMD10 PE=1 SV=1;tr|D6RJ90|D6RJ90_HUMAN COMM domain containing 10, isoform CRA_b OS=Homo sapiens OX=9606 GN=COMMD10 PE=1 SV=1;tr|H0Y9N4|H0Y9N4_HUMAN COMM domain-containing	Q9Y6G5	1964900	1907800	1738900	1559800	1938400	2046000	2223000	2230300	2183300	2085900	2090800	0			20.906	20.8635	20.7297	20.5729	20.8864	20.9644	21.0841	21.0888	21.0581	20.9922	20.9956	Q9Y6G5	0.269474		Q9Y6G5	0.245796	20.9146	3.54144	0.00105142	0.0209567	-1.02356	sp|Q9Y6G5|COMDA_HUMAN COMM domain-containing protein 10 OS=Homo sapiens OX=9606 GN=COMMD10 PE=1 SV=1;tr|D6RJ90|D6RJ90_HUMAN COMM domain containing 10, isoform CRA_b OS=Homo sapiens OX=9606 GN=COMMD10 PE=1 SV=1;tr|H0Y9N4|H0Y9N4_HUMAN COMM domain-containing				Q9Y6G5	0.245796	20.9146	0
2170	8098;25752;33537;55775;57276	O95363;A0A3B3ITR6;Q5JRF7	Phenylalanine--tRNA ligase, mitochondrial	FARS2	sp|O95363|SYFM_HUMAN Phenylalanine--tRNA ligase, mitochondrial OS=Homo sapiens OX=9606 GN=FARS2 PE=1 SV=1;tr|A0A3B3ITR6|A0A3B3ITR6_HUMAN Phenylalanine--tRNA ligase, mitochondrial OS=Homo sapiens OX=9606 GN=FARS2 PE=1 SV=1	O95363	1796400	1616600	1527600	1457100	1707300	1828700	2158000	1882100	1850100	1881600	1874000	0			20.7767	20.6245	20.5428	20.4747	20.7033	20.8024	21.0413	20.8439	20.8192	20.8435	20.8377	O95363	0.265372		O95363	0.24565	20.7472	3.52122	0.00111394	0.0216668	-1.07721	sp|O95363|SYFM_HUMAN Phenylalanine--tRNA ligase, mitochondrial OS=Homo sapiens OX=9606 GN=FARS2 PE=1 SV=1;tr|A0A3B3ITR6|A0A3B3ITR6_HUMAN Phenylalanine--tRNA ligase, mitochondrial OS=Homo sapiens OX=9606 GN=FARS2 PE=1 SV=1				O95363	0.24565	20.7472	0
5974	30584;37962;42499;64591	Q8NCR1		VPS53	tr|Q8NCR1|Q8NCR1_HUMAN VPS53 protein OS=Homo sapiens OX=9606 GN=VPS53 PE=2 SV=2	Q8NCR1	2281700	2912900	1778400	1568900	2473200	2377900	2841500	2532200	2438100	2573100	2716200	0			21.1217	21.474	20.7621	20.5813	21.238	21.1813	21.4382	21.272	21.2173	21.2951	21.3732	Q8NCR1	0.295977		Q8NCR1	0.245346	21.1581	2.49839	0.0168127	0.0731941	-3.54908	tr|Q8NCR1|Q8NCR1_HUMAN VPS53 protein OS=Homo sapiens OX=9606 GN=VPS53 PE=2 SV=2				Q8NCR1	0.245346	21.1581	0
6084	35919;46571;48649	Q92484	Acid sphingomyelinase-like phosphodiesterase 3a	SMPDL3A	sp|Q92484|ASM3A_HUMAN Acid sphingomyelinase-like phosphodiesterase 3a OS=Homo sapiens OX=9606 GN=SMPDL3A PE=1 SV=2	Q92484	1080800	951110	864510	812460	989760	1005400	1308300	1110900	1187400	963410	1124500	0			20.0437	19.8592	19.7215	19.6319	19.9167	19.9393	20.3193	20.0833	20.1794	19.8778	20.1009	Q92484	0.265717		Q92484	0.245192	19.9572	3.09659	0.0036236	0.0401245	-2.16514	sp|Q92484|ASM3A_HUMAN Acid sphingomyelinase-like phosphodiesterase 3a OS=Homo sapiens OX=9606 GN=SMPDL3A PE=1 SV=2				Q92484	0.245192	19.9572	0
5978	18335;42904	Q8ND87;Q96NT1	Nucleosome assembly protein 1-like 5	DKFZp434K0835;NAP1L5	tr|Q8ND87|Q8ND87_HUMAN Uncharacterized protein DKFZp434K0835 OS=Homo sapiens OX=9606 GN=DKFZp434K0835 PE=2 SV=1;sp|Q96NT1|NP1L5_HUMAN Nucleosome assembly protein 1-like 5 OS=Homo sapiens OX=9606 GN=NAP1L5 PE=1 SV=1	Q8ND87	1183200	1203400	1032000	926530	1043200	1134000	1361100	1324300	1348400	1205000	1074000	0			20.1743	20.1987	19.977	19.8215	19.9926	20.113	20.3763	20.3368	20.3628	20.2006	20.0346	Q8ND87	0.235052		Q8ND87	0.245108	20.1554	3.32829	0.00191926	0.0294605	-1.58093	tr|Q8ND87|Q8ND87_HUMAN Uncharacterized protein DKFZp434K0835 OS=Homo sapiens OX=9606 GN=DKFZp434K0835 PE=2 SV=1;sp|Q96NT1|NP1L5_HUMAN Nucleosome assembly protein 1-like 5 OS=Homo sapiens OX=9606 GN=NAP1L5 PE=1 SV=1				Q8ND87	0.245108	20.1554	0
4954	6946;8208;8209;8210;11390;13643;17705;23674;27720;30731;30732;31530;38122;38123;41039;45373;45471;47340;48696;49572;50572;51966;51968;55205;57153;61028;61029;65815;67733	P68104;Q5VTE0;Q6IPN6;Q6IPS9;Q53HR5;Q53HM9;Q6IPT9;Q53G85;A8K9C4;Q53HQ7;Q53GA1;A0A087WVQ9;Q53G89;Q96RE1;B4DV42;Q8IUB0;Q9H2I7;A0A087WV01;Q53HR1;Q504Z0;Q6P4C9;Q96CD8;Q9NZS6;B4E2C5;A9X7H1	Elongation factor 1-alpha 1;Putative elongation factor 1-alpha-like 3;Elongation factor 1-alpha	EEF1A1;EEF1A1P5;EEF1A1L14	sp|P68104|EF1A1_HUMAN Elongation factor 1-alpha 1 OS=Homo sapiens OX=9606 GN=EEF1A1 PE=1 SV=1;sp|Q5VTE0|EF1A3_HUMAN Putative elongation factor 1-alpha-like 3 OS=Homo sapiens OX=9606 GN=EEF1A1P5 PE=5 SV=1;tr|Q6IPN6|Q6IPN6_HUMAN Elongation factor 1-alpha OS=	P68104	639570000	582960000	596930000	530650000	619980000	677680000	726890000	730800000	691680000	687590000	548920000	0			29.2525	29.1188	29.153	28.9832	29.2077	29.336	29.4372	29.4449	29.3655	29.357	29.032	P68104	0.261238		P68104	0.245084	29.2656	3.68935	0.000686524	0.0164476	-0.626733	sp|P68104|EF1A1_HUMAN Elongation factor 1-alpha 1 OS=Homo sapiens OX=9606 GN=EEF1A1 PE=1 SV=1;sp|Q5VTE0|EF1A3_HUMAN Putative elongation factor 1-alpha-like 3 OS=Homo sapiens OX=9606 GN=EEF1A1P5 PE=5 SV=1;tr|Q6IPN6|Q6IPN6_HUMAN Elongation factor 1-alpha OS=				P68104	0.245084	29.2656	0
4400	32955;62636	Q5TIH2;O95562	Vesicle transport protein SFT2B	SFT2D2	tr|Q5TIH2|Q5TIH2_HUMAN Vesicle transport protein OS=Homo sapiens OX=9606 GN=SFT2D2 PE=1 SV=1;sp|O95562|SFT2B_HUMAN Vesicle transport protein SFT2B OS=Homo sapiens OX=9606 GN=SFT2D2 PE=1 SV=1	Q5TIH2	2490200	2665800	2230000	2106600	2604500	2688600	3061500	2985900	2925500	2641300	2311400	0			21.2478	21.3461	21.0886	21.0065	21.3126	21.3584	21.5458	21.5097	21.4803	21.3328	21.1403	Q5TIH2	0.273143		Q5TIH2	0.245082	21.3229	3.42206	0.00147564	0.0259547	-1.33794	tr|Q5TIH2|Q5TIH2_HUMAN Vesicle transport protein OS=Homo sapiens OX=9606 GN=SFT2D2 PE=1 SV=1;sp|O95562|SFT2B_HUMAN Vesicle transport protein SFT2B OS=Homo sapiens OX=9606 GN=SFT2D2 PE=1 SV=1				Q5TIH2	0.245082	21.3229	0
542	1647;13457;23237;25594;25838;27818;28871;32930;33084;33096;43975;45558;47537;50595;55843;57409;61296;61814;64116;65692;67066	Q9UHS8;B2R7T6;A0A024R5X2;Q9Y6N5;Q53HW7;H3BNX3;H3BMS6;H3BNP9;A0A1B0GXB4;H3BV36	Sulfide:quinone oxidoreductase, mitochondrial	hCG_2001986;SQRDL	tr|Q9UHS8|Q9UHS8_HUMAN PRO1975 OS=Homo sapiens OX=9606 PE=2 SV=1;tr|B2R7T6|B2R7T6_HUMAN cDNA, FLJ93596, highly similar to Homo sapiens sulfide quinone reductase-like (yeast) (SQRDL), mRNA OS=Homo sapiens OX=9606 PE=2 SV=1;tr|A0A024R5X2|A0A024R5X2_HUMAN HCG	Q9UHS8	983660	967070	727390	661750	1035500	982420	1106900	997570	1016900	1004000	1031200	0			19.9078	19.8833	19.4724	19.3359	19.9819	19.906	20.0781	19.9281	19.9557	19.9373	19.9759	Q9UHS8	0.311202		Q9UHS8	0.24479	19.8386	2.81626	0.00759226	0.0522683	-2.83778	tr|Q9UHS8|Q9UHS8_HUMAN PRO1975 OS=Homo sapiens OX=9606 PE=2 SV=1;tr|B2R7T6|B2R7T6_HUMAN cDNA, FLJ93596, highly similar to Homo sapiens sulfide quinone reductase-like (yeast) (SQRDL), mRNA OS=Homo sapiens OX=9606 PE=2 SV=1;tr|A0A024R5X2|A0A024R5X2_HUMAN HCG				Q9UHS8	0.24479	19.8386	0
6403	2172;4033;15640;21217;37121;43779;63242;63277;65145;67632	Q9BYD2;Q5SZR1;A0A1W2PQB6;A0A1W2PS92;A0A1W2PPE5;B4DDZ7;A0A1W2PPK1;A0A1W2PRK9	39S ribosomal protein L9, mitochondrial	MRPL9	sp|Q9BYD2|RM09_HUMAN 39S ribosomal protein L9, mitochondrial OS=Homo sapiens OX=9606 GN=MRPL9 PE=1 SV=2;tr|Q5SZR1|Q5SZR1_HUMAN 39S ribosomal protein L9, mitochondrial OS=Homo sapiens OX=9606 GN=MRPL9 PE=1 SV=1	Q9BYD2	6755600	7258300	5383800	4645600	7227100	6802000	7905700	7250500	7402500	7172600	7383400	0			22.6877	22.7912	22.3602	22.1474	22.785	22.6975	22.9145	22.7897	22.8196	22.7741	22.8159	Q9BYD2	0.30244		Q9BYD2	0.244768	22.6767	2.82098	0.00750048	0.052121	-2.82679	sp|Q9BYD2|RM09_HUMAN 39S ribosomal protein L9, mitochondrial OS=Homo sapiens OX=9606 GN=MRPL9 PE=1 SV=2;tr|Q5SZR1|Q5SZR1_HUMAN 39S ribosomal protein L9, mitochondrial OS=Homo sapiens OX=9606 GN=MRPL9 PE=1 SV=1				Q9BYD2	0.244768	22.6767	0
3616	10198;11039;12602;13396;18802;23901;25267;25434;38969;44932;57242;63325;64152;64804;64825	E5KMT6;E5KMT5;Q9Y606;A0A024RBS6;F5H1S9;G8JLB3;F5GXL3;F5GY32;F5H168;F8W9U5;F5H1B2	tRNA pseudouridine synthase;tRNA pseudouridine synthase A, mitochondrial	PUS1	tr|E5KMT6|E5KMT6_HUMAN tRNA pseudouridine synthase OS=Homo sapiens OX=9606 PE=3 SV=1;tr|E5KMT5|E5KMT5_HUMAN tRNA pseudouridine synthase OS=Homo sapiens OX=9606 PE=3 SV=1;sp|Q9Y606|TRUA_HUMAN tRNA pseudouridine synthase A OS=Homo sapiens OX=9606 GN=PUS1 PE=	E5KMT6	6175100	5716900	5058100	4774700	5953700	6209000	7184400	6417300	6407500	6458500	6632500	0			22.558	22.4468	22.2702	22.187	22.5054	22.5659	22.7764	22.6135	22.6113	22.6228	22.6611	E5KMT6	0.272507		E5KMT6	0.244534	22.5157	3.39965	0.00157175	0.0269616	-1.39634	tr|E5KMT6|E5KMT6_HUMAN tRNA pseudouridine synthase OS=Homo sapiens OX=9606 PE=3 SV=1;tr|E5KMT5|E5KMT5_HUMAN tRNA pseudouridine synthase OS=Homo sapiens OX=9606 PE=3 SV=1;sp|Q9Y606|TRUA_HUMAN tRNA pseudouridine synthase A OS=Homo sapiens OX=9606 GN=PUS1 PE=				E5KMT6	0.244534	22.5157	0
6845	910;17393;17394;20425;24133;36466;51851;54115;56642	Q9UPQ0;B7Z656;B7Z3F1;B7Z3G0;B7Z5Q8;E7EPK0;E9PDJ9;B7Z2J4;H0Y8P3;D6RD46;G5EA03;B7Z5G6;B7Z7Z0;Q6N054	LIM and calponin homology domains-containing protein 1	LIMCH1	sp|Q9UPQ0|LIMC1_HUMAN LIM and calponin homology domains-containing protein 1 OS=Homo sapiens OX=9606 GN=LIMCH1 PE=1 SV=4;tr|B7Z656|B7Z656_HUMAN cDNA FLJ51076, weakly similar to LIM domain only protein 7 OS=Homo sapiens OX=9606 PE=2 SV=1;tr|B7Z3F1|B7Z3F1_HU	Q9UPQ0	6344900	6616700	5107400	4836300	6653500	6899100	7530700	6786900	6826600	6689200	7157100	0			22.5972	22.6577	22.2842	22.2055	22.6657	22.718	22.8443	22.6943	22.7027	22.6734	22.7709	Q9UPQ0	0.290438		Q9UPQ0	0.244526	22.6043	3.14244	0.00320063	0.0385421	-2.05145	sp|Q9UPQ0|LIMC1_HUMAN LIM and calponin homology domains-containing protein 1 OS=Homo sapiens OX=9606 GN=LIMCH1 PE=1 SV=4;tr|B7Z656|B7Z656_HUMAN cDNA FLJ51076, weakly similar to LIM domain only protein 7 OS=Homo sapiens OX=9606 PE=2 SV=1;tr|B7Z3F1|B7Z3F1_HU				Q9UPQ0	0.244526	22.6043	0
6965	3402;6699	Q9Y6X3;V9GYS3;V9GZ52;Q9Y4B3	MAU2 chromatid cohesion factor homolog	MAU2	sp|Q9Y6X3|SCC4_HUMAN MAU2 chromatid cohesion factor homolog OS=Homo sapiens OX=9606 GN=MAU2 PE=1 SV=2;tr|V9GYS3|V9GYS3_HUMAN MAU2 chromatid cohesion factor homolog (Fragment) OS=Homo sapiens OX=9606 GN=MAU2 PE=1 SV=1;tr|V9GZ52|V9GZ52_HUMAN MAU2 chromatid c	Q9Y6X3	73869	67090	62383	61871	70424	74665	86716	81551	81338	73072	77010	0			16.1727	16.0338	15.9289	15.917	16.1038	16.1881	16.404	16.3154	16.3116	16.157	16.2328	Q9Y6X3	0.262161		Q9Y6X3	0.244022	16.1532	3.52201	0.00111142	0.0216668	-1.07511	sp|Q9Y6X3|SCC4_HUMAN MAU2 chromatid cohesion factor homolog OS=Homo sapiens OX=9606 GN=MAU2 PE=1 SV=2;tr|V9GYS3|V9GYS3_HUMAN MAU2 chromatid cohesion factor homolog (Fragment) OS=Homo sapiens OX=9606 GN=MAU2 PE=1 SV=1;tr|V9GZ52|V9GZ52_HUMAN MAU2 chromatid c				Q9Y6X3	0.244022	16.1532	0
1115	911;12571;22981;31302;44542;50769;66957	A0A024RDG5;Q53EU6	Glycerol-3-phosphate acyltransferase 3	HMFN0839;AGPAT9	tr|A0A024RDG5|A0A024RDG5_HUMAN Testis secretory sperm-binding protein Li 213e OS=Homo sapiens OX=9606 GN=HMFN0839 PE=2 SV=1;sp|Q53EU6|GPAT3_HUMAN Glycerol-3-phosphate acyltransferase 3 OS=Homo sapiens OX=9606 GN=GPAT3 PE=1 SV=2	A0A024RDG5	2478000	2510200	2174000	2106500	2752100	3016400	3039800	2812400	2645000	2677200	2706900	0			21.2407	21.2594	21.0519	21.0064	21.3921	21.5244	21.5356	21.4234	21.3348	21.3523	21.3682	A0A024RDG5	0.294475		A0A024RDG5	0.243978	21.3121	3.35897	0.00176172	0.0281824	-1.50184	tr|A0A024RDG5|A0A024RDG5_HUMAN Testis secretory sperm-binding protein Li 213e OS=Homo sapiens OX=9606 GN=HMFN0839 PE=2 SV=1;sp|Q53EU6|GPAT3_HUMAN Glycerol-3-phosphate acyltransferase 3 OS=Homo sapiens OX=9606 GN=GPAT3 PE=1 SV=2				A0A024RDG5	0.243978	21.3121	0
6193	21342;36448	Q96F44;R4GMV1;R4GNB9	E3 ubiquitin-protein ligase TRIM11	TRIM11	sp|Q96F44|TRI11_HUMAN E3 ubiquitin-protein ligase TRIM11 OS=Homo sapiens OX=9606 GN=TRIM11 PE=1 SV=2;tr|R4GMV1|R4GMV1_HUMAN E3 ubiquitin-protein ligase TRIM11 OS=Homo sapiens OX=9606 GN=TRIM11 PE=1 SV=1;tr|R4GNB9|R4GNB9_HUMAN E3 ubiquitin-protein ligase TR	Q96F44	213570	229150	119370	123040	218700	185670	210610	208060	232850	193170	549600	0			17.7044	17.8059	16.8651	16.9088	17.7386	17.5024	17.6842	17.6666	17.829	17.5595	19.068	Q96F44	0.327323		Q96F44	0.243812	17.5265	2.07694	0.0444608	0.112531	-4.39523	sp|Q96F44|TRI11_HUMAN E3 ubiquitin-protein ligase TRIM11 OS=Homo sapiens OX=9606 GN=TRIM11 PE=1 SV=2;tr|R4GMV1|R4GMV1_HUMAN E3 ubiquitin-protein ligase TRIM11 OS=Homo sapiens OX=9606 GN=TRIM11 PE=1 SV=1;tr|R4GNB9|R4GNB9_HUMAN E3 ubiquitin-protein ligase TR				Q96F44	0.243812	17.5265	0
5023	4028;13795;13796;16112;26101;27013;48968;67515	Q2TNI1;Q03135;A9XTE5;Q59E85;E9PCT5;C9JKI3;Q7Z4F3;A0A024R757;A0A1I9UVK8;A0A024R2D8;P56539	Caveolin;Caveolin-1	CAV1	tr|Q2TNI1|Q2TNI1_HUMAN Caveolin OS=Homo sapiens OX=9606 GN=CAV1 PE=2 SV=1;sp|Q03135|CAV1_HUMAN Caveolin-1 OS=Homo sapiens OX=9606 GN=CAV1 PE=1 SV=4;tr|A9XTE5|A9XTE5_HUMAN Caveolin (Fragment) OS=Homo sapiens OX=9606 PE=2 SV=1;tr|Q59E85|Q59E85_HUMAN Caveolin	Q2TNI1	15540000	13416000	13923000	13027000	14643000	15796000	17025000	16667000	16991000	16920000	43600000	0			23.8895	23.6775	23.731	23.635	23.8037	23.9131	24.0211	23.9905	24.0183	24.0122	25.3778	Q2TNI1	0.257815		Q2TNI1	0.243718	23.8692	3.68122	0.000702914	0.016628	-0.648736	tr|Q2TNI1|Q2TNI1_HUMAN Caveolin OS=Homo sapiens OX=9606 GN=CAV1 PE=2 SV=1;sp|Q03135|CAV1_HUMAN Caveolin-1 OS=Homo sapiens OX=9606 GN=CAV1 PE=1 SV=4;tr|A9XTE5|A9XTE5_HUMAN Caveolin (Fragment) OS=Homo sapiens OX=9606 PE=2 SV=1;tr|Q59E85|Q59E85_HUMAN Caveolin				Q2TNI1	0.243718	23.8692	0
1376	2436;54773	A8MYI2;H0Y6F6;A0A0A0MRJ3;Q8NEY1	Neuron navigator 1	NAV1	tr|A8MYI2|A8MYI2_HUMAN cDNA FLJ31596 fis, clone NT2RI2002530, highly similar to Homo sapiens neuron navigator 1 (NAV1), mRNA (Fragment) OS=Homo sapiens OX=9606 PE=2 SV=2;tr|H0Y6F6|H0Y6F6_HUMAN Neuron navigator 1 (Fragment) OS=Homo sapiens OX=9606 GN=NAV1 P	A8MYI2	482580	514330	405390	346650	503160	463970	623710	535110	570050	462640	544290	0			18.8804	18.9723	18.6289	18.4031	18.9407	18.8237	19.2505	19.0295	19.1207	18.8195	19.054	A8MYI2	0.287581		A8MYI2	0.24369	18.8869	2.76543	0.00864976	0.055664	-2.95538	tr|A8MYI2|A8MYI2_HUMAN cDNA FLJ31596 fis, clone NT2RI2002530, highly similar to Homo sapiens neuron navigator 1 (NAV1), mRNA (Fragment) OS=Homo sapiens OX=9606 PE=2 SV=2;tr|H0Y6F6|H0Y6F6_HUMAN Neuron navigator 1 (Fragment) OS=Homo sapiens OX=9606 GN=NAV1 P				A8MYI2	0.24369	18.8869	0
422	856;26473;32873	A0A024R499;P35568	Insulin receptor substrate 1	IRS1	tr|A0A024R499|A0A024R499_HUMAN Insulin receptor substrate 1, isoform CRA_a OS=Homo sapiens OX=9606 GN=IRS1 PE=4 SV=1;sp|P35568|IRS1_HUMAN Insulin receptor substrate 1 OS=Homo sapiens OX=9606 GN=IRS1 PE=1 SV=1	A0A024R499	1577500	1349600	1328200	1187400	1291500	1405100	1609000	1732000	1816700	1416600	1265200	0			20.5892	20.3641	20.341	20.1794	20.3006	20.4222	20.6177	20.724	20.7929	20.434	20.2709	A0A024R499	0.229744		A0A024R499	0.243306	20.4765	3.15608	0.00308414	0.0376145	-2.01745	tr|A0A024R499|A0A024R499_HUMAN Insulin receptor substrate 1, isoform CRA_a OS=Homo sapiens OX=9606 GN=IRS1 PE=4 SV=1;sp|P35568|IRS1_HUMAN Insulin receptor substrate 1 OS=Homo sapiens OX=9606 GN=IRS1 PE=1 SV=1				A0A024R499	0.243306	20.4765	0
4384	1008;4005;4937;12565;24440;25249;29739;33964;36664;42349;55770;61763;67663	O95248;Q68CX1;Q59EX9;Q86TK5;H0Y5W8;Q6PGN5	Myotubularin-related protein 5	SBF1	sp|O95248|MTMR5_HUMAN Myotubularin-related protein 5 OS=Homo sapiens OX=9606 GN=SBF1 PE=1 SV=4	O95248	4404300	3701500	3842100	3617200	3947300	4260600	5022700	4695600	4820700	4290200	4471400	0			22.0705	21.8197	21.8735	21.7864	21.9124	22.0226	22.26	22.1629	22.2008	22.0326	22.0923	O95248	0.248275		O95248	0.24329	22.0141	3.5004	0.001182	0.0224329	-1.13226	sp|O95248|MTMR5_HUMAN Myotubularin-related protein 5 OS=Homo sapiens OX=9606 GN=SBF1 PE=1 SV=4				O95248	0.24329	22.0141	0
2003	569;61149	B2RD93;A0A2X0SFL9;Q6ZW31;M0R101;M0QXZ8;O60432	Rho GTPase-activating protein SYDE1	SYDE1	tr|B2RD93|B2RD93_HUMAN cDNA, FLJ96511 OS=Homo sapiens OX=9606 PE=2 SV=1;tr|A0A2X0SFL9|A0A2X0SFL9_HUMAN SYDE1 (Fragment) OS=Homo sapiens OX=9606 GN=SYDE1 PE=4 SV=1;sp|Q6ZW31|SYDE1_HUMAN Rho GTPase-activating protein SYDE1 OS=Homo sapiens OX=9606 GN=SYDE1 PE	B2RD93	1032700	1310500	845710	819520	1250000	1188500	1320900	1229100	1160500	1216500	1582600	0			19.978	20.3217	19.6898	19.6444	20.2535	20.1807	20.3331	20.2292	20.1463	20.2143	20.5939	B2RD93	0.312241		B2RD93	0.243236	20.0991	2.70679	0.0100388	0.0587876	-3.08927	tr|B2RD93|B2RD93_HUMAN cDNA, FLJ96511 OS=Homo sapiens OX=9606 PE=2 SV=1;tr|A0A2X0SFL9|A0A2X0SFL9_HUMAN SYDE1 (Fragment) OS=Homo sapiens OX=9606 GN=SYDE1 PE=4 SV=1;sp|Q6ZW31|SYDE1_HUMAN Rho GTPase-activating protein SYDE1 OS=Homo sapiens OX=9606 GN=SYDE1 PE				B2RD93	0.243236	20.0991	0
3789	273;8119;58619	F8VUJ3;Q8N4A0	Polypeptide N-acetylgalactosaminyltransferase;Polypeptide N-acetylgalactosaminyltransferase 4	POC1B-GALNT4;GALNT4	tr|F8VUJ3|F8VUJ3_HUMAN Polypeptide N-acetylgalactosaminyltransferase OS=Homo sapiens OX=9606 GN=POC1B-GALNT4 PE=3 SV=1;sp|Q8N4A0|GALT4_HUMAN Polypeptide N-acetylgalactosaminyltransferase 4 OS=Homo sapiens OX=9606 GN=GALNT4 PE=1 SV=2	F8VUJ3	112520	103580	102790	100330	113490	122530	132930	123850	131410	119490	96425	0			16.7798	16.6604	16.6493	16.6144	16.7922	16.9028	17.0203	16.9182	17.0037	16.8665	16.5571	F8VUJ3	0.266327		F8VUJ3	0.243082	16.8208	3.69447	0.000676381	0.0163769	-0.61285	tr|F8VUJ3|F8VUJ3_HUMAN Polypeptide N-acetylgalactosaminyltransferase OS=Homo sapiens OX=9606 GN=POC1B-GALNT4 PE=3 SV=1;sp|Q8N4A0|GALT4_HUMAN Polypeptide N-acetylgalactosaminyltransferase 4 OS=Homo sapiens OX=9606 GN=GALNT4 PE=1 SV=2				F8VUJ3	0.243082	16.8208	0
3136	1748;15400;15990;20198;23105;23404;25789;26559;36782;44968;54149;59679	B7Z705;B4DN31;Q9BWS9;A0A024RCB5;E9PPA0;E9PI70;E9PIP0;E9PRL3;E9PPH0;E9PKF1;H0YCC4;H0YC89;H0YDL6	Chitinase domain-containing protein 1	CHID1	tr|B7Z705|B7Z705_HUMAN cDNA FLJ56160 OS=Homo sapiens OX=9606 PE=2 SV=1;tr|B4DN31|B4DN31_HUMAN cDNA FLJ55809 OS=Homo sapiens OX=9606 PE=2 SV=1;sp|Q9BWS9|CHID1_HUMAN Chitinase domain-containing protein 1 OS=Homo sapiens OX=9606 GN=CHID1 PE=1 SV=1;tr|A0A024RC	B7Z705	9981800	11594000	7020700	6534600	10995000	10200000	12129000	10220000	10768000	9954400	13082000	0			23.2509	23.4669	22.7432	22.6397	23.3903	23.2821	23.532	23.2849	23.3603	23.2469	23.6411	B7Z705	0.316064		B7Z705	0.243026	23.2197	2.38432	0.0220866	0.0817249	-3.7896	tr|B7Z705|B7Z705_HUMAN cDNA FLJ56160 OS=Homo sapiens OX=9606 PE=2 SV=1;tr|B4DN31|B4DN31_HUMAN cDNA FLJ55809 OS=Homo sapiens OX=9606 PE=2 SV=1;sp|Q9BWS9|CHID1_HUMAN Chitinase domain-containing protein 1 OS=Homo sapiens OX=9606 GN=CHID1 PE=1 SV=1;tr|A0A024RC				B7Z705	0.243026	23.2197	0
3317	5384;18508;34696;37481;39387;48564	B7Z201;K7ENL9;B7Z3Q1;Q96DM3;B7Z2Y1;A0A087WZD4;K7EIS6	Uncharacterized protein C18orf8	C18orf8	tr|B7Z201|B7Z201_HUMAN cDNA FLJ61224 OS=Homo sapiens OX=9606 PE=2 SV=1;tr|K7ENL9|K7ENL9_HUMAN Regulator of MON1-CCZ1 complex OS=Homo sapiens OX=9606 GN=RMC1 PE=1 SV=1;tr|B7Z3Q1|B7Z3Q1_HUMAN cDNA FLJ55638 OS=Homo sapiens OX=9606 PE=2 SV=1;sp|Q96DM3|RMC1_HUM	B7Z201	1064200	952290	844210	838770	999860	1010600	1326900	1060800	1072300	1091900	994470	0			20.0213	19.861	19.6872	19.6779	19.9314	19.9468	20.3396	20.0167	20.0323	20.0584	19.9236	B7Z201	0.266879		B7Z201	0.242982	19.9573	3.20182	0.00272201	0.0355481	-1.90277	tr|B7Z201|B7Z201_HUMAN cDNA FLJ61224 OS=Homo sapiens OX=9606 PE=2 SV=1;tr|K7ENL9|K7ENL9_HUMAN Regulator of MON1-CCZ1 complex OS=Homo sapiens OX=9606 GN=RMC1 PE=1 SV=1;tr|B7Z3Q1|B7Z3Q1_HUMAN cDNA FLJ55638 OS=Homo sapiens OX=9606 PE=2 SV=1;sp|Q96DM3|RMC1_HUM				B7Z201	0.242982	19.9573	0
6543	8296;55003	Q9HAW0;E5RGF6;E5RGX1	Transcription factor IIIB 50 kDa subunit	BRF2	sp|Q9HAW0|BRF2_HUMAN Transcription factor IIIB 50 kDa subunit OS=Homo sapiens OX=9606 GN=BRF2 PE=1 SV=1;tr|E5RGF6|E5RGF6_HUMAN Transcription factor IIIB 50 kDa subunit OS=Homo sapiens OX=9606 GN=BRF2 PE=1 SV=1;tr|E5RGX1|E5RGX1_HUMAN Transcription factor II	Q9HAW0	807550	691130	728770	653470	747720	772590	914370	921320	890430	795590	747830	0			19.6232	19.3986	19.4751	19.3178	19.5121	19.5593	19.8024	19.8133	19.7641	19.6017	19.5124	Q9HAW0	0.25452		Q9HAW0	0.242824	19.5868	3.43154	0.00143673	0.0253416	-1.31319	sp|Q9HAW0|BRF2_HUMAN Transcription factor IIIB 50 kDa subunit OS=Homo sapiens OX=9606 GN=BRF2 PE=1 SV=1;tr|E5RGF6|E5RGF6_HUMAN Transcription factor IIIB 50 kDa subunit OS=Homo sapiens OX=9606 GN=BRF2 PE=1 SV=1;tr|E5RGX1|E5RGX1_HUMAN Transcription factor II				Q9HAW0	0.242824	19.5868	0
3056	4685;5929;14055;29357;35038;41554;47385;61792	B4DJ73;B4DHL5;B4E228;Q6NW34;B4DVN9;B4DUV5;B4E1X5;E9PFF8;B4DDJ6	Uncharacterized protein C3orf17	C3orf17	tr|B4DJ73|B4DJ73_HUMAN cDNA FLJ59546 OS=Homo sapiens OX=9606 PE=2 SV=1;tr|B4DHL5|B4DHL5_HUMAN cDNA FLJ53326 OS=Homo sapiens OX=9606 PE=2 SV=1;tr|B4E228|B4E228_HUMAN cDNA FLJ53294 OS=Homo sapiens OX=9606 PE=2 SV=1;sp|Q6NW34|NEPRO_HUMAN Nucleolus and neural	B4DJ73	4481600	4427600	3595800	3448600	4559200	4586500	5244500	4854900	4796600	4644900	4688600	0			22.0956	22.0781	21.7779	21.7176	22.1203	22.129	22.3224	22.211	22.1936	22.1472	22.1607	B4DJ73	0.283346		B4DJ73	0.242732	22.0793	3.22797	0.00253351	0.0343896	-1.83679	tr|B4DJ73|B4DJ73_HUMAN cDNA FLJ59546 OS=Homo sapiens OX=9606 PE=2 SV=1;tr|B4DHL5|B4DHL5_HUMAN cDNA FLJ53326 OS=Homo sapiens OX=9606 PE=2 SV=1;tr|B4E228|B4E228_HUMAN cDNA FLJ53294 OS=Homo sapiens OX=9606 PE=2 SV=1;sp|Q6NW34|NEPRO_HUMAN Nucleolus and neural				B4DJ73	0.242732	22.0793	0
6903	12786;41764;64409;65248;66488	Q9Y3D8;A0A087WVD7;A0A087WY94;D6RDH4	Adenylate kinase isoenzyme 6	AK6;TAF9	sp|Q9Y3D8|KAD6_HUMAN Adenylate kinase isoenzyme 6 OS=Homo sapiens OX=9606 GN=AK6 PE=1 SV=1;tr|A0A087WVD7|A0A087WVD7_HUMAN Adenylate kinase isoenzyme 6 OS=Homo sapiens OX=9606 GN=AK6 PE=1 SV=1	Q9Y3D8	1587200	1374900	1368000	1261900	1439000	1603000	1775100	1606200	1611800	1705000	1482200	0			20.5981	20.3909	20.3836	20.2672	20.4566	20.6123	20.7595	20.6152	20.6202	20.7013	20.4993	Q9Y3D8	0.251782		Q9Y3D8	0.242444	20.5405	3.55245	0.00101883	0.0205213	-0.9943	sp|Q9Y3D8|KAD6_HUMAN Adenylate kinase isoenzyme 6 OS=Homo sapiens OX=9606 GN=AK6 PE=1 SV=1;tr|A0A087WVD7|A0A087WVD7_HUMAN Adenylate kinase isoenzyme 6 OS=Homo sapiens OX=9606 GN=AK6 PE=1 SV=1				Q9Y3D8	0.242444	20.5405	0
3066	2784;24936	B4DIR9;Q9NYJ8;U3KQR0;A0A1B0GV57	TGF-beta-activated kinase 1 and MAP3K7-binding protein 2	TAB2	tr|B4DIR9|B4DIR9_HUMAN cDNA FLJ57993, highly similar to Mitogen-activated protein kinase kinase kinase7-interacting protein 2 OS=Homo sapiens OX=9606 PE=2 SV=1;sp|Q9NYJ8|TAB2_HUMAN TGF-beta-activated kinase 1 and MAP3K7-binding protein 2 OS=Homo sapiens OX	B4DIR9	487870	550180	470320	461450	587640	564420	631790	595000	604120	618730	515290	0			18.8961	19.0695	18.8433	18.8158	19.1646	19.1064	19.2691	19.1825	19.2045	19.2389	18.975	B4DIR9	0.294098		B4DIR9	0.242422	19.0791	3.43403	0.00142665	0.0253116	-1.30667	tr|B4DIR9|B4DIR9_HUMAN cDNA FLJ57993, highly similar to Mitogen-activated protein kinase kinase kinase7-interacting protein 2 OS=Homo sapiens OX=9606 PE=2 SV=1;sp|Q9NYJ8|TAB2_HUMAN TGF-beta-activated kinase 1 and MAP3K7-binding protein 2 OS=Homo sapiens OX				B4DIR9	0.242422	19.0791	0
5064	3805;6314;6480;17846;22284;25419;29165;31357;39633;41610;57400;63742;64611;65537	Q08426;A0PJI6;C9JJE0	Peroxisomal bifunctional enzyme;Enoyl-CoA hydratase/3,2-trans-enoyl-CoA isomerase;3-hydroxyacyl-CoA dehydrogenase	EHHADH	sp|Q08426|ECHP_HUMAN Peroxisomal bifunctional enzyme OS=Homo sapiens OX=9606 GN=EHHADH PE=1 SV=3;tr|A0PJI6|A0PJI6_HUMAN EHHADH protein (Fragment) OS=Homo sapiens OX=9606 GN=EHHADH PE=2 SV=1	Q08426	112970	110620	98845	87171	113890	125340	130000	123030	116450	121700	99486	0			16.7856	16.7553	16.5929	16.4116	16.7973	16.9355	16.9882	16.9087	16.8294	16.893	16.6022	Q08426	0.274604		Q08426	0.242412	16.7897	3.38054	0.00165843	0.0274709	-1.44599	sp|Q08426|ECHP_HUMAN Peroxisomal bifunctional enzyme OS=Homo sapiens OX=9606 GN=EHHADH PE=1 SV=3;tr|A0PJI6|A0PJI6_HUMAN EHHADH protein (Fragment) OS=Homo sapiens OX=9606 GN=EHHADH PE=2 SV=1				Q08426	0.242412	16.7897	0
5348	6642;18044;19419;26796;30184;31854;37531;38077;44966	Q4G176;A0A3B3ISK9;F5H5A1;Q6P2C7;F5H362;F5H755;F5H2G6;H0YGC7;F5GX20;F5H3B2;H0YH37	Acyl-CoA synthetase family member 3, mitochondrial	ACSF3	sp|Q4G176|ACSF3_HUMAN Acyl-CoA synthetase family member 3, mitochondrial OS=Homo sapiens OX=9606 GN=ACSF3 PE=1 SV=3;tr|A0A3B3ISK9|A0A3B3ISK9_HUMAN Acyl-CoA synthetase family member 3, mitochondrial OS=Homo sapiens OX=9606 GN=ACSF3 PE=1 SV=1;tr|F5H5A1|F5H5A	Q4G176	5287200	4853400	4400800	4371100	5385200	5754100	6382100	5415000	5501700	5620700	4932000	0			22.3341	22.2106	22.0693	22.0596	22.3606	22.4562	22.6056	22.3685	22.3914	22.4223	22.2337	Q4G176	0.280432		Q4G176	0.241994	22.3278	3.40064	0.0015674	0.0269609	-1.39377	sp|Q4G176|ACSF3_HUMAN Acyl-CoA synthetase family member 3, mitochondrial OS=Homo sapiens OX=9606 GN=ACSF3 PE=1 SV=3;tr|A0A3B3ISK9|A0A3B3ISK9_HUMAN Acyl-CoA synthetase family member 3, mitochondrial OS=Homo sapiens OX=9606 GN=ACSF3 PE=1 SV=1;tr|F5H5A1|F5H5A				Q4G176	0.241994	22.3278	0
656	5149;6917;7107;36965;57424;64616	O95716;A0A024R7G2;B2R8W8	Ras-related protein Rab-3D	RAB3D	sp|O95716|RAB3D_HUMAN Ras-related protein Rab-3D OS=Homo sapiens OX=9606 GN=RAB3D PE=1 SV=1;tr|A0A024R7G2|A0A024R7G2_HUMAN Epididymis secretory sperm binding protein OS=Homo sapiens OX=9606 GN=RAB3D PE=2 SV=1;tr|B2R8W8|B2R8W8_HUMAN cDNA, FLJ94098, highly s	O95716	1970700	1826100	1665000	1504000	1880000	1888100	2448000	2084100	1978000	2056800	2352300	0			20.9103	20.8003	20.6671	20.5204	20.8423	20.8485	21.2232	20.991	20.9156	20.972	21.1656	O95716	0.26553		O95716	0.241974	20.8691	3.20724	0.00268191	0.0354034	-1.88913	sp|O95716|RAB3D_HUMAN Ras-related protein Rab-3D OS=Homo sapiens OX=9606 GN=RAB3D PE=1 SV=1;tr|A0A024R7G2|A0A024R7G2_HUMAN Epididymis secretory sperm binding protein OS=Homo sapiens OX=9606 GN=RAB3D PE=2 SV=1;tr|B2R8W8|B2R8W8_HUMAN cDNA, FLJ94098, highly s				O95716	0.241974	20.8691	0
2636	28822;35992	B5BU41;B0YIY3;Q14012;C9JES6;H7C071;A0A087WUR6;Q5SQQ7;Q8IU85	Calcium/calmodulin-dependent protein kinase type 1;Calcium/calmodulin-dependent protein kinase type 1D	CAMK1;CAMK1D	tr|B5BU41|B5BU41_HUMAN Calcium/calmodulin-dependent protein kinase I OS=Homo sapiens OX=9606 GN=CAMK1 PE=2 SV=1;tr|B0YIY3|B0YIY3_HUMAN Calcium/calmodulin-dependent protein kinase I, isoform CRA_a OS=Homo sapiens OX=9606 GN=CAMK1 PE=2 SV=1;sp|Q14012|KCC1A_H	B5BU41	415600	336480	364090	342250	396820	413510	481850	422520	469390	404660	364810	0			18.6648	18.3602	18.4739	18.3847	18.5981	18.6576	18.8782	18.6887	18.8404	18.6263	18.4768	B5BU41	0.267338		B5BU41	0.241894	18.6173	3.37774	0.00167147	0.0275374	-1.45323	tr|B5BU41|B5BU41_HUMAN Calcium/calmodulin-dependent protein kinase I OS=Homo sapiens OX=9606 GN=CAMK1 PE=2 SV=1;tr|B0YIY3|B0YIY3_HUMAN Calcium/calmodulin-dependent protein kinase I, isoform CRA_a OS=Homo sapiens OX=9606 GN=CAMK1 PE=2 SV=1;sp|Q14012|KCC1A_H				B5BU41	0.241894	18.6173	0
1500	61352	B3KP49;A0A0D9SEU5;R4GMX8;Q6VN20	Ran-binding protein 10	RANBP10	tr|B3KP49|B3KP49_HUMAN RAN binding protein 10, isoform CRA_b OS=Homo sapiens OX=9606 GN=RANBP10 PE=2 SV=1;tr|A0A0D9SEU5|A0A0D9SEU5_HUMAN Ran-binding protein 10 OS=Homo sapiens OX=9606 GN=RANBP10 PE=1 SV=1;tr|R4GMX8|R4GMX8_HUMAN Ran-binding protein 10 OS=Ho	B3KP49	2377100	2369600	2047100	1891900	2244000	2436900	2645800	2687800	2506800	2605400	1903500	0			21.1808	21.1762	20.9652	20.8514	21.0976	21.2166	21.3353	21.358	21.2574	21.3131	20.8602	B3KP49	0.252691		B3KP49	0.24184	21.1752	3.47039	0.00128717	0.023677	-1.21133	tr|B3KP49|B3KP49_HUMAN RAN binding protein 10, isoform CRA_b OS=Homo sapiens OX=9606 GN=RANBP10 PE=2 SV=1;tr|A0A0D9SEU5|A0A0D9SEU5_HUMAN Ran-binding protein 10 OS=Homo sapiens OX=9606 GN=RANBP10 PE=1 SV=1;tr|R4GMX8|R4GMX8_HUMAN Ran-binding protein 10 OS=Ho				B3KP49	0.24184	21.1752	0
493	58601	B7Z361;A0A024R5C4;B7Z3E3;B7Z8W8;O95197	Reticulon;Reticulon-3	RTN3	tr|B7Z361|B7Z361_HUMAN Reticulon OS=Homo sapiens OX=9606 PE=2 SV=1;tr|A0A024R5C4|A0A024R5C4_HUMAN Reticulon OS=Homo sapiens OX=9606 GN=RTN3 PE=4 SV=1;tr|B7Z3E3|B7Z3E3_HUMAN Reticulon OS=Homo sapiens OX=9606 PE=2 SV=1;tr|B7Z8W8|B7Z8W8_HUMAN Reticulon OS=Hom	B7Z361	6060000	5838200	5552200	5203900	6464200	6962200	7364100	6517200	6860300	6653100	5391400	0			22.5309	22.4771	22.4046	22.3112	22.624	22.7311	22.8121	22.6358	22.7098	22.6656	22.3622	B7Z361	0.279947		B7Z361	0.241328	22.5902	3.53879	0.00105943	0.0209631	-1.03061	tr|B7Z361|B7Z361_HUMAN Reticulon OS=Homo sapiens OX=9606 PE=2 SV=1;tr|A0A024R5C4|A0A024R5C4_HUMAN Reticulon OS=Homo sapiens OX=9606 GN=RTN3 PE=4 SV=1;tr|B7Z3E3|B7Z3E3_HUMAN Reticulon OS=Homo sapiens OX=9606 PE=2 SV=1;tr|B7Z8W8|B7Z8W8_HUMAN Reticulon OS=Hom				B7Z361	0.241328	22.5902	0
1844	9801;9811;21229	R4GND1;A0A1B0GX65;Q969T4;R4GN77;R4GMM6;R4GNG6	Ubiquitin-conjugating enzyme E2 E3	UBE2E3	tr|R4GND1|R4GND1_HUMAN Ubiquitin-conjugating enzyme E2 E3 OS=Homo sapiens OX=9606 GN=UBE2E3 PE=1 SV=8;tr|A0A1B0GX65|A0A1B0GX65_HUMAN Ubiquitin-conjugating enzyme E2 E3 (Fragment) OS=Homo sapiens OX=9606 GN=UBE2E3 PE=1 SV=1;sp|Q969T4|UB2E3_HUMAN Ubiquitin-c	R4GND1	427650	367440	350350	323240	381490	421220	472430	437170	413580	435160	368110	0			18.7061	18.4871	18.4184	18.3023	18.5413	18.6842	18.8497	18.7378	18.6578	18.7312	18.4898	R4GND1	0.253678		R4GND1	0.241116	18.6116	3.40262	0.00155872	0.0269446	-1.38863	tr|R4GND1|R4GND1_HUMAN Ubiquitin-conjugating enzyme E2 E3 OS=Homo sapiens OX=9606 GN=UBE2E3 PE=1 SV=8;tr|A0A1B0GX65|A0A1B0GX65_HUMAN Ubiquitin-conjugating enzyme E2 E3 (Fragment) OS=Homo sapiens OX=9606 GN=UBE2E3 PE=1 SV=1;sp|Q969T4|UB2E3_HUMAN Ubiquitin-c				R4GND1	0.241116	18.6116	0
4378	3041;19216;22269;24060;38289;43131;55091;55794;60301;64515;65418	O95210;B3KMK8;B4DK68	Starch-binding domain-containing protein 1	STBD1	sp|O95210|STBD1_HUMAN Starch-binding domain-containing protein 1 OS=Homo sapiens OX=9606 GN=STBD1 PE=1 SV=1;tr|B3KMK8|B3KMK8_HUMAN cDNA FLJ11293 fis, clone PLACE1009670, highly similar to Genethonin-1 OS=Homo sapiens OX=9606 PE=2 SV=1;tr|B4DK68|B4DK68_HUMA	O95210	9214300	8946800	8241700	7849200	9383100	10321000	10905000	10377000	9918800	9951200	9716900	0			23.1354	23.0929	22.9745	22.9041	23.1616	23.2991	23.3785	23.3069	23.2417	23.2464	23.2121	O95210	0.267776		O95210	0.2408	23.1741	3.589	0.000917431	0.0191587	-0.896818	sp|O95210|STBD1_HUMAN Starch-binding domain-containing protein 1 OS=Homo sapiens OX=9606 GN=STBD1 PE=1 SV=1;tr|B3KMK8|B3KMK8_HUMAN cDNA FLJ11293 fis, clone PLACE1009670, highly similar to Genethonin-1 OS=Homo sapiens OX=9606 PE=2 SV=1;tr|B4DK68|B4DK68_HUMA				O95210	0.2408	23.1741	0
6902	23182;31296;55151	Q9Y3D6	Mitochondrial fission 1 protein	FIS1	sp|Q9Y3D6|FIS1_HUMAN Mitochondrial fission 1 protein OS=Homo sapiens OX=9606 GN=FIS1 PE=1 SV=2	Q9Y3D6	4830500	4647400	3916900	3523600	4588500	4799600	5347300	5008100	5074200	5020900	5684200	0			22.2037	22.148	21.9013	21.7486	22.1296	22.1945	22.3504	22.2558	22.2748	22.2595	22.4385	Q9Y3D6	0.266582		Q9Y3D6	0.240746	22.1466	3.23339	0.00249603	0.0342013	-1.82309	sp|Q9Y3D6|FIS1_HUMAN Mitochondrial fission 1 protein OS=Homo sapiens OX=9606 GN=FIS1 PE=1 SV=2				Q9Y3D6	0.240746	22.1466	0
2486	505;5751;8180;10171;17606;19402;20200;28717;30358;33240;33584;37012;37465;40566;42738;44594;45439;47595;52981;53755;58194;59221;60939;62588;63784	A8K607;E7ESC6;Q9UIA9;D3DSQ7;B4DSP8;E5RIW1;H0YBE1;Q96M10;Q546R4;Q9H2T7	Exportin-7	XPO7	tr|A8K607|A8K607_HUMAN cDNA FLJ76855, highly similar to Homo sapiens exportin 7 (XPO7), mRNA OS=Homo sapiens OX=9606 PE=2 SV=1;tr|E7ESC6|E7ESC6_HUMAN Exportin-7 OS=Homo sapiens OX=9606 GN=XPO7 PE=1 SV=1;sp|Q9UIA9|XPO7_HUMAN Exportin-7 OS=Homo sapiens OX=96	A8K607	21467000	20045000	18500000	16884000	20246000	21701000	23117000	23318000	23088000	23204000	21125000	0			24.3556	24.2567	24.141	24.0092	24.2711	24.3713	24.4625	24.4749	24.4606	24.4679	24.3325	A8K607	0.256799		A8K607	0.2407	24.3271	3.5132	0.00113968	0.0219789	-1.09842	tr|A8K607|A8K607_HUMAN cDNA FLJ76855, highly similar to Homo sapiens exportin 7 (XPO7), mRNA OS=Homo sapiens OX=9606 PE=2 SV=1;tr|E7ESC6|E7ESC6_HUMAN Exportin-7 OS=Homo sapiens OX=9606 GN=XPO7 PE=1 SV=1;sp|Q9UIA9|XPO7_HUMAN Exportin-7 OS=Homo sapiens OX=96				A8K607	0.2407	24.3271	0
1361	42606;52158	A0A0A0MR05;Q9BVC4;H3BM50;H3BPU5;B4E2R3;H3BR25;H3BPT1;H3BN58;H3BSZ4	Target of rapamycin complex subunit LST8	MLST8	tr|A0A0A0MR05|A0A0A0MR05_HUMAN Target of rapamycin complex subunit LST8 OS=Homo sapiens OX=9606 GN=MLST8 PE=1 SV=1;sp|Q9BVC4|LST8_HUMAN Target of rapamycin complex subunit LST8 OS=Homo sapiens OX=9606 GN=MLST8 PE=1 SV=1;tr|H3BM50|H3BM50_HUMAN Target of rap	A0A0A0MR05	48479	55516	59007	48782	47023	58191	79332	62661	56242	51522	51845	0			15.5651	15.7606	15.8486	15.5741	15.5211	15.8285	16.2756	15.9353	15.7794	15.6529	15.6619	A0A0A0MR05	0.207247		A0A0A0MR05	0.240448	15.7741	2.8731	0.00655307	0.0495371	-2.70465	tr|A0A0A0MR05|A0A0A0MR05_HUMAN Target of rapamycin complex subunit LST8 OS=Homo sapiens OX=9606 GN=MLST8 PE=1 SV=1;sp|Q9BVC4|LST8_HUMAN Target of rapamycin complex subunit LST8 OS=Homo sapiens OX=9606 GN=MLST8 PE=1 SV=1;tr|H3BM50|H3BM50_HUMAN Target of rap				A0A0A0MR05	0.240448	15.7741	0
974	2000;5337;29257;47594;50139;50140;51297;53444;57231;58639;65486	A8K6V6;A0A024RBC5;P15586;B4DTT0;Q7Z3X3;H7C3P4;F6S8M0;B4E284;F5H4C6;H0YFA9;A0A0S2Z3S2;B4DKX8	N-acetylglucosamine-6-sulfatase	GNS;DKFZp686E12166	tr|A8K6V6|A8K6V6_HUMAN N-acetylglucosamine-6-sulfatase OS=Homo sapiens OX=9606 PE=2 SV=1;tr|A0A024RBC5|A0A024RBC5_HUMAN N-acetylglucosamine-6-sulfatase OS=Homo sapiens OX=9606 GN=GNS PE=2 SV=1;sp|P15586|GNS_HUMAN N-acetylglucosamine-6-sulfatase OS=Homo sap	A8K6V6	28102000	24183000	23403000	22877000	25484000	29310000	29595000	29808000	29606000	27854000	28001000	0			24.7442	24.5275	24.4802	24.4474	24.6031	24.8049	24.8189	24.8292	24.8194	24.7314	24.739	A8K6V6	0.25093		A8K6V6	0.240274	24.6806	3.57564	0.00095331	0.0197102	-0.932501	tr|A8K6V6|A8K6V6_HUMAN N-acetylglucosamine-6-sulfatase OS=Homo sapiens OX=9606 PE=2 SV=1;tr|A0A024RBC5|A0A024RBC5_HUMAN N-acetylglucosamine-6-sulfatase OS=Homo sapiens OX=9606 GN=GNS PE=2 SV=1;sp|P15586|GNS_HUMAN N-acetylglucosamine-6-sulfatase OS=Homo sap				A8K6V6	0.240274	24.6806	0
4953	163;1444;1806;2334;6940;12252;14172;14518;25934;25935;29203;29318;29319;31579;32029;33731;40101;45088;49680;52885;57221;67265	V9HW56;P67936;B4DVY2;B4DTB1	Tropomyosin alpha-4 chain	HEL-S-108;TPM4	tr|V9HW56|V9HW56_HUMAN Epididymis secretory protein Li 108 OS=Homo sapiens OX=9606 GN=HEL-S-108 PE=2 SV=1;sp|P67936|TPM4_HUMAN Tropomyosin alpha-4 chain OS=Homo sapiens OX=9606 GN=TPM4 PE=1 SV=3;tr|B4DVY2|B4DVY2_HUMAN cDNA FLJ54184, highly similar to Tropo	V9HW56	91824000	76898000	74124000	70892000	80232000	89821000	96918000	93525000	92631000	90758000	79387000	0			26.4524	26.1964	26.1434	26.0791	26.2577	26.4205	26.5303	26.4789	26.465	26.4355	26.2424	V9HW56	0.248192		V9HW56	0.240224	26.3459	3.47124	0.00128407	0.023677	-1.20909	tr|V9HW56|V9HW56_HUMAN Epididymis secretory protein Li 108 OS=Homo sapiens OX=9606 GN=HEL-S-108 PE=2 SV=1;sp|P67936|TPM4_HUMAN Tropomyosin alpha-4 chain OS=Homo sapiens OX=9606 GN=TPM4 PE=1 SV=3;tr|B4DVY2|B4DVY2_HUMAN cDNA FLJ54184, highly similar to Tropo				V9HW56	0.240224	26.3459	0
33	16199;62188	Q9UBN7;B4DZH6;A0A024QZ26;Q9NSW6;B4DZN1;A0A2R8YDE6;A0A2R8YD35;Q9NZS3;B3KT76;B3KVK5;B3KNA1;A0A2R8Y5Z4;B3KY98;B4DJ18;E7EPS2;A6NDI8;E7ER52;E7EP63;Q9BRX7;C9J172;B3KMC3	Histone deacetylase 6	HDAC6;DKFZp566E044	sp|Q9UBN7|HDAC6_HUMAN Histone deacetylase 6 OS=Homo sapiens OX=9606 GN=HDAC6 PE=1 SV=2;tr|B4DZH6|B4DZH6_HUMAN cDNA FLJ56474, highly similar to Histone deacetylase 6 OS=Homo sapiens OX=9606 PE=2 SV=1;tr|A0A024QZ26|A0A024QZ26_HUMAN Histone deacetylase 6, iso	Q9UBN7	9589000	9878300	8222100	7398000	10022000	10755000	11138000	10620000	9845800	10593000	10196000	0			23.1929	23.2358	22.9711	22.8187	23.2567	23.3585	23.409	23.3403	23.2311	23.3366	23.2815	Q9UBN7	0.280452		Q9UBN7	0.240046	23.2151	3.21812	0.00260303	0.0349092	-1.86169	sp|Q9UBN7|HDAC6_HUMAN Histone deacetylase 6 OS=Homo sapiens OX=9606 GN=HDAC6 PE=1 SV=2;tr|B4DZH6|B4DZH6_HUMAN cDNA FLJ56474, highly similar to Histone deacetylase 6 OS=Homo sapiens OX=9606 PE=2 SV=1;tr|A0A024QZ26|A0A024QZ26_HUMAN Histone deacetylase 6, iso				Q9UBN7	0.240046	23.2151	0
4282	5811;21190	O75061;S4R305	Putative tyrosine-protein phosphatase auxilin	DNAJC6	sp|O75061|AUXI_HUMAN Putative tyrosine-protein phosphatase auxilin OS=Homo sapiens OX=9606 GN=DNAJC6 PE=1 SV=3;tr|S4R305|S4R305_HUMAN Putative tyrosine-protein phosphatase auxilin (Fragment) OS=Homo sapiens OX=9606 GN=DNAJC6 PE=1 SV=1	O75061	1397300	1480000	1229200	1154300	1605500	1643500	1629600	1664400	1469800	1651900	1341900	0			20.4142	20.4972	20.2293	20.1386	20.6146	20.6483	20.6361	20.6666	20.4872	20.6557	20.3559	O75061	0.298961		O75061	0.240006	20.4988	3.19134	0.00280126	0.0359159	-1.92914	sp|O75061|AUXI_HUMAN Putative tyrosine-protein phosphatase auxilin OS=Homo sapiens OX=9606 GN=DNAJC6 PE=1 SV=3;tr|S4R305|S4R305_HUMAN Putative tyrosine-protein phosphatase auxilin (Fragment) OS=Homo sapiens OX=9606 GN=DNAJC6 PE=1 SV=1				O75061	0.240006	20.4988	0
6604	2974;12743;16726;31640;32047;40726;45611;48476;67282	Q9NQZ2	Something about silencing protein 10	UTP3	sp|Q9NQZ2|SAS10_HUMAN Something about silencing protein 10 OS=Homo sapiens OX=9606 GN=UTP3 PE=1 SV=1	Q9NQZ2	5771700	5412600	4828300	4717100	5595000	6111800	6513000	6057400	6162000	6150800	6751800	0			22.4606	22.3679	22.2031	22.1695	22.4157	22.5432	22.6349	22.5303	22.555	22.5523	22.6868	Q9NQZ2	0.262875		Q9NQZ2	0.239784	22.4432	3.52015	0.00111735	0.0216668	-1.08004	sp|Q9NQZ2|SAS10_HUMAN Something about silencing protein 10 OS=Homo sapiens OX=9606 GN=UTP3 PE=1 SV=1				Q9NQZ2	0.239784	22.4432	0
967	45799;51121	B4E2D4;R4GND3;A2BDE7;A0A024RBB0;Q8WV24	Pleckstrin homology-like domain family A member 1	PHLDA1	tr|B4E2D4|B4E2D4_HUMAN cDNA FLJ61065, highly similar to Pleckstrin homology-like domain family A member 1 OS=Homo sapiens OX=9606 PE=2 SV=1;tr|R4GND3|R4GND3_HUMAN Pleckstrin homology-like domain family A member 1 OS=Homo sapiens OX=9606 GN=PHLDA1 PE=1 SV=1	B4E2D4	1960500	1889600	1624800	1404100	1577100	1754600	1972100	2146600	2041700	2017100	1990000	0			20.9028	20.8497	20.6318	20.4212	20.5888	20.7427	20.9113	21.0336	20.9613	20.9439	20.9243	B4E2D4	0.217191		B4E2D4	0.239698	20.7987	3.10466	0.00354552	0.039738	-2.1452	tr|B4E2D4|B4E2D4_HUMAN cDNA FLJ61065, highly similar to Pleckstrin homology-like domain family A member 1 OS=Homo sapiens OX=9606 PE=2 SV=1;tr|R4GND3|R4GND3_HUMAN Pleckstrin homology-like domain family A member 1 OS=Homo sapiens OX=9606 GN=PHLDA1 PE=1 SV=1				B4E2D4	0.239698	20.7987	0
3098	2341;4577;23000;24626;25312;25313;34359;38146;40961;44149;51506;54679;54680;65956	B4DKQ5;O60784;B4DJ44;B3KUF5;B0QY01;B3KUU1;V9GYF4;B0QY02;Q6UW50;V9GZ68;H7BYN7;F8WB30;F8WAW7;F8WE29;F8WBB0	Target of Myb protein 1	TOM1	tr|B4DKQ5|B4DKQ5_HUMAN cDNA FLJ54710, highly similar to Target of Myb protein 1 OS=Homo sapiens OX=9606 PE=2 SV=1;sp|O60784|TOM1_HUMAN Target of Myb protein 1 OS=Homo sapiens OX=9606 GN=TOM1 PE=1 SV=2;tr|B4DJ44|B4DJ44_HUMAN cDNA FLJ54716, highly similar to	B4DKQ5	22796000	21182000	20373000	19015000	22421000	24115000	25779000	25531000	24679000	24492000	20666000	0			24.4423	24.3363	24.2802	24.1806	24.4184	24.5234	24.6197	24.6058	24.5568	24.5458	24.3008	B4DKQ5	0.260437		B4DKQ5	0.238738	24.4509	3.59515	0.000901352	0.0190781	-0.880367	tr|B4DKQ5|B4DKQ5_HUMAN cDNA FLJ54710, highly similar to Target of Myb protein 1 OS=Homo sapiens OX=9606 PE=2 SV=1;sp|O60784|TOM1_HUMAN Target of Myb protein 1 OS=Homo sapiens OX=9606 GN=TOM1 PE=1 SV=2;tr|B4DJ44|B4DJ44_HUMAN cDNA FLJ54716, highly similar to				B4DKQ5	0.238738	24.4509	0
6510	24322;44797;48388;53175;58331;59926	Q9H814;B4DPU2	Phosphorylated adapter RNA export protein	PHAX	sp|Q9H814|PHAX_HUMAN Phosphorylated adapter RNA export protein OS=Homo sapiens OX=9606 GN=PHAX PE=1 SV=1	Q9H814	4810400	4695600	3773200	3523100	4661200	4748900	5206900	5150900	5147100	4883000	4685900	0			22.1977	22.1629	21.8474	21.7484	22.1523	22.1792	22.312	22.2964	22.2953	22.2193	22.1599	Q9H814	0.271347		Q9H814	0.238712	22.1411	3.13598	0.00325726	0.0385926	-2.06752	sp|Q9H814|PHAX_HUMAN Phosphorylated adapter RNA export protein OS=Homo sapiens OX=9606 GN=PHAX PE=1 SV=1				Q9H814	0.238712	22.1411	0
87	44197	A0A024QZU7;A0A024QZS3;O14494	Lipid phosphate phosphohydrolase 1	PPAP2A	tr|A0A024QZU7|A0A024QZU7_HUMAN Phosphatidic acid phosphatase type 2A, isoform CRA_b OS=Homo sapiens OX=9606 GN=PPAP2A PE=4 SV=1;tr|A0A024QZS3|A0A024QZS3_HUMAN Phosphatidic acid phosphatase type 2A, isoform CRA_a OS=Homo sapiens OX=9606 GN=PPAP2A PE=4 SV=1;	A0A024QZU7	453330	439680	356440	321160	435000	451760	480240	493980	457690	462730	409230	0			18.7902	18.7461	18.4433	18.2929	18.7307	18.7852	18.8734	18.9141	18.804	18.8198	18.6425	A0A024QZU7	0.271172		A0A024QZU7	0.238666	18.72	3.08583	0.00373018	0.0405953	-2.19166	tr|A0A024QZU7|A0A024QZU7_HUMAN Phosphatidic acid phosphatase type 2A, isoform CRA_b OS=Homo sapiens OX=9606 GN=PPAP2A PE=4 SV=1;tr|A0A024QZS3|A0A024QZS3_HUMAN Phosphatidic acid phosphatase type 2A, isoform CRA_a OS=Homo sapiens OX=9606 GN=PPAP2A PE=4 SV=1;				A0A024QZU7	0.238666	18.72	0
2452	9074;12375;23647	A8K4Q6;O14867;C9JMP6;C9IYR0	Transcription regulator protein BACH1	BACH1	tr|A8K4Q6|A8K4Q6_HUMAN cDNA FLJ77930, highly similar to Homo sapiens BTB and CNC homology 1, basic leucine zipper transcription factor 1, transcript variant 2, mRNA OS=Homo sapiens OX=9606 PE=2 SV=1;sp|O14867|BACH1_HUMAN Transcription regulator protein BAC	A8K4Q6	447230	395790	388040	372900	426590	466940	553070	468450	503350	410220	423600	0			18.7707	18.5944	18.5659	18.5084	18.7025	18.8329	19.0771	18.8375	18.9412	18.646	18.6923	A8K4Q6	0.257122		A8K4Q6	0.23859	18.7477	3.25451	0.00235492	0.0335167	-1.76953	tr|A8K4Q6|A8K4Q6_HUMAN cDNA FLJ77930, highly similar to Homo sapiens BTB and CNC homology 1, basic leucine zipper transcription factor 1, transcript variant 2, mRNA OS=Homo sapiens OX=9606 PE=2 SV=1;sp|O14867|BACH1_HUMAN Transcription regulator protein BAC				A8K4Q6	0.23859	18.7477	0
2375	7463;21559;37858;40328;52969	Q8IYS3;Q53FW7;B2R8X4;A8IE48;Q06546	GA-binding protein alpha chain	GABPA	tr|Q8IYS3|Q8IYS3_HUMAN GA binding protein transcription factor, alpha subunit 60kDa OS=Homo sapiens OX=9606 GN=GABPA PE=2 SV=1;tr|Q53FW7|Q53FW7_HUMAN GA binding protein transcription factor, alpha subunit (60kD) variant (Fragment) OS=Homo sapiens OX=9606 P	Q8IYS3	3256300	3090000	2879800	2729300	3451000	3414200	3945900	3568700	3658900	3543000	3420500	0			21.6348	21.5592	21.4575	21.3801	21.7186	21.7031	21.9119	21.767	21.803	21.7565	21.7058	Q8IYS3	0.280401		Q8IYS3	0.238266	21.6692	3.41185	0.00151871	0.026465	-1.36457	tr|Q8IYS3|Q8IYS3_HUMAN GA binding protein transcription factor, alpha subunit 60kDa OS=Homo sapiens OX=9606 GN=GABPA PE=2 SV=1;tr|Q53FW7|Q53FW7_HUMAN GA binding protein transcription factor, alpha subunit (60kD) variant (Fragment) OS=Homo sapiens OX=9606 P				Q8IYS3	0.238266	21.6692	0
5339	21453;29409;44547;61273	Q3ZCW2;U3KQ88	Galectin-related protein;Galectin	LGALSL	sp|Q3ZCW2|LEGL_HUMAN Galectin-related protein OS=Homo sapiens OX=9606 GN=LGALSL PE=1 SV=2;tr|U3KQ88|U3KQ88_HUMAN Galectin (Fragment) OS=Homo sapiens OX=9606 GN=LGALSL PE=1 SV=1	Q3ZCW2	737230	686990	672300	630690	769130	807830	936970	799130	873600	713420	567330	0			19.4917	19.3899	19.3588	19.2666	19.5529	19.6237	19.8376	19.6081	19.7366	19.4444	19.1138	Q3ZCW2	0.27333		Q3ZCW2	0.238106	19.531	3.27173	0.00224553	0.0325316	-1.72572	sp|Q3ZCW2|LEGL_HUMAN Galectin-related protein OS=Homo sapiens OX=9606 GN=LGALSL PE=1 SV=2;tr|U3KQ88|U3KQ88_HUMAN Galectin (Fragment) OS=Homo sapiens OX=9606 GN=LGALSL PE=1 SV=1				Q3ZCW2	0.238106	19.531	0
3330	18729;29320;64921	B7Z3J7;G3XAN1;B7Z970;Q9NV88;H0YBH8;E5RG70	Integrator complex subunit 9	INTS9	tr|B7Z3J7|B7Z3J7_HUMAN cDNA FLJ54358, highly similar to Homo sapiens related to CPSF subunits 74 kDa (RC74), mRNA OS=Homo sapiens OX=9606 PE=2 SV=1;tr|G3XAN1|G3XAN1_HUMAN Integrator complex subunit 9 OS=Homo sapiens OX=9606 GN=INTS9 PE=1 SV=1;tr|B7Z970|B7Z	B7Z3J7	274300	286250	218430	191260	311870	302110	308650	298640	287790	290670	307480	0			18.0654	18.1269	17.7368	17.5452	18.2506	18.2047	18.2356	18.1881	18.1347	18.149	18.2301	B7Z3J7	0.313833		B7Z3J7	0.23743	18.0637	2.74424	0.00912975	0.0564418	-3.00399	tr|B7Z3J7|B7Z3J7_HUMAN cDNA FLJ54358, highly similar to Homo sapiens related to CPSF subunits 74 kDa (RC74), mRNA OS=Homo sapiens OX=9606 PE=2 SV=1;tr|G3XAN1|G3XAN1_HUMAN Integrator complex subunit 9 OS=Homo sapiens OX=9606 GN=INTS9 PE=1 SV=1;tr|B7Z970|B7Z				B7Z3J7	0.23743	18.0637	0
4996	145;11283;18622;23796;26731;35910;44593;50455;63779	Q2NLD4;Q00577;Q2NLC9;Q56A79;Q5U0P9;A0A494C0H6	Transcriptional activator protein Pur-alpha	PURA	tr|Q2NLD4|Q2NLD4_HUMAN PURA protein (Fragment) OS=Homo sapiens OX=9606 GN=PURA PE=2 SV=1;sp|Q00577|PURA_HUMAN Transcriptional activator protein Pur-alpha OS=Homo sapiens OX=9606 GN=PURA PE=1 SV=2;tr|Q2NLC9|Q2NLC9_HUMAN PURA protein (Fragment) OS=Homo sapie	Q2NLD4	15105000	13213000	12327000	12049000	14112000	15321000	16692000	15887000	15693000	14937000	14430000	0			23.8485	23.6554	23.5553	23.5224	23.7504	23.869	23.9927	23.9213	23.9036	23.8324	23.7826	Q2NLD4	0.258377		Q2NLD4	0.237378	23.7851	3.43333	0.00142949	0.0253116	-1.30851	tr|Q2NLD4|Q2NLD4_HUMAN PURA protein (Fragment) OS=Homo sapiens OX=9606 GN=PURA PE=2 SV=1;sp|Q00577|PURA_HUMAN Transcriptional activator protein Pur-alpha OS=Homo sapiens OX=9606 GN=PURA PE=1 SV=2;tr|Q2NLC9|Q2NLC9_HUMAN PURA protein (Fragment) OS=Homo sapie				Q2NLD4	0.237378	23.7851	0
2139	110;6128;10605;11542;14608;30432;31645;34459;39659;43048;45534;49087;49955;52867;55077;55708;63041	D6RGI3;A0A384P5S0;D6RER5;Q9NVA2;D6RDU5;H0Y961;Q96KC0;H0Y9G8;D6RDP1;D6R9Y6	Septin-11	2019-09-11	tr|D6RGI3|D6RGI3_HUMAN Septin 11 OS=Homo sapiens OX=9606 GN=SEPTIN11 PE=1 SV=1;tr|A0A384P5S0|A0A384P5S0_HUMAN Epididymis secretory sperm binding protein OS=Homo sapiens OX=9606 PE=2 SV=1;tr|D6RER5|D6RER5_HUMAN Septin 11 OS=Homo sapiens OX=9606 GN=SEPTIN11	D6RGI3	70196000	63834000	60123000	55618000	64990000	71070000	79956000	73775000	75535000	70009000	61677000	0			26.0649	25.9278	25.8414	25.7291	25.9537	26.0827	26.2527	26.1366	26.1706	26.061	25.8782	D6RGI3	0.249957		D6RGI3	0.237374	26.0221	3.43816	0.00141011	0.0252336	-1.29587	tr|D6RGI3|D6RGI3_HUMAN Septin 11 OS=Homo sapiens OX=9606 GN=SEPTIN11 PE=1 SV=1;tr|A0A384P5S0|A0A384P5S0_HUMAN Epididymis secretory sperm binding protein OS=Homo sapiens OX=9606 PE=2 SV=1;tr|D6RER5|D6RER5_HUMAN Septin 11 OS=Homo sapiens OX=9606 GN=SEPTIN11				D6RGI3	0.237374	26.0221	0
613	996;39362;43510	P61970;A0A024R6Y2;H3BRV9	Nuclear transport factor 2	NUTF2	sp|P61970|NTF2_HUMAN Nuclear transport factor 2 OS=Homo sapiens OX=9606 GN=NUTF2 PE=1 SV=1;tr|A0A024R6Y2|A0A024R6Y2_HUMAN Nuclear transport factor 2, isoform CRA_a OS=Homo sapiens OX=9606 GN=NUTF2 PE=4 SV=1;tr|H3BRV9|H3BRV9_HUMAN Nuclear transport factor 2	P61970	4821100	4729400	4283900	3853000	4806800	4969200	5626100	5438900	5109700	5299400	4223100	0			22.2009	22.1732	22.0305	21.8775	22.1967	22.2446	22.4237	22.3749	22.2848	22.3374	22.0099	P61970	0.262524		P61970	0.237304	22.2144	3.39118	0.00160963	0.0271636	-1.41837	sp|P61970|NTF2_HUMAN Nuclear transport factor 2 OS=Homo sapiens OX=9606 GN=NUTF2 PE=1 SV=1;tr|A0A024R6Y2|A0A024R6Y2_HUMAN Nuclear transport factor 2, isoform CRA_a OS=Homo sapiens OX=9606 GN=NUTF2 PE=4 SV=1;tr|H3BRV9|H3BRV9_HUMAN Nuclear transport factor 2				P61970	0.237304	22.2144	0
5043	645;1547;1676;3745;5608;14263;14285;22075;31790;33700;34187;34456;37611;40857;47552;49542;52072	Q05CP8;Q15302;J7M8C2;J7MDF2;A0A2H4FYY8		CCDC6	tr|Q05CP8|Q05CP8_HUMAN CCDC6 protein (Fragment) OS=Homo sapiens OX=9606 GN=CCDC6 PE=2 SV=1	Q05CP8	872880	922080	657640	586680	913610	885000	944340	947550	896160	909240	1180800	0			19.7354	19.8145	19.3269	19.1622	19.8012	19.7553	19.8489	19.8538	19.7734	19.7943	20.1713	Q05CP8	0.295387		Q05CP8	0.237098	19.6866	2.6982	0.0102588	0.0591468	-3.10873	tr|Q05CP8|Q05CP8_HUMAN CCDC6 protein (Fragment) OS=Homo sapiens OX=9606 GN=CCDC6 PE=2 SV=1				Q05CP8	0.237098	19.6866	0
4987	4938;6390;6391;16113;17438;17943;36326;59546;66625	Q6ICQ8;P84095	Rho-related GTP-binding protein RhoG	ARHG;RHOG	tr|Q6ICQ8|Q6ICQ8_HUMAN ARHG protein (Fragment) OS=Homo sapiens OX=9606 GN=ARHG PE=2 SV=1;sp|P84095|RHOG_HUMAN Rho-related GTP-binding protein RhoG OS=Homo sapiens OX=9606 GN=RHOG PE=1 SV=1	Q6ICQ8	13927000	12193000	11621000	10967000	12489000	13769000	15357000	14683000	14286000	13857000	12999000	0			23.7314	23.5395	23.4702	23.3867	23.5741	23.7149	23.8724	23.8076	23.7681	23.7241	23.6319	Q6ICQ8	0.245474		Q6ICQ8	0.237036	23.6589	3.44695	0.00137552	0.0248229	-1.27286	tr|Q6ICQ8|Q6ICQ8_HUMAN ARHG protein (Fragment) OS=Homo sapiens OX=9606 GN=ARHG PE=2 SV=1;sp|P84095|RHOG_HUMAN Rho-related GTP-binding protein RhoG OS=Homo sapiens OX=9606 GN=RHOG PE=1 SV=1				Q6ICQ8	0.237036	23.6589	0
446	2108;4336;13618;20298;21029;25527;25910;27515;29230;31441;39699;41597;44638;54141;57298;60296;60460;63115;63946	Q0QF37;Q75MT9;Q6FHZ0;A0A024R4K3;P40926;G3XAL0;B3KTM1	Malate dehydrogenase;Malate dehydrogenase, mitochondrial	MDH2	tr|Q0QF37|Q0QF37_HUMAN Malate dehydrogenase (Fragment) OS=Homo sapiens OX=9606 GN=MDH2 PE=2 SV=1;tr|Q75MT9|Q75MT9_HUMAN Malate dehydrogenase (Fragment) OS=Homo sapiens OX=9606 GN=MDH2 PE=3 SV=1;tr|Q6FHZ0|Q6FHZ0_HUMAN Malate dehydrogenase OS=Homo sapiens OX	Q0QF37	89222000	81469000	73122000	67764000	83033000	88691000	96078000	93486000	93291000	91422000	156870000	0			26.4109	26.2797	26.1238	26.014	26.3072	26.4023	26.5177	26.4782	26.4752	26.446	27.225	Q0QF37	0.256782		Q0QF37	0.23677	26.3455	3.35849	0.00176406	0.0281824	-1.50306	tr|Q0QF37|Q0QF37_HUMAN Malate dehydrogenase (Fragment) OS=Homo sapiens OX=9606 GN=MDH2 PE=2 SV=1;tr|Q75MT9|Q75MT9_HUMAN Malate dehydrogenase (Fragment) OS=Homo sapiens OX=9606 GN=MDH2 PE=3 SV=1;tr|Q6FHZ0|Q6FHZ0_HUMAN Malate dehydrogenase OS=Homo sapiens OX				Q0QF37	0.23677	26.3455	0
2741	32220;49049;53197	Q53FM2;B2R9C5;Q96IY1;Q5SY76;Q5SY74;B4E071	Kinetochore-associated protein NSL1 homolog	C1orf48;NSL1	tr|Q53FM2|Q53FM2_HUMAN Chromosome 1 open reading frame 48 variant (Fragment) OS=Homo sapiens OX=9606 GN=C1orf48 PE=2 SV=1;tr|B2R9C5|B2R9C5_HUMAN cDNA, FLJ94330 OS=Homo sapiens OX=9606 PE=2 SV=1;sp|Q96IY1|NSL1_HUMAN Kinetochore-associated protein NSL1 homol	Q53FM2	538350	532530	444770	391740	513870	546010	609680	561500	538200	579650	539290	0			19.0382	19.0225	18.7627	18.5795	18.971	19.0586	19.2177	19.0989	19.0378	19.1448	19.0407	Q53FM2	0.260825		Q53FM2	0.236764	18.9932	3.13331	0.00328091	0.0387259	-2.07416	tr|Q53FM2|Q53FM2_HUMAN Chromosome 1 open reading frame 48 variant (Fragment) OS=Homo sapiens OX=9606 GN=C1orf48 PE=2 SV=1;tr|B2R9C5|B2R9C5_HUMAN cDNA, FLJ94330 OS=Homo sapiens OX=9606 PE=2 SV=1;sp|Q96IY1|NSL1_HUMAN Kinetochore-associated protein NSL1 homol				Q53FM2	0.236764	18.9932	0
1136	8305	C9JTB6;A0A1W2PQL2;A0A1W2PQ65;A0A1W2PS30;A0A1X7SBW1;A0A024RDN7;A0A1W2PP71;Q96MP8	BTB/POZ domain-containing protein KCTD7	KCTD7	tr|C9JTB6|C9JTB6_HUMAN BTB/POZ domain-containing protein KCTD7 (Fragment) OS=Homo sapiens OX=9606 GN=KCTD7 PE=1 SV=2;tr|A0A1W2PQL2|A0A1W2PQL2_HUMAN BTB/POZ domain-containing protein KCTD7 OS=Homo sapiens OX=9606 GN=KCTD7 PE=1 SV=1;tr|A0A1W2PQ65|A0A1W2PQ65_	C9JTB6	340610	347950	302950	304310	341890	353370	386590	393830	420500	374950	415150	0			18.3778	18.4085	18.2087	18.2152	18.3832	18.4308	18.5604	18.5872	18.6818	18.5163	18.6633	C9JTB6	0.252767		C9JTB6	0.236642	18.437	3.48069	0.00125012	0.0233007	-1.18424	tr|C9JTB6|C9JTB6_HUMAN BTB/POZ domain-containing protein KCTD7 (Fragment) OS=Homo sapiens OX=9606 GN=KCTD7 PE=1 SV=2;tr|A0A1W2PQL2|A0A1W2PQL2_HUMAN BTB/POZ domain-containing protein KCTD7 OS=Homo sapiens OX=9606 GN=KCTD7 PE=1 SV=1;tr|A0A1W2PQ65|A0A1W2PQ65_				C9JTB6	0.236642	18.437	0
2960	2533;3191;3875;4699;4700;7556;8276;8547;11504;13858;14766;16852;20092;21181;26534;26919;28329;28398;28632;30187;30188;30820;33629;39343;41207;45184;45586;47271;47743;56625;57344;57529;59856;62292;66720;66828;67317	K7EKE6;B3KU28;K7EJE8;B3KXS5;P36776;Q2VPA0;E5KMI6;B4DPX0;A4VCH6;K7ER27;K7ERR6;K7ER56;K7EQF8	Lon protease homolog, mitochondrial;Lon protease homolog	LONP1	tr|K7EKE6|K7EKE6_HUMAN Lon protease homolog, mitochondrial OS=Homo sapiens OX=9606 GN=LONP1 PE=1 SV=1;tr|B3KU28|B3KU28_HUMAN Lon protease homolog, mitochondrial OS=Homo sapiens OX=9606 GN=LONP1 PE=2 SV=1;tr|K7EJE8|K7EJE8_HUMAN Lon protease homolog, mitocho	K7EKE6	47488000	42895000	41120000	38066000	43669000	47185000	51476000	50816000	49563000	51535000	65360000	0			25.5011	25.3543	25.2933	25.182	25.3801	25.4918	25.6174	25.5988	25.5628	25.6191	25.9619	K7EKE6	0.245287		K7EKE6	0.2358	25.4601	3.49316	0.00120658	0.0226699	-1.15136	tr|K7EKE6|K7EKE6_HUMAN Lon protease homolog, mitochondrial OS=Homo sapiens OX=9606 GN=LONP1 PE=1 SV=1;tr|B3KU28|B3KU28_HUMAN Lon protease homolog, mitochondrial OS=Homo sapiens OX=9606 GN=LONP1 PE=2 SV=1;tr|K7EJE8|K7EJE8_HUMAN Lon protease homolog, mitocho				K7EKE6	0.2358	25.4601	0
6156	1298;3749;15940;62416	Q96BZ8	Leukocyte receptor cluster member 1	LENG1	sp|Q96BZ8|LENG1_HUMAN Leukocyte receptor cluster member 1 OS=Homo sapiens OX=9606 GN=LENG1 PE=1 SV=1	Q96BZ8	658710	600030	544110	530060	648710	657390	803820	675380	676990	692800	625630	0			19.3293	19.1947	19.0535	19.0158	19.3072	19.3264	19.6165	19.3653	19.3688	19.4021	19.255	Q96BZ8	0.267493		Q96BZ8	0.235716	19.298	3.24917	0.0023899	0.0336102	-1.7831	sp|Q96BZ8|LENG1_HUMAN Leukocyte receptor cluster member 1 OS=Homo sapiens OX=9606 GN=LENG1 PE=1 SV=1				Q96BZ8	0.235716	19.298	0
2272	689;3093;5305;5783;24793;24860;30558;30624;30637;32189;51650;52287	Q4VB24;A3R0T8;P10412;A3R0T7;B2R984	Histone H1.4	HIST1H1E	tr|Q4VB24|Q4VB24_HUMAN Histone cluster 1, H1e OS=Homo sapiens OX=9606 GN=HIST1H1E PE=2 SV=1;tr|A3R0T8|A3R0T8_HUMAN Histone 1, H1e OS=Homo sapiens OX=9606 GN=HIST1H1E PE=2 SV=1;sp|P10412|H14_HUMAN Histone H1.4 OS=Homo sapiens OX=9606 GN=HIST1H1E PE=1 SV=2;t	Q4VB24	213200000	151320000	158230000	150000000	157740000	194550000	179750000	193000000	229960000	175880000	157940000	0			27.6676	27.173	27.2374	27.1604	27.233	27.5356	27.4214	27.524	27.7768	27.39	27.2348	Q4VB24	0.219943		Q4VB24	0.235274	27.4119	2.88138	0.00641322	0.0494372	-2.6851	tr|Q4VB24|Q4VB24_HUMAN Histone cluster 1, H1e OS=Homo sapiens OX=9606 GN=HIST1H1E PE=2 SV=1;tr|A3R0T8|A3R0T8_HUMAN Histone 1, H1e OS=Homo sapiens OX=9606 GN=HIST1H1E PE=2 SV=1;sp|P10412|H14_HUMAN Histone H1.4 OS=Homo sapiens OX=9606 GN=HIST1H1E PE=1 SV=2;t				Q4VB24	0.235274	27.4119	0
4595	2234;10190;14325;19101;37437;38124;41306;41363;43631;52133;56844;60706;60860;64778	P23497;B4E2B9;E9PHV6;Q53TD0;C9JBL0;U5Y1J8;H7BYP4;U5Y3L1;Q9H930;Q4ZG64	Nuclear autoantigen Sp-100	SP100	sp|P23497|SP100_HUMAN Nuclear autoantigen Sp-100 OS=Homo sapiens OX=9606 GN=SP100 PE=1 SV=3;tr|B4E2B9|B4E2B9_HUMAN cDNA FLJ61544, highly similar to Nuclear autoantigen Sp-100 OS=Homo sapiens OX=9606 PE=2 SV=1;tr|E9PHV6|E9PHV6_HUMAN Nuclear autoantigen Sp-1	P23497	25414000	23493000	21700000	21121000	24001000	27008000	28189000	27650000	26927000	26183000	22313000	0			24.5991	24.4857	24.3712	24.3322	24.5166	24.6869	24.7486	24.7208	24.6825	24.6421	24.4114	P23497	0.249142		P23497	0.235234	24.5786	3.53381	0.00107462	0.0211003	-1.04383	sp|P23497|SP100_HUMAN Nuclear autoantigen Sp-100 OS=Homo sapiens OX=9606 GN=SP100 PE=1 SV=3;tr|B4E2B9|B4E2B9_HUMAN cDNA FLJ61544, highly similar to Nuclear autoantigen Sp-100 OS=Homo sapiens OX=9606 PE=2 SV=1;tr|E9PHV6|E9PHV6_HUMAN Nuclear autoantigen Sp-1				P23497	0.235234	24.5786	0
4118	283;5448;13547;16126;17215;20247;32754;38562;45863;47390;48360;56703	O00273;Q53HN4;K7ERT1	DNA fragmentation factor subunit alpha	DFFA	sp|O00273|DFFA_HUMAN DNA fragmentation factor subunit alpha OS=Homo sapiens OX=9606 GN=DFFA PE=1 SV=1;tr|Q53HN4|Q53HN4_HUMAN DNAation factor, 45kDa, alpha polypeptide isoform 1 variant (Fragment) OS=Homo sapiens OX=9606 PE=2 SV=1	O00273	13543000	12931000	11449000	10596000	12621000	13358000	14567000	14892000	14426000	14493000	13171000	0			23.691	23.6243	23.4487	23.337	23.5893	23.6712	23.7962	23.828	23.7822	23.7889	23.6509	O00273	0.248012		O00273	0.235204	23.6557	3.37224	0.00169746	0.0277459	-1.46749	sp|O00273|DFFA_HUMAN DNA fragmentation factor subunit alpha OS=Homo sapiens OX=9606 GN=DFFA PE=1 SV=1;tr|Q53HN4|Q53HN4_HUMAN DNAation factor, 45kDa, alpha polypeptide isoform 1 variant (Fragment) OS=Homo sapiens OX=9606 PE=2 SV=1				O00273	0.235204	23.6557	0
4319	364;2256;38996;43357	O75607	Nucleoplasmin-3	NPM3	sp|O75607|NPM3_HUMAN Nucleoplasmin-3 OS=Homo sapiens OX=9606 GN=NPM3 PE=1 SV=3	O75607	4351100	3818600	3538900	3549100	4002900	4634300	4304300	4472900	4036900	5236300	4168100	0			22.0529	21.8646	21.7549	21.759	21.9326	22.1439	22.0373	22.0928	21.9448	22.3201	21.991	O75607	0.249936		O75607	0.234986	21.9903	3.21958	0.00259265	0.0349092	-1.85802	sp|O75607|NPM3_HUMAN Nucleoplasmin-3 OS=Homo sapiens OX=9606 GN=NPM3 PE=1 SV=3				O75607	0.234986	21.9903	0
1023	9458;48223;59616	A8K6P5;A0A024RC06;Q13496;B7Z499;C9J2A2	Myotubularin	MTM1	tr|A8K6P5|A8K6P5_HUMAN cDNA FLJ76887, highly similar to Homo sapiens myotubularin 1 (MTM1), mRNA OS=Homo sapiens OX=9606 PE=2 SV=1;tr|A0A024RC06|A0A024RC06_HUMAN Myotubularin 1, isoform CRA_a OS=Homo sapiens OX=9606 GN=MTM1 PE=4 SV=1;sp|Q13496|MTM1_HUMAN M	A8K6P5	1441200	1278500	1225400	1172800	1393400	1417700	1646900	1567300	1497800	1518800	1396700	0			20.4588	20.286	20.2248	20.1615	20.4102	20.4351	20.6513	20.5799	20.5144	20.5345	20.4136	A8K6P5	0.260237		A8K6P5	0.234762	20.4257	3.39645	0.00158595	0.0269958	-1.40466	tr|A8K6P5|A8K6P5_HUMAN cDNA FLJ76887, highly similar to Homo sapiens myotubularin 1 (MTM1), mRNA OS=Homo sapiens OX=9606 PE=2 SV=1;tr|A0A024RC06|A0A024RC06_HUMAN Myotubularin 1, isoform CRA_a OS=Homo sapiens OX=9606 GN=MTM1 PE=4 SV=1;sp|Q13496|MTM1_HUMAN M				A8K6P5	0.234762	20.4257	0
2142	7021;9446;9447;15266;15835;31783;32599;34637;37123;37124;49362;52863;63807	A0A384P5U2;P39687;H0YN26;Q6PKH8;Q08AJ6;Q3KPI8;Q1AHP8;O95626;O43423;H7BZ09	Acidic leucine-rich nuclear phosphoprotein 32 family member A	ANP32A	tr|A0A384P5U2|A0A384P5U2_HUMAN Epididymis secretory sperm binding protein OS=Homo sapiens OX=9606 PE=2 SV=1;sp|P39687|AN32A_HUMAN Acidic leucine-rich nuclear phosphoprotein 32 family member A OS=Homo sapiens OX=9606 GN=ANP32A PE=1 SV=1;tr|H0YN26|H0YN26_HUM	A0A384P5U2	31200000	28125000	25105000	23223000	27074000	29477000	32891000	32375000	31478000	31624000	29470000	0			24.895	24.7453	24.5815	24.469	24.6904	24.8131	24.9712	24.9484	24.9078	24.9145	24.8127	A0A384P5U2	0.238277		A0A384P5U2	0.234742	24.7936	3.28581	0.00215971	0.0319847	-1.68981	tr|A0A384P5U2|A0A384P5U2_HUMAN Epididymis secretory sperm binding protein OS=Homo sapiens OX=9606 PE=2 SV=1;sp|P39687|AN32A_HUMAN Acidic leucine-rich nuclear phosphoprotein 32 family member A OS=Homo sapiens OX=9606 GN=ANP32A PE=1 SV=1;tr|H0YN26|H0YN26_HUM				A0A384P5U2	0.234742	24.7936	0
641	11303;12674;22791;34274;36152;36985;40402;44006;49334;53935;59083;60070;66562	A0A024R7A8;P15121;Q59EL5;E9PCX2;E9PEF9;O15289;A4D1P0;C9JRZ8	Aldose reductase	AKR1B1	tr|A0A024R7A8|A0A024R7A8_HUMAN Aldo-keto reductase family 1, member B1 (Aldose reductase), isoform CRA_a OS=Homo sapiens OX=9606 GN=AKR1B1 PE=4 SV=1;sp|P15121|ALDR_HUMAN Aldo-keto reductase family 1 member B1 OS=Homo sapiens OX=9606 GN=AKR1B1 PE=1 SV=3;tr|	A0A024R7A8	35666000	36582000	30305000	26698000	35342000	37939000	39828000	40005000	37291000	37332000	50768000	0			25.088	25.1246	24.853	24.6702	25.0749	25.1772	25.2473	25.2537	25.1523	25.1539	25.5974	A0A024R7A8	0.262884		A0A024R7A8	0.234706	25.0795	3.15252	0.00311413	0.03783	-2.02632	tr|A0A024R7A8|A0A024R7A8_HUMAN Aldo-keto reductase family 1, member B1 (Aldose reductase), isoform CRA_a OS=Homo sapiens OX=9606 GN=AKR1B1 PE=4 SV=1;sp|P15121|ALDR_HUMAN Aldo-keto reductase family 1 member B1 OS=Homo sapiens OX=9606 GN=AKR1B1 PE=1 SV=3;tr|				A0A024R7A8	0.234706	25.0795	0
6928	39651;43244	Q9Y4K3	TNF receptor-associated factor 6	TRAF6	sp|Q9Y4K3|TRAF6_HUMAN TNF receptor-associated factor 6 OS=Homo sapiens OX=9606 GN=TRAF6 PE=1 SV=1	Q9Y4K3	1339000	1382500	1074000	986720	1371000	1367600	1507500	1418400	1454000	1425200	1630800	0			20.3527	20.3988	20.0346	19.9123	20.3868	20.3832	20.5237	20.4358	20.4716	20.4427	20.6371	Q9Y4K3	0.276817		Q9Y4K3	0.234378	20.3342	2.99878	0.00470845	0.0438145	-2.4043	sp|Q9Y4K3|TRAF6_HUMAN TNF receptor-associated factor 6 OS=Homo sapiens OX=9606 GN=TRAF6 PE=1 SV=1				Q9Y4K3	0.234378	20.3342	0
4502	5328;5609;9654;12222;24266;28520;33536;39015;39115;45594;55745;58112;61696	P11182;B4E1Q7;Q5VVL7	Lipoamide acyltransferase component of branched-chain alpha-keto acid dehydrogenase complex, mitochondrial	DBT	sp|P11182|ODB2_HUMAN Lipoamide acyltransferase component of branched-chain alpha-keto acid dehydrogenase complex, mitochondrial OS=Homo sapiens OX=9606 GN=DBT PE=1 SV=3;tr|B4E1Q7|B4E1Q7_HUMAN cDNA FLJ57294, highly similar to Lipoamide acyltransferase compo	P11182	9710500	8566800	8540800	8034900	9403500	10530000	10997000	10245000	10096000	10095000	11016000	0			23.2111	23.0303	23.0259	22.9379	23.1648	23.328	23.3906	23.2884	23.2673	23.2671	23.3931	P11182	0.256985		P11182	0.234292	23.1911	3.49246	0.00120901	0.0226699	-1.15323	sp|P11182|ODB2_HUMAN Lipoamide acyltransferase component of branched-chain alpha-keto acid dehydrogenase complex, mitochondrial OS=Homo sapiens OX=9606 GN=DBT PE=1 SV=3;tr|B4E1Q7|B4E1Q7_HUMAN cDNA FLJ57294, highly similar to Lipoamide acyltransferase compo				P11182	0.234292	23.1911	0
5165	9519;10191;12536;19762;20687;22063;25343;27136;27455;28072;30273;32861;42996;42997;47012;49693;54875;61710;63482;67674	Q5T0F3;Q13823;B4DPI9;H0YG10	Nucleolar GTP-binding protein 2	GNL2	tr|Q5T0F3|Q5T0F3_HUMAN Nucleolar GTP-binding protein 2 OS=Homo sapiens OX=9606 GN=GNL2 PE=2 SV=1;sp|Q13823|NOG2_HUMAN Nucleolar GTP-binding protein 2 OS=Homo sapiens OX=9606 GN=GNL2 PE=1 SV=1;tr|B4DPI9|B4DPI9_HUMAN cDNA FLJ54985, highly similar to Nucleola	Q5T0F3	53563000	45925000	44757000	42926000	46873000	51856000	57908000	56598000	53186000	55196000	49265000	0			25.6747	25.4528	25.4156	25.3554	25.4823	25.628	25.7873	25.7542	25.6645	25.7181	25.5541	Q5T0F3	0.235806		Q5T0F3	0.23428	25.5933	3.43646	0.0014169	0.0252775	-1.30032	tr|Q5T0F3|Q5T0F3_HUMAN Nucleolar GTP-binding protein 2 OS=Homo sapiens OX=9606 GN=GNL2 PE=2 SV=1;sp|Q13823|NOG2_HUMAN Nucleolar GTP-binding protein 2 OS=Homo sapiens OX=9606 GN=GNL2 PE=1 SV=1;tr|B4DPI9|B4DPI9_HUMAN cDNA FLJ54985, highly similar to Nucleola				Q5T0F3	0.23428	25.5933	0
4541	6187;15194;63527	P16383;A4UHR0;B3KUM5;Q9BVX3	GC-rich sequence DNA-binding factor 2	GCFC2;C2orf3	sp|P16383|GCFC2_HUMAN GC-rich sequence DNA-binding factor 2 OS=Homo sapiens OX=9606 GN=GCFC2 PE=1 SV=2;tr|A4UHR0|A4UHR0_HUMAN C2ORF3 variant 3 OS=Homo sapiens OX=9606 GN=C2orf3 PE=2 SV=1;tr|B3KUM5|B3KUM5_HUMAN cDNA FLJ40245 fis, clone TESTI2023968, highly	P16383	105640	92323	89612	82024	94113	102410	118800	109580	109700	103810	98500	0			16.6888	16.4944	16.4514	16.3238	16.5221	16.644	16.8582	16.7416	16.7432	16.6636	16.5878	P16383	0.240528		P16383	0.234024	16.6131	3.34853	0.00181389	0.028746	-1.5288	sp|P16383|GCFC2_HUMAN GC-rich sequence DNA-binding factor 2 OS=Homo sapiens OX=9606 GN=GCFC2 PE=1 SV=2;tr|A4UHR0|A4UHR0_HUMAN C2ORF3 variant 3 OS=Homo sapiens OX=9606 GN=C2orf3 PE=2 SV=1;tr|B3KUM5|B3KUM5_HUMAN cDNA FLJ40245 fis, clone TESTI2023968, highly				P16383	0.234024	16.6131	0
4003	10128;11861;13199;15139;18894;19576;19606;19997;23226;28417;30968;31759;36850;38470;42625;46157;46403;47821;49055;51226;52898;56587;57125;62284;62807;67485	J3KPM9;A5D905;H7BZB5;D3DPI9;B4DVP7;Q53S87;B4DV04;Q14765	Signal transducer and activator of transcription	STAT1	tr|J3KPM9|J3KPM9_HUMAN Signal transducer and activator of transcription OS=Homo sapiens OX=9606 GN=STAT1 PE=1 SV=1	J3KPM9	472350	412920	376450	390110	396630	463960	530720	455130	526140	433530	412700	0			18.8495	18.6555	18.5221	18.5735	18.5974	18.8236	19.0176	18.7959	19.0051	18.7258	18.6547	J3KPM9	0.223447		J3KPM9	0.233992	18.7566	3.23234	0.00250329	0.0342013	-1.82575	tr|J3KPM9|J3KPM9_HUMAN Signal transducer and activator of transcription OS=Homo sapiens OX=9606 GN=STAT1 PE=1 SV=1				J3KPM9	0.233992	18.7566	0
4645	25703;38197;38198;38350;42941;43570;45257;59319;67501	V9HWI1;P30043;M0R192;A0A2R8YEP4;A0A2R8Y7Y9;M0QZL1	Flavin reductase (NADPH)	HEL-S-10;BLVRB	tr|V9HWI1|V9HWI1_HUMAN Epididymis secretory protein Li 10 OS=Homo sapiens OX=9606 GN=HEL-S-10 PE=2 SV=1;sp|P30043|BLVRB_HUMAN Flavin reductase (NADPH) OS=Homo sapiens OX=9606 GN=BLVRB PE=1 SV=3;tr|M0R192|M0R192_HUMAN Flavin reductase (NADPH) OS=Homo sapien	V9HWI1	19982000	18920000	18407000	17499000	21484000	23197000	24488000	22350000	22193000	20887000	21553000	0			24.2522	24.1734	24.1337	24.0608	24.3568	24.4674	24.5456	24.4138	24.4036	24.3161	24.3614	V9HWI1	0.274263		V9HWI1	0.233918	24.3123	3.41118	0.00152161	0.026465	-1.36634	tr|V9HWI1|V9HWI1_HUMAN Epididymis secretory protein Li 10 OS=Homo sapiens OX=9606 GN=HEL-S-10 PE=2 SV=1;sp|P30043|BLVRB_HUMAN Flavin reductase (NADPH) OS=Homo sapiens OX=9606 GN=BLVRB PE=1 SV=3;tr|M0R192|M0R192_HUMAN Flavin reductase (NADPH) OS=Homo sapien				V9HWI1	0.233918	24.3123	0
5472	1888;25651	Q8WY78;Q5JZH3;Q969T3	Sorting nexin-21	C20orf161;SNX21	tr|Q8WY78|Q8WY78_HUMAN Chromosome 20 open reading frame 161, isoform CRA_a OS=Homo sapiens OX=9606 GN=C20orf161 PE=2 SV=1;tr|Q5JZH3|Q5JZH3_HUMAN Sorting nexin-21 OS=Homo sapiens OX=9606 GN=SNX21 PE=1 SV=1;sp|Q969T3|SNX21_HUMAN Sorting nexin-21 OS=Homo sapi	Q8WY78	260020	233970	235420	204510	245760	256730	308750	288530	267800	264110	270080	0			17.9883	17.836	17.8449	17.6418	17.9069	17.9699	18.2361	18.1384	18.0308	18.0108	18.043	Q8WY78	0.249454		Q8WY78	0.233622	17.9604	3.29215	0.00212211	0.0315486	-1.67362	tr|Q8WY78|Q8WY78_HUMAN Chromosome 20 open reading frame 161, isoform CRA_a OS=Homo sapiens OX=9606 GN=C20orf161 PE=2 SV=1;tr|Q5JZH3|Q5JZH3_HUMAN Sorting nexin-21 OS=Homo sapiens OX=9606 GN=SNX21 PE=1 SV=1;sp|Q969T3|SNX21_HUMAN Sorting nexin-21 OS=Homo sapi				Q8WY78	0.233622	17.9604	0
105	2513;8193;45873;60756	A0A024QZZ6;Q96NT0;B8ZZ99;F8WCZ3	Coiled-coil domain-containing protein 115	MGC12981;CCDC115	tr|A0A024QZZ6|A0A024QZZ6_HUMAN Uncharacterized protein OS=Homo sapiens OX=9606 GN=MGC12981 PE=4 SV=1;sp|Q96NT0|CC115_HUMAN Coiled-coil domain-containing protein 115 OS=Homo sapiens OX=9606 GN=CCDC115 PE=1 SV=1;tr|B8ZZ99|B8ZZ99_HUMAN Coiled-coil domain-cont	A0A024QZZ6	3104100	3101400	2395100	2298100	3111700	3113100	3634700	3140600	3379400	3085100	3748200	0			21.5657	21.5645	21.1916	21.132	21.5693	21.5699	21.7934	21.5826	21.6883	21.5569	21.8378	A0A024QZZ6	0.274762		A0A024QZZ6	0.233602	21.5214	2.9345	0.00558053	0.0464598	-2.55891	tr|A0A024QZZ6|A0A024QZZ6_HUMAN Uncharacterized protein OS=Homo sapiens OX=9606 GN=MGC12981 PE=4 SV=1;sp|Q96NT0|CC115_HUMAN Coiled-coil domain-containing protein 115 OS=Homo sapiens OX=9606 GN=CCDC115 PE=1 SV=1;tr|B8ZZ99|B8ZZ99_HUMAN Coiled-coil domain-cont				A0A024QZZ6	0.233602	21.5214	0
913	35991;42584;43349;47347	E7EWC2;F5H7S7;A0A024RAJ8;Q13576;B7Z881;Q59HA3;B7Z7U6	Ras GTPase-activating-like protein IQGAP2	IQGAP2	tr|E7EWC2|E7EWC2_HUMAN Ras GTPase-activating-like protein IQGAP2 (Fragment) OS=Homo sapiens OX=9606 GN=IQGAP2 PE=1 SV=1;tr|F5H7S7|F5H7S7_HUMAN Ras GTPase-activating-like protein IQGAP2 OS=Homo sapiens OX=9606 GN=IQGAP2 PE=1 SV=2;tr|A0A024RAJ8|A0A024RAJ8_HU	E7EWC2	4433000	4917800	3947700	3866600	5235500	5844900	5953400	5004700	4438200	5064600	3562000	0			22.0799	22.2296	21.9126	21.8826	22.3199	22.4788	22.5053	22.2549	22.0815	22.272	21.7643	E7EWC2	0.292328		E7EWC2	0.23358	22.2017	2.86429	0.00670492	0.0497761	-2.72539	tr|E7EWC2|E7EWC2_HUMAN Ras GTPase-activating-like protein IQGAP2 (Fragment) OS=Homo sapiens OX=9606 GN=IQGAP2 PE=1 SV=1;tr|F5H7S7|F5H7S7_HUMAN Ras GTPase-activating-like protein IQGAP2 OS=Homo sapiens OX=9606 GN=IQGAP2 PE=1 SV=2;tr|A0A024RAJ8|A0A024RAJ8_HU				E7EWC2	0.23358	22.2017	0
3118	16298;16315;17209;54522	B4DM08			tr|B4DM08|B4DM08_HUMAN cDNA FLJ60021, moderately similar to Protein transport protein Sec61 subunit alpha isoform 1 OS=Homo sapiens OX=9606 PE=2 SV=1	B4DM08	514090	530170	435840	400740	556090	569870	598310	579930	568250	529170	546440	0			18.9717	19.0161	18.7334	18.6123	19.085	19.1203	19.1905	19.1455	19.1162	19.0134	19.0597	B4DM08	0.283794		B4DM08	0.233478	19.0004	3.08795	0.00370895	0.0405953	-2.18644	tr|B4DM08|B4DM08_HUMAN cDNA FLJ60021, moderately similar to Protein transport protein Sec61 subunit alpha isoform 1 OS=Homo sapiens OX=9606 PE=2 SV=1				B4DM08	0.233478	19.0004	0
1345	10365;20919;21369;22796;36731;39499;50892;53917;54272;54423;55025;56399;58200;58886;60425;63610;63891;64862	A0A0A0MR88;A0A096LPC5;J3KP36;Q9Y4E1;A8K5W5;B4DF48;B3KMC4;Q5SRD0;B1AP61;A0A0A0MT65;Q6P0Q7	WASH complex subunit FAM21C	FAM21C	tr|A0A0A0MR88|A0A0A0MR88_HUMAN WASH complex subunit 2C OS=Homo sapiens OX=9606 GN=WASHC2C PE=1 SV=1;tr|A0A096LPC5|A0A096LPC5_HUMAN WASH complex subunit 2C OS=Homo sapiens OX=9606 GN=WASHC2C PE=1 SV=1;tr|J3KP36|J3KP36_HUMAN WASH complex subunit 2C OS=Homo s	A0A0A0MR88	183430	166680	168060	159510	200980	197580	245180	208310	205020	178810	136950	0			17.4849	17.3467	17.3586	17.2833	17.6167	17.5921	17.9035	17.6684	17.6454	17.4481	17.0633	A0A0A0MR88	0.283105		A0A0A0MR88	0.233442	17.5348	3.0862	0.0037265	0.0405953	-2.19076	tr|A0A0A0MR88|A0A0A0MR88_HUMAN WASH complex subunit 2C OS=Homo sapiens OX=9606 GN=WASHC2C PE=1 SV=1;tr|A0A096LPC5|A0A096LPC5_HUMAN WASH complex subunit 2C OS=Homo sapiens OX=9606 GN=WASHC2C PE=1 SV=1;tr|J3KP36|J3KP36_HUMAN WASH complex subunit 2C OS=Homo s				A0A0A0MR88	0.233442	17.5348	0
3310	18635;23575	B6E614;Q5TF85;Q96IP4;W5ZLG2;W5ZL11	Protein FAM46A	XTP11;FAM46A	tr|B6E614|B6E614_HUMAN HBV XAg-transactivated protein 11 splice variant 1 OS=Homo sapiens OX=9606 GN=XTP11 PE=2 SV=1;tr|Q5TF85|Q5TF85_HUMAN Family with sequence similarity 46, member A, isoform CRA_a OS=Homo sapiens OX=9606 GN=TENT5A PE=1 SV=1;sp|Q96IP4|TE	B6E614	379810	392210	379940	350440	388250	444350	474110	441720	423600	438520	369610	0			18.5349	18.5813	18.5354	18.4188	18.5666	18.7613	18.8549	18.7528	18.6923	18.7423	18.4956	B6E614	0.243116		B6E614	0.23331	18.6441	3.60548	0.000874966	0.0187742	-0.852718	tr|B6E614|B6E614_HUMAN HBV XAg-transactivated protein 11 splice variant 1 OS=Homo sapiens OX=9606 GN=XTP11 PE=2 SV=1;tr|Q5TF85|Q5TF85_HUMAN Family with sequence similarity 46, member A, isoform CRA_a OS=Homo sapiens OX=9606 GN=TENT5A PE=1 SV=1;sp|Q96IP4|TE				B6E614	0.23331	18.6441	0
6303	4092;14058;16884;25669;26859;31034;33448;36990;48813	Q99880;Q96A08	Histone H2B type 1-L;Histone H2B type 1-A	HIST1H2BL;HIST1H2BA	sp|Q99880|H2B1L_HUMAN Histone H2B type 1-L OS=Homo sapiens OX=9606 GN=HIST1H2BL PE=1 SV=3;sp|Q96A08|H2B1A_HUMAN Histone H2B type 1-A OS=Homo sapiens OX=9606 GN=HIST1H2BA PE=1 SV=3	Q99880	4771000	3974900	4548700	4023500	4355400	4597900	5687800	5444800	5219200	4563500	3614300	0			22.1859	21.9225	22.117	21.94	22.0544	22.1325	22.4394	22.3764	22.3154	22.1217	21.7853	Q99880	0.23576		Q99880	0.233156	22.1605	3.21698	0.00261118	0.0349092	-1.86457	sp|Q99880|H2B1L_HUMAN Histone H2B type 1-L OS=Homo sapiens OX=9606 GN=HIST1H2BL PE=1 SV=3;sp|Q96A08|H2B1A_HUMAN Histone H2B type 1-A OS=Homo sapiens OX=9606 GN=HIST1H2BA PE=1 SV=3				Q99880	0.233156	22.1605	0
[truncated: 6,381 more rows]
[truncated: 3 more columns]

## Sheet: TMT2_A101D
							A101D Ctrl 11	A101D Ctrl 12	A101D Ctrl 13	A101D Ctrl 14	A101D Ctrl 15	A101D HCY 16	A101D HCY 17	A101D HCY 18	A101D HCY 19	A101D HCY 20	pool				A101D Ctrl 11	A101D Ctrl 12	A101D Ctrl 13	A101D Ctrl 14	A101D Ctrl 15	A101D HCY 16	A101D HCY 17	A101D HCY 18	A101D HCY 19	A101D HCY 20	pool			Limma -ebayes results								Treat with logFC 1.2
[truncated: 6,845 more rows]
